# Supplementary material
Source: PubMed Central journal article supplement (PMC3779515)

# Mild and Highly Selective Palladium-Catalyzed Monoarylation of Ammonia Enabled by the Use of Bulky Biarylphosphine Ligands and Palladacycle Precatalysts

*Chi Wai Cheung, David S. Surry, and Stephen L. Buchwald\**

Department of Chemistry, Massachusetts Institute of Technology,

77 Massachusetts Avenue, Cambridge, MA 02139, United States

E-mail: sbuchwal@mit.edu

## *Supporting Information*

| <b>Content</b>                                                                                                                                                                                                                                                                                                                                                                                                                     | <b>Page no.</b> |
|------------------------------------------------------------------------------------------------------------------------------------------------------------------------------------------------------------------------------------------------------------------------------------------------------------------------------------------------------------------------------------------------------------------------------------|-----------------|
| General Consideration                                                                                                                                                                                                                                                                                                                                                                                                              | S2              |
| Supplementary Experimental Results<br>(A) Effect of Pd sources on the arylation of NH <sub>3</sub><br>(B) Effect of ligands on Pd-catalyzed coupling of NH <sub>3</sub> with sterically hindered (hetero)aryl halides and five-membered heteroaryl halides.<br>(C) Control experiments for the palladium-catalyzed arylation of NH <sub>3</sub><br>(D) Additional results for the palladium-catalyzed arylation of NH <sub>3</sub> | S4              |
| Experimental Section                                                                                                                                                                                                                                                                                                                                                                                                               | S9              |
| References                                                                                                                                                                                                                                                                                                                                                                                                                         | S39             |
| List of NMR Spectra                                                                                                                                                                                                                                                                                                                                                                                                                | S43             |

## General Analytical Information

Nuclear Magnetic Resonance spectra were recorded on a Bruker 400 MHz instruments at ambient temperature. All  $^1\text{H}$  NMR spectra were measured in part per million (ppm) relative to the signals for tetramethylsilane (TMS) added into the deuterated chloroform ( $\text{CDCl}_3$ ) (0 ppm), or the signals for residual dimethyl sulfoxide (DMSO) in deuterated DMSO ( $\text{DMSO-}d_6$ ) (2.50 ppm), unless otherwise stated. Data for  $^1\text{H}$  NMR were reported as follows: chemical shift, multiplicity (s = singlet, d = doublet, t = triplet, q = quartet, sep = septet, m = multiplet, ovrlp = overlap, br = broad), coupling constants, and integration. All  $^{13}\text{C}$  NMR spectra were reported in ppm relative to  $\text{CDCl}_3$  (77.16 ppm) or  $\text{DMSO-}d_6$  (25.12 ppm) unless otherwise stated, and were obtained with complete  $^1\text{H}$  decoupling. All GC analyses were performed on an Agilent 6890 gas chromatograph with a FID detector using a J&W DB-1 column (10 m, 0.1 mm I.D.). All GC-MS analyses were performed on an Agilent 6850 gas chromatograph with a 5975 inert mass selective detector. IR spectra were reported on a Nicolet iS5 FT-IR Spectrometer. Melting points (uncorrected) were obtained on a Mel-Temp II capillary melting point apparatus. Elemental analyses were performed by Atlantic Microlabs, Inc., Norcross, GA. ESI-MS spectra were recorded on a Bruker Daltonics APEXIV 4.7 Tesla Fourier transform ion cyclotron resonance mass spectrometer (FT-ICR-MS).

## General Reagent Information

Unless otherwise noted, all chemicals used in the preparations of ligands and heteroaryl halides, and the (hetero)aryl halides used in the coupling with ammonia, were commercially available and were used as received without further purification. THF was purchased from J.T. Baker in CYCLE-TAINER® solvent-delivery kegs and vigorously purged with argon for 1 h. The THF solvent was further purified by passing it under argon pressure through two packed columns of neutral alumina. Anhydrous 1,4-dioxane (99.8%), and anhydrous ammonia solution (0.50 M in 1,4-dioxane, 100 mL) were purchased from Aldrich Chemical Co. in Seal-Seal® bottles and stored under argon. Sodium *tert*-butoxide was purchased from Aldrich Chemical Co. and the bulk was stored in a glove-box. Small quantities (~5 g) of sodium *tert*-butoxide was periodically transferred into a capped glass vial in the glove-box, taken out of the glove-box for use, and stored in the air in a desiccator cabinet (with anhydrous calcium sulfate). In order to ensure the reproducibility of the experimental results, it was recommended to consume the ammonia solution within 2 weeks once the bottle has first been used.<sup>1</sup> Ligand **L1** was purchased from Aldrich Chemical Co..  $\text{Pd}_2\text{dba}_3$  and ligand **L2** were purchased from Strem Chemicals, Inc.. Ligands **L3**,<sup>2</sup> **L4**,<sup>3</sup> and **L5**,<sup>2</sup> the palladacycle precatalyst precursor  $\text{Pd } \mu\text{-OMs}$  dimer (**S1**),<sup>4</sup> the palladacycle precatalyst **3c**,<sup>5</sup> 1-benzyl-6-chloroindole (**S2**),<sup>6</sup> 4-bromo-1-trityl-1*H*-imidazole (**S3**),<sup>7</sup> and 4-bromo-1-trityl-1*H*-pyrazole (**S4**)<sup>8</sup> were prepared according to the literature procedures.

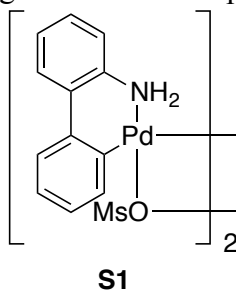

## General Considerations

All reactions for the palladium-catalyzed arylation of ammonia were set up on bench-top in the open air and carried out in re-sealable test tubes with Teflon septa under an argon atmosphere. Unless otherwise noted, the reaction test tubes were cooled to room temperature (if they were previously heated at elevated temperatures), prior to the transfers of compounds into the tubes or the purifications. Unless otherwise noted, the solutions of reagents / reactants were transferred via plastic syringe (fitted with metal needle) into the reaction test tubes under a positive argon pressure. Flash column chromatography was performed using silica gel (Silicycle, ultra pure grade) or alumina (Merck, Chromatographic Grade 80-200 Mesh). The solvent system as an eluent for column chromatography is presented as a ratio of solvent volumes. Yields reported in the publication are of isolated materials. The yields of arylamine products (anilines and heteroarylamines) represent an average of two independent runs unless otherwise noted. All arylamines were characterized by  $^1\text{H}$  NMR and  $^{13}\text{C}$  NMR spectroscopies and elemental analyses / high-resolution mass spectrometry. All unknown and most known arylamines were further characterized by IR spectroscopy and melting point determination (for solids). Unless otherwise noted, the formation of secondary diarylamine side-product was determined by GC/MS analysis, and the ratio of arylamine ( $1^\circ$ ) to secondary diarylamine ( $2^\circ$ ) ( $1^\circ : 2^\circ$ ) was determined by  $^1\text{H}$  NMR spectroscopy of the crude product based on 0.25 mmol of (hetero)aryl halide. In case the arylamine product and the diarylamine were inseparable by column chromatography, the  $1^\circ : 2^\circ$  ratio was determined by  $^1\text{H}$  NMR spectroscopy of the isolated mixture of arylamine and diarylamine. In case no diarylamine was detected by GC/MS analysis, the  $1^\circ : 2^\circ$  ratio was assumed to be  $> 50 : 1$ .

## Safety Precautions

All reactions with ammonia should be performed behind a blast shield, since high pressure can be built up inside the test tubes at elevated temperature and explosion of the tubes could occur.

## Supplementary Experimental Results

**(A) Effect of palladium sources on the arylation of NH<sub>3</sub>.** The efficiency of two palladium sources, **(A)** Pd<sub>2</sub>dba<sub>3</sub> and **(B)** precatalyst **3a**, were compared by using the identical Pd : **L6** ratio (Pd (2 mol %) : **L6** (2 mol %)) in the Pd-catalyzed coupling of ammonia with heteroaryl halides and heteroaryl-substituted aryl chloride (Table S1). Pd<sub>2</sub>dba<sub>3</sub> and **3a** performed similarly to give similar yields of arylamines in the amination with 1-(4-chlorophenyl)imidazole, 2-chloro-6-(dimethylamino)pyrazine, 6-bromoquinoxaline and 3-bromo-5-methylpyridine (Table S1, entries 1-4). However, Pd<sub>2</sub>dba<sub>3</sub> was found to be less effective than **3a** in the amination with 2-chloro-5-methylpyridine and 5-chlorobenzoxazole, since lower yields of arylamines were obtained with the use of Pd<sub>2</sub>dba<sub>3</sub> (Table S1, entries 5 and 6). In addition, Pd<sub>2</sub>dba<sub>3</sub> was less effective than **3a** in the amination with 6-chloroquinoline and 2-chloro-4,6-dimethoxypyrimidine, due to the incomplete conversion with the use of Pd<sub>2</sub>dba<sub>3</sub> (Table S1, entries 7 and 8). While the use of premixed Pd<sub>2</sub>dba<sub>3</sub>/**L6**<sup>9</sup> led to complete conversion of 6-chloroquinoline, it did not lead to complete conversion of 2-chloro-4,6-dimethoxypyrimidine (Table S1, entries 7 and 8). Thus, **3a/L6** was selected as the catalyst system for the study of substrate scope of (hetero)aryl halides in the cross-coupling with ammonia.

**(B) Effect of ligands on Pd-catalyzed coupling of NH<sub>3</sub> with sterically hindered (hetero)aryl halides and five-membered heteroaryl halides.** The ligand effect on the coupling of NH<sub>3</sub> with sterically hindered (hetero)aryl halides and five-membered heteroaryl halides was examined (Scheme S1). We found that the use of **L7** (with less bulky P-bound phenyl groups) allowed for the complete conversion of sterically hindered (hetero)aryl halides to the arylamines in excellent yields, whereas the use of **L4** (with the most bulkiest P-bound 1-adamantyl groups) allowed for the complete conversion of five-membered heteroaryl halide to the arylamines in high yield.

**(C) Control experiments for the palladium-catalyzed arylation of NH<sub>3</sub>.** To ensure that the coupling of ammonia with electron-poor and activated (hetero)aryl halides is mediated by palladium rather than nucleophilic aromatic substitution, control experiments without the addition of precatalyst **3a** were carried out (Scheme S2). In the presence of **3a**, all (hetero)aryl halides were completely converted to the arylamine products. In contrast, when no **3a** was added, no arylamines or only traces of arylamines were detected (as shown in the parentheses in Scheme S2). The control experiments suggest that palladium-catalyzed arylation of ammonia does operate to yield the arylamines.

**(D) Additional results for the palladium-catalyzed arylation of NH<sub>3</sub>.** The reaction protocols were also applicable for the coupling of ammonia with other (hetero)aryl halides (Scheme S3). The yields of the arylamine products were determined by <sup>1</sup>H NMR spectroscopy. The products were characterized by <sup>1</sup>H NMR spectroscopy and most of them were further characterized by GC/MS analysis. Of importance, some of the arylamine products were partially lost or decomposed during the column chromatography. However, some of the (hetero)aryl halides remained difficult coupling partners, including the aryl halides bearing acidic protons (-CO<sub>2</sub>H, -OH, -C(O)NH<sub>2</sub>) and the NH-unprotected heteroaryl halides (e.g. 5-chloroindole, 5-chlorobenzimidazole, 3-chloroindazole, 4-bromopyrazole, 4-bromo-2-methylimidazole).

**Table S1. Effect of Pd Sources on the Arylation of NH<sub>3</sub><sup>a</sup>**

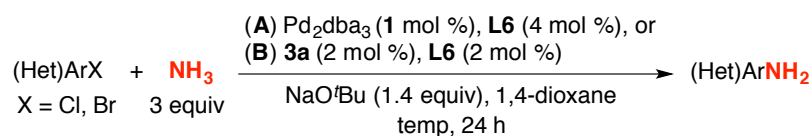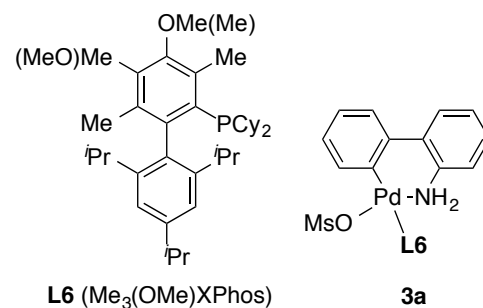

| Entry | (Het)ArX | Temp/ <sup>o</sup> C | Pd source                            | Conversion/% <sup>b</sup> | Yield/% <sup>b</sup> |
|-------|----------|----------------------|--------------------------------------|---------------------------|----------------------|
| 1     |          | 80                   | (A) Pd <sub>2</sub> dba <sub>3</sub> | 100                       | 96                   |
|       |          |                      | (B) <b>3a</b>                        | 100                       | 94                   |
| 2     |          | 50                   | (A) Pd <sub>2</sub> dba <sub>3</sub> | 100                       | 96                   |
|       |          |                      | (B) <b>3a</b>                        | 100                       | 100                  |
| 3     |          | 50                   | (A) Pd <sub>2</sub> dba <sub>3</sub> | 100                       | 88                   |
|       |          |                      | (B) <b>3a</b>                        | 100                       | 85                   |
| 4     |          | 80                   | (A) Pd <sub>2</sub> dba <sub>3</sub> | 100                       | 86                   |
|       |          |                      | (B) <b>3a</b>                        | 100                       | 84                   |
| 5     |          | 50                   | (A) Pd <sub>2</sub> dba <sub>3</sub> | 100                       | 80                   |
|       |          |                      | (B) <b>3a</b>                        | 100                       | 90                   |
| 6     |          | 80                   | (A) Pd <sub>2</sub> dba <sub>3</sub> | 100                       | 61                   |
|       |          |                      | (B) <b>3a</b>                        | 100                       | 72                   |
| 7     |          | 50                   | (A) Pd <sub>2</sub> dba <sub>3</sub> | 75 (100) <sup>c</sup>     | 75 (93) <sup>c</sup> |
|       |          |                      | (B) <b>3a</b>                        | 100                       | 100                  |
| 8     |          | 50                   | (A) Pd <sub>2</sub> dba <sub>3</sub> | 63 (55) <sup>c</sup>      | 36 (31) <sup>c</sup> |
|       |          |                      | (B) <b>3a</b>                        | 100                       | 80 <sup>d</sup>      |

<sup>a</sup> Reaction Conditions: HetArX (0.25 mmol), NH<sub>3</sub> (0.75 mmol, 3 equiv), NaO<sup>t</sup>Bu (0.35 mmol, 1.4 equiv), Pd<sub>2</sub>dba<sub>3</sub> (1 mol), **L6** (4 mol %), (or **3a** (2 mol %), **L6** (2 mol %)), 1,4-dioxane (2.5 mL, 0.10 M), 24 h. <sup>b</sup> Determined by <sup>1</sup>H NMR spectroscopy using 1,3,5-trimethoxybenzene as internal standard. <sup>c</sup> Pd<sub>2</sub>dba<sub>3</sub> (1 mol %) and **L6** (4 mol %) were preheated in 1,4-dioxane (1.0 mL) at 100 °C for 3 min prior to the reaction. <sup>d</sup> Yield is of isolated product based on 1 mmol of HetArX (average of 2 runs).

**Scheme S1. Effect of ligands on Pd-catalyzed coupling of NH<sub>3</sub> with sterically hindered (hetero)aryl halides and five-membered heteroaryl halides<sup>a</sup>**

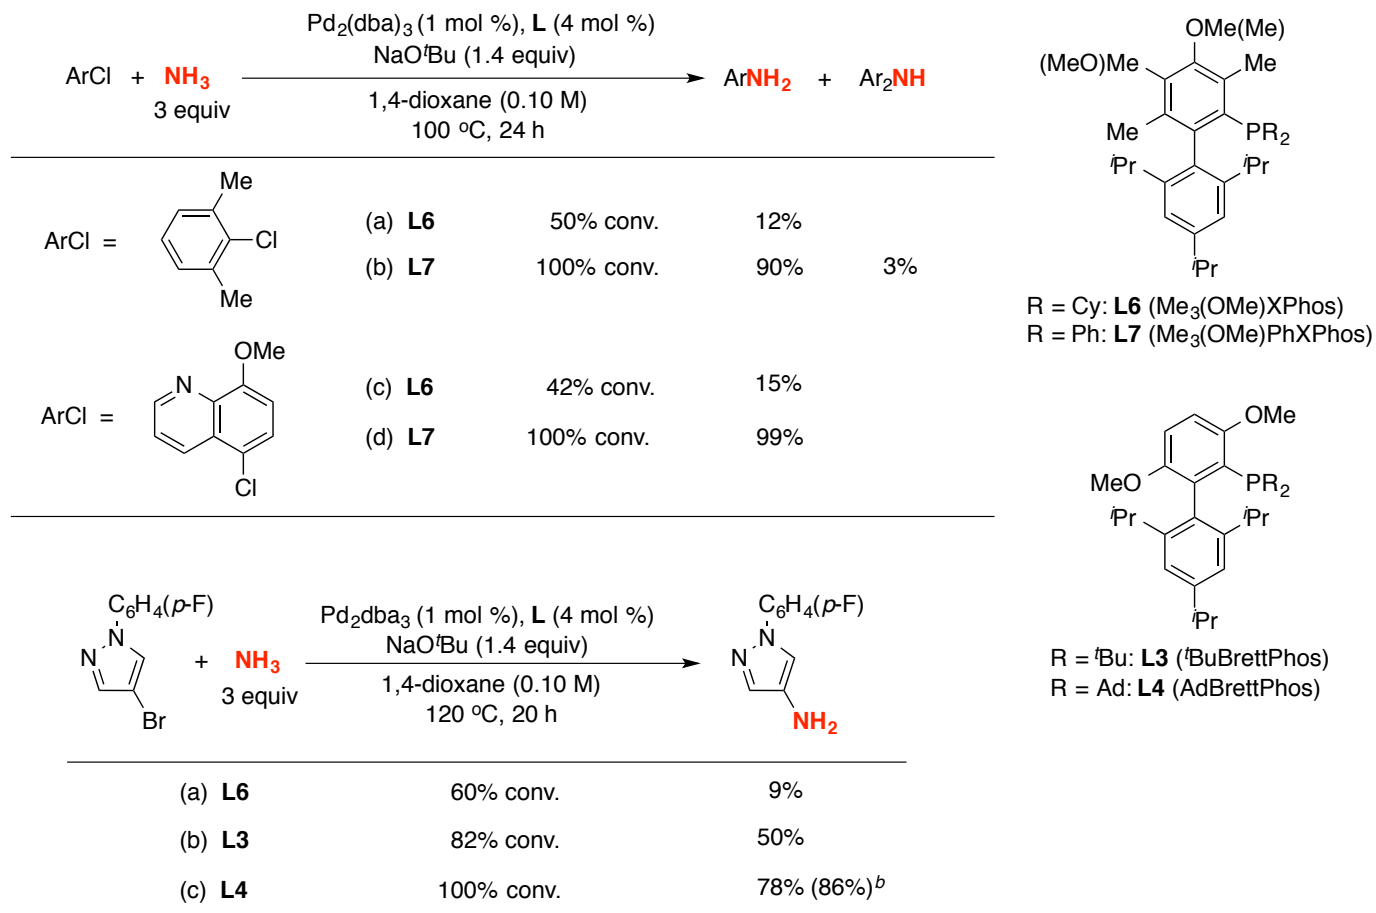

<sup>a</sup> Reaction Conditions: (Het)ArX (0.25 mmol), NH<sub>3</sub> (0.75 mmol, 3 equiv), NaO<sup>t</sup>Bu (0.35 mmol, 1.4 equiv), Pd<sub>2</sub>dba<sub>3</sub> (1 mol), ligand (4 mol %), 1,4-dioxane (2.5 mL, 0.10 M), 20-24 h; <sup>1</sup>H NMR yields were reported using 1,3,5-trimethoxybenzene as internal standard. <sup>b</sup> Isolated yield based on 1 mmol HetArX.

## Scheme S2. Control experiments for the Pd-catalyzed arylation of NH<sub>3</sub><sup>a</sup>

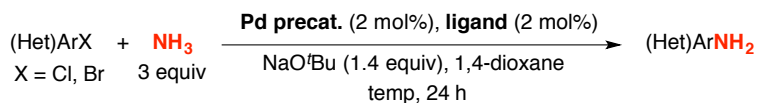

### Pd precat.: 3a, ligand: L6

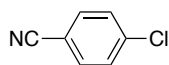

60 °C, 74% (0%)

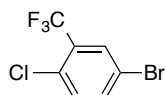

100 °C, 72% (0%)

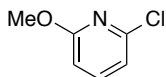

50 °C, 87% (0%)

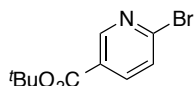

50 °C, 59% (0%)

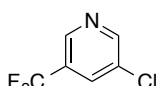

80 °C, 94% (0%)

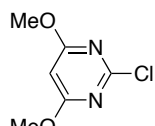

50 °C, 80% (0%)

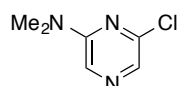

50 °C, 62% (0%)<sup>b</sup>

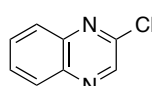

50 °C, 70% (0%)

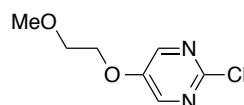

100 °C, 63% (< 1%)<sup>d,e</sup>

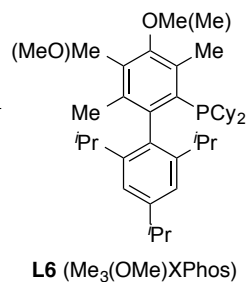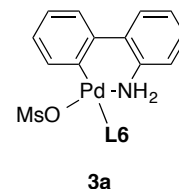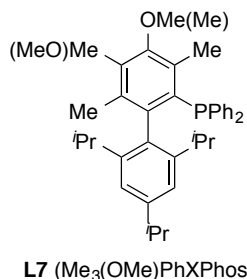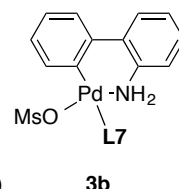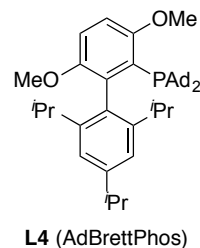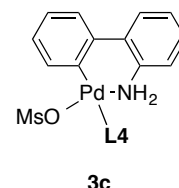

### Pd precat.: 3b, ligand: L7

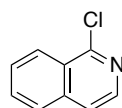

50 °C, 76% (0%)<sup>b</sup>

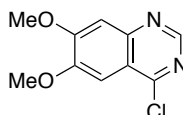

50 °C, 86% (1%)<sup>e</sup>

### Pd precat.: 3c, ligand: L4

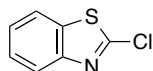

RT, 96% (0%)

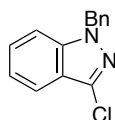

80 °C, 79% (0%)

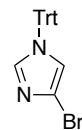

80 °C, 90% (0%)<sup>b</sup>

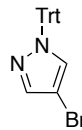

100 °C, 79%<sup>f</sup> (0%)<sup>b</sup>

<sup>a</sup> **Reaction conditions with Pd and ligand:** HetArX (1 mmol), NH<sub>3</sub> (3 mmol), NaO<sup>t</sup>Bu (1.4 mmol), precatalyst (2 mol %), ligand (2 mol %), 1,4-dioxane (10 mL, 0.10 M), 24 h; the yields are of isolated products. **Reaction conditions without Pd:** HetArX (0.25 mmol, 1 equiv), NH<sub>3</sub> (0.75 mmol, 3 equiv), NaO<sup>t</sup>Bu (0.35 mmol, 1.4 equiv), ligand (2 mol %), 1,4-dioxane (2.5 mL, 0.10 M), 24 h; the yields in parentheses are of the arylamine products determined by GC/MS analysis. <sup>b</sup> The formation of product was judged by TLC analysis by comparing with authentic products. <sup>c</sup> HetArX (2 mmol, 1 equiv), NH<sub>3</sub> (6 mmol, 3 equiv), NaO<sup>t</sup>Bu (2.8 mmol, 1.4 equiv) and 1,4-dioxane (13 mL, 0.154 M). <sup>d</sup> 1,4-dioxane (1.6 mL, 0.154 M). <sup>e</sup> The yield of product was determined by <sup>1</sup>H NMR spectroscopy using 1,3,5-trimethoxybenzene as internal standard. <sup>f</sup> 20 h.

**Scheme S3. Additional results for the palladium-catalyzed arylation of NH<sub>3</sub><sup>a</sup>**

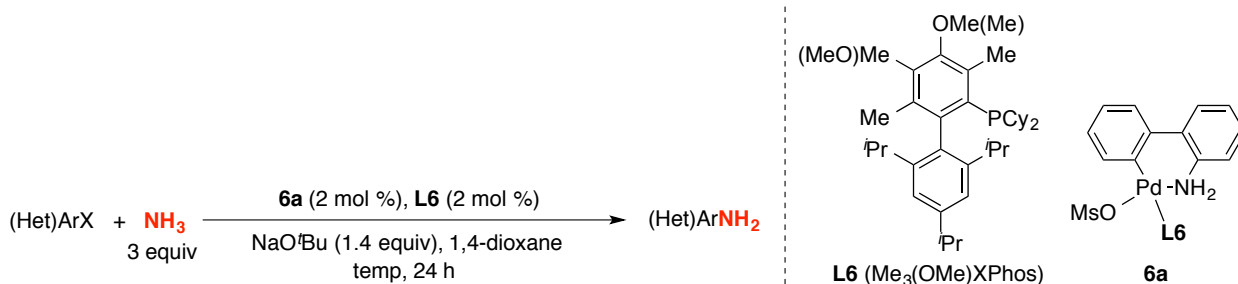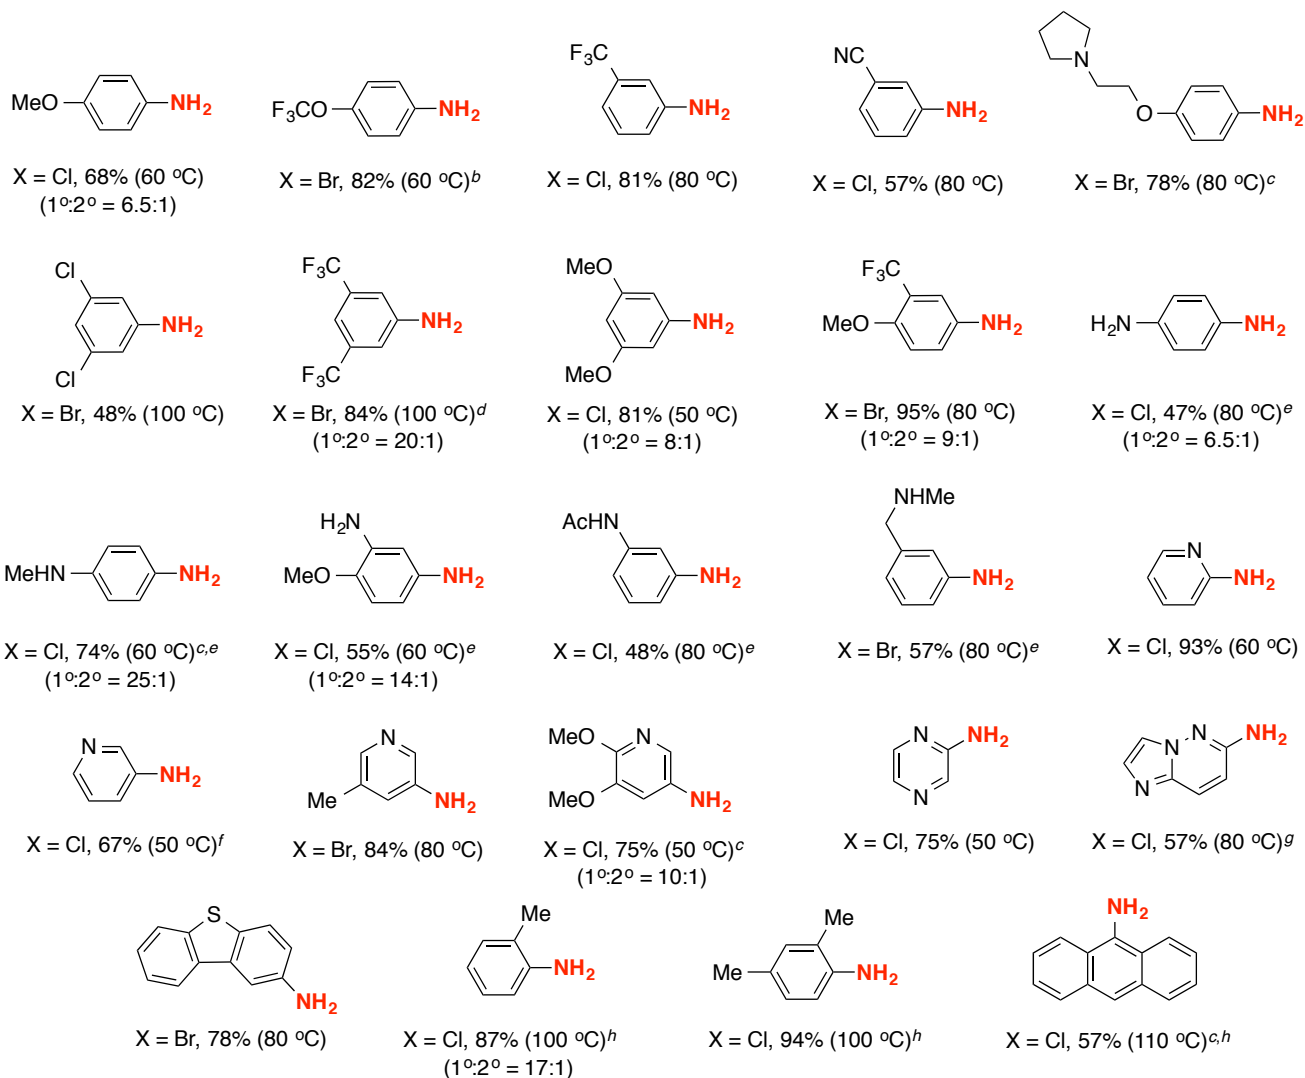

<sup>a</sup> Reaction conditions: HetArX (0.25 mmol, 1 equiv), NH<sub>3</sub> (0.75 mmol, 3 equiv), NaO<sup>t</sup>Bu (0.35 mmol, 1.4 equiv), **3a** (2 mol %), **L6** (2 mol %), 1,4-dioxane (2.5 mL, 0.10 M), 24 h; the yield and the ratio of primary to secondary amine (1°:2°) were determined by <sup>1</sup>H NMR spectroscopy. <sup>b</sup> The product was isolated in low yield upon column chromatography likely due to its volatility. <sup>c</sup> The product decomposed to an unknown product mixture or was partially lost upon column chromatography. <sup>d</sup> 16 h. <sup>e</sup> NaO<sup>t</sup>Bu (0.55 mmol, 2.2 equiv). <sup>f</sup> GC yield using *n*-dodecane as internal standard. <sup>g</sup> HetArCl in the form of HetArCl·HCl; NaO<sup>t</sup>Bu (0.60 mmol, 2.4 equiv). <sup>h</sup> **3b** (2 mol %) / **L7** (2 mol %).



## Preparations of Biaryl Phosphine Ligands (L6-L9):

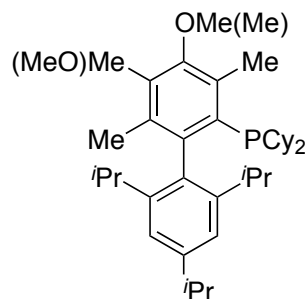

**Me<sub>3</sub>(OMe)XPhos**

**Dicyclohexyl(2',4',6'-triisopropyl-4-methoxy-3,5,6-trimethyl-[1,1'-biphenyl]-2-yl)phosphine** /  
**Dicyclohexyl(2',4',6'-triisopropyl-5-methoxy-3,4,6-trimethyl-[1,1'-biphenyl]-2-yl)phosphine**  
(**Me<sub>3</sub>(OMe)XPhos (L6)**). An oven-dried 25 mL re-sealable screw-cap test tube (**A**) equipped with a Teflon-coated magnetic stir bar was charged with magnesium turnings (486 mg, 20.0 mmol, 4.0 equiv). Tube **A** was then evacuated and backfilled with argon (this sequence was repeated a total of three times). 2-Bromo-1,3,5-triisopropylbenzene (1.26 mL, 5.0 mmol, 1.0 equiv), 1,2-dibromobenzene (40  $\mu$ L), and THF (8.0 mL) were added into tube **A** via syringe. Tube **A** was then stirred at 80 °C in an oil bath for 1.5 h to form a Grignard reagent. Simultaneously, an oven-dried 20 mL re-sealable screw-cap test tube (**B**) was charged with 1,2-dibromo-4-methoxy-3,5,6-trimethylbenzene (1.85 g, 6.0 mmol, 1.2 equiv). Tube **B** was then evacuated and backfilled with argon (this sequence was repeated a total of three times), and THF (4.0 mL) was added into the tube via syringe. The solution of 1,2-dibromo-4-methoxy-3,5,6-trimethylbenzene from tube **B** was then transferred into the Grignard reagent of 2-bromo-1,3,5-triisopropylbenzene in tube **A** followed by the addition of 1,2-dibromobenzene (40  $\mu$ L) via syringe. The reaction mixture in tube **A** was then stirred at 80 °C in an oil bath for 1 h; at this time, 1,2-dibromobenzene (20  $\mu$ L) was added via a syringe, and the reaction mixture was stirred at 80 °C for 1 h (this sequence was repeated a total of two times). Finally, 1,2-dibromobenzene (40  $\mu$ L) was added via syringe, and the resulting reaction mixture in tube **A** was stirred at 80 °C for 2 h. An oven-dried 25 mL re-sealable screw-cap test tube (**C**) equipped with a Teflon-coated magnetic stir bar was charged with copper(I) chloride (495 mg, 5.0 mmol, 1.0 equiv), and the tube was evacuated and backfilled with argon (this sequence was repeated a total of three times). The hot reaction mixture from tube **A** was quickly and carefully cannulated (Note: Caution!) into tube **C**.<sup>10</sup> Chlorodicyclohexylphosphine (1.3 mL, 6.0 mmol, 1.2 equiv) was added into tube **C** via syringe, and the tube was heated at 80 °C in an oil bath for 24 h. After cooling to room temperature, the reaction mixture was diluted with EtOAc (~50 mL), washed with aqueous ammonia solution (27-30%) until the aqueous fraction was colorless, and then was washed with saturated NaCl solution. The organic fraction was dried over Na<sub>2</sub>SO<sub>4</sub>, and concentrated *in vacuo* with the aid of a rotary evaporator to give a yellow crude oil. The crude oil was diluted with EtOAc (~5 mL) and then MeOH (~50 mL) was added. The mixture was cooled to 0 °C overnight to obtain a white precipitate. The solid so formed was isolated by filtration, washed with cold MeOH, and dried *in vacuo*. A white powdery solid **L6** (1.65 g, 3.01 mmol, 60%) was obtained as an 1.3 : 1.0 mixture of two isomers as determined by the methoxy proton signals by <sup>1</sup>H NMR spectroscopy (methoxy proton of major isomer: 3.73 ppm; minor isomer: 3.66 ppm). <sup>1</sup>H NMR (400 MHz, CDCl<sub>3</sub>)  $\delta$ : 6.96 (s, 2 H), 3.73 (s, 1.7 H), 3.66 (s, 1.3 H), 2.92 (sep,  $J$  = 6.8 Hz, 1 H), 2.43-2.34 (ovrlp, 5 H), 2.25 (s, 1.3 H), 2.19 (s, 1.7 H), 2.04-1.99 (m, 2 H), 1.80-1.78 (m, 2 H), 1.66-1.63 (ovrlp, 9 H), 1.41-1.38 (m, 2 H), 1.29 (d,  $J$  = 7.2 Hz, 6 H), 1.25-1.09 (ovrlp, 14 H), 1.01-0.89 (ovrlp, 8 H). <sup>13</sup>C NMR (100 MHz, CDCl<sub>3</sub>)  $\delta$ : 157.9, 155.4, 149.1, 148.7, 147.1, 145.68, 145.66, 145.5, 145.32, 145.30, 145.1, 141.7, 141.6,

137.9, 137.8, 137.6, 137.5, 135.9, 135.8, 133.8, 133.7, 133.2, 132.9, 131.0, 130.1, 129.9, 128.6, 128.5, 128.0, 59.8, 59.5, 39.9, 39.8, 39.3, 39.1, 34.5, 34.4, 34.2, 34.1, 34.0, 30.4, 30.32, 30.27, 30.24, 30.18, 28.2, 28.1, 28.0, 27.8, 27.6, 26.5, 25.09, 25.06, 25.0, 24.8, 24.2, 20.2, 19.9, 19.8, 15.90, 15.87, 15.8, 13.5, 13.3 (Observed complexity due to C-P splitting).  $^{31}\text{P}$  NMR (162 MHz,  $\text{CDCl}_3$ )  $\delta$ : 2.3, 0.8. **IR** (neat  $\text{cm}^{-1}$ ) 2930, 2847, 1458, 1379, 1219, 1086, 1002, 874. **Anal.** Calcd. for  $\text{C}_{37}\text{H}_{57}\text{OP}$ : C, 80.97; H, 10.47; Found: C, 80.97; H, 10.38.

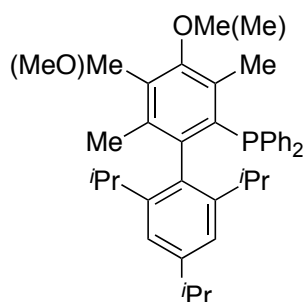

**$\text{Me}_3(\text{OMe})\text{PhXPhos}$**

**Diphenyl(2',4',6'-triisopropyl-4-methoxy-3,5,6-trimethyl-[1,1'-biphenyl]-2-yl)phosphine** /  
**Diphenyl(2',4',6'-triisopropyl-5-methoxy-3,4,6-trimethyl-[1,1'-biphenyl]-2-yl)phosphine**  
**( $\text{Me}_3(\text{OMe})\text{PhXPhos}$  (**L7**)).** The procedure to prepare **L6** was employed except that magnesium turnings (292 mg, 12.0 mmol, 4.0 equiv) and 2-bromo-1,3,5-triisopropylbenzene (0.76 mL, 3.0 mmol, 1.0 equiv) in THF (5 mL), 1,2-dibromo-4-methoxy-3,5,6-trimethylbenzene (1.11 g, 3.6 mmol, 1.2 equiv) in THF (2 mL), copper(I) chloride (327 mg, 3.3 mmol, 1.1 equiv), and chlorodiphenylphosphine (0.71 mL, 3.3 mmol, 1.1 equiv), were used. A white powdery solid **L7** (802 mg, 1.49 mmol, 50%) was obtained as a 1.3 : 1.0 mixture of two isomers as determined by the methoxy proton signals by  $^1\text{H}$  NMR spectroscopy (methoxy proton of major isomer: 3.77 ppm; minor isomer: 3.70 ppm).  $^1\text{H}$  NMR (400 MHz,  $\text{CDCl}_3$ )  $\delta$ : 7.30-7.15 (ovrlp, 10 H), 6.93 (s, 2 H), 3.77 (s, 1.7 H), 3.70 (s, 1.3 H), 2.89 (sep,  $J = 6.8$  Hz, 1 H), 2.49-2.42 (ovrlp, 2 H), 2.31 (s, 1.3 H), 2.24 (s, 1.7 H), 1.87 (s, 1.7 H), 1.84 (s, 1.3 H), 1.78 (s, 1.3 H), 1.77 (s, 1.7 H), 1.25 (d,  $J = 6.8$  Hz, 6 H), 1.00-0.96 (ovrlp, 6 H), 0.70-0.68 (ovrlp, 6 H).  $^{13}\text{C}$  NMR (100 MHz,  $\text{CDCl}_3$ )  $\delta$ : 159.1, 156.8, 149.4, 149.0, 147.5, 146.11, 146.09, 145.77, 145.75, 145.6, 145.2, 142.64, 142.60, 138.4, 138.2, 138.1, 137.9, 137.2, 137.1, 136.8, 136.7, 135.7, 135.6, 135.0, 134.9, 132.8, 132.1, 131.9, 131.7, 131.6, 131.3, 131.13, 131.09, 131.0, 130.1, 129.2, 129.1, 128.5, 128.4, 128.2, 127.0, 126.9, 120.9, 120.8, 60.0, 59.91, 59.87, 59.8, 34.0, 30.7, 30.6, 25.02, 24.96, 24.4, 24.2, 23.9, 23.7, 23.6, 22.1, 19.19, 19.15, 17.5, 15.3, 13.6, 13.4 (Observed complexity due to C-P splitting).  $^{31}\text{P}$  NMR (162 MHz,  $\text{CDCl}_3$ )  $\delta$ : -11.8, -12.6. **IR** (neat  $\text{cm}^{-1}$ ) 2958, 2865, 1478, 1432, 1381, 1230, 1088, 876, 747, 739. **HRMS** (ESI) Calcd for  $\text{C}_{37}\text{H}_{45}\text{OP}$  [ $\text{M}+\text{H}$ ]: 537.3281; Found: 537.3283.

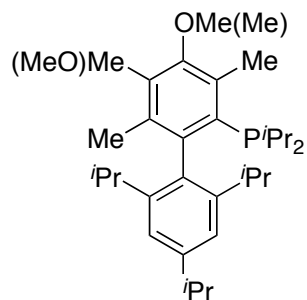

**Me<sub>3</sub>(OMe)<sup>i</sup>PrXPhos**

**Diisopropyl(2',4',6'-triisopropyl-4-methoxy-3,5,6-trimethyl-[1,1'-biphenyl]-2-yl)phosphine** /  
**Diisopropyl(2',4',6'-triisopropyl-5-methoxy-3,4,6-trimethyl-[1,1'-biphenyl]-2-yl)phosphine**  
**(Me<sub>3</sub>(OMe)<sup>i</sup>PrXPhos (L8))**. An oven-dried 25 mL re-sealable screw-cap test tube (**A**) equipped with a Teflon-coated magnetic stir bar was charged with magnesium turnings (292 mg, 12.0 mmol, 4.0 equiv). Tube **A** was then evacuated and backfilled with argon (this sequence was repeated a total of three times). 2-Bromo-1,3,5-triisopropylbenzene (0.76 mL, 3.0 mmol, 1.0 equiv), 1,2-dibromobenzene (20  $\mu$ L), and THF (5.0 mL) were added into the tube via syringe. The tube was then stirred at 80 °C in an oil bath for 1.5 h to form a Grignard reagent. Simultaneously, an oven-dried 20 mL re-sealable screw-cap test tube (**B**) was charged with 1,2-dibromo-4-methoxy-3,5,6-trimethylbenzene (1.11 g, 3.6 mmol, 1.2 equiv). Tube **B** was then evacuated and backfilled with argon (this sequence was repeated a total of three times), and THF (2.0 mL) was added into the tube via syringe. The solution of 1,2-dibromo-4-methoxy-3,5,6-trimethylbenzene from tube **B** was then transferred into the Grignard reagent of 2-bromo-1,3,5-triisopropylbenzene in tube **A** followed by the addition of 1,2-dibromobenzene (20  $\mu$ L) via syringe. The reaction mixture in tube **A** was then stirred at 80 °C in an oil bath for 1 h; at this time, 1,2-dibromobenzene (10  $\mu$ L) was added via syringe, and the reaction mixture was further stirred at 80 °C for 1 h (this sequence was repeated a total of two times). Finally, 1,2-dibromobenzene (20  $\mu$ L) was added via syringe, and the reaction mixture in tube **A** was further stirred at 80 °C for 2 h. After cooling to room temperature, copper(I) chloride (297 mg, 3.0 mmol, 1.0 equiv) was quickly transferred into tube **A** under a positive argon pressure. Chlorodiisopropylphosphine (0.71 mL, 3.3 mmol, 1.1 equiv) was then added into tube **A** via syringe, and the reaction mixture was stirred at 80 °C in an oil bath for 18 h. The reaction mixture was diluted with EtOAc (~50 mL), washed with aqueous ammonia solution (27-30%) until the aqueous fraction was colorless, and then washed with saturated NaCl solution. The organic fraction was dried over Na<sub>2</sub>SO<sub>4</sub>, and concentrated *in vacuo* with the aid of a rotary evaporator to give a yellow crude oil. The crude oil was diluted with EtOAc (~3 mL) and then MeOH (~30 mL) was added. The mixture was cooled to 0 °C overnight to obtain a white precipitate. The solid so formed was isolated by filtration, washed with cold MeOH, and dried *in vacuo*. A white powdery solid **L8** (260 mg, 0.56 mmol, 18%) was obtained as a 1.1 : 1.0 mixture of two isomers as determined by the methoxy proton signals by <sup>1</sup>H NMR spectroscopy (methoxy proton of major isomer: 3.73 ppm; minor isomer: 3.66 ppm). <sup>1</sup>H NMR (400 MHz, CDCl<sub>3</sub>)  $\delta$ : 6.97 (s, 0.9 H), 6.96 (s, 1.1 H), 3.73 (s, 1.6 H), 3.66 (s, 1.4 H), 2.93 (sep, *J* = 6.8 Hz, 1 H), 2.45-2.36 (ovrlp, 5 H), 2.30-2.20 (ovrlp, 5 H), 1.67 (s, 1.4 H), 1.64 (s, 1.6 H), 1.30 (d, *J* = 6.8 Hz, 6 H), 1.17 (d, *J* = 6.8 Hz, 6 H), 1.15-1.08 (m, 6 H), 0.94-0.85 (ovrlp, 12 H). <sup>13</sup>C NMR (100 MHz, CDCl<sub>3</sub>)  $\delta$ : 158.02, 158.00, 155.7, 149.2, 148.7, 147.2, 145.68, 145.66, 145.4, 145.32, 145.30, 145.03, 141.21, 141.16, 137.79, 137.69, 137.5, 137.4, 135.85, 135.76, 135.0, 134.7, 133.30, 133.26, 132.0, 131.7, 131.0, 128.5, 128.4, 128.3, 120.8, 120.7, 59.9, 59.6, 34.1, 30.39, 30.36, 29.0, 28.9, 28.4, 28.2, 25.1, 25.0, 24.78, 24.77, 24.64, 24.62, 24.3, 23.7, 23.5, 23.4, 23.2, 21.2, 21.1, 21.0, 20.2, 19.79, 19.75, 15.82, 15.79, 15.76, 13.5, 13.3 (Observed complexity due to C-P splitting). <sup>31</sup>P NMR (162 MHz, CDCl<sub>3</sub>)  $\delta$ : 19.7, 18.3. IR

(neat  $\text{cm}^{-1}$ ) 2957, 2924, 2865, 1457, 1380, 1218, 1088, 1000, 876, 630. **Anal.** Calcd. for  $\text{C}_{31}\text{H}_{49}\text{OP}$ : C, 79.44; H, 10.54; Found: C, 79.41; H, 10.70.

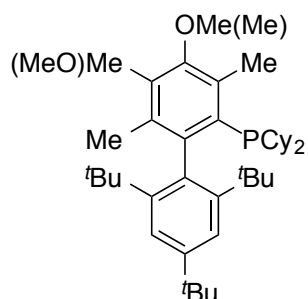

**Dicyclohexyl(2',4',6'-tri-*tert*-butyl-4-methoxy-3,5,6-trimethyl-[1,1'-biphenyl]-2-yl)phosphine / Dicyclohexyl(2',4',6'-tri-*tert*-butyl-5-methoxy-3,4,6-trimethyl-[1,1'-biphenyl]-2-yl)phosphine (L9).**

The procedure to prepare **L6** was employed except that magnesium turnings (292 mg, 12.0 mmol, 4.0 equiv) and 2-bromo-1,3,5-tri-*tert*-butylbenzene (976 mg, 3.0 mmol, 1.0 equiv) in THF (5 mL), 1,2-dibromo-4-methoxy-3,5,6-trimethylbenzene (1.11 g, 3.6 mmol, 1.2 equiv) in THF (3 mL), copper(I) chloride (297 mg, 3.0 mmol, 1.0 equiv), and chlorodicyclohexylphosphine (0.70 mL, 3.15 mmol, 1.05 equiv), were used. A white powdery solid **L9** (1.14 g, 1.93 mmol, 64%) was obtained as a 1.0 : 1.0 mixture of two isomers as determined by the methoxy proton signals by  $^1\text{H}$  NMR spectroscopy (methoxy proton: 3.67 and 3.65 ppm).  $^1\text{H}$  NMR (400 MHz,  $\text{CDCl}_3$ )  $\delta$ : 7.37 (s, 2 H), 3.67 (s, 1.5 H), 3.65 (s, 1.5 H), 2.36 (s, 1.5 H), 2.33 (s, 1.5 H), 2.23 (s, 1.5 H), 2.18 (s, 1.5 H), 2.07-1.97 (ovrlp, 5 H), 1.90-1.85 (m, 2 H), 1.71-1.69 (m, 2 H), 1.63-1.57 (m, 4 H), 1.33 (s, 9 H), 1.28-1.09 (m, 10 H), 1.06-0.90 (ovrlp, 20 H).  $^{13}\text{C}$  NMR (100 MHz,  $\text{CDCl}_3$ )  $\delta$ : 156.7, 156.3, 150.9, 150.5, 147.64, 147.58, 147.3, 146.52, 146.51, 146.27, 146.26, 139.6, 139.5, 137.9, 137.6, 136.2, 136.1, 135.2, 134.9, 134.5, 134.4, 134.1, 134.0, 131.82, 131.78, 129.5, 129.4, 128.3, 128.1, 124.1, 123.9, 60.3, 59.3, 38.83, 38.78, 34.74, 34.73, 34.4, 34.22, 34.17, 34.15, 34.12, 34.1, 34.0, 33.8, 32.99, 32.95, 32.8, 32.7, 31.7, 31.6, 31.5, 31.4, 27.9, 27.79, 27.76, 27.66, 27.51, 27.47, 27.43, 27.40, 26.58, 26.57, 20.5, 20.4, 20.3, 16.63, 16.60, 16.2, 13.3, 13.2 (Observed complexity due to C-P splitting).  $^{31}\text{P}$  NMR (162 MHz,  $\text{CDCl}_3$ )  $\delta$ : 6.6, 4.5. **IR** (neat  $\text{cm}^{-1}$ ) 2923, 2847, 1446, 1374, 1214, 1083, 1001, 885, 851, 630. **Anal.** Calcd. for  $\text{C}_{40}\text{H}_{63}\text{OP}$ : C, 81.30; H, 10.75; Found: C, 81.45; H, 10.91.

**Preparations of Palladacycle Precatalyst (3a, 3b):**

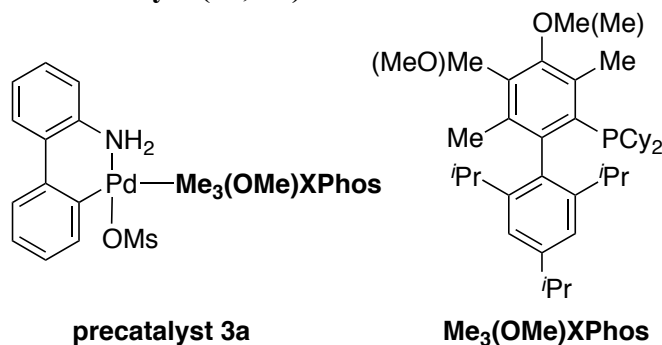

**Palladacycle Precatalyst 3a.** An oven-dried 100 mL round-bottomed flask equipped with a Teflon-coated magnetic stir bar and capped with a rubber septum was charged with Pd  $\mu$ -OMs dimer (**S1**) (1.60 g, 2.16 mmol, 0.5 equiv) and **L6** (2.38 g, 4.33 mmol, 1.0 equiv). The flask was evacuated and backfilled

with argon (this sequence was repeated a total of three times), and THF (20 mL) was added into the flask via syringe. The reaction mixture was then stirred at room temperature for 1.5 h. The reaction mixture was concentrated *in vacuo* to give crude solid residue with the aid of a rotary evaporator. The residue was dissolved with ethyl acetate (~5 mL) followed by the addition of pentane (~20 mL). The solid that formed was triturated with the aid of an ultrasonic water-bath at room temperature. The resulting solid was filtered, washed with pentane, and dried *in vacuo* to afford a brownish-yellow solid **3a** (3.77 g, 4.10 mmol, 95%). **<sup>1</sup>H NMR** (400 MHz, CDCl<sub>3</sub>) δ: 7.62-7.61 (m, 1 H), 7.38-7.36 (m, 1 H), 7.33-7.29 (ovrlp, 2 H), 7.16-7.07 (ovrlp, 5 H), 6.84-6.82 (m, 1 H), 6.77-6.71 (m, 1 H), 3.75 (s, 1.8 H), 3.64 (s, 1.2 H), 3.49 (sep, *J* = 6.8 Hz, 1 H), 3.02-2.90 (m, 1 H), 2.73 (sep, *J* = 6.8 Hz, 1 H), 2.45 (s, 1.8 H), 2.41 (s, 1.2 H), 2.35-2.17 (ovrlp, 7 H), 2.00-1.81 (ovrlp, 8 H), 1.72-1.49 (ovrlp, 10 H), 1.42-1.20 (ovrlp, 8 H), 1.15-1.07 (ovrlp, 6 H), 1.00-0.68 (ovrlp, 11 H). **<sup>13</sup>C NMR** (100 MHz, CDCl<sub>3</sub>) δ: 160.1, 157.5, 157.4, 155.7, 155.5, 154.6, 154.3, 152.7, 152.6, 144.4, 144.2, 142.6, 142.3, 140.7, 140.5, 140.43, 140.39, 140.1, 139.9, 137.6, 137.5, 136.7, 135.1, 133.8, 133.7, 132.7, 132.3, 131.9, 131.7, 131.6, 130.5, 130.4, 129.3, 129.0, 128.0, 127.8, 126.7, 126.33, 126.29, 125.6, 125.2, 123.1, 122.25, 122.21, 60.2, 59.6, 39.0, 37.2, 37.0, 36.9, 36.6, 35.8, 35.6, 34.09, 34.05, 33.7, 33.34, 33.27, 33.1, 30.8, 29.6, 29.4, 29.1, 28.0, 27.9, 27.5, 27.0, 26.9, 26.2, 25.8, 25.7, 25.6, 25.4, 24.7, 24.6, 24.4, 22.3, 21.7, 18.5, 17.2, 14.2, 14.0 (Observed complexity due to C-P splitting). **<sup>31</sup>P NMR** (162 MHz, CDCl<sub>3</sub>) δ: 41.5, 41.2. **IR** (neat cm<sup>-1</sup>) 2955, 2924, 2849, 1460, 1384, 1238, 1145, 1085, 1031, 1002, 730. **HRMS** (ESI) Calcd for C<sub>50</sub>H<sub>70</sub>NO<sub>4</sub>PPdS [M-OMs]: 822.4010; Found: 822.4001.

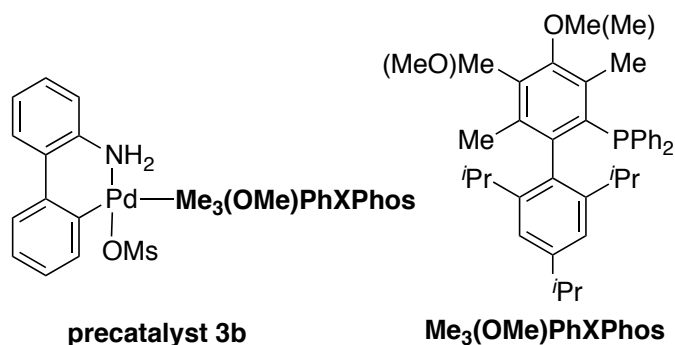

**Palladacycle Precatalyst 3b.** The procedure to prepare **3a** was employed, except that an oven-dried 25 mL re-sealable screw-cap test tube, Pd  $\mu$ -OMs dimer (**S1**) (380 mg, 0.51 mmol, 0.5 equiv), **L7** (552 mg, 1.03 mmol, 1.0 equiv), and THF (10 mL) were used. The reaction mixture was then stirred at room temperature for 4 h. A brownish-yellow solid of **3b** (825 mg, 0.91 mmol, 88%) was obtained. **<sup>1</sup>H NMR** (400 MHz, CDCl<sub>3</sub>) δ: 7.61 (s, 1 H), 7.58-7.53 (m, 1 H), 7.47-7.44 (m, 2 H), 7.36-7.26 (ovrlp, 4 H), 7.23-7.14 (ovrlp, 4 H), 7.05-6.95 (ovrlp, 3 H), 6.90-6.83 (ovrlp, 2 H), 6.00-5.93 (m, 1 H), 3.73 (1.3 H), 3.69 (1.7 H), 3.46 (sep, *J* = 6.8 Hz, 1 H), 2.89-2.82 (m, 1 H), 2.35 (s, 3 H), 2.67 (s, 1.7 H), 2.22 (s, 1.3 H), 2.01 (sep, *J* = 6.8 Hz, 1H), 1.94-1.90 (ovrlp, 3 H), 1.70-1.69 (ovrlp, 3 H), 1.53-1.49 (ovrlp, 6 H), 1.36-1.25 (ovrlp, 3 H), 1.23-1.18 (ovrlp, 4 H), 0.77-0.73 (ovrlp, 3 H), (-0.20)-(-0.23) (ovrlp, 3 H). **<sup>13</sup>C NMR** (100 MHz, CDCl<sub>3</sub>) δ: 161.29, 161.27, 157.9, 157.8, 154.5, 154.3, 152.5, 152.2, 150.9, 145.1, 144.91, 144.88, 144.8, 144.7, 144.6, 141.6, 141.2, 141.0, 139.4, 139.3, 138.7, 138.6, 137.1, 137.0, 136.89, 136.88, 136.86, 136.85, 136.83, 136.81, 135.84, 135.82, 135.8, 135.7, 134.2, 133.2, 133.09, 133.06, 133.0, 132.74, 132.67, 133.2, 133.09, 133.06, 133.0, 132.74, 132.67, 131.31, 131.29, 131.2, 131.1, 131.04, 130.99, 130.96, 130.89, 130.86, 130.80, 130.3, 130.1, 130.0, 129.6, 129.51, 129.48, 129.45, 129.4, 129.3, 129.1, 128.82, 128.79, 128.71, 128.69, 128.4, 127.9, 127.6, 126.8, 126.6, 126.50, 126.48, 125.7, 125.42, 125.35, 125.2, 125.1, 124.8, 123.23, 123.18, 122.7, 122.6, 121.82, 121.77, 120.2, 60.2,

59.9, 39.0, 33.9, 33.8, 33.0, 32.9, 31.53, 21.46, 26.4, 26.3, 24.60, 24.56, 24.48, 24.46, 24.43, 23.8, 22.6, 22.5, 21.12, 21.08, 17.8, 17.7, 16.6, 16.5, 13.8, 13.5, 13.2 (Observed complexity due to C-P splitting). <sup>31</sup>P NMR (162 MHz, CDCl<sub>3</sub>) δ: 29.5, 29.4. IR (neat cm<sup>-1</sup>) 2960, 1564, 1439, 1387, 1211, 1195, 1150, 1094, 1035, 1001, 884, 753, 701. HRMS (ESI) Calcd for C<sub>50</sub>H<sub>58</sub>NO<sub>4</sub>PPdS [M-OMs]: 810.3071; Found: 810.3054.

### Preparation of Heteroaryl Halides

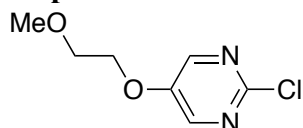

**2-Chloro-5-(2-methoxyethoxy)pyrimidine (S5).**<sup>11</sup> An oven-dried 25 mL re-sealable screw-cap test tube equipped with a Teflon-coated magnetic stir bar was charged with 2-chloro-5-hydroxypyrimidine (2.61 g, 20 mmol, 1.0 equiv), 1-bromo-2-methoxyethane (2.3 mL, 24 mmol, 1.2 equiv), potassium carbonate (3.59 g, 26 mmol, 1.3 equiv), and DMF (10 mL). The sealed tube was then stirred at 100 °C in an oil bath for 4 h. After cooling to room temperature, the reaction mixture was washed with water (200 mL) and EtOAc (50 mL). The aqueous layer was further extracted with EtOAc (2 x 50 mL). The combined organic fractions were concentrated *in vacuo* with the aid of a rotary evaporator. The residue was purified by flash column chromatography with silica gel using EtOAc / hexanes (1:1) as an eluent to give a white solid. The white solid was dissolved in EtOAc (~5 mL) and was then triturated with hexanes (~50 mL) to give a white solid. The white solid was filtered and dried *in vacuo* to afford 2-chloro-5-(2-methoxyethoxy)pyrimidine (**S6**) (2.36 g, 12.5 mmol, 63%). **m.p.:** 58-59 °C. <sup>1</sup>H NMR (400 MHz, CDCl<sub>3</sub>) δ: 8.35 (s, 2 H), 4.24 (t, *J* = 4.4 Hz, 2 H), 3.78 (t, *J* = 4.4 Hz, 2 H), 3.45 (s, 3 H). <sup>13</sup>C NMR (100 MHz, CDCl<sub>3</sub>) δ: 152.4, 152.2, 146.4, 70.6, 68.8, 59.3. IR (neat cm<sup>-1</sup>) 2939, 1574, 1550, 1407, 1379, 1278, 1197, 1118, 1034, 964, 915, 858, 757, 685, 630. **Anal.** Calcd. for C<sub>7</sub>H<sub>9</sub>ClN<sub>2</sub>O<sub>2</sub>: C, 44.58; H, 4.81; Found: C, 44.57; H, 4.82.

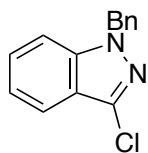

**1-Benzyl-3-chloro-1H-indazole (S6).** A 100 mL conical flask (**A**) equipped with a Teflon-coated magnetic stir bar and capped with a rubber septum was charged with 3-chloro-1H-indazole (2.30 g, 15 mmol, 1.0 equiv). Flask **A** was then evacuated and backfilled with argon (this sequence was repeated a total of three times), and THF (30 mL) was then added via syringe. The reaction mixture in flask **A** was then stirred at -78 °C for 15 min. Simultaneously, another 100 mL conical flask (**B**) capped with a rubber septum was charged with sodium hydride (NaH) (654 mg, 27 mmol, 1.8 equiv). Flask **B** was then evacuated and backfilled with argon (this sequence was repeated a total of three times), and THF (20 mL) was then added via syringe to form a slurry NaH suspension. The NaH suspension from flask **B** was slowly transferred into flask **A** at -78 °C via syringe, and the reaction mixture in flask **A** was further stirred at -78 °C for 15 min. Benzyl bromide (2.2 mL, 18 mmol, 1.2 equiv) was added into flask **A** via syringe, and the reaction mixture was gradually allowed to warm to room temperature and further stirred overnight. The reaction mixture was concentrated *in vacuo* with the aid of a rotary evaporator, and the

residue was then washed with water (100 mL) and EtOAc (30 mL). The aqueous layer was further extracted with EtOAc (2 x 30 mL). The combined organic fractions were concentrated *in vacuo* with the aid of a rotary evaporator. The residue was purified by flash column chromatography with silica gel using EtOAc / hexanes (1:10) as an eluent to afford 1-benzyl-3-chloro-1*H*-indazole (**S4**) (2.40 g, 9.9 mmol, 66%) as a yellow, low-melting solid.  $^1\text{H NMR}$  (400 MHz,  $\text{CDCl}_3$ )  $\delta$ : 7.65 (dt,  $J = 8.0$  Hz,  $J = 1.2$  Hz, 1 H), 7.33 (ddd,  $J = 8.4$  Hz,  $J = 6.8$  Hz,  $J = 1.2$  Hz, 1 H), 7.29-7.18 (ovrlp, 6 H), 7.15 (ddd,  $J = 8.0$  Hz,  $J = 6.8$  Hz,  $J = 1.2$  Hz, 1 H), 5.48 (s, 2 H).  $^{13}\text{C NMR}$  (100 MHz,  $\text{CDCl}_3$ )  $\delta$ : 140.9, 136.3, 133.2, 128.9, 128.0, 127.7, 127.3, 121.5, 121.4, 119.9, 109.7, 53.4. **IR** (neat  $\text{cm}^{-1}$ ) 1616, 1495, 1467, 1336, 1257, 1178, 1005, 764, 728, 693, 651. **HRMS** (ESI) Calcd for  $\text{C}_{14}\text{H}_{11}\text{ClN}_2$  [ $\text{M}+\text{H}$ ]: 243.0648; Found: 243.0649.

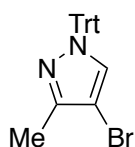

**4-Bromo-3-methyl-1-trityl-1*H*-pyrazole (S7)**. An oven-dried 100 mL round-bottom flask tube equipped with a Teflon-coated magnetic stir bar was charged with 4-bromo-3-methyl-1*H*-pyrazole (860 mg, 5.34 mmol, 1.0 equiv), trityl chloride (2.23 g, 8.01 mmol, 1.5 equiv), triethylamine (2.2 mL, 16.0 mmol, 3 equiv), and chloroform (30 mL). The reaction mixture was then stirred overnight at room temperature. The reaction mixture was washed with hydrochloric acid solution (1 M, ~100 mL) and dichloromethane (~50 mL). The aqueous layer was further extracted with dichloromethane (2 x ~20 mL). The combined organic fractions were concentrated *in vacuo* with the aid of a rotary evaporator. The residue was dissolved with dichloromethane (~10 mL) and then triturated with methanol (~50 mL) to give an off-white solid. The solid was filtered and dried *in vacuo* to afford 4-bromo-3-methyl-1-trityl-1*H*-pyrazole (**S8**) (1.58 g, 3.92 mmol, 73%). **m.p.**: 180-181 °C.  $^1\text{H NMR}$  (400 MHz,  $\text{CDCl}_3$ )  $\delta$ : 7.31-7.29 (ovrlp, 9 H), 7.26 (s, 1 H), 7.15-7.12 (m, 6 H), 2.25 (s, 3 H).  $^{13}\text{C NMR}$  (100 MHz,  $\text{CDCl}_3$ )  $\delta$ : 147.9, 143.0, 132.9, 130.2, 127.9, 93.3, 78.9, 12.4. **IR** (neat  $\text{cm}^{-1}$ ) 1488, 1442, 1365, 1128, 1059, 902, 870, 747, 698, 666, 640. **Anal.** Calcd. for  $\text{C}_{23}\text{H}_{19}\text{BrN}_2$ : C, 68.49; H, 4.75; Found: C, 68.52; H, 4.71.

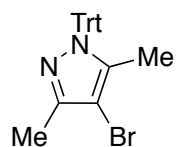

**4-Bromo-3,5-dimethyl-1-trityl-1*H*-pyrazole (S8)**. An oven-dried 100 mL round-bottom flask tube equipped with a Teflon-coated magnetic stir bar was charged with 4-bromo-3,5-dimethyl-1*H*-pyrazole (1.23 g, 7.0 mmol, 1.0 equiv), trityl chloride (2.54 g, 9.1 mmol, 1.3 equiv), potassium *tert*-butoxide (1.18 g, 10.5 mmol, 1.5 equiv), and DMF (20 mL). The reaction mixture was then stirred overnight at room temperature. The reaction mixture was washed with deionized water (~200 mL) and dichloromethane (~50 mL). The aqueous layer was further extracted with dichloromethane (2 x ~20 mL). The combined organic fractions were concentrated *in vacuo* with the aid of a rotary evaporator. The residue was dissolved with dichloromethane (~10 mL) and then triturated with methanol (~50 mL) to give an off-white solid. The solid was filtered and dried *in vacuo* to afford 4-bromo-3,5-dimethyl-1-trityl-1*H*-pyrazole (**S9**) (2.22 g, 5.32 mmol, 71%). **m.p.**: 207-208 °C.  $^1\text{H NMR}$  (400 MHz,  $\text{CDCl}_3$ )  $\delta$ : 7.28-7.25 (ovrlp, 9 H), 7.11-7.09 (m, 6 H), 2.19 (s, 3 H), 1.50 (s, 3 H).  $^{13}\text{C NMR}$  (100 MHz,  $\text{CDCl}_3$ )  $\delta$ : 144.3, 142.9, 139.5, 130.4, 127.6, 127.4, 97.2, 79.0, 13.9, 13.0. **IR** (neat  $\text{cm}^{-1}$ ) 1492, 1444, 1344, 1227,

1068, 1032, 892, 753, 741, 697. **Anal.** Calcd. for C<sub>15</sub>H<sub>12</sub>N<sub>2</sub>O<sub>3</sub>: C, 69.07; H, 5.07; Found: C, 68.90; H, 5.26.

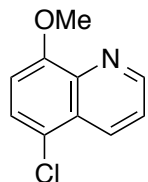

**5-chloro-8-methoxyquinoline (S9).** An oven-dried 250 mL round-bottom flask tube equipped with a Teflon-coated magnetic stir bar was charged with 5-chloro-8-hydroxyquinoline (4.74 g, 26.4 mmol, 1.0 equiv), granulated potassium hydroxide (2.22 g, 39.6 mmol, 1.5 equiv), dimethyl sulfate (9.99 g, 7.5 mL, 79.2 mmol, 3.0 equiv), deionized water (6 mL), and DMF (100 mL). The reaction mixture was then stirred overnight at room temperature. The reaction mixture was washed with deionized water (~200 mL) and EtOAc (~50 mL). The aqueous layer was further extracted with EtOAc (2 x ~20 mL). The combined organic fractions were concentrated *in vacuo* with the aid of a rotary evaporator. The residue was purified by flash column chromatography with silica gel using EtOAc / hexanes (8:1) and then EtOAc as eluents to afford 5-chloro-8-methoxyquinoline (**S9**) (2.79 g, 14.4 mmol, 55%) as an off-white solid. <sup>1</sup>H NMR (400 MHz, CDCl<sub>3</sub>) δ: 8.95 (dd, *J* = 4.0 Hz, *J* = 1.6 Hz, 1 H), 8.46 (dd, *J* = 8.4 Hz, *J* = 1.2 Hz, 1 H), 7.50 (dd, *J* = 8.4 Hz, *J* = 4.0 Hz, 1 H), 7.46 (d, *J* = 8.4 Hz, 1 H), 6.90 (d, *J* = 8.4 Hz, 1 H), 4.05 (s, 3 H). <sup>13</sup>C NMR (100 MHz, CDCl<sub>3</sub>) δ: 154.4, 149.5, 140.4, 132.7, 126.7, 126.2, 122.2, 121.9, 107.2, 56.0. **HRMS** (ESI) Calcd for C<sub>10</sub>H<sub>8</sub>ClNO [M+H]: 194.0367. Found: 194.0359.

**Optimization of Ligand for General Selective Palladium-Catalyzed Arylation of Ammonia (Table 1).** An oven-dried 20 mL re-sealable screw-cap test tube equipped with a Teflon-coated magnetic stir bar was charged with Pd<sub>2</sub>dba<sub>3</sub> (4.6 mg, 0.005 mmol, 0.010 equiv), ligand (0.025 mmol, 0.050 equiv), and sodium *tert*-butoxide (67.3 mg, 0.70 mmol, 1.4 equiv). The tube was then evacuated and backfilled with argon (this sequence was repeated a total of three times). Chlorobenzene (51 μL, 0.50 mmol, 1.0 equiv), ammonia solution (0.5 M in 1,4-dioxane, 3.0 mL, 3.0 equiv), and 1,4-dioxane (1.0 mL) were added into the tube via syringe. The reaction mixture was then stirred in an oil bath at 80 °C for 5 h. After cooling to room temperature, ethyl acetate (~5 mL) and *n*-dodecane (55 μL, 0.25 mmol) were added into the reaction mixture. A small fraction of reaction mixture was filtered through a plug of silica gel and then subjected to GC analysis to determine the reaction conversion and the GC yields of aniline (**1**) and diphenylamine (**2**) using *n*-dodecane as internal standard.

#### **Comparison of the Performance of Palladium Sources on the Arylation of Ammonia (Table S1).**

**(A) With Pd<sub>2</sub>dba<sub>3</sub> without premixing with L6.** An oven-dried 15 mL re-sealable screw-cap test tube equipped with a Teflon-coated magnetic stir bar was charged with Pd<sub>2</sub>dba<sub>3</sub> (2.3 mg, 0.0025 mmol, 0.01 equiv), **L6** (5.5 mg, 0.01 mmol, 0.04 equiv), sodium *tert*-butoxide (33.6 mg, 0.35 mmol, 1.4 equiv), and (hetero)aryl halide (if solid) (0.25 mmol, 1.0 equiv). The tube was then evacuated and backfilled with argon (this sequence was repeated a total of three times). Ammonia solution (0.5 M in 1,4-dioxane, 1.5 mL, 3.0 equiv), 1,4-dioxane (1.0 mL), and (hetero)aryl halide (if liquid) (0.25 mmol, 1 equiv) were added into the tube via syringe. The tube was then stirred at the required temperature (50 or 80 °C) in an oil bath for 24 h. After cooling to room temperature, ethyl acetate (~4 mL) and 1,3,5-trimethoxybenzene



(14.0 mg, 0.083 mmol, 0.33 equiv) were added into the reaction mixture. A portion of the reaction mixture was concentrated *in vacuo* with the aid of a rotary evaporator to give crude product. The reaction conversions and the yield of arylamine product were determined by <sup>1</sup>H NMR spectroscopy using 1,3,5-trimethoxybenzene as internal standard.

**(B) With Pd<sub>2</sub>dba<sub>3</sub> with premixing with L6.** An oven-dried 15 mL re-sealable screw-cap test tube (**A**) equipped with a Teflon-coated magnetic stir bar was charged with heteroaryl halide (0.25 mmol, 1.0 equiv) and sodium *tert*-butoxide (33.6 mg, 0.35 mmol, 1.4 equiv). Tube **A** was then evacuated and backfilled with argon (this sequence was repeated a total of three times), and ammonia solution (0.5 M in 1,4-dioxane, 1.5 mL, 3.0 equiv) was then added into the tube via syringe. Simultaneously, an oven-dried 10 mL re-sealable screw-cap test tube (**B**) equipped with a Teflon-coated magnetic stir bar was charged with Pd<sub>2</sub>dba<sub>3</sub> (2.3 mg, 0.0025 mmol, 0.01 equiv) and L6 (5.5 mg, 0.01 mmol, 0.04 equiv). Tube **B** was evacuated and backfilled with argon (this sequence was repeated a total of three times), and 1,4-dioxane (1.0 mL) was then added into the tube. The reaction mixture in tube **B** was stirred at 100 °C in an oil bath for 3 min, after which time the color of the reaction mixture changed from deep purple to deep brown, indicating the formation of Pd-L6 catalyst. After cooling to room temperature, the solution of Pd-L6 from tube **B** was transferred into tube **A** via syringe. The reaction mixture in tube **A** was stirred in an oil bath at 50 °C for 24 h. After cooling to room temperature, ethyl acetate (~4 mL) and 1,3,5-trimethoxybenzene (14.0 mg, 0.083 mmol, 0.33 equiv) were added into the reaction mixture. A portion of the reaction mixture was concentrated *in vacuo* with the aid of a rotary evaporator to give crude product. The reaction conversion and the yield of arylamine products were determined by <sup>1</sup>H NMR spectroscopy using 1,3,5-trimethoxybenzene as internal standard.

**(C) With Pd precatalyst 3a.** An oven-dried 15 mL re-sealable screw-cap test tube (**A**) equipped with a Teflon-coated magnetic stir bar was charged with L6 (5.5 mg, 0.005 mmol, 0.02 equiv), sodium *tert*-butoxide (33.6 mg, 0.35 mmol, 1.4 equiv), and (hetero)aryl halide (if solid) (0.25 mmol, 1 equiv). Tube **A** was evacuated and backfilled with argon (this sequence was repeated a total of three times), and ammonia solution (0.5 M in 1,4-dioxane, 1.5 mL, 3.0 equiv) and (hetero)aryl halide (if liquid) (0.25 mmol, 1.0 equiv) were then added into the tube via syringe. Simultaneously, an oven-dried 10 mL re-sealable screw-cap test tube (**B**) equipped with a Teflon-coated magnetic stir bar was charged with **3a** (4.6 mg, 0.005 mmol, 0.02 equiv), and the tube was evacuated and backfilled with argon (this sequence was repeated a total of three times). 1,4-Dioxane (1.0 mL) was added into tube **B** via syringe, and the reaction mixture was then stirred at room temperature for ~1 min to form a homogeneous solution. The solution of **3a** from tube **B** was then transferred into tube **A** via syringe. The reaction mixture in tube **A** was then stirred at the required temperature (50 or 80 °C) in an oil bath for 24 h. After cooling to room temperature, ethyl acetate (~4 mL) and 1,3,5-trimethoxybenzene (14.0 mg, 0.083 mmol, 0.33 equiv) were added into the reaction mixture. A portion of the reaction mixture was concentrated *in vacuo* with the aid of a rotary evaporator to give crude product. The conversion and the yield of arylamine product were determined by <sup>1</sup>H NMR spectroscopy using 1,3,5-trimethoxybenzene as internal standard.

**Optimization of Ligand for Selective Palladium-Catalyzed Coupling of Ammonia with Sterically Hindered (Hetero)aryl Halides (Scheme S1).** An oven-dried 15 mL re-sealable screw-cap test tube equipped with a Teflon-coated magnetic stir bar was charged with Pd<sub>2</sub>dba<sub>3</sub> (2.3 mg, 0.0025 mmol, 0.01 equiv), ligand (L6 or L7; 0.01 mmol, 0.04 equiv), and sodium *tert*-butoxide (33.6 mg, 0.35 mmol, 1.4 equiv), (and 5-chloro-8-methoxyquinoline as a solid (48.4 mg, 0.25 mmol, 1 equiv)). The tube was then

evacuated and backfilled with argon (this sequence was repeated a total of three times). Ammonia solution (0.5 M in 1,4-dioxane, 1.5 mL, 3.0 equiv) and 1,4-dioxane (1.0 mL) (and 2-chloro-1,3-xylene as a liquid (33  $\mu$ L, 0.25 mmol, 1.0 equiv)) were added into the tube via syringe. The reaction mixture was then stirred in an oil bath at 100 °C for 24 h. After cooling to room temperature, ethyl acetate (~4 mL) and 1,3,5-trimethoxybenzene (14.0 mg, 0.083 mmol, 0.33 equiv) were added into the reaction mixture. A portion of the reaction mixture was dried *in vacuo* with the aid of a rotary evaporator to give crude product. The yield of arylamine product and diarylamine side-product were determined by <sup>1</sup>H NMR spectroscopy using 1,3,5-trimethoxybenzene as internal standard.

**Optimization of Ligand for Selective Palladium-Catalyzed Coupling of Ammonia with Five-Membered Heteroaryl Halides (Scheme S1).** An oven-dried 15 mL re-sealable screw-cap test tube (**A**) equipped with a Teflon-coated magnetic stir bar was charged with 1-(4-fluorophenyl)-4-bromopyrazole (60.3 mg, 0.25 mmol, 1.0 equiv) and sodium *tert*-butoxide (33.6 mg, 0.35 mmol, 1.4 equiv). Tube **A** was evacuated and backfilled with argon (this sequence was repeated a total of three times), and ammonia solution (0.5 M in 1,4-dioxane, 1.5 mL, 3.0 equiv) was then added into tube **A** via syringe. Simultaneously, an oven-dried 10 mL re-sealable screw-cap test tube (**B**) equipped with a Teflon-coated magnetic stir bar was charged with Pd<sub>2</sub>dba<sub>3</sub> (2.3 mg, 0.0025 mmol, 0.01 equiv) and ligand (**L3**, **L4**, or **L6**; 0.01 mmol, 0.04 equiv). Tube **B** was evacuated and backfilled with argon (this sequence was repeated a total of three times), and 1,4-dioxane (1.0 mL) was then added into tube **B** via syringe. The reaction mixture in tube **B** was stirred at 100 °C in an oil bath for 3 min, after which time the color of the reaction mixture changed from dark purple to deep brown, indicating the formation of Pd-L catalyst. After cooling to room temperature, the deep brown Pd-L solution from tube **B** was transferred into tube **A** via syringe. The reaction mixture in tube **A** was then stirred in an oil bath at 120 °C for 20 h. After cooling to room temperature, ethyl acetate (~4 mL) and 1,3,5-trimethoxybenzene (14.0 mg, 0.083 mmol, 0.033 mmol) were added into the reaction mixture. A portion of the reaction mixture was concentrated *in vacuo* with the aid of a rotary evaporator to give crude product. The reaction conversion and the yield of arylamine product were determined by <sup>1</sup>H NMR spectroscopy using 1,3,5-trimethoxybenzene as internal standard.

**Substrate Scope for the Selective Palladium-Catalyzed Arylation of Ammonia for the Synthesis of Arylamines (Schemes 2-5).**

**General Procedure A (For General Use):** An oven-dried 25 mL re-sealable screw-cap test tube (**A**) equipped with a Teflon-coated magnetic stir bar was charged with **L6** (11.0 mg, 0.020 mmol, 0.020 equiv), sodium *tert*-butoxide (134.5 mg, 1.4 mmol, 1.4 equiv), and (hetero)aryl halide (if solid) (1.0 mmol, 1.0 equiv). Tube **A** was then evacuated and backfilled with argon (this sequence was repeated a total of three times), and ammonia solution (0.5 M in 1,4-dioxane, 6.0 mL, 3.0 mmol, 3.0 equiv) and (hetero)aryl halide (if liquid) (1.0 mmol, 1.0 equiv) were then added into the tube via syringe. Simultaneously, an oven-dried 10 mL re-sealable screw-cap test tube (**B**) equipped with a Teflon-coated magnetic stir bar was charged with Pd precatalyst **3a** (18.4 mg, 0.020 mmol, 0.020 equiv). Tube **B** was evacuated and backfilled with argon (this sequence was repeated a total of three times), and 1,4-dioxane (4.0 mL) was added into the tube via syringe. The reaction mixture in tube **B** was stirred at room temperature for ~1 min to form a homogeneous solution. The solution of **3a** from tube **B** was then transferred into tube **A** via syringe. The reaction mixture in tube **A** was stirred at an elevated temperature in an oil bath for 24 h. After cooling to room temperature, the crude product was diluted with ethyl acetate (~20 mL) and concentrated *in vacuo* with the aid of a rotary evaporator. The crude product

residue was purified by flash column chromatography with silica gel or alumina using a solvent mixture (ethyl acetate (EtOAc), hexanes, and/or methanol (MeOH)) as an eluent to afford the isolated arylamine product. The reported yields are of isolated products and averages of two runs.

**General Procedure B (For Sterically Hindered (Hetero)aryl Halides):** An oven-dried 25 mL re-sealable screw-cap test tube (**A**) equipped with a Teflon-coated magnetic stir bar was charged with **L7** (10.7 mg, 0.02 mmol, 0.020 equiv), sodium *tert*-butoxide (134.5 mg, 1.4 mmol, 1.4 equiv), and (hetero)aryl halide (if solid) (1.0 mmol, 1.0 equiv). Tube **A** was evacuated and backfilled with argon (this sequence was repeated a total of three times), and ammonia solution (0.5 M in 1,4-dioxane, 6.0 mL, 3.0 mmol, 3.0 equiv) and (hetero)aryl halide (if liquid) (1.0 mmol, 1.0 equiv) were then added in the tube via syringe. Simultaneously, an oven-dried 10 mL re-sealable screw-cap test tube (**B**) equipped with a Teflon-coated magnetic stir bar was charged with Pd precatalyst **3b** (18.1 mg, 0.020 mmol, 0.020 equiv). Tube **B** was evacuated and backfilled with argon (this sequence was repeated a total of three times), and 1,4-dioxane (4.0 mL) was added into the tube via syringe. The reaction mixture in tube **B** was stirred at room temperature for ~1 min to form a homogeneous solution. The solution of **3b** from tube **B** was then transferred into tube **A** via syringe. The reaction mixture in tube **A** was stirred at an elevated temperature in an oil bath for 24 h. After cooling to room temperature, the crude product was diluted with ethyl acetate (~20 mL) and concentrated *in vacuo* with the aid of a rotary evaporator. The crude product residue was purified by flash column chromatography with silica gel or alumina using a solvent mixture (ethyl acetate (EtOAc), hexanes, and/or methanol (MeOH)) as an eluent to afford the isolated arylamine product. The reported yields are of isolated products and averages of two runs.

**General Procedure C (For Five-Membered Heteroaryl Halides):** An oven-dried 25 mL re-sealable screw-cap test tube (**A**) equipped with a Teflon-coated magnetic stir bar was charged with **L4** (12.8 mg, 0.020 mmol, 0.020 equiv), sodium *tert*-butoxide (134.5 mg, 1.4 mmol, 1.4 equiv), and (hetero)aryl halide (if solid) (1.0 mmol, 1.0 equiv). Tube **A** was evacuated and backfilled with argon (this sequence was repeated a total of three times), and ammonia solution (0.5 M in 1,4-dioxane, 6.0 mL, 3.0 mmol, 3.0 equiv) and (hetero)aryl halide (if liquid) (1.0 mmol, 1.0 equiv) were then added into the tube via syringe. Simultaneously, an oven-dried 10 mL re-sealable screw-cap test tube (**B**) was charged with Pd precatalyst **3c** (20.2 mg, 0.02 mmol, 0.02 equiv). Tube **B** was evacuated and backfilled with argon (this sequence was repeated a total of three times), and 1,4-dioxane (4.0 mL) was then added into the tube via syringe. The reaction mixture in tube **B** was shaken with the aid of an ultrasonic water-bath at room temperature until all **3c** dissolved to form a clear solution. The solution of **3c** from tube **B** was then transferred into tube **A** via syringe. The reaction mixture in tube **A** was stirred at an elevated temperature in an oil bath for 20-24 h. After cooling to room temperature, the crude product was diluted with ethyl acetate (~20 mL) and concentrated *in vacuo* with the aid of a rotary evaporator. The crude product residue was then purified by flash column chromatography with silica gel or alumina using a solvent mixture (ethyl acetate (EtOAc), hexanes, and/or methanol (MeOH)) as an eluent to afford the isolated arylamine product. The reported yields are of isolated products and averages of two runs.

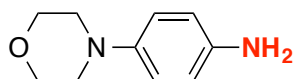

**4-Morpholinoaniline (4a).**<sup>12</sup> Following the general procedure A, the title compound was prepared using 4-(4-chlorophenyl)morpholine (197.7 mg, 1.0 mmol), Pd precatalyst **3a** (23.0 mg, 0.025 mmol), and **L6** (13.7 mg, 0.025 mmol) at 60 °C. After work up the crude product was purified by flash chromatography with silica gel using EtOAc as an eluent to afford an inseparable brown solid mixture of 4-

morpholinoaniline (**4a**) (143 mg, 0.80 mmol, 80%) and bis(4-morpholinophenyl)amine (**4a'**) (4%) The 1° : 2° ratio was determined to be 22 : 1 in the isolated product mixture. <sup>1</sup>H NMR (1°) (400 MHz, CDCl<sub>3</sub>) δ: 6.77 (d, *J* = 8.8 Hz, 2 H), 6.62 (d, *J* = 8.4 Hz, 2 H), 3.82 (t, *J* = 4.8 Hz, 4 H), 3.46 (br s, 2 H), 2.99 (t, *J* = 4.8 Hz, 4 H). <sup>13</sup>C NMR (1°) (100 MHz, CDCl<sub>3</sub>) δ: 144.4, 140.4, 118.2, 116.3, 67.1, 51.1. IR (neat cm<sup>-1</sup>) 3382, 3325, 3223, 2854, 1642, 1511, 1447, 1260, 1227, 1167, 1107, 1061, 916, 827, 765, 718. HRMS (ESI) Calcd for C<sub>10</sub>H<sub>14</sub>N<sub>2</sub>O [M+H] (1°): 179.1179; Found: 179.1174; Calcd for C<sub>20</sub>H<sub>25</sub>N<sub>3</sub>O<sub>2</sub> [M+H] (2°): 340.2020; Found: 340.2042.

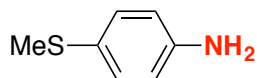

#### 4-(Methylthio)aniline (**4b**).<sup>13</sup>

(i) 50 °C. Following the general procedure A, the title compound was prepared using 1-chloro-4-(methylthio)benzene (158.7 mg, 130 μL 1.0 mmol) at 50 °C. After work up the crude product was purified by flash chromatography with silica gel using EtOAc / hexanes (1:3) as an eluent to afford 4-(methylthio)aniline (**4b**) (130.3 mg, 0.94 mmol, 94%) as a brown oil. <sup>1</sup>H NMR (400 MHz, CDCl<sub>3</sub>) δ: 7.14 (d, *J* = 7.2 Hz, 2 H), 6.56 (d, *J* = 7.2 Hz, 2 H), 3.65 (br s, 2 H), 2.37 (s, 3 H). <sup>13</sup>C NMR (100 MHz, CDCl<sub>3</sub>) δ: 145.1, 130.8, 125.4, 115.6, 18.6. IR (neat cm<sup>-1</sup>) 3345, 1618, 1597, 1494, 1422, 1275, 967, 817, 683. Anal. Calcd. for C<sub>7</sub>H<sub>9</sub>NS: C, 60.39; H, 6.52; Found: C, 60.38; H, 6.62.

(ii) rt. Following the general procedure A, the title compound was prepared using 1-bromo-4-(methylthio)benzene (101.6 mg, 0.50 mmol) **3a** (23.0 mg, 0.025 mmol, 5 mol %), **L6** (13.7 mg, 0.025 mmol, 5 mol %), NaO<sup>t</sup>Bu (67.3 mg, 0.70 mmol), ammonia solution (0.5 M in 1,4-dioxane, 3.0 mL), and 1,4-dioxane (0.50 mL) at room temperature for 36 h. After work up the crude product was purified by flash chromatography with silica gel using EtOAc / hexanes (1:3) as an eluent to afford 4-(methylthio)aniline (**4b**) (56.6 mg, 0.41 mmol, 81%) as a brown oil. The reaction conversion was determined to be ~80% by <sup>1</sup>H NMR spectroscopy of the crude reaction mixture. Spectral and analytical data were identical to those reported for the same compound above.

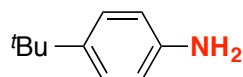

4-(*tert*-Butyl)aniline (**4c**).<sup>14</sup> Following the general procedure A, the title compound was prepared using 1-(*tert*-butyl)-4-chlorobenzene (168.7 mg, 167 μL, 1.0 mmol) at 60 °C. After work up the crude product was purified by flash chromatography with silica gel using EtOAc / hexanes (1:3) as an eluent to afford 4-(*tert*-butyl)aniline (**4c**) (126.8 mg, 0.85 mmol, 85%) as a brown oil. <sup>1</sup>H NMR (400 MHz, CDCl<sub>3</sub>) δ: 7.16 (d, *J* = 8.0 Hz, 2 H), 6.60 (d, *J* = 8.0 Hz, 2 H), 3.49 (br s, 2 H), 1.27 (s, 9 H). <sup>13</sup>C NMR (100 MHz, CDCl<sub>3</sub>) δ: 143.9, 141.3, 126.1, 115.0, 33.9, 31.6. IR (neat cm<sup>-1</sup>) 3350, 2957, 2903, 2866, 1623, 1515, 1363, 1265, 1189, 825, 643. HRMS (ESI) Calcd for C<sub>10</sub>H<sub>15</sub>N [M+H]: 150.1277; Found: 150.1286.

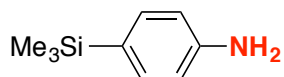

4-(Trimethylsilyl)aniline (**4d**).<sup>15</sup> Following the general procedure A, the title compound was prepared using (4-chlorophenyl)trimethylsilane (184.7 mg, 186 μL 1.0 mmol) at 80 °C. After work up the crude product was purified by flash chromatography with silica gel using EtOAc / hexanes (1:4) as an eluent to afford 4-(trimethylsilyl)aniline (**4d**) (151.5 mg, 0.92 mmol, 92%) as a brown oil. <sup>1</sup>H NMR (400 MHz, CDCl<sub>3</sub>) δ: 7.30 (d, *J* = 8.4 Hz, 2 H), 6.66 (d, *J* = 8.0 Hz, 2 H), 3.65 (br s, 2 H), 0.22 (s, 9 H). <sup>13</sup>C NMR (100 MHz, CDCl<sub>3</sub>) δ: 147.2, 134.7, 128.4, 114.7, -0.77. IR (neat cm<sup>-1</sup>) 3375, 2953, 1597, 1498, 1617, 1247, 1111, 898, 835, 713. HRMS (ESI) Calcd for C<sub>9</sub>H<sub>15</sub>NSi [M+H]: 166.1047; Found: 166.1049.

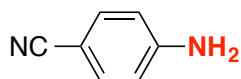

**4-Aminobenzonitrile (4e).**<sup>13</sup> Following the general procedure A, the title compound was prepared using 4-chlorobenzonitrile (137.6 mg, 1.0 mmol) at 60 °C. After work up the crude product was purified by flash chromatography with silica gel using EtOAc / hexanes (1:1) as an eluent to afford 4-aminobenzonitrile (**4e**) (86.7 mg, 0.74 mmol, 74%) as a pale-brown solid. **m.p.:** 82-84 °C (lit: 82-84 °C).<sup>16</sup> **<sup>1</sup>H NMR** (400 MHz, CDCl<sub>3</sub>) δ: 7.38 (dd, *J* = 8.4 Hz, *J* = 1.6 Hz, 2 H), 6.64 (dd, *J* = 8.8 Hz, *J* = 1.6 Hz, 2 H), 4.36 (br s, 2 H). **<sup>13</sup>C NMR** (100 MHz, CDCl<sub>3</sub>) δ: 150.8, 133.7, 120.4, 114.3, 99.3. **IR** (neat cm<sup>-1</sup>) 3447, 3344, 2220, 1629, 1599, 1512, 1310, 1171, 830, 699. **HRMS** (ESI) Calcd for C<sub>7</sub>H<sub>6</sub>N<sub>2</sub> [M+H]: 119.0604; Found: 119.0605.

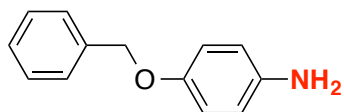

**4-(Benzyloxy)aniline (4f).**<sup>17</sup> Following the general procedure A, the title compound was prepared using 1-(benzyloxy)-4-bromobenzene (131.6 mg, 0.50 mmol) **3a** (23.0 mg, 0.025 mmol, 5 mol %), **L6** (13.7 mg, 0.025 mmol, 5 mol %), NaO<sup>t</sup>Bu (67.3 mg, 0.70 mmol), ammonia solution (0.5 M in 1,4-dioxane, 3.0 mL), and 1,4-dioxane (0.50 mL) at room temperature for 36 hours. After work up the crude product was purified by flash chromatography with silica gel using EtOAc / hexanes (1:2) and then EtOAc / hexanes (2:1) as eluents to afford 4-(benzyloxy)aniline (**4b**) (83.5 mg, 0.84 mmol, 84%) as a deep-brown solid. The reaction conversion was determined to be ~90% by <sup>1</sup>H NMR spectroscopy of the crude reaction mixture. **m.p.:** 41-42 °C (lit: 45-46.5 °C).<sup>17</sup> **<sup>1</sup>H NMR** (400 MHz, CDCl<sub>3</sub>) δ: 7.40 (d, *J* = 7.2 Hz, 2 H), 7.35 (t, *J* = 7.2 Hz, 2 H), 7.28 (t, *J* = 7.2 Hz, 1 H), 6.79 (d, *J* = 8.8 Hz, 2 H), 6.60 (d, *J* = 8.8 Hz, 2 H), 4.96 (s, 2 H), 3.37 (s, 2 H). **<sup>13</sup>C NMR** (100 MHz, CDCl<sub>3</sub>) δ: 152.0, 140.3, 137.6, 128.6, 127.9, 127.6, 116.4, 116.1, 70.8. **IR** (neat cm<sup>-1</sup>) 3354, 3032, 1623, 1508, 1453, 1380, 1265, 1227, 1016, 822, 733, 696. **HRMS** (ESI) Calcd for C<sub>13</sub>H<sub>13</sub>NO [M+H]: 200.1070; Found: 200.1076.

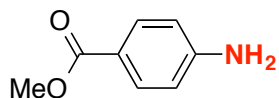

**Methyl 4-Aminobenzoate (4g).**<sup>13</sup> Following the general procedure A, the title compound was prepared using methyl 4-chlorobenzoate (170.6 mg, 1.0 mmol) at 50 °C. After work up the crude product was purified by flash chromatography with silica gel using EtOAc / hexanes (1:3) as an eluent to afford methyl 4-aminobenzoate (**4g**) (80.6 mg, 0.53 mmol, 53%) as an off-white solid. **m.p.:** 109 °C (lit: 112-113 °C).<sup>16</sup> **<sup>1</sup>H NMR** (400 MHz, CDCl<sub>3</sub>) δ: 7.84 (d, *J* = 8.0 Hz, 2 H), 6.62 (d, *J* = 8.0 Hz, 2 H), 4.16 (br s, 2 H), 3.84 (s, 3 H). **<sup>13</sup>C NMR** (100 MHz, CDCl<sub>3</sub>) δ: 167.3, 151.1, 131.6, 119.5, 113.8, 51.6. **IR** (neat cm<sup>-1</sup>) 3405, 3336, 3230, 1635, 1597, 1515, 1434, 1313, 1283, 1176, 1118, 768, 698. **Anal.** Calcd. for C<sub>8</sub>H<sub>9</sub>NO<sub>2</sub>: C, 63.56; H, 6.00; Found: C, 63.48; H, 6.02.

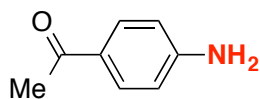

**4'-Aminoacetophenone (4h).**<sup>13</sup> Following the general procedure A, the title compound was prepared using 4'-chloroacetophenone (154.6 mg, 1.0 mmol) at 60 °C. After work up the crude product was purified by flash chromatography with silica gel using EtOAc / hexanes (1:1) as an eluent to afford 4'-aminoacetophenone (**4h**) (81.3 mg, 0.60 mmol, 60%) as a pale-yellow solid. **m.p.:** 104-106 °C (lit:

103-107 °C).<sup>18</sup> <sup>1</sup>H NMR (400 MHz, CDCl<sub>3</sub>) δ: 7.79 (d, *J* = 8.4 Hz, 2 H), 6.63 (d, *J* = 8.8 Hz, 2 H), 4.31 (br s, 2 H), 2.49 (s, 3 H). <sup>13</sup>C NMR (100 MHz, CDCl<sub>3</sub>) δ: 196.7, 151.5, 130.8, 127.6, 113.7, 26.1. IR (neat cm<sup>-1</sup>) 3388, 3325, 3221, 1650, 1637, 1585, 1564, 1514, 1436, 1359, 1304, 1279, 1177, 960, 836, 819. **Anal.** Calcd. for C<sub>8</sub>H<sub>9</sub>NO: C, 71.09; H, 6.71; Found: C, 70.94; H, 6.78.

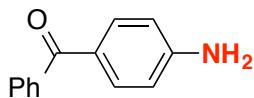

**4-Aminobenzophenone (4i).**<sup>13</sup>

(i) 50 °C. Following the general procedure A, the title compound was prepared using 4-chlorobenzophenone (216.7 mg, 1.0 mmol) at 50 °C. After work up the crude product was purified by flash chromatography with silica gel using EtOAc / hexanes (1:1) as an eluent to afford 4-aminobenzophenone (**4i**) (184.0 mg, 0.93 mmol, 93%) as a pale-yellow solid. **m.p.:** 122-123 °C (lit.: 121-124 °C).<sup>18</sup> <sup>1</sup>H NMR (400 MHz, CDCl<sub>3</sub>) δ: 7.71-7.67 (ovrlp, 4 H), 7.50 (t *J* = 7.6 Hz, 1 H), 7.42 (t, *J* = 8.0 Hz, 2 H), 6.61 (d, *J* = 8.4 Hz, 2 H), 4.37 (br s, 2 H). <sup>13</sup>C NMR (100 MHz, CDCl<sub>3</sub>) δ: 195.4, 151.5, 138.9, 132.9, 131.4, 129.4, 128.1, 126.9, 113.6. IR (neat cm<sup>-1</sup>) 3417, 3335, 3221, 1627, 1585, 1441, 1319, 1285, 1150, 937, 922, 794, 844, 756. **Anal.** Calcd. for C<sub>13</sub>H<sub>11</sub>NO: C, 79.16; H, 5.62; Found: C, 79.08; H, 5.70.

(ii) rt. Following the general procedure A, the title compound was prepared using 4-bromobenzophenone (130.6 mg, 0.50 mmol), **3a** (23.0 mg, 0.025 mmol, 5 mol %), **L6** (13.7 mg, 0.025 mmol, 5 mol %), NaO<sup>t</sup>Bu (67.3 mg, 0.70 mmol), ammonia solution (0.5 M in 1,4-dioxane, 3.0 mL), and 1,4-dioxane (0.50 mL) at room temperature for 36 hours. After work up the crude product was purified by flash chromatography with silica gel using EtOAc / hexanes (1:2) as an eluent to afford 4-aminobenzophenone (**4i**) (98.6 mg, 0.48 mmol, 96%) as a pale-yellow solid. Spectral and analytical data were identical to those reported for the same compound above.

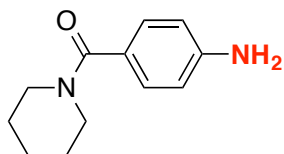

**(4-Aminophenyl)(piperidin-1-yl)methanone (4j).**<sup>19</sup> Following the general procedure A, the title compound was prepared using (4-chlorophenyl)(piperidin-1-yl)methanone (223.7 mg, 1.0 mmol) at 50 °C. After work up the crude product was purified by flash chromatography with silica gel using EtOAc as an eluent to afford (4-aminophenyl)(piperidin-1-yl)methanone (**4j**) (178.6 mg, 0.88 mmol, 88%) as an off-white solid. **m.p.:** 161-163 °C (lit.: 160 °C).<sup>19</sup> <sup>1</sup>H NMR (400 MHz, CDCl<sub>3</sub>) δ: 7.21 (d, *J* = 8.4 Hz, 2 H), 6.59 (d, *J* = 8.4 Hz, 2 H), 4.04 (br s, 2 H), 3.54 (br s, 4 H), 1.67-1.63 (m, 2 H), 1.57 (br s, 4 H). <sup>13</sup>C NMR (100 MHz, CDCl<sub>3</sub>) δ: 170.7, 148.3, 128.8, 125.1, 113.9, 25.9, 24.5. IR (neat cm<sup>-1</sup>) 3453, 3308, 3201, 2938, 1630, 1588, 1565, 1428, 1291, 1276, 1000, 845, 762. **Anal.** Calcd. for C<sub>12</sub>H<sub>16</sub>N<sub>2</sub>O: C, 70.56; H, 7.90; Found: C, 70.28; H, 7.84.

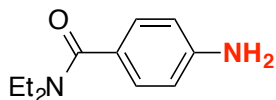

**4-Amino-N,N-diethylbenzamide (4k).**<sup>20</sup> Following the general procedure A, the title compound was prepared using 4-bromo-N,N-diethylbenzamide (128.1 mg, 0.50 mmol) **3a** (23.0 mg, 0.025 mmol, 5 mol %), **L6** (13.7 mg, 0.025 mmol, 5 mol %), NaO<sup>t</sup>Bu (67.3 mg, 0.70 mmol), ammonia solution (0.5 M

in 1,4-dioxane, 3.0 mL), and 1,4-dioxane (0.50 mL) at room temperature for 36 h. After work up the crude product was purified by flash chromatography with silica gel using EtOAc / hexanes (1:2) and then EtOAc as eluents to afford 4-amino-*N,N*-diethylbenzamide (**4k**) (90.0 mg, 0.47 mmol, 94%) as a pale-yellow solid. **m.p.**: 123-124 °C (lit.: 118-120 °C)<sup>20</sup> <sup>1</sup>H NMR (400 MHz, CDCl<sub>3</sub>) δ: 7.19 (d, *J* = 8.4 Hz, 2 H), 6.61 (d, *J* = 8.4 Hz, 2 H), 3.91 (br s, 2 H), 3.41 (br s, 4 H), 1.17 (t, *J* = 7.2 Hz, 6 H). <sup>13</sup>C NMR (100 MHz, CDCl<sub>3</sub>) δ: 171.8, 147.8, 128.2, 126.7, 114.2, 13.6. **IR** (neat cm<sup>-1</sup>) 3434, 3333, 2973, 1629, 1595, 1568, 1522, 1424, 1382, 1286, 1176, 1099, 836, 764. **HRMS** (ESI) Calcd for C<sub>11</sub>H<sub>16</sub>N<sub>2</sub>O [M+H]: 193.1335; Found: 193.1343.

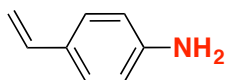

**4-Vinylaniline (4l).**<sup>21</sup> Following the general procedure A, the title compound was prepared using 1-chloro-4-vinylbenzene (138.6 mg, 126 μL, 1.0 mmol) at 80 °C. After work up the crude product was purified by flash chromatography with silica gel using EtOAc / hexanes (1:4) as an eluent to afford 4-vinylaniline (**4l**) (69.6 mg, 0.58 mmol, 58%) as a brown oil. A trace amount of bis(4-vinylphenyl)amine (**4l'**) formed as detected by GC/MS analysis of the crude reaction mixture based on 0.25 mmol aryl halide. <sup>1</sup>H NMR (400 MHz, CDCl<sub>3</sub>) δ: 7.21 (d, *J* = 8.4 Hz, 2 H), 6.64-6.57 (ovrlp, 3 H), 5.53 (d, *J* = 17.6 Hz, 1 H), 5.03 (d, *J* = 10.8 Hz, 1 H), 3.66 (br s, 2 H). <sup>13</sup>C NMR (100 MHz, CDCl<sub>3</sub>) δ: 146.3, 136.6, 128.4, 127.4, 115.1, 110.1. **IR** (neat cm<sup>-1</sup>) 3355, 1606, 1513, 1316, 1279, 1177, 989, 891, 824. **HRMS** (ESI) Calcd for C<sub>8</sub>H<sub>9</sub>N [M+H]: 120.0808; Found: 120.0809.

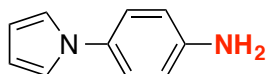

**4-(1*H*-Pyrrol-1-yl)aniline (4m).**<sup>22</sup> Following the general procedure A, the title compound was prepared using 1-(4-chlorophenyl)-1*H*-pyrrole (177.6 mg, 1.0 mmol), Pd precatalyst **3a** (6.4 mg, 0.007 mmol), **L6** (3.8 mg, 0.007 mmol), and 1,4-dioxane (6.0 mL) at 110 °C. After work up the crude product was purified by flash chromatography with silica gel using EtOAc / hexanes (1:6) and then EtOAc / hexanes (1:2) as eluents to afford 4-(1*H*-pyrrol-1-yl)aniline (**4m**) (142.6 mg, 0.90 mmol, 90%) as a pale-yellow solid. The 1° : 2° ratio was determined to be 9 : 1 in the crude product based on 0.25 mmol aryl halide. **m.p.**: 80 °C (lit.: 86-87 °C).<sup>22</sup> <sup>1</sup>H NMR (400 MHz, CDCl<sub>3</sub>) δ: 7.12 (d, *J* = 8.4 Hz, 2 H), 6.94 (t, *J* = 2.0 Hz, 2 H), 6.62 (d, *J* = 8.8 Hz, 2 H), 6.29 (t, *J* = 2.0 Hz, 2 H), 3.58 (br s, 2 H). <sup>13</sup>C NMR (100 MHz, CDCl<sub>3</sub>) δ: 144.6, 132.8, 122.3, 119.7, 115.6, 109.5. **IR** (neat cm<sup>-1</sup>) 3416, 3331, 3219, 1626, 1518, 1320, 1277, 1256, 1128, 1078, 1020, 922, 822, 721, 641. **Anal.** Calcd. for C<sub>10</sub>H<sub>10</sub>N<sub>2</sub>: C, 75.92; H, 6.37; Found: C, 75.86; H, 6.51.

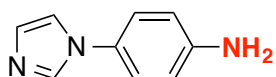

**4-(1*H*-imidazol-1-yl)aniline (4n).**<sup>23</sup> Following the general procedure A, the title compound was prepared using 1-(4-chlorophenyl)-1*H*-imidazole (178.6 mg, 1.0 mmol) at 80 °C. After work up the crude product was purified by flash chromatography with alumina using EtOAc (100%) and then EtOAc / MeOH (15:1) as eluents to afford 4-(1*H*-imidazol-1-yl)aniline (**4n**) (132.9 mg, 0.83 mmol, 83%) as a pale-yellow solid. **m.p.**: 143-144 °C (lit.: 145-146 °C).<sup>24</sup> <sup>1</sup>H NMR (400 MHz, CDCl<sub>3</sub>) δ: 7.72 (s, 1 H), 7.16 (ovrlp, 2 H), 7.13 (d, *J* = 8.8 Hz, 2 H), 6.72 (d, *J* = 8.8 Hz, 2 H), 3.94 (br s, 2 H). <sup>13</sup>C NMR (100 MHz, CDCl<sub>3</sub>) δ: 146.3, 135.9, 129.7, 128.6, 123.3, 118.9, 115.5. **IR** (neat cm<sup>-1</sup>) 3342, 3184, 3114, 1609, 1519, 1282, 1254, 1103, 1059, 909, 827, 741, 699, 663. **HRMS** (ESI) Calcd for C<sub>9</sub>H<sub>9</sub>N<sub>3</sub> [M+H]: 160.0869; Found: 160.0859.

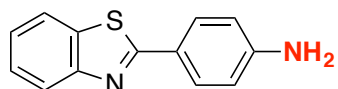

**4-(benzothiazol-2-yl)aniline (4o).**<sup>25</sup>

(i) **50 °C.** Following the general procedure A, the title compound was prepared using 2-(4-chlorophenyl)benzothiazole (245.7 mg, 1.0 mmol) at 50 °C. After work up the crude product was purified by flash chromatography with silica gel using EtOAc / hexanes (1:2) and then EtOAc / hexanes (1:1) as eluents to afford 4-(benzothiazol-2-yl)aniline (**4o**) (197.5 mg, 0.87 mmol, 87%) as a pale-yellow solid. **m.p.:** 155-156 °C (lit: 156-157 °C).<sup>25</sup> **<sup>1</sup>H NMR** (400 MHz, CDCl<sub>3</sub>) δ: 7.99 (d, *J* = 8.0 Hz, 1 H), 7.89 (d, *J* = 8.4 Hz, 2 H), 7.83 (d, *J* = 8.0 Hz, 1 H), 7.43 (t, *J* = 8.0 Hz, 1 H), 7.31 (t, *J* = 8.0 Hz, 1 H), 6.71 (d, *J* = 8.4 Hz, 2 H), 4.01 (br s, 2 H). **<sup>13</sup>C NMR** (100 MHz, CDCl<sub>3</sub>) δ: 168.6, 154.3, 149.4, 134.7, 129.2, 126.2, 124.5, 123.9, 122.5, 121.5, 114.8. **IR** (neat cm<sup>-1</sup>) 3450, 3292, 3184, 1627, 1604, 1471, 1432, 1309, 1228, 1178, 965, 826, 756, 728, 699. **HRMS** (ESI) Calcd for C<sub>13</sub>H<sub>10</sub>N<sub>2</sub>S [M+H]: 227.0637; Found: 227.0621.

(ii) **rt.** Following the general procedure A, the title compound was prepared using 2-(4-chlorophenyl)benzothiazole (122.9 mg, 0.50 mmol), **3a** (13.8 mg, 0.015 mmol, 3 mol %), **L6** (8.2 mg, 0.015 mmol, 3 mol %), NaO<sup>t</sup>Bu (67.3 mg, 0.70 mmol), ammonia solution (0.5 M in 1,4-dioxane, 3.0 mL), and 1,4-dioxane (0.50 mL) at room temperature. After work up the crude product was purified by flash chromatography with silica gel using EtOAc / hexanes (1:2) and then EtOAc / hexanes (1:1) as eluents to afford 4-(benzothiazol-2-yl)aniline (110.3 mg, 0.49 mmol, 97%) as a pale-yellow solid. Spectral and analytical data were identical to those reported for the same compound above.

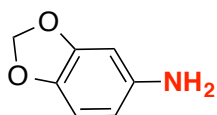

**5-Aminobenzo[1,3]dioxole (4p).**<sup>1</sup> Following the general procedure A, the title compound was prepared using 5-chlorobenzo[*d*][1,3]dioxole (156.6 mg, 117 μL, 1.0 mmol) at 80 °C. After work up the crude product was purified by flash chromatography with silica gel using EtOAc / hexanes (1:2) as an eluent to afford 5-aminobenzo[1,3]dioxole (**4p**) (113.2 mg, 0.83 mmol, 83%) as a low-melting, deep-brown solid. The 1° : 2° ratio was determined to be 13 : 1 in the crude product based on 0.25 mmol aryl halide. **<sup>1</sup>H NMR** (400 MHz, CDCl<sub>3</sub>) δ: 6.60 (d, *J* = 8.0 Hz, 1 H), 6.26 (d, *J* = 2.0 Hz, 1 H), 6.09 (dd, *J* = 8.0 Hz, *J* = 2.0 Hz, 1 H), 5.82 (s, 2 H), 3.47 (br s, 2 H). **<sup>13</sup>C NMR** (100 MHz, CDCl<sub>3</sub>) δ: 148.2, 141.5, 140.2, 108.6, 106.8, 100.6, 98.0. **IR** (neat cm<sup>-1</sup>) 3420, 3309, 3207, 2900, 1635, 1609, 1486, 1458, 1265, 1191, 1108, 1030, 942, 925, 831, 795, 667. **Anal.** Calcd. for C<sub>15</sub>H<sub>12</sub>N<sub>2</sub>O<sub>3</sub>: C, 61.31; H, 5.14; Found: Found: C, 61.61; H, 5.22.

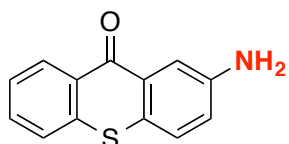

**2-amino-9H-thioxanthen-9-one (4q).**<sup>26</sup> Following the general procedure A, the title compound was prepared using 2-chloro-9H-thioxanthen-9-one (246.7 mg, 1.0 mmol) at 80 °C. After work up the crude product was purified by flash chromatography with silica gel using EtOAc / hexanes (1:3) and then EtOAc / hexanes (1:2) as eluents to afford 2-amino-9H-thioxanthen-9-one (**4q**) (182.2 mg, 0.80 mmol, 80%) as a sunset-yellow solid. **m.p.:** 226-228 °C (lit: 227-228 °C).<sup>26</sup> **<sup>1</sup>H NMR** (400 MHz, DMSO-*d*<sub>6</sub>) δ: 8.44 (d, *J* = 8.0 Hz, 1 H), 7.74-7.65 (ovrlp, 3 H), 7.51-7.47 (ovrlp, 2 H), 7.10 (dd, *J* = 8.4 Hz, *J* = 2.4 Hz,



1 H), 5.69 (br s, 2 H).  $^{13}\text{C}$  NMR (100 MHz, DMSO- $d_6$ )  $\delta$ : 178.7, 148.1, 137.2, 132.2, 129.4, 129.1, 127.9, 127.1, 126.4, 125.9, 122.1, 121.2, 110.9. IR (neat  $\text{cm}^{-1}$ ) 3425, 3339, 1616, 1587, 1481, 1436, 1323, 1166, 820, 733. Anal. Calcd. for  $\text{C}_{13}\text{H}_9\text{NOS}$ : C, 68.70; H, 3.99; Found: C, 68.76; H, 4.21.

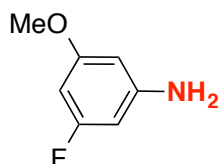

**3-Fluoro-5-methoxyaniline (4r).**<sup>1</sup> Following the general procedure A, the title compound was prepared using 1-chloro-3-fluoro-5-methoxybenzene (160.6 mg, 127  $\mu\text{L}$ , 1.0 mmol) at 50  $^\circ\text{C}$ . After work up the crude product was purified by flash chromatography with silica gel using EtOAc / hexanes (1:3) as an eluent to afford 3-fluoro-5-methoxyaniline (4r) (113.4 mg, 0.80 mmol, 80%) as a brown oil. The 1 $^\circ$  : 2 $^\circ$  ratio was determined to be 26 : 1 in the crude product based on 0.25 mmol aryl halide.  $^1\text{H}$  NMR (400 MHz,  $\text{CDCl}_3$ )  $\delta$ : 6.03 (dt,  $^3J_{\text{HF}} = 10.8$  Hz,  $^3J_{\text{HH}} = 2.4$  Hz, 1 H), 6.00-5.96 (ovrlp, 2 H), 2.77 (br s, 2 H), 3.71 (s, 3 H).  $^{13}\text{C}$  NMR (100 MHz,  $\text{CDCl}_3$ )  $\delta$ : 164.6 (d,  $^1J_{\text{CF}} = 239.9$  Hz), 161.8 (d,  $^3J_{\text{CF}} = 13.6$  Hz), 148.8 (d,  $^3J_{\text{CF}} = 13.5$  Hz), 96.6 (d,  $^4J_{\text{CF}} = 2.2$  Hz), 94.9 (d,  $^2J_{\text{CF}} = 25.0$  Hz), 91.8 (d,  $^2J_{\text{CF}} = 25.5$  Hz), 55.4. IR (neat  $\text{cm}^{-1}$ ) 3465, 3377, 1616, 1588, 1476, 1197, 1164, 1128, 1047, 1004, 943, 818, 675. Anal. Calcd. for  $\text{C}_7\text{H}_8\text{FNO}$ : C, 59.57; H, 5.71; Found: C, 59.80; H, 5.83.

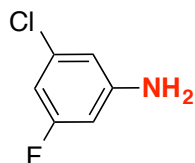

**3-Chloro-5-fluoroaniline (4s).** Following the general procedure A, the title compound was prepared using 1-bromo-3-chloro-5-fluorobenzene (209.4 mg, 122  $\mu\text{L}$ , 1.0 mmol) at 100  $^\circ\text{C}$ . After work up the crude product was purified by flash chromatography with silica gel using EtOAc / hexanes (1:5) and then EtOAc / hexanes (1:3) as eluents to afford 3-chloro-5-fluoroaniline (4s) (76.2 mg, 0.52 mmol, 52%) as a brown oil.  $^1\text{H}$  NMR (400 MHz,  $\text{CDCl}_3$ )  $\delta$ : 6.45 (d,  $^3J_{\text{HF}} = 8.8$  Hz, 1 H), 6.42 (s, 1 H), 6.24 (d,  $^3J_{\text{HF}} = 10.4$  Hz, 1 H), 3.83 (br s, 2 H).  $^{13}\text{C}$  NMR (100 MHz,  $\text{CDCl}_3$ )  $\delta$ : 163.7 (d,  $^1J_{\text{CF}} = 244.4$  Hz), 148.8 (d,  $^3J_{\text{CF}} = 12.1$  Hz), 135.5 (d,  $^3J_{\text{CF}} = 13.3$  Hz), 110.9 (d,  $^4J_{\text{CF}} = 2.7$  Hz), 106.0 (d,  $^2J_{\text{CF}} = 25.2$  Hz), 100.4 (d,  $^2J_{\text{CF}} = 24.6$  Hz). IR (neat  $\text{cm}^{-1}$ ) 3377, 2927, 2854, 1712, 1601, 1584, 1462, 1273, 1153, 874, 834, 713. HRMS (ESI) Calcd for  $\text{C}_6\text{H}_5\text{ClFN}$  [M+H]: 146.0167; Found: 146.0185.

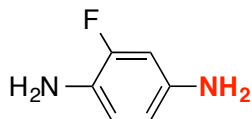

**2-Fluorobenzene-1,4-diamine (4t).**<sup>27</sup> Following the general procedure A, the title compound was prepared using 4-chloro-2-fluoroaniline (145.6, 111  $\mu\text{L}$ , 1.0 mmol) and  $\text{NaO}^t\text{Bu}$  (211.4 mg, 2.2 mmol, 2.2 equiv) at 60  $^\circ\text{C}$ . After work up the crude product was purified by flash chromatography with silica gel using EtOAc / hexanes (4:1) as an eluent to afford 2-fluorobenzene-1,4-diamine (4t) (84.8 mg, 0.67 mmol, 67%) as a reddish-brown solid. The 1 $^\circ$  : 2 $^\circ$  ratio was determined to be 20 : 1 in the crude product based on 0.25 mmol aryl halide. m.p.: 87-88  $^\circ\text{C}$  (lit: 88-89  $^\circ\text{C}$ ).<sup>25</sup>  $^1\text{H}$  NMR (400 MHz,  $\text{CDCl}_3$ )  $\delta$ : 6.61 (dd,  $^4J_{\text{HF}} = 9.6$  Hz,  $^3J_{\text{HH}} = 8.8$  Hz, 1 H), 6.40 (dd,  $^3J_{\text{HF}} = 12.4$  Hz,  $^4J_{\text{HH}} = 2.4$  Hz, 1 H), 6.31 (dd,  $^3J_{\text{HH}} = 8.0$  Hz,  $^4J_{\text{HH}} = 1.6$  Hz, 1 H), 3.37 (br ovrlp, 4 H).  $^{13}\text{C}$  NMR (100 MHz,  $\text{CDCl}_3$ )  $\delta$ : 152.6 (d,  $^1J_{\text{CF}} = 236.5$  Hz), 139.4 (d,  $^3J_{\text{CF}} = 9.2$  Hz), 126.02 (d,  $^2J_{\text{CF}} = 13.5$  Hz), 118.5 (d,  $^3J_{\text{CF}} = 4.7$  Hz), 111.5 (d,  $^4J_{\text{CF}} = 3.1$

Hz), 103.6 (d,  $^2J_{CF} = 21.96$  Hz). **IR** (neat  $\text{cm}^{-1}$ ) 3400, 3307, 3203, 1623, 1591, 1516, 1459, 1299, 1237, 1147, 953, 834, 746, 667. **HRMS** (ESI) Calcd for  $\text{C}_6\text{H}_7\text{FN}_2$  [M+H]: 127.0666; Found: 127.0667.

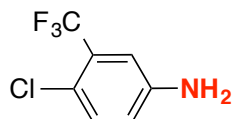

**4-Chloro-3-(trifluoromethyl)aniline (4u).**<sup>28</sup> Following the general procedure A, the title compound was prepared using 4-bromo-1-chloro-2-(trifluoromethyl)benzene (259.5 mg, 149  $\mu\text{L}$ , 1.0 mmol) at 100  $^\circ\text{C}$ . After work up the crude product was purified by flash chromatography with silica gel using EtOAc / hexanes (1:8) and then EtOAc / hexanes (1:5) as eluents to afford 4-chloro-3-(trifluoromethyl)aniline (**4u**) (140.9 mg, 0.72 mmol, 72%) as a brown solid. The 1 $^\circ$  : 2 $^\circ$  ratio was determined to be 19 : 1 in the crude product based on 0.25 mmol aryl halide.  **$^1\text{H}$  NMR** (400 MHz,  $\text{CDCl}_3$ )  $\delta$ : 7.20 (d,  $J = 8.4$  Hz, 1 H), 6.94 (d,  $J = 2.4$  Hz, 1 H), 6.70 (dd,  $J = 8.4$  Hz,  $J = 2.4$  Hz, 1 H), 3.84 (br s, 2 H).  **$^{13}\text{C}$  NMR** (100 MHz,  $\text{CDCl}_3$ )  $\delta$ : 145.3, 132.2, 128.7 (q,  $^2J_{CF} = 30.8$  Hz), 123.0 (q,  $^1J_{CF} = 271.5$  Hz), 120.2 (q,  $^3J_{CF} = 1.7$  Hz), 118.8, 113.7 (q,  $^3J_{CF} = 5.4$  Hz). **IR** (neat  $\text{cm}^{-1}$ ) 3383, 1626, 1485, 1444, 1334, 1256, 1169, 1114, 1028, 869, 821, 668. **HRMS** (ESI) Calcd for  $\text{C}_7\text{H}_5\text{ClF}_3\text{N}$  [M+H]: 196.0135; Found: 196.0136.

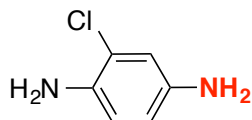

**2-Chlorobenzene-1,4-diamine (4v).**<sup>29</sup> Following the general procedure A, the title compound was prepared using 4-bromo-2-chloroniline (206.5 mg, 1.0 mmol) and  $\text{NaO}^t\text{Bu}$  (211.4 mg, 2.2 mmol, 2.2 equiv) at 80  $^\circ\text{C}$ . After work up the crude product was purified by flash chromatography with silica gel using EtOAc / hexanes (1:1) and then EtOAc / hexanes (2:1) as eluents to afford 2-chlorobenzene-1,4-diamine (**4v**) (112.6 mg, 0.79 mmol, 79%) as a deep brown solid. **m.p.:** 61-62  $^\circ\text{C}$  (lit: 62-64  $^\circ\text{C}$ ).<sup>30</sup>  **$^1\text{H}$  NMR** (400 MHz,  $\text{CDCl}_3$ )  $\delta$ : 6.64 (d,  $J = 2.8$  Hz, 1 H), 6.60 (d,  $J = 8.4$  Hz, 1 H), 6.46 (dd,  $J = 8.4$  Hz,  $J = 2.8$  Hz, 1 H), 3.51 (br ovrlp, 4 H).  **$^{13}\text{C}$  NMR** (100 MHz,  $\text{CDCl}_3$ )  $\delta$ : 139.1, 135.2, 120.4, 117.4, 116.4, 115.6. **IR** (neat  $\text{cm}^{-1}$ ) 3411, 3322, 1602, 1500, 1435, 1303, 1234, 1038, 862, 814, 711, 667. **HRMS** (ESI) Calcd for  $\text{C}_6\text{H}_7\text{ClN}_2$  [M+H]: 143.0371; Found: 143.0371.

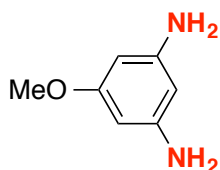

**5-Methoxybenzene-1,3-diamine (4w).** Following the general procedure A, the title compound was prepared using 1,3-dichloro-5-methoxybenzene (177.0 mg, 1.0 mmol),  $\text{NaO}^t\text{Bu}$  (269.1 mg, 2.8 mmol, 2.8 equiv), ammonia solution (0.5 M, 12.0 mL, 6.0 mmol, 6.0 equiv), and 1,4-dioxane (1.0 mL) at 80  $^\circ\text{C}$ . After work up the crude product was purified by flash chromatography with silica gel using EtOAc as an eluent to afford an inseparable viscous deep brown oily mixture of 5-methoxybenzene-1,3-diamine (**4w**) (108 mg, 0.78 mmol, 78%) and 3,3'-diamino-5,5'-dimethoxy-diphenylamine (**4w'**) (9%). The 1 $^\circ$  : 2 $^\circ$  ratio was determined to be 9 : 1 in the isolated product mixture.  **$^1\text{H}$  NMR (1 $^\circ$ )** (400 MHz,  $\text{CDCl}_3$ )  $\delta$ : 5.68 (s, 2 H), 5.61 (s, 1 H), 3.68 (s, 3 H), 3.58 (br s, 4 H).  **$^{13}\text{C}$  NMR (1 $^\circ$ )** (100 MHz,  $\text{CDCl}_3$ )  $\delta$ : 161.7, 148.6, 95.1, 91.9, 55.0. **HRMS** (ESI) Calcd for  $\text{C}_7\text{H}_{10}\text{N}_2\text{O}$  [M+H] (1 $^\circ$ ): 139.0866. Found: 139.0857; Calcd for  $\text{C}_{14}\text{H}_{17}\text{N}_3\text{O}_2$  [M+H] (2 $^\circ$ ): 260.1394. Found: 260.1403.

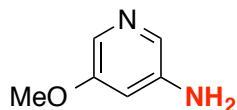

**3-Amino-5-methoxypyridine (5a).**<sup>31</sup> Following the general procedure A, the title compound was prepared using 3-bromo-5-methoxypyridine (188.0 mg, 1.0 mmol) at 80 °C. After work up the crude product was purified by flash chromatography with silica gel (initially eluted with hexanes/Et<sub>3</sub>N (50:1) using EtOAc and then EtOAc/MeOH (15:1) as eluents to afford an inseparable brown solid mixture of 3-amino-5-methoxypyridine (**5a**) (113 mg, 0.91 mmol, 91%) and bis(5-methoxypyridin-3-yl)amine (**5a'**) (4%). The 1° : 2° ratio was determined to be 23 : 1 the isolated product mixture. **<sup>1</sup>H NMR (1°)** (400 MHz, CDCl<sub>3</sub>) δ: 7.72-7.71 (ovrlp, 2 H), 6.52 (t, *J* = 2.4 Hz, 1 H), 4.04 (br s, 2 H), 3.79 (s, 3 H). **<sup>13</sup>C NMR (1°)** (100 MHz, CDCl<sub>3</sub>) δ: 156.4, 143.9, 129.9, 126.9, 106.7, 55.3. **IR** (neat cm<sup>-1</sup>) 3335, 3152, 1588, 1486, 1446, 1430, 1332, 1270, 1204, 1173, 1039, 1017, 969, 843, 734, 700. **HRMS** (ESI) Calcd for C<sub>6</sub>H<sub>8</sub>N<sub>2</sub>O [M+H] (1°): 125.0709. Found: 125.0709; Calcd for C<sub>12</sub>H<sub>13</sub>N<sub>3</sub>O<sub>2</sub> [M+H]: (2°): 232.1081. Found: 232.1090.

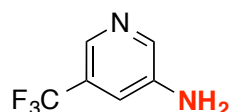

**3-Amino-5-(trifluoromethyl)pyridine (5b).**<sup>32</sup> Following the general procedure A, the title compound was prepared using 3-chloro-5-(trifluoromethyl)pyridine (181.5 mg, 1.0 mmol) at 80 °C. After work up the crude product was purified by flash chromatography with silica gel using EtOAc/hexanes (1:1) and then EtOAc/hexanes (2:1) as eluents to afford an inseparable brown oily mixture of 3-amino-5-(trifluoromethyl)pyridine (**5b**) (147.5 mg, 0.94 mmol, 94%) and bis(5-(trifluoromethyl)pyridin-3-yl)amine (**5b'**) (2%). The 1° : 2° ratio was determined to be 47 : 1 of the isolated product mixture based on 0.25 mmol heteroaryl halide. **<sup>1</sup>H NMR (1°)** (400 MHz, CDCl<sub>3</sub>) δ: 8.23 (ovrlp, 2 H), 7.14 (s, 1 H), 4.25 (br s, 2 H). **<sup>13</sup>C NMR (1°)** (100 MHz, CDCl<sub>3</sub>) δ: 142.9, 140.2 (q, <sup>4</sup>*J*<sub>CF</sub> = 1.2 Hz), 135.6 (q, <sup>3</sup>*J*<sub>CF</sub> = 4.8 Hz), 127.0 (q, <sup>2</sup>*J*<sub>CF</sub> = 32.3 Hz), 123.6 (q, <sup>1</sup>*J*<sub>CF</sub> = 270.9 Hz), 117.4 (q, <sup>3</sup>*J*<sub>CF</sub> = 3.6 Hz). **HRMS** (ESI) Calcd for C<sub>6</sub>H<sub>5</sub>F<sub>3</sub>N<sub>2</sub> [M+H] (1°): 163.0478; Found: 163.0477; Calcd for C<sub>12</sub>H<sub>7</sub>F<sub>6</sub>N<sub>3</sub> [M+H]<sup>+</sup>: 308.0617; Found: 308.0635.

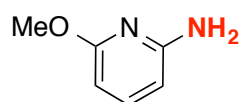

**2-Amino-6-methoxypyridine (5c).**<sup>33</sup> Following the general procedure A, the title compound was prepared using 2-chloro-6-methoxypyridine (143.6 mg, 119 μL, 1.0 mmol) at 50 °C. After work up the crude product was purified by flash chromatography with silica gel using EtOAc/hexanes (1:5) and then EtOAc/hexanes (1:3) as eluents to afford 2-amino-6-methoxypyridine (**5c**) (107.8 mg, 0.87 mmol, 87%) as brown oil. **<sup>1</sup>H NMR** (400 MHz, CDCl<sub>3</sub>) δ: 7.32 (t, *J* = 8.0 Hz, 1 H), 6.08 (d, *J* = 8.0 Hz, 1 H), 6.04 (d, *J* = 7.6 Hz, 1 H), 4.44 (br s, 2 H), 3.83 (s, 3 H). **<sup>13</sup>C NMR** (100 MHz, CDCl<sub>3</sub>) δ: 163.7, 157.4, 140.3, 99.8, 98.3, 53.3. **IR** (neat cm<sup>-1</sup>) 3473, 3371, 2949, 1575, 1452, 1416, 1340, 1253, 1150, 1120, 1028, 958, 780, 729. **Anal.** Calcd. for C<sub>6</sub>H<sub>8</sub>N<sub>2</sub>O: C, 58.05; H, 6.50; Found: C, 58.45; H, 6.76.

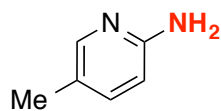

**2-Amino-5-methylpyridine (5d).**<sup>34</sup> Following the general procedure A, the title compound was prepared using 2-chloro-5-methylpyridine (127.6 mg, 109  $\mu$ L, 1.0 mmol) at 50 °C. After work up the crude product was purified by flash chromatography with silica gel (initially eluted with EtOAc/triethylamine (50:1)) using EtOAc and then EtOAc/MeOH (20:1) as eluents to afford 2-amino-5-methylpyridine (**5d**) (81.1 mg, 0.75 mmol, 75%) as a pale-yellow solid. **m.p.:** 74-75 °C (lit: 76-77 °C).<sup>34</sup> **<sup>1</sup>H NMR** (400 MHz, CDCl<sub>3</sub>)  $\delta$ : 7.88 (s, 1 H), 7.23 (dd,  $J$  = 8.0 Hz,  $J$  = 2.4 Hz, 1 H), 6.42 (d,  $J$  = 8.0 Hz, 1 H), 4.50 (br s, 2 H), 2.16 (s, 3 H). **<sup>13</sup>C NMR** (100 MHz, CDCl<sub>3</sub>)  $\delta$ : 156.6, 147.5, 138.7, 122.7, 108.4, 17.4. **IR** (neat cm<sup>-1</sup>) 3451, 3299, 3161, 2921, 1626, 1564, 1499, 1390, 1317, 1265, 1143, 1021, 824, 752, 652. **Anal.** Calcd. for C<sub>6</sub>H<sub>8</sub>N<sub>2</sub>: C, 66.64; H, 7.46; Found: C, 66.88; H, 7.45.

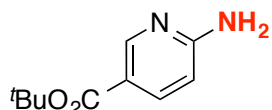

**tert-Butyl 6-aminonicotinate (5e).**<sup>35</sup> Following the general procedure A, the title compound was prepared using *tert*-butyl 6-bromonicotinate (258.1 mg, 1.0 mmol) at 50 °C. After work up the crude product was purified by flash chromatography with silica gel using EtOAc/hexanes (1:2) and then EtOAc/hexanes (2:1) as eluents to afford *tert*-butyl 6-aminonicotinate (**5e**) (113.8 mg, 0.59 mmol, 59%) as an off-white solid. **m.p.:** 101-102 °C (lit: 94-96 °C).<sup>35</sup> **<sup>1</sup>H NMR** (400 MHz, CDCl<sub>3</sub>)  $\delta$ : 8.66 (d,  $J$  = 1.6 Hz, 1 H), 7.94 (dd,  $J$  = 8.8 Hz,  $J$  = 2.0 Hz, 1 H), 6.45 (d,  $J$  = 8.8 Hz, 1 H), 5.48 (br s, 2 H), 1.57 (s, 9 H). **<sup>13</sup>C NMR** (100 MHz, CDCl<sub>3</sub>)  $\delta$ : 165.1, 161.2, 151.1, 138.7, 117.6, 107.3, 80.7, 28.3. **IR** (neat cm<sup>-1</sup>) 3389, 3152, 1685, 1654, 1598, 1514, 1364, 1288, 1172, 1126, 1012, 834, 782. **Anal.** Calcd. for C<sub>10</sub>H<sub>14</sub>N<sub>2</sub>O<sub>2</sub>: C, 61.84; H, 7.27; Found: C, 61.44; H, 7.04.

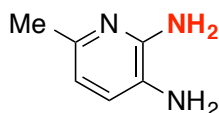

**2,3-Diamino-6-methylpyridine (5f).**<sup>36</sup> Following the general procedure A, the title compound was prepared using 2-chloro-3-amino-6-methylpyridine (142.6 mg, 1.0 mmol) and NaO<sup>*t*</sup>Bu (211.4 mg, 2.2 mmol) at 50 °C. After work up the crude product was purified by flash chromatography with silica gel (initially eluted with hexanes/triethylamine (50:1)) using EtOAc and then EtOAc/MeOH (10:1) as eluents to afford 2,3-diamino-6-methylpyridine (**5f**) (46.8 mg, 0.38 mmol, 38%) as a deep-brown solid. The yield of **5f** was determined to be 75% (NMR yield) based on 0.25 mmol heteroaryl halide using 1,3,5-trimethoxybenzene as internal standard. **<sup>1</sup>H NMR** (400 MHz, CDCl<sub>3</sub>)  $\delta$ : 6.80 (d,  $J$  = 7.6 Hz, 1 H), 6.45 (d,  $J$  = 7.6 Hz, 1 H), 4.39 (br s, 2 H), 3.29 (br s, 2 H), 2.33 (s, 3 H). **<sup>13</sup>C NMR** (100 MHz, CDCl<sub>3</sub>)  $\delta$ : 148.9, 147.0, 126.2, 123.7, 114.2, 23.1. **IR** (neat cm<sup>-1</sup>) 3185, 2920, 1616, 1473, 1375, 1265, 1221, 1121, 1031, 802, 733. **HRMS** (ESI) Calcd for C<sub>6</sub>H<sub>9</sub>N<sub>3</sub> [M+H]: 124.0869; Found: 124.0868.

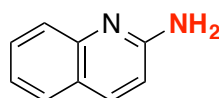

**2-Aminoquinoline (5g).**<sup>37</sup> Following the general procedure A, the title compound was prepared using 2-chloroquinoline (163.6 mg, 1.0 mmol) at 80 °C. After work up the crude product was purified by flash chromatography with silica gel (initially eluted with hexanes/triethylamine (50:1)) using EtOAc and then EA/hexanes (20:1) as eluents to afford 2-aminoquinoline (**5g**) (83.6 mg, 0.58 mmol, 58%) as a pale-brown solid. **m.p.:** 126-127 °C (lit: 127-128 °C).<sup>37</sup> **<sup>1</sup>H NMR** (400 MHz, CDCl<sub>3</sub>)  $\delta$ : 7.79 (d,  $J$  = 8.8 Hz, 1 H), 7.66 (d,  $J$  = 8.4 Hz, 1 H), 7.57 (d,  $J$  = 8.0 Hz, 1 H), 7.52 (t,  $J$  = 8.0 Hz, 1 H), 7.22 (t,  $J$  = 8.0 Hz,

1 H), 6.65 (d,  $J = 8.8$  Hz, 1 H), 5.30 (br s, 2 H).  $^{13}\text{C}$  NMR (100 MHz,  $\text{CDCl}_3$ )  $\delta$ : 157.3, 147.6, 138.0, 129.7, 127.5, 125.7, 123.5, 122.5, 111.9. IR (neat  $\text{cm}^{-1}$ ) 3422, 3301, 3122, 1647, 1563, 1509, 1483, 1429, 1393, 1354, 1123, 822, 751, 702, 621. Anal. Calcd. for  $\text{C}_9\text{H}_8\text{N}_2$ : C, 67.16; H, 4.51; Found: C, 67.04; H, 4.46.

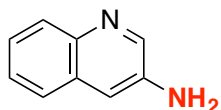

**3-Aminoquinoline (5h).**<sup>38</sup> Following the general procedure A, the title compound was prepared using 3-bromoquinoline (208.1 mg, 136  $\mu\text{L}$ , 1.0 mmol) at 60  $^\circ\text{C}$ . After work up the crude product was purified by flash chromatography with silica gel using EtOAc (100%) as an eluent to afford 3-aminoquinoline (**5h**) (137.9 mg, 0.95 mmol, 95%) as a brown solid. m.p.: 81  $^\circ\text{C}$  (lit: 80-83  $^\circ\text{C}$ ).<sup>39</sup>  $^1\text{H}$  NMR (400 MHz,  $\text{CDCl}_3$ )  $\delta$ : 8.47 (d,  $J = 2.4$  Hz, 1 H), 7.96 (d,  $J = 7.2$  Hz, 1 H), 7.52 (d,  $J = 7.2$  Hz, 1 H), 7.42-7.36 (ovrlp, 2 H), 7.12 (d,  $J = 2.8$  Hz, 1 H), 4.08 (br s, 2 H).  $^{13}\text{C}$  NMR (100 MHz,  $\text{CDCl}_3$ )  $\delta$ : 143.1, 142.5, 140.0, 129.2, 128.9, 126.9, 125.8, 125.4, 114.7. IR (neat  $\text{cm}^{-1}$ ) 3315, 3158, 1608, 1495, 1433, 1345, 1289, 1219, 1128, 978, 882, 838, 771, 743. Anal. Calcd. for  $\text{C}_9\text{H}_8\text{N}_2$ : C, 74.98; H, 5.59; Found: C, 74.70 H, 5.54.

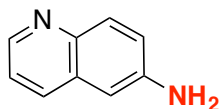

**6-Aminoquinoline (5i).**<sup>40</sup> Following the general procedure A, the title compound was prepared using 6-chloroquinoline (163.6 mg, 1.0 mmol) at 50  $^\circ\text{C}$ . After work up the crude product was purified by flash chromatography with silica gel (initially eluted with hexanes/triethylamine (50:1)) using EtOAc as an eluent to afford 6-aminoquinoline (**5i**) (130.7 mg, 0.91 mmol, 91%) as a brown solid. m.p.: 113-114  $^\circ\text{C}$  (lit: 115-116  $^\circ\text{C}$ ).<sup>41</sup>  $^1\text{H}$  NMR (400 MHz,  $\text{CDCl}_3$ )  $\delta$ : 8.63 (d,  $J = 3.2$  Hz, 1 H), 7.89 (d,  $J = 8.8$  Hz, 1 H), 7.81 (d,  $J = 8.0$  Hz, 1 H), 7.20 (dd,  $J = 8.0$  Hz,  $J = 4.0$  Hz, 1 H), 7.10 (dd,  $J = 8.8$  Hz,  $J = 1.6$  Hz, 1 H), 6.81 (s, 1 H), 4.13 (br s, 2 H).  $^{13}\text{C}$  NMR (100 MHz,  $\text{CDCl}_3$ )  $\delta$ : 146.5, 144.8, 143.2, 133.7, 130.2, 129.7, 121.6, 121.3, 107.2. IR (neat  $\text{cm}^{-1}$ ) 3397, 3311, 3180, 1635, 1616, 1505, 1439, 1375, 1282, 1238, 1146, 1122, 959, 910, 824, 761. Anal. Calcd. for  $\text{C}_9\text{H}_8\text{N}_2$ : C, 74.98; H, 5.59; Found: C, 54.67; H, 5.84.

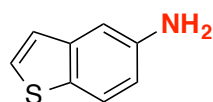

**5-Aminobenzothiophene (5j).**<sup>42</sup> Following the general procedure A, the title compound was prepared using 5-chlorobenzothiophene (168.6 mg, 1.0 mmol) at 80  $^\circ\text{C}$ . After work up the crude product was purified by flash chromatography with silica gel using EtOAc/hexanes (1:4) and then EtOAc/hexanes (1:3) as eluents to afford 5-aminobenzothiophene (**5j**) (136.2 mg, 0.91 mmol, 91%) as a brown solid. m.p.: 71-72  $^\circ\text{C}$  (lit: 71.2  $^\circ\text{C}$ ).<sup>43</sup>  $^1\text{H}$  NMR (400 MHz,  $\text{CDCl}_3$ )  $\delta$ : 7.58 (d,  $J = 8.8$  Hz, 1 H), 7.33 (d,  $J = 5.6$  Hz, 1 H), 7.45 (d,  $J = 5.6$  Hz, 1 H), 7.01 (d,  $J = 2.0$  Hz, 1 H), 6.70 (dd,  $J = 8.4$  Hz,  $J = 2.0$  Hz, 1 H), 3.62 (br s, 2 H).  $^{13}\text{C}$  NMR (100 MHz,  $\text{CDCl}_3$ )  $\delta$ : 143.6, 140.9, 130.3, 127.1, 123.1, 123.0, 114.9, 108.2. IR (neat  $\text{cm}^{-1}$ ) 3427, 3347, 1594, 1502, 1428, 1268, 1246, 1163, 862, 839, 798, 764, 702. Anal. Calcd. for  $\text{C}_8\text{H}_7\text{NS}$ : C, 64.39; H, 4.73; Found: C, 64.73; H, 4.95.

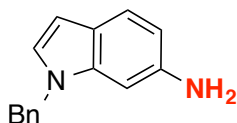

**1-Benzyl-6-amino-1*H*-indole (5k).** Following the general procedure A, the title compound was prepared using 1-benzyl-6-chloro-1*H*-indole (**S2**) (241.7 mg, 1.0 mmol) at 80 °C. After work up the crude product was purified by flash chromatography with silica gel using EtOAc/hexanes (1:4) and then EtOAc/hexanes (1:2) as eluents to afford 1-benzyl-6-amino-1*H*-indole (**5k**) (203.4 mg, 0.91 mmol, 91%) as a brown solid. **m.p.:** 143-144 °C. <sup>1</sup>H NMR (400 MHz, CDCl<sub>3</sub>) δ: 7.39 (d, *J* = 8.4 Hz, 1 H), 7.27-7.16 (ovrlp, 3 H), 7.04 (d, *J* = 7.2 Hz, 2 H), 6.88 (d, *J* = 2.8 Hz, 1 H), 6.51 (d, *J* = 8.0 Hz, 1 H), 6.47 (s, 1 H), 6.40 (d, *J* = 2.8 Hz, 1 H), 5.13 (s, 2 H), 3.49 (br s, 2 H). <sup>13</sup>C NMR (100 MHz, CDCl<sub>3</sub>) δ: 142.1, 137.8, 137.6, 128.8, 127.5, 126.7, 126.5, 122.0, 121.6, 110.6, 101.7, 95.3, 49.9. **IR** (neat cm<sup>-1</sup>) 3436, 3351, 1624, 1493, 1469, 1454, 1432, 1337, 1325, 1278, 1228, 1180, 803, 734, 723. **Anal.** Calcd. for C<sub>15</sub>H<sub>14</sub>N<sub>2</sub>: C, 81.05; H, 6.35; Found: C, 80.75; H, 6.42.

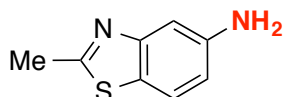

**5-Amino-2-methylbenzothiazole (5l).**<sup>44</sup> Following the general procedure A, the title compound was prepared using 5-chloro-2-methylbenzothiazole (183.7 mg, 1.0 mmol) at 60 °C. After work up the crude product was purified by flash chromatography with silica gel using EtOAc/hexanes (1:1) and then EtOAc/hexanes (4:1) as eluents to afford 5-amino-2-methylbenzothiazole (**5l**) (155.5 mg, 0.95 mmol, 95%) as a pale-brown solid. **m.p.:** 100-101 °C (lit: 103.5-105 °C).<sup>44</sup> <sup>1</sup>H NMR (400 MHz, CDCl<sub>3</sub>) δ: 7.52 (d, *J* = 8.0 Hz, 1 H), 7.23 (s, 1 H), 6.72 (d, *J* = 7.2 Hz, 1 H), 3.85 (br s, 2 H), 2.76 (s, 3 H). <sup>13</sup>C NMR (100 MHz, CDCl<sub>3</sub>) δ: 167.8, 154.8, 145.4, 125.3, 121.6, 114.5, 107.4, 20.0. **IR** (neat cm<sup>-1</sup>) 3383, 3308, 3196, 1635, 1556, 1522, 1469, 1436, 1316, 1173, 1152, 947, 857, 797, 693, 646. **Anal.** Calcd. for C<sub>8</sub>H<sub>8</sub>N<sub>2</sub>S: C, 58.51; H, 4.91; Found: C, 58.44; H, 5.03.

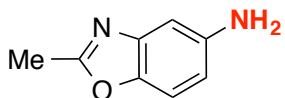

**5-Amino-2-methylbenzoxazole (5m).**<sup>45</sup> Following the general procedure A, the title compound was prepared using 5-chloro-2-methylbenzoxazole (167.6 mg, 1.0 mmol) at 80 °C. After work up the crude product was purified by flash chromatography with silica gel using EtOAc/hexanes (4:1) and then EtOAc/MeOH (10:1) as eluents to afford 5-amino-2-methylbenzoxazole (**5m**) (103.8 mg, 0.70 mmol, 70%) as a pale-brown solid. The 1° : 2° ratio was determined to be 10 : 1 in the crude product based on 0.25 mmol hereroaryl halide. **m.p.:** 71-73 °C. <sup>1</sup>H NMR (400 MHz, CDCl<sub>3</sub>) δ: 7.21 (d, *J* = 8.8 Hz, 1 H), 6.92 (d, *J* = 2.0 Hz, 1 H), 6.61 (dd, *J* = 8.4 Hz, *J* = 2.0 Hz, 1 H), 3.77 (s, 2 H), 2.55 (s, 3 H). <sup>13</sup>C NMR (100 MHz, CDCl<sub>3</sub>) δ: 164.3, 144.8, 143.6, 142.4, 112.8, 110.2, 104.7, 14.5. **IR** (neat cm<sup>-1</sup>) 3420, 3348, 1622, 1568, 1486, 1450, 1381, 1272, 1176, 923, 841, 804, 688, 660, 616. **HRMS** (ESI) Calcd for C<sub>8</sub>H<sub>8</sub>N<sub>2</sub>O [M+H]: 149.0709; Found: 149.0709.

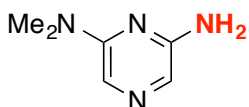

**2-Amino-6-(dimethylamino)pyrazine (5n).**

**(i) 50 °C.** Following the general procedure A, the title compound was prepared using 2-chloro-6-(dimethylamino)pyrazine (157.6 mg, 1.0 mmol) at 50 °C. After work up the crude product was purified by flash chromatography with silica gel (initially eluted with hexanes/triethylamine (50:1)) using EtOAc and then EtOAc/MeOH (20:1) as eluents to afford an inseparable deep-brown mixture of 2-amino-6-(dimethylamino)pyrazine (**5n**) (91.9 mg, 0.62 mmol, 62%) and bis(6-(dimethylamino)pyrazin-2-

yl)amine (**5n'**) (4%). The 1° : 2° ratio was determined to be 16:1 of the isolated product mixture. <sup>1</sup>H NMR of 1° product (400 MHz, CDCl<sub>3</sub>) δ: 7.37 (s, 1 H), 7.24 (s, 1 H), 4.35 (br s, 2 H), 3.03 (s, 6 H). <sup>13</sup>C NMR (100 MHz, CDCl<sub>3</sub>) δ: 154.0, 152.6, 118.8, 118.0, 37.5. IR (neat cm<sup>-1</sup>) 3423, 3276, 3114, 1629, 1575, 1525, 1428, 1389, 1307, 1230, 1204, 1160, 1106, 910, 802, 668. HRMS (ESI) Calcd for C<sub>6</sub>H<sub>10</sub>N<sub>4</sub> [M+H] (1°) 139.9078; Found: 139.0972; Calcd for C<sub>12</sub>H<sub>17</sub>N<sub>7</sub> [M+H] (2°): 260.1618; Found: 260.1632.

(ii) rt. Following the general procedure A, the title compound was prepared using 2-chloro-6-(dimethylamino)pyrazine (157.6 mg, 1.0 mmol), Pd precatalyst **3a** (27.6 mg, 0.030 mmol), and **L6** (16.5 mg, 0.030 mmol) at room temperature. After work up the crude product was purified by flash chromatography with alumina using EtOAc/hexanes (1:4) and then EtOAc as eluents to afford an inseparable deep-brown mixture of 2-amino-6-(dimethylamino)pyrazine (**5n**) (114.7 mg, 0.62 mmol, 83%) and bis(6-(dimethylamino)pyrazin-2-yl)amine (**5n'**) (3%). The 1° : 2° ratio was determined to be 29:1 of the isolated product mixture based on 0.25 mmol heteroaryl halide. Spectral and analytical data were identical to those reported for the same compound above.

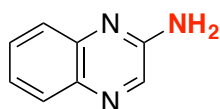

**2-Aminoquinoxaline (5o).**<sup>46</sup> Following the general procedure A, the title compound was prepared using 2-chloroquinoxaline (164.6 mg, 1.0 mmol) at 50 °C. After work up the crude product was purified by flash chromatography with silica gel (initially eluted with hexanes/triethylamine (50:1)) using EtOAc/hexanes (1:4) and then EtOAc/hexanes (5:1) as eluents to afford 2-aminoquinoxaline (**5o**) (101.8 mg, 0.70 mmol, 70%) as a yellow solid. **m.p.:** 155-157 °C (lit: 155-157 °C).<sup>47</sup> <sup>1</sup>H NMR (400 MHz, DMSO-*d*<sub>6</sub>) δ: 8.31 (d, *J* = 1.6 Hz, 1 H), 7.76 (d, *J* = 8.4 Hz, 1 H), 7.55-7.49 (ovrlp, 2 H), 7.34-7.28 (m, 1 H), 6.98 (br s, 2 H). <sup>13</sup>C NMR (100 MHz, DMSO-*d*<sub>6</sub>) δ: 153.6, 141.9, 139.2, 136.4, 129.6, 128.5, 125.4, 123.4. IR (neat cm<sup>-1</sup>) 3318, 3116, 1743, 1658, 1586, 1568, 1481, 1425, 1353, 1238, 1125, 1025, 976, 915, 752. HRMS (ESI) Calcd for C<sub>8</sub>H<sub>7</sub>N<sub>3</sub> [M+H]: 146.0713; Found: 146.0710.

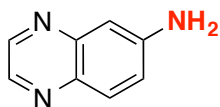

**6-Aminoquinoxaline (5p).**<sup>48</sup>

(i) 50 °C. Following the general procedure A, the title compound was prepared using 6-bromoquinoxaline (209.0 mg, 1.0 mmol) at 50 °C. After work up the crude product was purified by flash chromatography with silica gel using EtOAc and then EtOAc/MeOH (20:1) as eluents to afford 6-aminoquinoxaline (**5p**) (127.4 mg, 0.88 mmol, 88%) as a deep brown solid. **m.p.:** 155-156 °C (lit: 157 °C).<sup>48</sup> <sup>1</sup>H NMR (400 MHz, DMSO-*d*<sub>6</sub>) δ: 8.60 (d, *J* = 1.6 Hz, 1 H), 8.44 (d, *J* = 2.0 Hz, 1 H), 7.73 (d, *J* = 9.2 Hz, 1 H), 7.25 (dd, *J* = 9.2 Hz, *J* = 2.4 Hz, 1 H), 6.93 (d, *J* = 2.4 Hz, 1 H), 6.08 (br s, 2 H). <sup>13</sup>C NMR (100 MHz, DMSO-*d*<sub>6</sub>) δ: 150.5, 145.0, 144.9, 139.7, 136.5, 129.7, 122.4, 105.0. IR (neat cm<sup>-1</sup>) 3393, 3312, 3182, 1645, 1611, 1501, 1434, 1370, 1307, 1225, 1134, 1031, 959, 857, 816. HRMS (ESI) Calcd for C<sub>8</sub>H<sub>7</sub>N<sub>3</sub> [M+H]: 146.0713. Found: 146.0713.

(ii) rt. Following the general procedure A, the title compound was prepared using 6-bromoquinoxaline (209.0 mg, 1.0 mmol), Pd precatalyst **3a** (27.6 mg, 0.030 mmol), and **L6** (16.5 mg, 0.030 mmol) at room temperature. After work up the crude product was purified by flash chromatography with silica gel using EtOAc and then EtOAc/MeOH (20:1) as eluents to afford 6-aminoquinoxaline (**5p**) (126.8 mg, 0.87 mmol, 87%) as a deep brown solid. Spectral and analytical data were identical to those reported for the same compound above. <sup>1</sup>H NMR (400 MHz, CDCl<sub>3</sub>) δ: 8.66 (d, *J* = 2.0 Hz, 1 H), 8.55 (d, *J* = 2.0 Hz, 1

H), 7.88 (d,  $J = 9.2$  Hz, 1 H), 7.19 (dd,  $J = 9.2$  Hz,  $J = 2.4$  Hz, 1 H), 7.15 (d,  $J = 2.4$  Hz, 1 H), 4.40 (br s, 2 H).

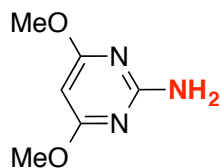

**2-Amino-4,6-dimethoxypyrimidine (5q).**<sup>49</sup> Following the general procedure A, the title compound was prepared using 2-chloro-4,6-dimethoxypyrimidine (174.6 mg, 1.0 mmol) at 50 °C. After work up the crude product was purified by flash chromatography with silica gel using EtOAc/hexanes (1:1) as an eluent to afford 2-amino-4,6-dimethoxypyrimidine (**5q**) (124.1 mg, 0.80 mmol, 80%) as a white solid. **m.p.:** 97-98 °C (lit: 95 °C).<sup>49</sup> **<sup>1</sup>H NMR** (400 MHz, CDCl<sub>3</sub>)  $\delta$ : 5.46 (s, 1 H), 5.40 (s, 2 H), 3.83 (s, 6 H). **<sup>13</sup>C NMR** (100 MHz, CDCl<sub>3</sub>)  $\delta$ : 172.4, 162.5, 79.4, 53.7. **IR** (neat cm<sup>-1</sup>) 3407, 3308, 3181, 1633, 1569, 1444, 1409, 1360, 1210, 1147, 1100, 1043, 1008, 926, 791, 769, 681. **HRMS** (ESI) Calcd for C<sub>6</sub>H<sub>9</sub>N<sub>3</sub>O<sub>2</sub> [M+H]: 156.0768; Found: 156.0759.

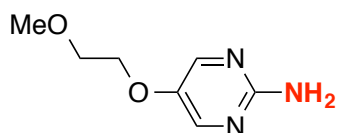

**2-amino-5-(2-methoxyethoxy)pyrimidine (5r).** Following the general procedure A, the title compound was prepared using 2-chloro-5-(2-methoxyethoxy)pyrimidine (**S5**) (377.2 mg, 2.0 mmol), NH<sub>3</sub> solution (0.5 M, 6.0 mmol, 12.0 mL), NaO<sup>t</sup>Bu (269.1 mg, 2.8 mmol), Pd precatalyst **3a** (36.7 mg, 0.040 mmol), **L6** (22.0 mg, 0.040 mmol), and 1,4-dioxane (1.0 mL) at 100 °C. After work up the crude product was purified by flash chromatography with silica gel (initially eluted with hexanes/triethylamine (50:1)) using EtOAc and then EtOAc/MeOH (15:1) as an eluent to afford 2-amino-5-(2-methoxyethoxy)pyrimidine (**5q**) (214.6 mg, 0.63 mmol, 63%) as a white solid. **m.p.:** 79-81 °C. **<sup>1</sup>H NMR** (400 MHz, CDCl<sub>3</sub>)  $\delta$ : 8.08 (s, 2 H), 5.55 (br s, 2 H), 4.09 (t,  $J = 4.8$  Hz, 2 H), 3.71 (t,  $J = 4.8$  Hz, 2 H), 3.43 (s, 3 H). **<sup>13</sup>C NMR** (100 MHz, CDCl<sub>3</sub>)  $\delta$ : 158.8, 146.3, 146.2, 70.8, 69.2, 58.9. **IR** (neat cm<sup>-1</sup>) 3403, 3315, 3196, 2883, 1630, 1553, 1466, 1266, 1189, 1123, 1065, 1035, 908, 863, 783, 650. **Anal.** Calcd. for C<sub>7</sub>H<sub>11</sub>N<sub>3</sub>O<sub>2</sub>: C, 49.70; H, 6.55; Found: C, 49.78; H, 6.58.

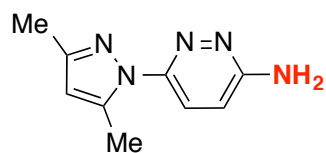

**3-Amino-6-(3,5-dimethyl-1H-pyrazol-1-yl)pyridazine (5s).** Following the general procedure A, the title compound was prepared using 3-chloro-6-(3,5-dimethyl-1H-pyrazol-1-yl)pyridazine (208.7 mg, 1.0 mmol) at 50 °C. After work up the crude product was purified by flash chromatography with silica gel (initially eluted with hexanes/triethylamine (50:1)) using EtOAc and then EtOAc/MeOH (20:1) as eluents to afford 3-amino-6-(3,5-dimethyl-1H-pyrazol-1-yl)pyridazine (**5s**) (67.4 mg, 0.36 mmol, 36%) as a brown solid. The <sup>1</sup>H NMR of **5s** was determined to be 56% based on 0.25 mmol reaction using 1,3,5-trimethoxybenzene as internal standard. **m.p.:** 141-142 °C. **<sup>1</sup>H NMR** (400 MHz, CDCl<sub>3</sub>)  $\delta$ : 7.78 (d,  $J = 9.2$  Hz, 1 H), 6.89 (d,  $J = 9.2$  Hz, 1 H), 6.00 (s, 1 H), 5.20 (br s, 2 H), 2.59 (s, 3 H), 2.28 (s, 3 H). **<sup>13</sup>C NMR** (100 MHz, CDCl<sub>3</sub>)  $\delta$ : 158.3, 150.9, 150.0, 141.4, 123.7, 117.3, 108.7, 14.0, 13.6. **IR** (neat cm<sup>-1</sup>)



<sup>1</sup>) 3306, 3139, 1624, 1552, 1476, 1436, 1338, 1219, 1034, 1016, 971, 836, 793. **Anal.** Calcd. for C<sub>9</sub>H<sub>11</sub>N<sub>5</sub>: C, 57.13; H, 5.86; Found: C, 57.02; H, 5.73.

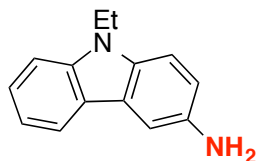

**3-Amino-9-ethyl-9H-carbazole (5t).**<sup>50</sup> Following the general procedure A, the title compound was prepared using 3-bromo-9-ethyl-9H-carbazole (274.2 mg, 1.0 mmol) at 100 °C. After work up the crude product was purified by flash chromatography with silica gel using EtOAc/hexanes (1:2) and then EtOAc/hexanes (2:1) as eluents to afford 3-amino-9-ethyl-9H-carbazole (**5t**) (183.6 mg, 0.87 mmol, 87%) as a brown solid. **m.p.:** 109-112 °C (lit: 113-114 °C).<sup>50</sup> **<sup>1</sup>H NMR** (400 MHz, CDCl<sub>3</sub>) δ: 7.96 (d, *J* = 8.0 Hz, 1 H), 7.42-7.38 (ovrlp, 2 H), 7.31 (d, *J* = 7.6 Hz, 1 H), 7.17 (d, *J* = 8.4 Hz, 1 H), 7.13 (t, *J* = 7.6 Hz, 1 H), 6.87 (dd, *J* = 8.4 Hz, *J* = 2.0 Hz, 1 H), 4.25 (q, *J* = 7.2 Hz, 2 H), 3.55 (br s, 2 H), 1.35 (t, *J* = 7.2 Hz, 3 H). **<sup>13</sup>C NMR** (100 MHz, CDCl<sub>3</sub>) δ: 140.3, 139.0, 134.4, 125.4, 123.6, 122.4, 120.4, 118.0, 115.5, 109.0, 108.3, 106.3, 37.4, 13.8. **IR** (neat cm<sup>-1</sup>) 3412, 3332, 2973, 1606, 1492, 1468, 1327, 1227, 1147, 802, 747. **HRMS** (ESI) Calcd for C<sub>14</sub>H<sub>14</sub>N<sub>2</sub> [M+H]: 211.1230. Found: 211.1221.

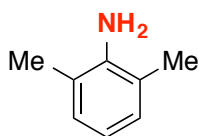

**2,6-Dimethylaniline (6a).**<sup>51</sup> Following procedure B, the title compound was prepared using 2-chloro-1,3-xylene (140.6 mg, 133 μL, 1.0 mmol) at 100 °C. After work up the crude product was purified by flash chromatography with silica gel using EtOAc/hexanes (1:15) as an eluent to afford 2,6-dimethylaniline (**6a**) (86.1 mg, 0.71 mmol, 71%) as a brown oil. The 1° : 2° ratio was determined to be 29:1 of the isolated product mixture based on 0.25 mmol aryl halide; a trace of reduced product xylene was also detected by GC/MS analysis. **<sup>1</sup>H NMR** (400 MHz, CDCl<sub>3</sub>) δ: 6.93 (d, *J* = 7.6 Hz, 2 H), 6.63 (t, *J* = 7.6 Hz, 1 H), 3.53 (br s, 2 H), 2.16 (s, 6 H). **<sup>13</sup>C NMR** (100 MHz, CDCl<sub>3</sub>) δ: 142.8, 128.3, 121.8, 118.1, 17.7. **IR** (neat cm<sup>-1</sup>) 3386, 2966, 2919, 2853, 1617, 1474, 1272, 1089, 756, 733. **HRMS** (ESI) Calcd for C<sub>8</sub>H<sub>11</sub>N [M+H]: 122.0964; Found: 122.0964.

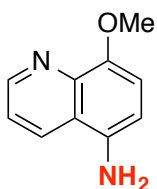

**5-Amino-8-methoxyquinoline (6b).**<sup>52</sup> Following the general procedure B, the title compound was prepared using 5-chloro-8-methoxyquinoline (**S9**) (193.6 mg, 1.0 mmol) at 100 °C. After work up the crude product was purified by flash chromatography with silica gel (initially eluted with hexanes/triethylamine (50:1)) using EtOAc and then EtOAc/MeOH (15:1) as eluents to afford 5-amino-8-methoxyquinoline (**6b**) (160.6 mg, 0.92 mmol, 92%) as a deep-brown solid. **m.p.:** 152-153 °C (lit: 156-158 °C).<sup>52</sup> **<sup>1</sup>H NMR** (400 MHz, CDCl<sub>3</sub>) δ: 8.93-8.91 (m, 1 H), 8.17 (d, *J* = 8.4 Hz, 1 H), 7.40-7.36 (m, 1 H), 6.88 (d, *J* = 8.4 Hz, 1 H), 6.75 (d, *J* = 8.4 Hz, 1 H), 4.01 (s, 3 H), 3.80 (br s, 2 H). **<sup>13</sup>C NMR** (100 MHz, CDCl<sub>3</sub>) δ: 148.8, 148.6, 140.2, 134.9, 129.9, 120.3, 120.2, 110.0, 108.1, 55.8. **IR** (neat cm<sup>-1</sup>)

3318, 3215, 1635, 1475, 1461, 1419, 1365, 1276, 1250, 1098, 1016, 819, 785, 703, 643. **HRMS** (ESI) Calcd for C<sub>10</sub>H<sub>10</sub>N<sub>2</sub>O [M+H]: 175.0866; Found: 175.0858.

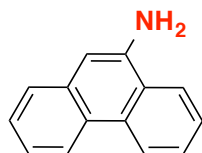

**9-Aminophenanthrene (6c).**<sup>53</sup> Following procedure B, the title compound was prepared using 9-bromophenanthrene (257.1 mg, 1.0 mmol) at 100 °C. After work up the crude product was purified by flash chromatography with silica gel using EtOAc/hexanes (1:6) and then EtOAc/hexanes (1:4) as an eluent to afford 9-aminophenanthrene (**6c**) (159.1 mg, 0.82 mmol, 82%) as a brown solid. A reduced product, phenanthrene, also formed in 8% NMR yield based on 0.25 mmol aryl halide using 1,3,5-trimethoxybenzene as internal standard. **m.p.:** 135-136 °C (lit: 137.5-139 °C).<sup>53</sup> **<sup>1</sup>H NMR** (400 MHz, DMSO-*d*<sub>6</sub>) δ: 8.74 (d, *J* = 7.6 Hz, 1 H), 8.57 (d, *J* = 8.0 Hz, 1 H), 8.23 (d, *J* = 7.6 Hz, 1 H), 7.67-7.62 (ovrlp, 2 H), 7.59 (d, *J* = 8.0 Hz, 1 H), 7.43 (t, *J* = 7.6 Hz, 1 H), 7.29 (t, *J* = 7.6 Hz, 1 H), 6.91 (s, 1 H), 5.80 (br s, 2 H). **<sup>13</sup>C NMR** (100 MHz, DMSO-*d*<sub>6</sub>) δ: 142.5, 133.8, 130.6, 126.8, 126.5, 125.9, 125.4, 125.0, 124.3, 123.1, 122.7, 122.5, 121.9, 103.8. **IR** (neat cm<sup>-1</sup>) 3391, 3322, 1497, 1631, 1607, 1434, 1323, 1236, 1206, 869, 845, 719, 644. **HRMS** (ESI) Calcd for C<sub>14</sub>H<sub>11</sub>N [M+H]: 194.0964; Found: 194.0950.

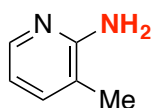

**2-Amino-3-methylpyridine (6d).**<sup>54</sup> Following the general procedure B, the title compound was prepared using 2-chloro-3-methylpyridine (127.6 mg, 109 μL, 1.0 mmol) at 50 °C. After work up the crude product was purified by flash chromatography with silica gel (initially eluted with hexanes/Et<sub>3</sub>N (50:1)) using EtOAc and then EtOAc/MeOH (20:1) as eluents to afford an inseparable pale brown oily mixture of 2-amino-3-methylpyridine (**6d**) (91.9 mg, 0.85 mmol, 85%) and bis(3-methylpyridin-2-yl)amine (**6d'**) (8%). The 1° : 2° ratio was determined to be 11 : 1 in the isolated product mixture. **<sup>1</sup>H NMR** (1°) (400 MHz, CDCl<sub>3</sub>) δ: 7.94 (d, *J* = 4.0 Hz, 1 H), 7.24 (d, *J* = 7.2 Hz, 1 H), 6.59 (dd, *J* = 7.2 Hz, *J* = 4.8 Hz, 1 H), 4.57 (br s, 2 H), 2.10 (s, 3 H). **<sup>13</sup>C NMR** (1°) (100 MHz, CDCl<sub>3</sub>) δ: 157.3, 145.6, 137.7, 116.6, 114.3, 17.1. **IR** (neat cm<sup>-1</sup>) 3324, 3190, 1613, 1594, 1579, 1470, 1451, 1382, 1290, 1196, 1079, 1036, 994, 764. **HRMS** (ESI) Calcd for C<sub>6</sub>H<sub>8</sub>N<sub>2</sub> [M+H] (1°): 109.0760. Found: 109.0760; Calcd for C<sub>12</sub>H<sub>13</sub>N<sub>3</sub> (2°): [M+H]: 200.1182. Found: 200.1168.

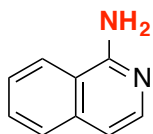

**1-Aminoisoquinoline (6e).**<sup>55</sup>

(i) 50 °C. Following the general procedure B, the title compound was prepared using 1-chloroisoquinoline (163.6 mg, 1.0 mmol) at 50 °C. After work up the crude product was purified by flash chromatography with silica gel (initially eluted with hexanes/triethylamine (50:1)) using EtOAc/hexanes (2:1) followed by EtOAc/hexanes (4:1) and EtOAc/hexanes (10:1) as eluents to afford 1-aminoisoquinoline (**6e**) (109.4 mg, 0.76 mmol, 76%) as a yellow solid. **m.p.:** 119-120 °C (lit: 122-123 °C).<sup>55</sup> **<sup>1</sup>H NMR** (400 MHz, CDCl<sub>3</sub>) δ: 7.94 (d, *J* = 5.6 Hz, 1 H), 7.79 (d, *J* = 8.0 Hz, 1 H), 7.67 (d, *J* =

8.0 Hz, 1 H), 7.58 (t,  $J = 7.6$  Hz, 1 H), 7.44 (t,  $J = 7.6$  Hz, 1 H), 7.02 (d,  $J = 6.0$  Hz, 1 H), 5.49 (br s, 2 H).  $^{13}\text{C}$  NMR (100 MHz,  $\text{CDCl}_3$ )  $\delta$ : 156.5, 141.2, 137.4, 130.2, 127.1, 126.1, 122.7, 117.9, 112.4. IR (neat  $\text{cm}^{-1}$ ) 3486, 3305, 3054, 1639, 1560, 1503, 1434, 1342, 1287, 1259, 1145, 1006, 873, 800, 751, 676. HRMS (ESI) Calcd for  $\text{C}_9\text{H}_8\text{N}_2$  [M+H]: 145.0760; Found: 145.0758.

(ii) rt. Following the general procedure B, the title compound was prepared using 1-chloroisoquinoline (163.6 mg, 1.0 mmol), Pd precatalyst **3b** (45.3 mg, 0.050 mmol), and **L7** (26.8 mg, 0.050 mmol) at room temperature. After work up the crude product was purified by flash chromatography with silica gel (initially eluted with hexanes/triethylamine (50:1)) using EtOAc/hexanes (2:1) followed by EtOAc/hexanes (4:1) and EtOAc/hexanes (10:1) as eluents to afford 1-aminoisoquinoline (**9e**) (116.0 mg, 0.81 mmol, 81%) as a yellow solid. Spectral and analytical data were identical to those reported for the same compound above.

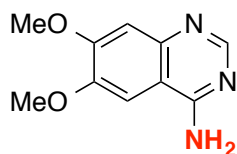

**4-Amino-6,7-dimethoxyquinazoline (6f)**.<sup>56</sup> Following the general procedure B, the title compound was prepared using 4-chloro-6,7-dimethoxyquinazoline (224.6 mg, 1.0 mmol) at 50 °C. After work up the crude product was purified by flash chromatography with alumina using EtOAc followed by EtOAc/MeOH (20:1) and EtOAc/MeOH (15:1) as eluents to afford 4-amino-6,7-dimethoxyquinazoline (**6f**) (176.6 mg, 0.86 mmol, 86%) as a yellow solid. The diarylamine side-product was detected by LC/MS analysis and the 1° : 2° ratio was determined to be 9 : 1 in the crude product based on 0.25 mmol aryl halide. **m.p.**: 201-202 °C (lit: 202 °C).  $^1\text{H}$  NMR (400 MHz,  $\text{DMSO}-d_6$ )  $\delta$ : 8.27 (s, 1 H), 7.57 (s, 1 H), 7.42 (br s, 2 H), 7.07 (s, 1 H), 3.89 (s, 3 H), 3.86 (s, 3 H).  $^{13}\text{C}$  NMR (100 MHz,  $\text{DMSO}-d_6$ )  $\delta$ : 160.5, 154.0, 153.9, 148.2, 146.7, 108.0, 106.9, 102.7, 56.0, 55.7. IR (neat  $\text{cm}^{-1}$ ) 3586, 3302, 3089, 2924, 1665, 1584, 1487, 1435, 1339, 1248, 1218, 1117, 1031, 990, 833, 788. HRMS (ESI) Calcd for  $\text{C}_{10}\text{H}_{11}\text{N}_3\text{O}_2$  [M+H]: 206.0924; Found: 206.0914.

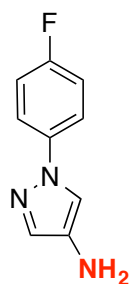

**4-Amino-1-(4-fluorophenyl)-1H-pyrazole (7a)**. An oven-dried 25 mL re-sealable screw-cap test tube (**A**) equipped with a Teflon-coated magnetic stir bar was charged with 4-bromo-1-(4-fluorophenyl)pyrazole (241.1 mg, 1.0 mmol, 1.0 equiv) and sodium *tert*-butoxide (134.5 mg, 1.4 mmol, 1.4 equiv). Tube **A** was evacuated and backfilled with argon (this sequence was repeated a total of three times), and ammonia solution (0.5 M in 1,4-dioxane, 6.0 mL, 3.0 mmol, 3.0 equiv) was then added into tube **A** via syringe. Simultaneously, an oven-dried 10 mL re-sealable screw-cap test tube (**B**) equipped with a Teflon-coated magnetic stir bar was charged with  $\text{Pd}_2\text{dba}_3$  (9.2 mg, 0.01 mmol, 0.01 equiv) and ligand **L4** (25.6 mg, 0.04 mmol, 0.04 equiv). Tube **B** was evacuated and backfilled with argon (this sequence was repeated a total of three times), and 1,4-dioxane (4.0 mL) was then added into tube **B** via syringe. The reaction mixture in tube **B** was stirred at 100 °C in an oil bath for 3 min, after which time

the color of the reaction mixture changed from dark purple to deep brown, indicating the formation of Pd-**L4** catalyst. After cooling to room temperature, the deep brown catalyst solution from tube **B** was transferred into tube **A** via syringe. The reaction mixture in tube **A** was then stirred in an oil bath at 120 °C for 20 h. After cooling to room temperature, the reaction mixture was concentrated *in vacuo* with the aid of a rotary evaporator. The crude product residue was then purified by flash column chromatography with silica gel using EtOAc and then EtOAc/MeOH (15:1) as an eluent to afford 4-amino-1-(4-fluorophenyl)-1*H*-pyrazole (**7a**) (153.3 mg, 0.86 mmol, 86%) as a brown solid (78% <sup>1</sup>H NMR yield based on 0.25 mmol heteroaryl halide using 1,3,5-trimethoxybenzene as internal standard). Note: the conversion was incomplete when catalyst system **3c/L4** was used based on 0.25 mmol heteroaryl halide. **m.p.:** 86-87 °C. **<sup>1</sup>H NMR** (400 MHz, CDCl<sub>3</sub>) δ: 7.54 (dd, <sup>3</sup>J<sub>HH</sub> = 8.8 Hz, <sup>4</sup>J<sub>HF</sub> = 4.8 Hz, 2 H), 7.43 (s, 1 H), 7.37 (s, 1 H), 7.09 (dd, <sup>3</sup>J<sub>HH</sub> = 8.8 Hz, <sup>3</sup>J<sub>HF</sub> = 8.8 Hz, 2 H), 3.06 (br s, 2 H). **<sup>13</sup>C NMR** (100 MHz, CDCl<sub>3</sub>) δ: 160.5 (d, <sup>1</sup>J<sub>CF</sub> = 243.1 Hz), 136.7 (d, <sup>4</sup>J<sub>CF</sub> = 2.6 Hz), 133.4, 131.3, 119.8 (d, <sup>3</sup>J<sub>CF</sub> = 8.1 Hz), 116.0 (d, <sup>2</sup>J<sub>CF</sub> = 22.7 Hz), 114.6. **IR** (neat cm<sup>-1</sup>) 3399, 3286, 3197, 3130, 1588, 1514, 1398, 1367, 1225, 1091, 1011, 949, 832, 809, 647. **Anal.** Calcd. for C<sub>9</sub>H<sub>8</sub>FN<sub>3</sub>: C, 61.01; H, 4.55; Found: C, 61.26; H, 4.63.

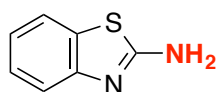

**2-Aminobenzothiazole (7b).**<sup>57</sup> Following the general procedure C, the title compound was prepared using 2-chlorobenzothiazole (169.6 mg, 130 μL, 1.0 mmol), precatalyst **3c** (50.5 mg, 0.050 mmol), **L4** (32.0 mg, 0.050 mmol), and 1,4-dioxane (1 mL) at room temperature. After work up the crude product was purified by flash chromatography with silica gel using EtOAc/hexanes (1:2) and then EtOAc/hexanes (2:1) as eluents to afford 2-aminobenzothiazole (**7b**) (144.5 mg, 0.96 mmol, 96%) as a pale-brown solid. **m.p.:** 128-129 °C (lit: 125-127 °C).<sup>57</sup> **<sup>1</sup>H NMR** (400 MHz, DMSO-*d*<sub>6</sub>) δ: 7.64 (d, *J* = 8.0 Hz, 1 H), 7.44 (br s, 2 H), 7.33 (d, *J* = 8.0 Hz, 1 H), 7.20 (td, *J* = 8.0 Hz, *J* = 0.8 Hz, 1 H), 6.99 (td, *J* = 8.0 Hz, *J* = 0.8 Hz, 1 H). **<sup>13</sup>C NMR** (100 MHz, DMSO-*d*<sub>6</sub>) δ: 166.4, 152.8, 130.9, 125.4, 120.85, 120.78, 117.7. **IR** (neat cm<sup>-1</sup>) 3388, 3055, 1639, 1524, 1443, 1307, 1283, 1103, 888, 739, 719. **HRMS** (ESI) Calcd for C<sub>7</sub>H<sub>8</sub>N<sub>2</sub>S [M+H]: 151.0324; Found: 151.0318.

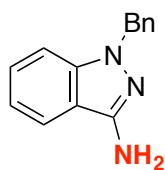

**3-Amino-1-benzyl-1*H*-indazole (7c).**<sup>58</sup> Following the general procedure C, the title compound was prepared using 1-benzyl-3-chloro-1*H*-indazole (**S6**) (242.7 mg, 1.0 mmol) at 80 °C. After work up the crude product was purified by flash chromatography with silica gel using EtOAc/hexanes (1:1) and then EtOAc/hexanes (2:1) as eluents to afford 3-amino-1-benzyl-1*H*-indazole (**7c**) (175.8 mg, 0.79 mmol, 79%) as a brown solid. A trace of reduced product, 1-benzyl-1*H*-indazole, formed based on 0.25 mmol heteroaryl halide as detected by GC/MS. **m.p.:** 116-117 °C (lit: 111-113 °C).<sup>58</sup> **<sup>1</sup>H NMR** (400 MHz, CDCl<sub>3</sub>) δ: 7.52 (dt, *J* = 8.4 Hz, *J* = 0.8 Hz, 1 H), 7.31-7.20 (ovrlp, 4 H), 7.19-7.15 (ovrlp, 3 H), 7.00 (ddd, *J* = 8.0 Hz, *J* = 6.8 Hz, *J* = 0.8 Hz, 1 H), 5.34 (s, 2 H), 4.11 (br s, 2 H). **<sup>13</sup>C NMR** (100 MHz, CDCl<sub>3</sub>) δ: 147.5, 141.4, 137.6, 128.7, 127.6, 127.14, 127.13, 119.7, 118.8, 115.1, 109.0, 52.2. **IR** (neat cm<sup>-1</sup>) 3432, 3301, 3196, 1623, 1541, 1493, 1438, 1353, 1307, 1264, 1082, 1027, 950, 815, 762, 744, 699. **HRMS** (ESI) Calcd for C<sub>14</sub>H<sub>13</sub>N<sub>3</sub> [M+H]: 224.1182; Found: 224.1161.

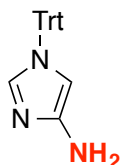

**4-Amino-1-trityl-1H-imidazole (7d).** Following the general procedure C, the title compound was prepared using 4-bromo-1-trityl-1H-imidazole (**S3**) (389.3 mg, 1.0 mmol) at 80 °C. After work up the crude product was purified by flash chromatography with silica gel (initially eluted with hexanes/triethylamine (50:1)) using EtOAc and then EtOAc/MeOH (12:1) as eluents to afford 4-amino-1-trityl-1H-imidazole (**7e**) (294.3 mg, 0.90 mmol, 90%) as a deep-brown solid. **m.p.:** 196 °C. **<sup>1</sup>H NMR** (400 MHz, CDCl<sub>3</sub>) δ: 7.33-7.30 (ovrlp, 9 H), 7.19-7.14 (m, 6 H), 7.09 (d, *J* = 1.6 Hz, 1 H), 6.08 (d, *J* = 1.6 Hz, 1 H), 3.29 (br s, 2 H). **<sup>13</sup>C NMR** (100 MHz, CDCl<sub>3</sub>) δ: 144.7, 142.6, 135.2, 129.9, 128.04, 128.00, 103.8, 75.2. **IR** (neat cm<sup>-1</sup>) 3412, 3297, 3052, 1569, 1489, 1442, 1378, 1241, 1140, 1084, 1036, 990, 907, 870, 751, 699, 638, 654. **HRMS** (ESI) Calcd for C<sub>22</sub>H<sub>19</sub>N<sub>3</sub> [M+H]: 326.1652; Found: 326.1659.

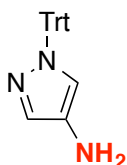

**4-Amino-1-trityl-1H-pyrazole (7e).** Following the general procedure C, the title compound was prepared using 4-bromo-1-trityl-1H-pyrazole (**S4**) (389.3 mg, 1.0 mmol) at 100 °C. After work up the crude product was purified by flash chromatography with silica gel using EtOAc/hexanes (1:1) followed by EtOAc/hexanes (4:1) as eluents to afford 4-amino-1-trityl-1H-pyrazole (**7e**) (279.8 mg, 0.79 mmol, 79%) as an off-white solid. A small amount of reduced product, 1-benzyl-1H-indazole (9% NMR yield), formed based on 0.25 mmol heteroaryl halide using 1,3,5-trimethoxybenzene as internal standard. **m.p.:** 206-207 °C. **<sup>1</sup>H NMR** (400 MHz, CDCl<sub>3</sub>) δ: 7.31 (d, *J* = 0.8 Hz, 1 H), 7.30-7.27 (ovrlp, 9 H), 7.18-7.13 (m, 6 H), 7.94 (d, *J* = 0.8 Hz, 1 H), 2.84 (br s, 2 H). **<sup>13</sup>C NMR** (100 MHz, CDCl<sub>3</sub>) δ: 143.5, 132.1, 130.3, 127.8, 127.73, 127.67, 121.7, 78.4. **IR** (neat cm<sup>-1</sup>) 3408, 3338, 3056, 1582, 1492, 1443, 1347, 1181, 990, 903, 874, 815, 748, 698, 638. **HRMS** (ESI) Calcd for C<sub>22</sub>H<sub>19</sub>N<sub>3</sub> [M+H]: 326.1652; Found: 326.1647.

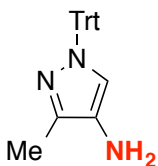

**4-Amino-3-methyl-1-trityl-1H-pyrazole (7f).** Following the general procedure C, the title compound was prepared using 4-bromo-3-methyl-1-trityl-1H-pyrazole (**S7**) (403.3 mg, 1.0 mmol) at 100 °C. After work up the crude product was purified by flash chromatography with silica gel using EtOAc/hexanes (1:1) and then EtOAc/hexanes (4:1) as eluents to afford 4-amino-3-methyl-1-trityl-1H-pyrazole (**7f**) (170.7 mg, 0.50 mmol, 50%) as a brown solid. **m.p.:** 191-192 °C. **<sup>1</sup>H NMR** (400 MHz, CDCl<sub>3</sub>) δ: 7.28-7.24 (ovrlp, 9 H), 7.18-7.14 (m, 6 H), 6.83 (s, 1 H), 2.67 (br s, 2 H), 2.17 (s, 3 H). **<sup>13</sup>C NMR** (100 MHz, CDCl<sub>3</sub>) δ: 143.8, 140.1, 130.2, 127.7, 127.5, 125.3, 122.2, 77.8, 11.1. **IR** (neat cm<sup>-1</sup>) 3408, 3337, 3061, 1584, 1491, 1443, 1352, 1218, 1182, 1082, 1035, 998, 902, 874, 755, 698, 733, 641. **HRMS** (ESI) Calcd for C<sub>23</sub>H<sub>21</sub>N<sub>3</sub> [M+H]: 340.1808; Found: 340.1814.

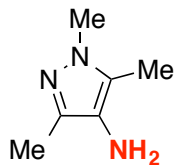

**4-Amino-1,3,5-trimethyl-1H-pyrazole (7g).**<sup>59</sup> Following the general procedure B, the title compound was prepared using 4-bromo-1,3,5-trimethyl-1H-pyrazole (189.1 mg, 1.0 mmol) at 100 °C. After work up the crude product was purified by flash chromatography with alumina using EtOAc/hexanes (1:1) followed by EtOAc/hexanes (3:2) and EtOAc/hexanes (4:1) as eluents to afford 4-amino-1,3,5-trimethyl-1H-pyrazole (**7g**) (50.4 mg, 0.40 mmol, 40%) as a brown solid. The yield of **7g** was determined to be 78% (NMR yield) and a small amount of 1,3,5-trimethyl-1H-pyrazole (9% NMR yield) also formed based on 0.25 mmol heteroaryl halide using 1,3,5-trimethoxybenzene as internal standard. **m.p.:** 97-99 °C (lit: 98 °C).<sup>59</sup> **<sup>1</sup>H NMR** (400 MHz, CDCl<sub>3</sub>) δ: 3.66 (s, 3 H), 2.52 (br s, 2 H), 2.15 (s, 3 H), 2.13 (s, 3 H). **<sup>13</sup>C NMR** (100 MHz, CDCl<sub>3</sub>) δ: 138.6, 128.0, 122.7, 36.1, 10.8, 8.8. **IR** (neat cm<sup>-1</sup>) 3343, 3204, 2922, 1588, 1475, 1444, 1360, 1314, 1232, 988, 861, 803, 680, 613. **HRMS** (ESI) Calcd for C<sub>6</sub>H<sub>11</sub>N<sub>3</sub> [M+H]: 126.1026; Found: 126.1026.

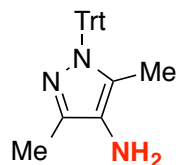

**4-Amino-3,5-dimethyl-1-trityl-1H-pyrazole (7h).** Following the general procedure B, the title compound was prepared using 4-bromo-3,5-dimethyl-1-trityl-1H-pyrazole (**S8**) (417.3 mg, 1.0 mmol) at 110 °C. After work up the crude product was purified by flash chromatography with silica gel using EtOAc/hexanes (1:1) and then EtOAc as eluents to afford 4-amino-3,5-dimethyl-1-trityl-1H-pyrazole (**7h**) (291.2 mg, 0.82 mmol, 82%) as an off-white solid. A small amount of reduced product, 3,5-dimethyl-1-trityl-1H-pyrazole (8% NMR yield), also formed based on 0.25 mmol heteroaryl halide using 1,3,5-trimethoxybenzene as internal standard. **m.p.:** 211-212 °C. **<sup>1</sup>H NMR** (400 MHz, DMSO-*d*<sub>6</sub>) δ: 7.31-7.22 (ovrlp, 9 H), 7.04-7.01 (m, 6 H), 3.45 (br s, 2 H), 1.99 (s, 3 H), 1.30 (s, 3 H). **<sup>13</sup>C NMR** (100 MHz, DMSO-*d*<sub>6</sub>) δ: 143.4, 135.3, 129.8, 127.4, 127.3, 126.9, 126.1, 76.8, 11.7, 11.3. **IR** (neat cm<sup>-1</sup>) 3408, 3336, 2921, 1596, 1490, 1444, 1336, 1267, 1211, 1035, 1000, 895, 759, 744, 708, 697, 667, 642. **HRMS** (ESI) Calcd for C<sub>24</sub>H<sub>23</sub>N<sub>3</sub> [M+H]: 354.1965; Found: 354.1970.

**Control Experiments for Palladium-Catalyzed Arylation of Ammonia (Scheme S2).** An oven-dried 15 mL re-sealable screw-cap test tube equipped with a Teflon-coated magnetic stir bar was charged with ligand (**L6**, **L7**, or **L4**; 0.005 mmol, 0.02 equiv), sodium *tert*-butoxide (33.6 mg, 0.35 mmol, 1.4 equiv), and (hetero)aryl halide (if solid) (0.25 mmol, 1.0 equiv). The tube was then evacuated and backfilled with argon (this sequence was repeated a total of three times). Ammonia solution (0.5 M in 1,4-dioxane, 1.5 mL, 3.0 equiv), 1,4-dioxane (1.0 mL), and (hetero)aryl halide (if liquid) (0.25 mmol, 1.0 equiv) were then added into the tube via syringe. The reaction mixture was stirred at an elevated temperature in an oil bath or at room temperature for 24 h. After cooling to room temperature, ethyl acetate (~4 mL) was added into the reaction mixture, and a portion of the reaction mixture was analyzed for the existence of the arylamine product by (i) GC/MS analysis, (ii) TLC analysis by comparing with the authentic samples, or (iii) <sup>1</sup>H NMR spectroscopy using 1,3,5-trimethoxybenzene (14.0 mg, 0.083 mmol, 0.33 equiv) as internal standard.

**Additional Results for the Selective Palladium-Catalyzed Arylation of Ammonia (Scheme S3).** An oven-dried 15 mL re-sealable screw-cap test tube (**A**) equipped with a Teflon-coated magnetic stir bar was charged with ligand (**L6** or **L7**; 0.005 mmol, 0.02 equiv), sodium *tert*-butoxide (33.6 mg, 0.35 mmol, 1.4 equiv), and (hetero)aryl halide (if solid) (0.25 mmol, 1.0 equiv). Tube **A** was evacuated and backfilled with argon (this sequence was repeated a total of three times), and ammonia solution (0.5 M in 1,4-dioxane, 1.5 mL, 3.0 equiv) and (hetero)aryl halide (if liquid) (0.25 mmol, 1.0 equiv) were then added into the tube via syringe. Simultaneously, an oven-dried 10 mL re-sealable screw-cap test tube (**B**) equipped with a Teflon-coated magnetic stir bar was charged with Pd precatalyst (**3a** or **3b**; 0.005 mmol, 0.02 equiv). Tube **B** was then evacuated and backfilled with argon (this sequence was repeated a total of three times), and 1,4-dioxane (1.0 mL) was added into the tube via syringe. The reaction mixture in tube **B** was stirred at room temperature for ~1 min to form a homogeneous solution. The precatalyst solution from tube **B** was transferred into tube **A** via syringe. The reaction mixture in tube **A** was stirred at the required temperature (50 °C, 60 °C, 80 °C, or 100 °C) in an oil bath for 20 or 24 h. After cooling to room temperature, ethyl acetate (~4 mL) and 1,3,5-trimethoxybenzene (14.0 mg, 0.083 mmol, 0.33 equiv) were added into the reaction mixture. A portion of reaction mixture was concentrated *in vacuo* with the aid of a rotary evaporator to give crude product. The yield of arylamine product was determined by <sup>1</sup>H NMR spectroscopy using 1,3,5-trimethoxybenzene as internal standard.

## References:

- (1) Lundgren, R. J.; Peters, B. D.; Alsabeh, P. G.; Stradiotto, M. *Angew. Chem. Int. Ed.* **2010**, *49*, 4071–4074.
- (2) Hoshiya, N.; Buchwald, S. L. *Adv. Synth. Catal.* **2012**, *354*, 2031-2037.
- (3) Su, M.; Buchwald, S. L. *Angew. Chem. Int. Ed.* **2012**, *51*, 4710-4713.
- (4) Bruno, N. C.; Tudge, M. T.; Buchwald, S. L. *Chem. Sci.* **2013**, *4*, 916-920.
- (5) Bruno, N. C.; Buchwald, S. L. *Org. Lett.* **2013**, DOI. 10.1021/ol401208t.
- (6) Salvi, L.; Davis, N. R.; Ali, S. Z.; Buchwald, S. L. *Org. Lett.* **2012**, *14*, 170-173.
- (7) Roumen, L.; Peeters, J. W.; Emmen, J. M. A.; Beugels, I. P. E.; Custers, E. M. G.; de Gooyer, M.; Plate, R.; Pieterse, K.; Hilbers, P. A. J.; Smits, J. F. M.; Vekemans, J. A. J.; Leysen, D.; Ottenheijm, H. C. J.; Janssen, H. M.; Hermans, J. J. R. *J. Med. Chem.* **2010**, *53*, 1712–1725.
- (8) Anderson E. D.; Boger, D. L. *J. Am. Chem. Soc.* **2011**, *133*, 12285–12292.

- (9) Pd<sub>2</sub>dba<sub>3</sub> and ligand were allowed to premix in 1,4-dioxane at 100 °C for 3 min to form a ligated palladium catalyst prior to the reaction in order to enhance the catalytic activity of Pd. See: Ueda, S.; Su, M. Buchwald, S. L. *J. Am. Chem. Soc.*, **2012**, *134*, 700–706.
- (10) The transfer was carried out via syringe. However, the procedure should be carried as written as it is much safer!
- (11) Young, J.; Czako, B.; Altman, M.; Guerin, D.; Martinez, M.; Rivkin, A.; Wilson, K.; Lipford, K.; White, C.; Surdi, L.; Chichetti, S.; Daniels, M. H.; Ahearn, S. P.; Falcone, D.; Osimboni, E. *PCT Int. Appl.*, 2011084402, 14 Jul 2011.
- (12) Kmonicek, V.; Svatek, E.; Holubek, J.; Protiva, M. *Coll. Czech. Chem. Commun.* **1986**, *51*, 937-947.
- (13) García, N.; García-García, P.; Fernández-Rodríguez, M. A.; Rubio, R.; Pedrosa, M. R.; Arnáiz, F. J.; Sanz, R. *Adv. Synth. Catal.* **2012**, *354*, 321-327.
- (14) Zeng, X.; Huang, W.; Qiu, Y.; Jiang, S. *Org. Biomol. Chem.* **2011**, *9*, 8224-8227.
- (15) Lothian, A. P.; Ramsden, C. A.; Shaw, M. M.; Smith, R. G. *Tetrahedron* **2011**, *67*, 2788-2793.
- (16) Yang, H.; Li, Y.; Jiang, M.; Wang, J.; Fu, H. *Chem. Eur. J.* **2011**, *17*, 5652-5660.
- (17) Altman, R. A.; Shafir, A.; Choi, A.; Lichtor, P. A.; Buchwald, S. L. *J. Org. Chem.* **2008**, *73*, 284-286.
- (18) Thakur, K. G.; Ganapathy, D.; Sekar, G. *Chem. Commun.* **2011**, *47*, 5076–5078.
- (19) Shukla, J. S.; Ahmad, I. *J. Indian Chem. Soc.* **1980**, *57*, 950-953.
- (20) Maddani, M. R.; Moorthy, S. K.; Prabhu, K. R. *Tetrahedron* **2010**, *66*, 329-333.
- (21) Kormos, C. M.; Leadbeater, N. E. *J. Org. Chem.* **2008**, *73*, 3854–3858.
- (22) Ma, H.-C.; Jiang X.-Z. *J. Org. Chem.* **2007**, *72*, 8943-8946.
- (23) Zhu, L.; Cheng, L.; Zhang, Y.; Xie, R.; You, J. *J. Org. Chem.* **2007**, *72*, 2737-2743.
- (24) Venuti, M. C.; Stephenson, R. A.; Alvarez, R.; Bruno, J. J.; Strosberg, A. M. *J. Med. Chem.* **1988**, *31*, 2136-2145.
- (25) Zhang, Y.; Chen, L.-Y.; Yin, W.-X.; Yin, J.; Zhang, S.-B.; Liu, C.-L. *Dalton Trans.* **2011**, *40*, 4830-4833.
- (26) Mann, F. G.; Turnbull, J. H. *J. Chem. Soc.* **1951**, 747-756.
- (27) Sugawara, S.; Ishikawa N. *Kogyo Kagaku Zasshi* **1969**, *72*, 2425-2429.



- (28) Yazdanbakhsh, M. R.; Mahmoodi, N. O.; Dabiry, S. *Mendeleev Commun.* **2006**, *3*, 192-194.
- (29) Lee, J. G.; Choi, K. I.; Koh, H. Y.; Kim, Y.; Kang, Y.; Cho, Y. S. *Synthesis* **2001**, *1*, 81-84.
- (30) Adams, R.; Samuels, W. P. Jr. *J. Am. Chem. Soc.* **1955**, *77*, 5383-5385.
- (31) Haydon, D. J.; Bennett, J. M.; Brown, J. M.; Collins, I.; Galbraith, G.; Lancett, P.; Macdonald, R.; Stokes, N. R.; Chauhan, P. K.; Sutariya, J. K.; Nayal, N.; Srivastava, A.; Beanland, J.; Hall, R.; Henstock, V.; Noula, C.; Rockley, C.; Czaplewski, L. *J. Med. Chem.* **2010**, *53*, 3927–3936.
- (32) Oguro, Y.; Miyamoto, N.; Takagi, T.; Okada, K.; Awazu, Y.; Miki, H.; Hori, A.; Kamiyama, K.; Imamura, S. *Bioorg. Med. Chem.* **2010**, *18*, 7150–7163.
- (33) Elmkaddem, M. K.; Fischmeister, C.; Thomas, C. M.; Renaud, J.-R. *Chem. Commun.* **2010**, *46*, 925–927.
- (34) Wachi, K.; Terada, A. *Chem. Pharm. Bull.* **1980**, *28*, 465-467.
- (35) Wright, S. W. *J. Heterocycl. Chem.* **2012**, *49*, 442-445.
- (36) Lappin, G. R.; Slezak, F. B. *J. Am. Chem. Soc.* **1950**, *72*, 2806-2807.
- (37) Hauser, C. R.; Weiss, M. J. *J. Org. Chem.* **1949**, *14*, 310-321.
- (38) Messaoudi, S.; Brion, J.-D.; Alami, M. *Adv. Synth. Catal.* **2010**, *352*, 1677–1687.
- (39) Alford, E. J.; Schofield, K. *J. Chem. Soc.* **1953**, 1811-1817.
- (40) Rahaim, R. J. Jr.; Maleczka, R. E. Jr. *Synthesis* **2006**, *19*, 3316-3340.
- (41) Fletcher, T. L.; Namkung, M. J. *J. Org. Chem.* **1958**, *23*, 680-683.
- (42) Derdau, V.; Atzrodt, J.; Zimmermann, J.; Kroll, C.; Brückner, F. *Chem. Eur. J.* **2009**, *15*, 10397–10404.
- (43) Hansch, C.; Schmidhalter, B.; Reiter, F.; Saltonstall, W. *J. Org. Chem.* **1956**, *21*, 265-270.
- (44) Hrobárik, P.; Sigmundová, I.; Zahradník, P.; Kasák, P.; Arion, V.; Franz, E.; Clays, K. *J. Phys. Chem. C* **2010**, *114*, 22289-22302.
- (45) Fletcher, S. R.; Hollingworth, G. J.; Jones, A. B.; Moyes, C. R.; Rogers, L. *PCT Int. Appl.*, 2005028445, 31 Mar 2005.
- (46) Rauws, T. R. M.; Biancalani, C.; De Schutter, J. W.; Maes, B. U. W. *Tetrahedron* **2010**, *66*, 6958-6964.

- (47) Petering, H. G.; Van Giessen, G. J. *J. Org. Chem.* **1961**, *26*, 2818-2821.
- (48) Hayes, R.; Schofield, J. M.; Smalley, R. K.; Scopes, D. I. C. *Tetrahedron* **1990**, *46*, 2089-2096.
- (49) Fisher, H. J.; Johnson, T. B. *J. Am. Chem. Soc.* **1932**, *54*, 727-732.
- (50) Lindemann, H. *Ber. Dtsch. Chem. Ges. B.* **1924**, *57B*, 555-559.
- (51) Liesen, A. P.; Silva, A. T.; Sousa, J. C.; Menezes, P. H.; Oliveira, R. A. *Tetrahedron Lett.* **2012**, *53*, 4240-4242.
- (52) Khan, M. S.; LaMontagne, M. P. *J. Med. Chem.* **1979**, *22*, 1005-1008.
- (53) Tempesti, T. C.; Pierini, A. B.; Baumgartner, M. T. *J. Org. Chem.* **2005**, *70*, 6508-6511.
- (54) Elmekdem, M. K.; Fischmeister, C.; Thomas, C. M.; Renaud, J.-R. *Chem. Commun.* **2010**, *46*, 925-927.
- (55) Bergstrom, F. W.; Sturz, H. G.; Tracy, H. W. *J. Org. Chem.* **1946**, *11*, 239-246.
- (56) Loidreau, Y.; Besson, T. *Tetrahedron* **2011**, *67*, 4852-4857.
- (57) Wu, Y.-Q.; Limburg, D. C.; Wilkinson, D. E.; Hamilton, G. S. *J. Heterocyclic Chem.* **2003**, *40*, 191-193.
- (58) Lefebvre, V.; Cailly, T.; Fabis, F.; Rault, S. *J. Org. Chem.* **2010**, *75*, 2730-2732.
- (59) Rollas, S.; Ergenc, N.; Oral, B.; Kaymakcioglu, B. K.; Ozaltin, E. *J. Fac. Pharm. Istanbul* **2006**, *38*, 71-78.

## List of Spectra of Compounds

| <b><sup>1</sup>H, <sup>13</sup>C, and <sup>31</sup>P NMR Spectra</b> | <b>Page no.</b> |
|----------------------------------------------------------------------|-----------------|
| Starting Materials - Heteroaryl Halides ( <b>S6-S9</b> )             | S44             |
| Biaryl Phosphine Ligands ( <b>L6-L9</b> )                            | S49             |
| Aminobiphenyl Palladacycle Precatalyst ( <b>3a,3b</b> )              | S57             |
| Arylamine products – Anilines ( <b>4a-4u</b> )                       | S61             |
| Arylamine products – Six-Membered Heteroarylamines ( <b>5a-5t</b> )  | S84             |
| Arylamine products –Sterically Hindered Arylamines ( <b>6a-6f</b> )  | S104            |
| Arylamine products – Five-Membered Heteroarylamines ( <b>7a-7i</b> ) | S110            |

<sup>1</sup>H and <sup>13</sup>C NMR of 2-chloro-5-(2-methoxyethoxy)pyrimidine (S5)

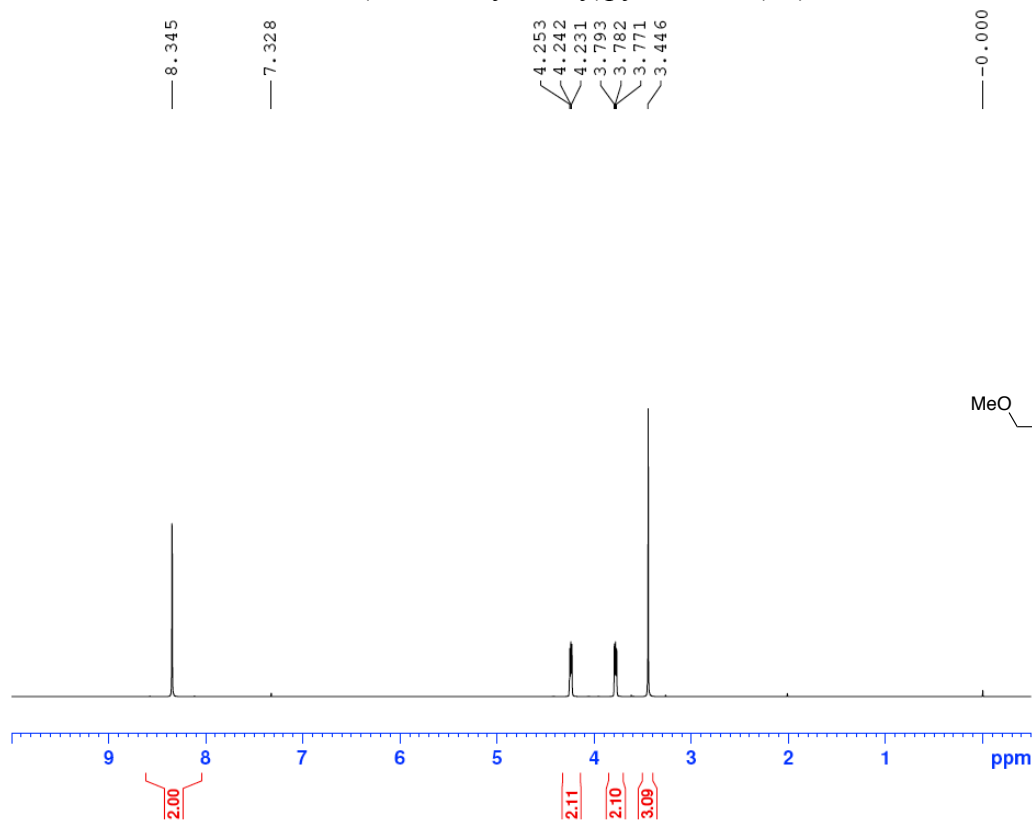

```

Current Data Parameters
NAME      CMC-VI-101-seq (M1)
EXPNO    1
PROCNO   1

F2 - Acquisition Parameters
Date_    20121212
Time     23.30
INSTRUM  spect
PROBHD   5 mm PABBO BBO/
PULPROG  zgpg30
TD       65536
SOLVENT  CDCl3
NS       2
DS       2
SWH      8012.820 Hz
FIDRES   0.122266 Hz
AQ       4.0894465 sec
RG       32
OW       62.400 usec
DE       6.50 usec
TE       298.1 K
D1       1.00000000 sec
TD0      1

----- CHANNEL f1 -----
SFO1    400.1324710 MHz
NUC1     1H
P1       14.50 usec
PLM1    10.00000000 W

F2 - Processing parameters
SI       65536
SF       400.1299823 MHz
WDW      EM
SSB      0
LB       0.30 Hz
GB       0
PC       1.00
    
```

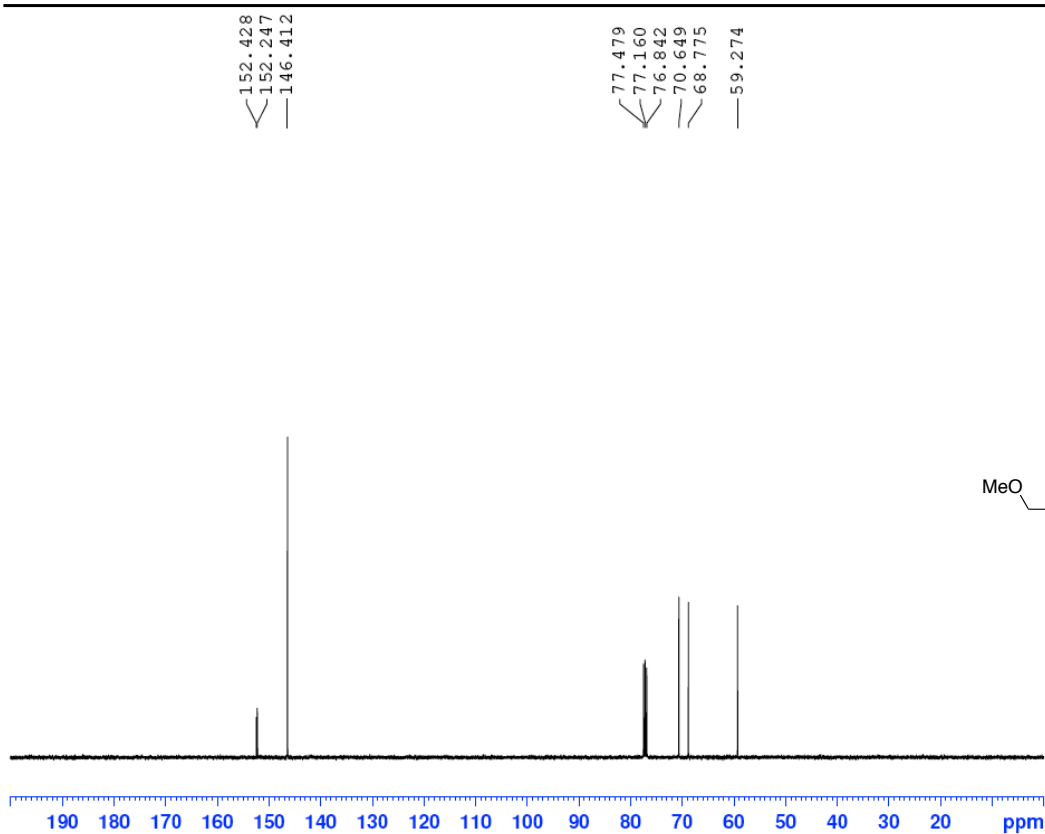

```

Current Data Parameters
NAME      CMC-VI-101-seq (L13)
EXPNO    1
PROCNO   1

F2 - Acquisition Parameters
Date_    20121212
Time     23.30
INSTRUM  spect
PROBHD   5 mm PABBO BBO/
PULPROG  zgpg30
TD       65536
SOLVENT  CDCl3
NS       2
DS       2
SWH      24038.461 Hz
FIDRES   0.366798 Hz
AQ       1.363148 sec
RG       203
OW       20.800 usec
DE       6.50 usec
TE       298.1 K
D1       2.00000000 sec
D11      0.03000000 sec
TD0      1

----- CHANNEL f1 -----
SFO1    100.628293 MHz
NUC1     13C
P1       10.00 usec
PLM1    44.00000000 W

----- CHANNEL f2 -----
SFO2    400.1316005 MHz
NUC2     1H
CDEPRG2  waltz16
PCPD2    80.00 usec
PLM2    10.00000000 W
PLM12   0.25957000 W
PLM13   0.21025000 W

F2 - Processing parameters
SI       32768
SF       100.617652 MHz
WDW      EM
SSB      0
LB       1.00 Hz
GB       0
PC       1.40
    
```

<sup>1</sup>H and <sup>13</sup>C NMR of 1-benzyl-3-chloro-1*H*-indazole (S6)

7.332  
7.329  
7.315  
7.312  
7.289  
7.280  
7.278  
7.276  
7.273  
7.266  
7.262  
7.259  
7.257  
7.253  
7.249  
7.247  
7.242  
7.238  
7.226  
7.203  
7.198  
7.193  
7.183  
7.179  
7.169  
7.167  
7.152  
7.150  
7.149  
7.146  
7.132  
7.130  
5.481

0.000

```
Current Data Parameters
NAME 00C-VI-66-sep_08 (R1)
EXPNO 1
PROCNO 1
F2 - Acquisition Parameters
Date_ 20121208
Time 22:19
INSTRUM spect
PROBHD 5 mm F4000 BBI/
PULPROG zgpg30
TD 65536
SOLVENT cdc13
NS 38
DS 4
SWH 8012.820 Hz
FIDRES 0.122256 Hz
AQ 4.993465 sec
RG 62.480 umax
DE 6.50 umax
TE 298.2 K
CL 1.00000000 sec
TD0 1
```

```
===== CHANNEL f1 =====
NUC1 13C
P1 14.50 umax
PL1 0.00000000 W
PC - Processing parameters
SI 65536
SF 400.1300000 MHz
WDW EM
SSB 0
LB 0.30 Hz
GB 0
PC 1.00
```

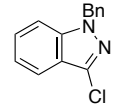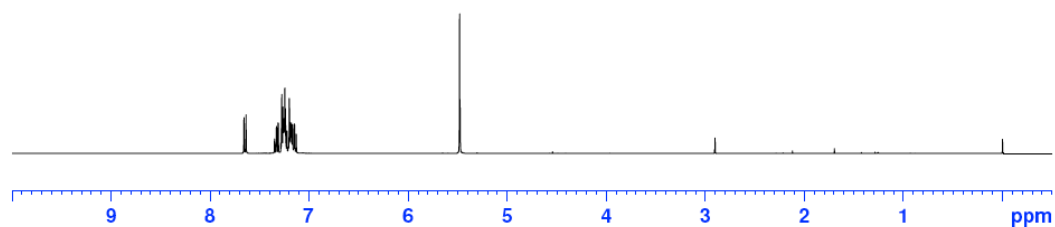

1.00  
1.06  
6.33  
1.15  
2.06

140.909  
136.347  
133.179  
128.856  
128.030  
127.680  
127.332  
121.549  
121.410  
119.894  
109.743

77.477  
77.159  
76.841

53.383

```
Current Data Parameters
NAME 00C-VI-66-sep_08 (R1)
EXPNO 1
PROCNO 1
F2 - Acquisition Parameters
Date_ 20121208
Time 22:34
INSTRUM spect
PROBHD 5 mm F4000 BBI/
PULPROG zgpg30
TD 65536
SOLVENT cdc13
NS 2
DS 4
SWH 24528.461 Hz
FIDRES 0.260794 Hz
AQ 1.343168 sec
RG 62.480 umax
DE 6.50 umax
TE 298.2 K
CL 0.00000000 sec
D11 0.00000000 sec
TD0 1
```

```
===== CHANNEL f1 =====
NUC1 13C
P1 14.50 umax
PL1 0.00000000 W
PC - Processing parameters
SI 65536
SF 400.1300000 MHz
WDW EM
SSB 0
LB 0.30 Hz
GB 0
PC 1.00
```

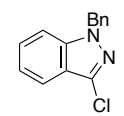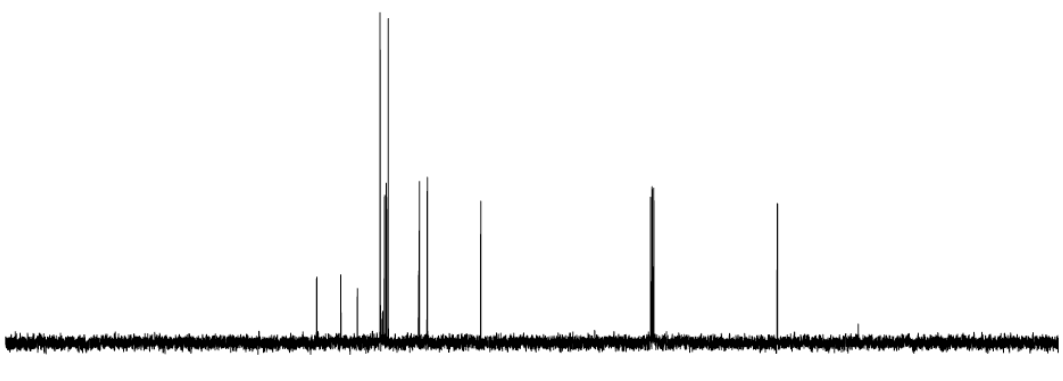

190 180 170 160 150 140 130 120 110 100 90 80 70 60 50 40 30 20 ppm

<sup>1</sup>H and <sup>13</sup>C NMR of 4-bromo-3-methyl-1-trityl-1H-pyrazole (S7)

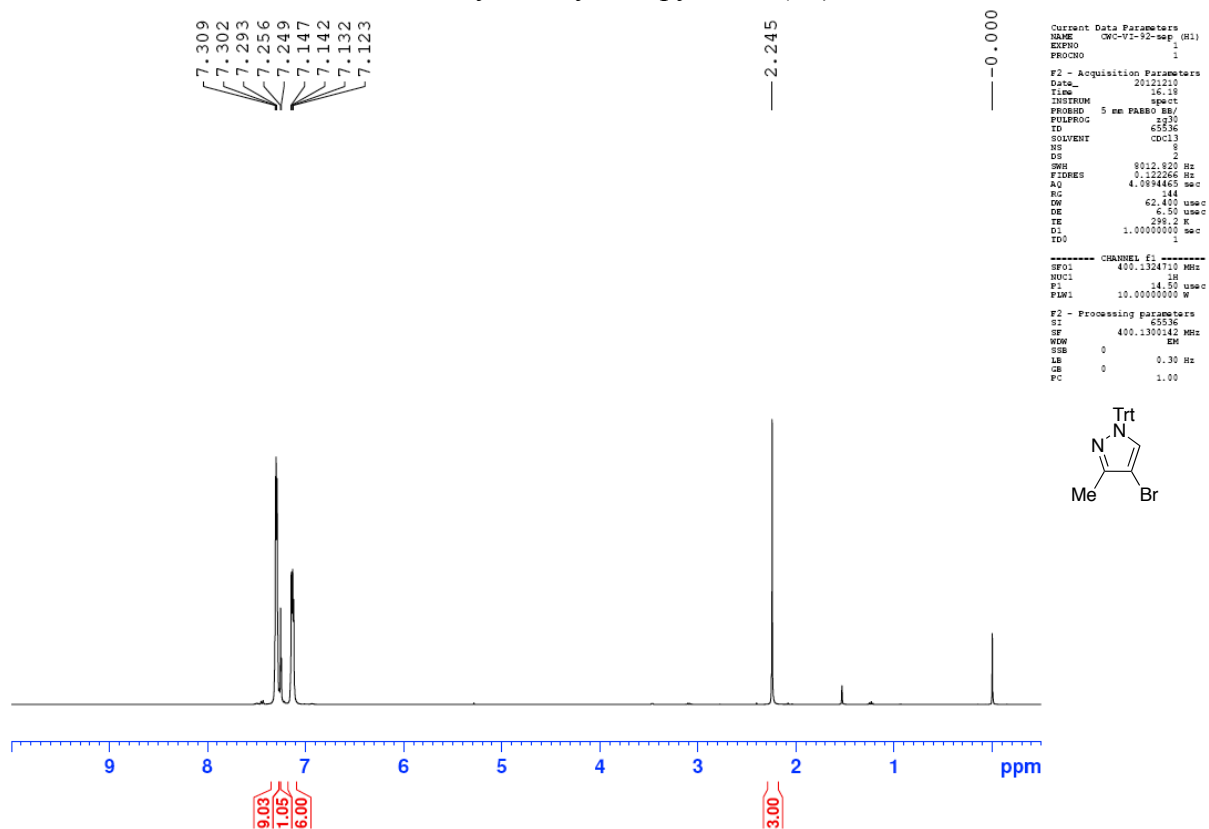

```

Current Data Parameters
NAME CW-VI-92-sep (R1)
EXPNO 1
PROCNO 1
F2 - Acquisition Parameters
Date_ 20121210
Time 15:13
INSTRUM spect
PROBHD 5 mm PABBO BB/
PULPROG zgpg30
TD 65536
SOLVENT ccd13
NS 2
DS 2
SWH 8012.820 Hz
FIDRES 0.122066 Hz
AQ 4.0894465 sec
RG 244
TDW 62.403 usec
DE 6.50 usec
TE 298.15 K
D1 1.00000000 sec
D10 1
----- CHANNEL f1 -----
NUC1 1H
PC1 14.50 usec
PLW1 10.00000000 W
F2 - Processing parameters
SI 65536
SF 400.130143 MHz
WDW EM
SSB 0
LB 0.30 Hz
GB 0
PC 1.00
    
```

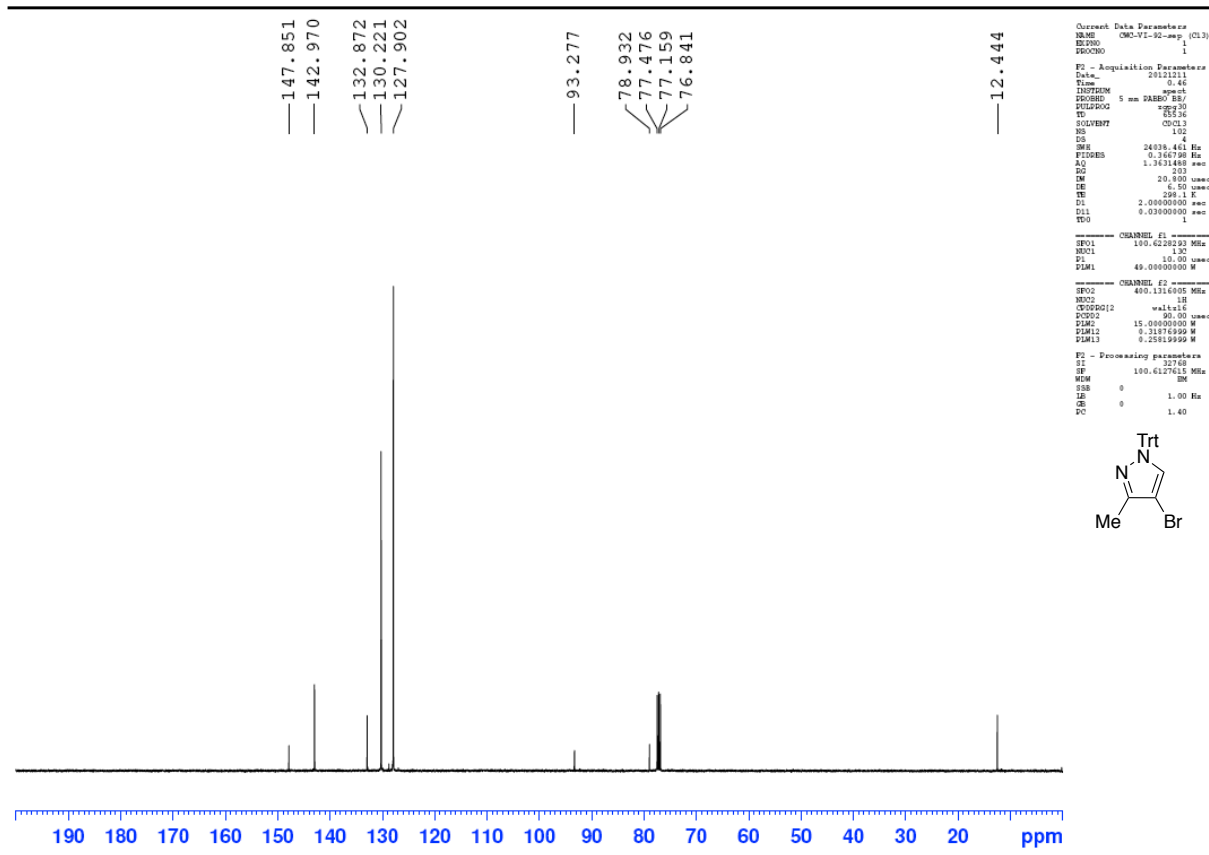

```

Current Data Parameters
NAME CW-VI-92-sep (C13)
EXPNO 1
PROCNO 1
F2 - Acquisition Parameters
Date_ 20121211
Time 0:44
INSTRUM spect
PROBHD 5 mm PABBO BB/
PULPROG zgpg30
TD 65536
SOLVENT ccd13
NS 2
DS 2
SWH 24938.461 Hz
FIDRES 0.186796 Hz
AQ 1.7431488 sec
RG 203
TDW 20.800 usec
DE 6.50 usec
TE 298.15 K
D1 2.00000000 sec
D11 0.03000000 sec
D10 1
----- CHANNEL f1 -----
NUC1 13C
PC1 10.00 usec
PLW1 49.00000000 W
----- CHANNEL f2 -----
NUC2 1H
PC2 14.50 usec
PLW2 10.00000000 W
PLW3 0.25819999 W
F2 - Processing parameters
SI 65536
SF 100.6127615 MHz
WDW EM
SSB 0
LB 1.00 Hz
GB 0
PC 1.40
    
```

<sup>1</sup>H and <sup>13</sup>C NMR of 4-bromo-3,5-dimethyl-1-trityl-1H-pyrazole (S8)

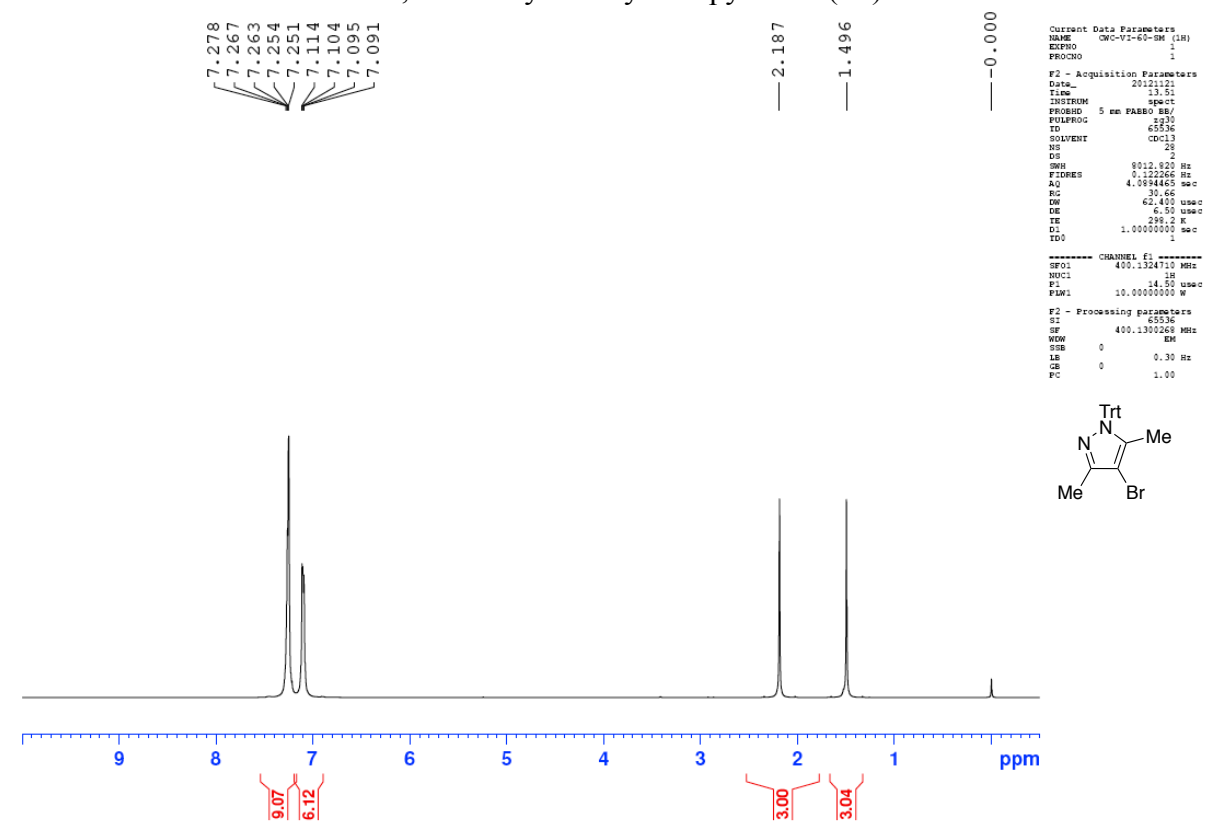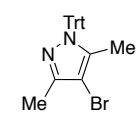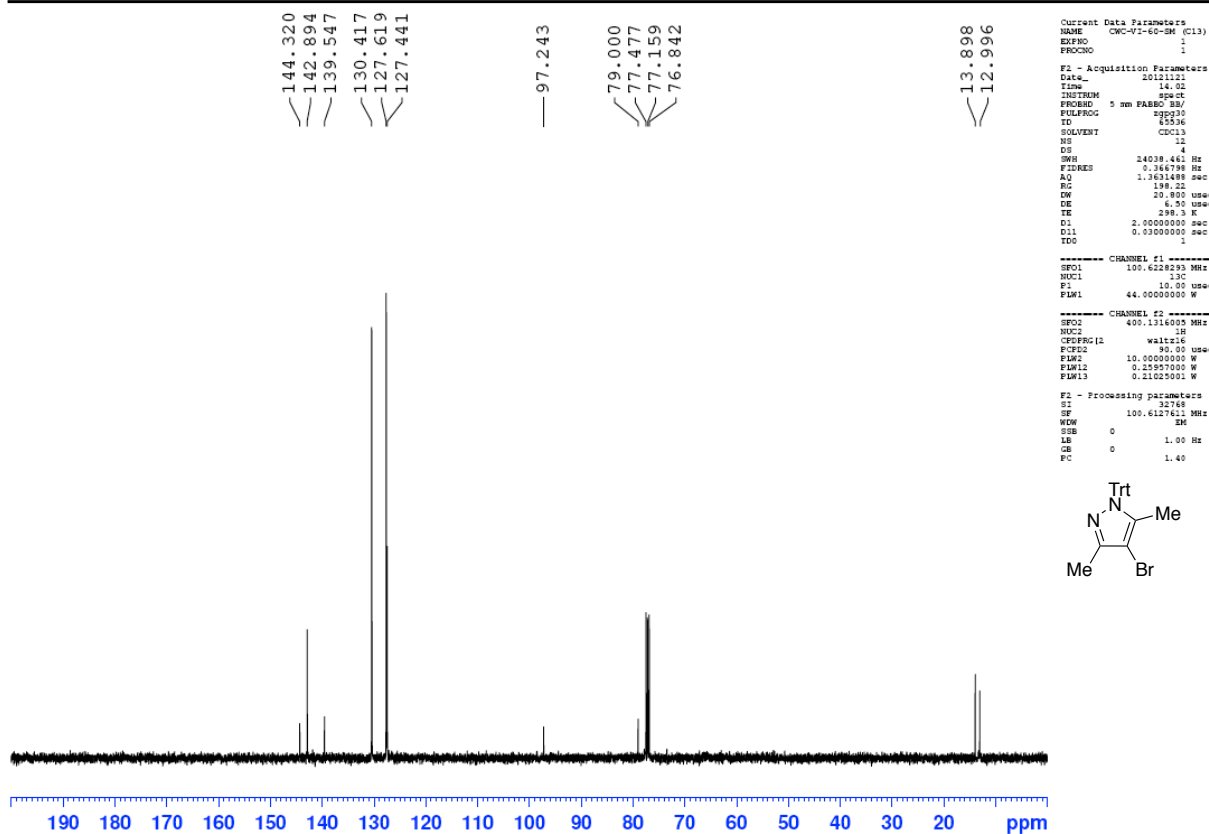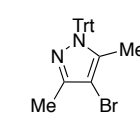

<sup>1</sup>H and <sup>13</sup>C NMR of 5-chloro-8-methoxyquinoline (S9)

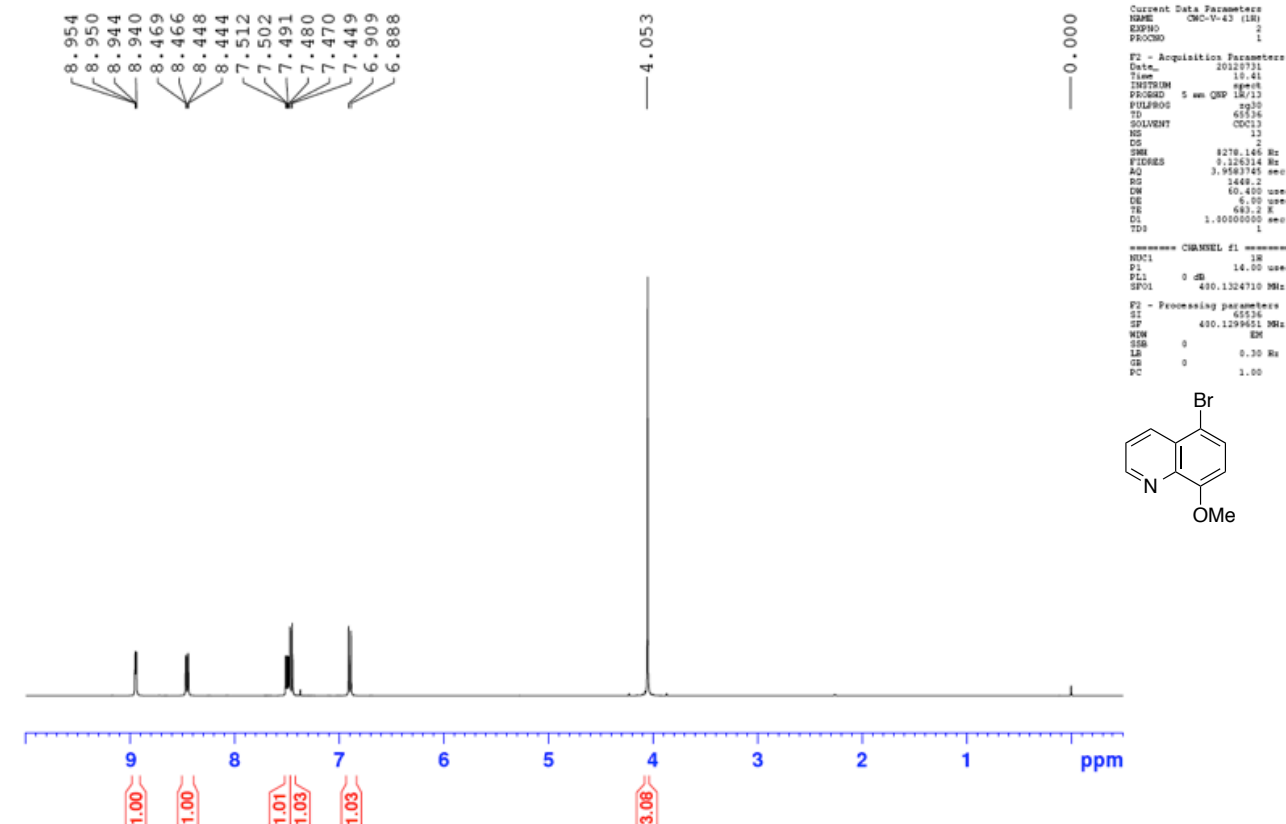

```

Current Data Parameters
NAME CMC-V-43 (18)
EXPNO 2
PROCNO 1

F2 - Acquisition Parameters
Date_ 20120731
Time 10.41
INSTRUM spect
PROBHD 5 mm QNP 1H/13
PULPROG zgpg30
TD 65536
SOLVENT CDCl3
NS 13
DS 2
SWH 8276.146 Hz
FIDRES 0.126314 Hz
AQ 3.9583743 sec
RG 3468.2
DW 10.400 usec
DE 4.00 usec
TE 400.2 K
D1 1.9000000 sec
TD0 1

===== CHANNEL f1 =====
NUC1 13C
P1 14.00 usec
PL1 0 dB
SFO1 400.1324710 MHz

F2 - Processing parameters
SI 65536
SF 400.1299651 MHz
WDW EM
SSB 0
LR 0.30 Hz
GB 0
PC 1.00
    
```

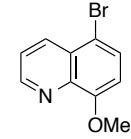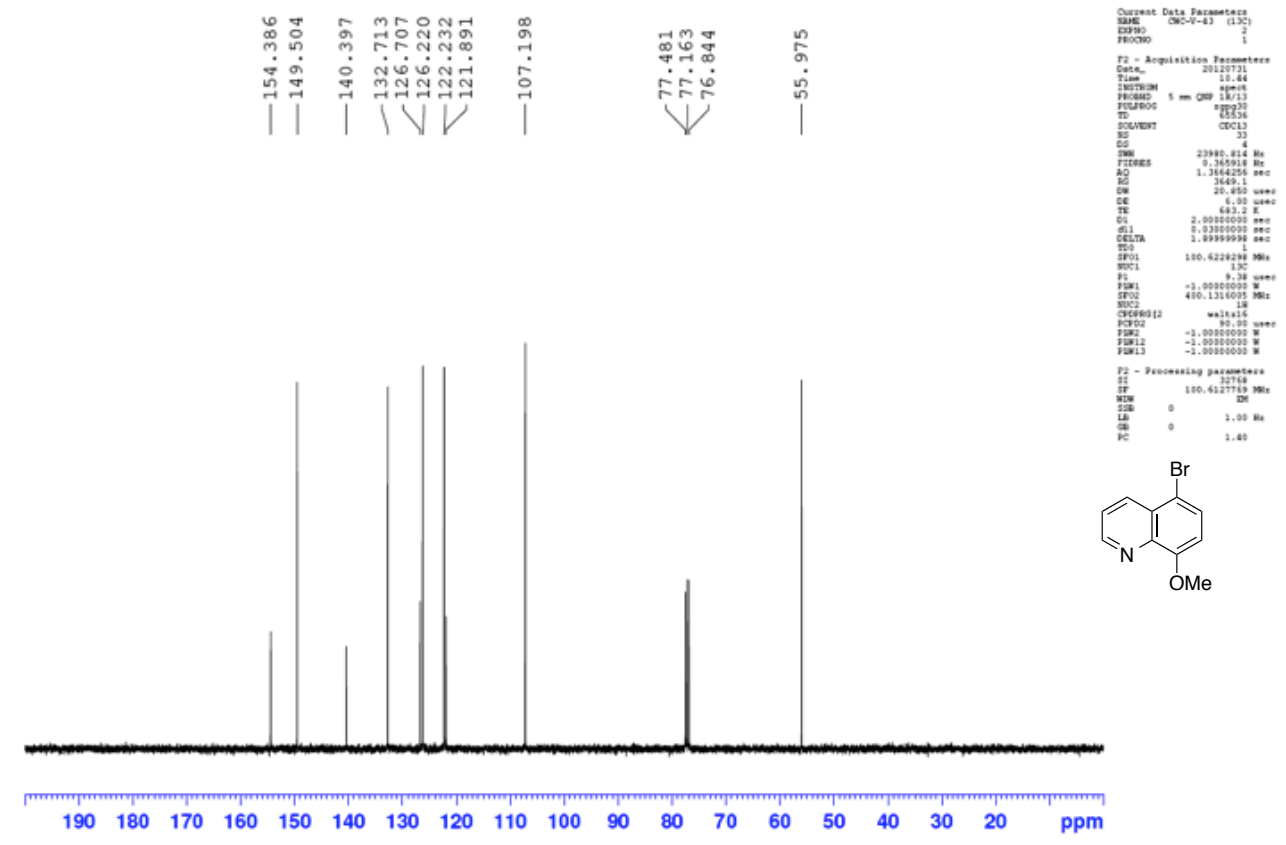

```

Current Data Parameters
NAME CMC-V-43 (132)
EXPNO 2
PROCNO 1

F2 - Acquisition Parameters
Date_ 20120731
Time 10.44
INSTRUM spect
PROBHD 5 mm QNP 1H/13
PULPROG zgpg30
TD 65536
SOLVENT CDCl3
NS 33
DS 4
SWH 23980.814 Hz
FIDRES 0.345018 Hz
AQ 1.3864256 sec
RG 3649.1
DW 20.850 usec
DE 6.00 usec
TE 400.2 K
D1 2.9000000 sec
dS1 0.0300000 sec
DELTA 1.8999999 sec
DS0 1
SFO1 100.6228288 MHz
NUC1 13C
P1 9.30 usec
PL1 -1.0000000 dB
SFO2 400.1316095 MHz
SFO3 100.6228288 MHz
PCWPRG02 waltz16
NUC2 15N
SWH2 90.000000 MHz
PWR2 -1.0000000 W
PWR3 -1.0000000 W
PWR13 -1.0000000 W

F2 - Processing parameters
SI 32768
SF 100.6127719 MHz
WDW EM
SSB 0
LR 1.00 Hz
GB 0
PC 1.00
    
```

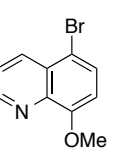



<sup>1</sup>H and <sup>13</sup>C NMR of Dicyclohexyl(2',4',6'-triisopropyl-4-methoxy-3,5,6-trimethyl-[1,1'-biphenyl]-2-yl)phosphine / Dicyclohexyl(2',4',6'-triisopropyl-5-methoxy-3,4,6-trimethyl-[1,1'-biphenyl]-2-yl)phosphine (L6)

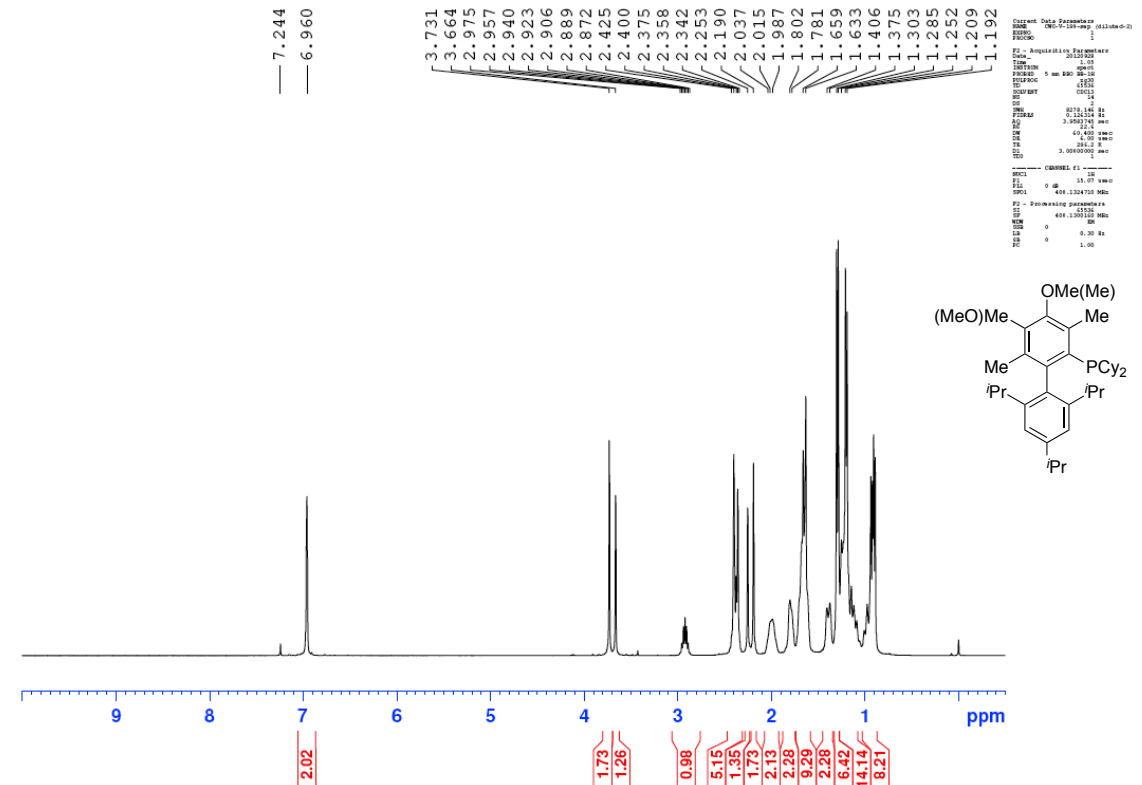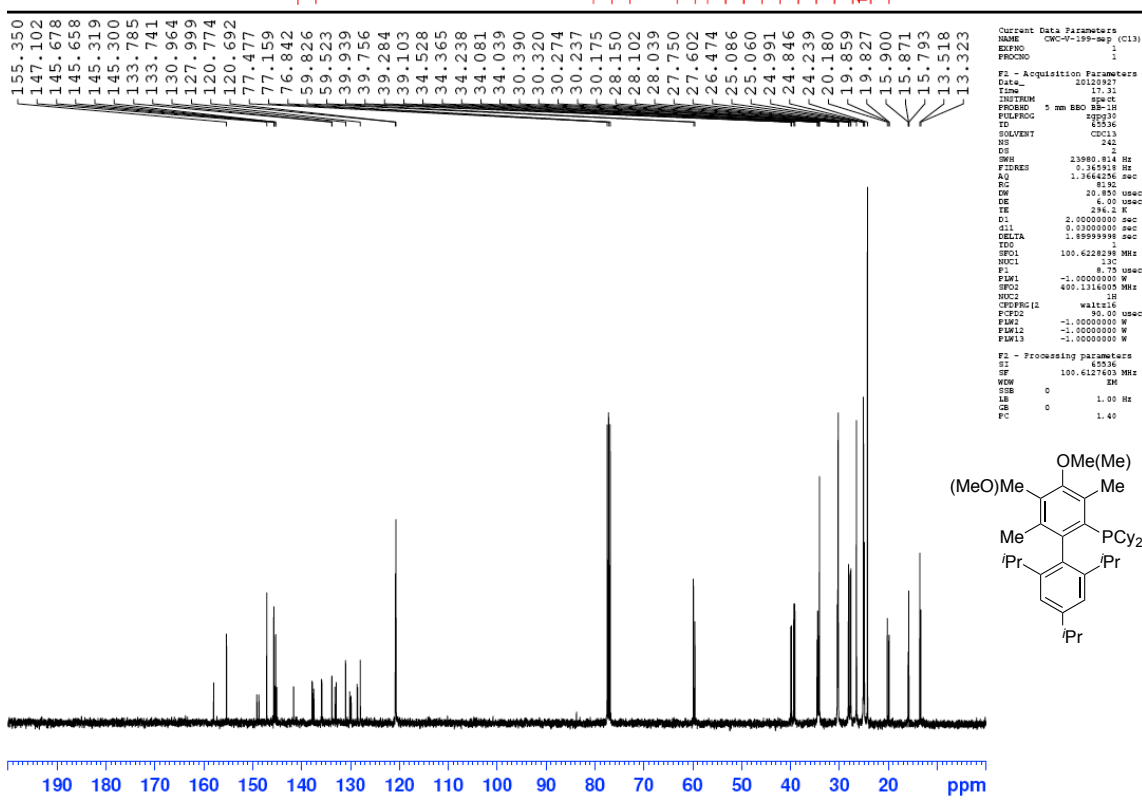

$^{31}\text{P}$  NMR of  
yl)phosphine /  
yl)phosphine (**L6**)

Dicyclohexyl(2',4',6'-triisopropyl-4-methoxy-3,5,6-trimethyl-[1,1'-biphenyl]-2-yl)phosphine /  
Dicyclohexyl(2',4',6'-triisopropyl-5-methoxy-3,4,6-trimethyl-[1,1'-biphenyl]-2-yl)phosphine (**L6**)

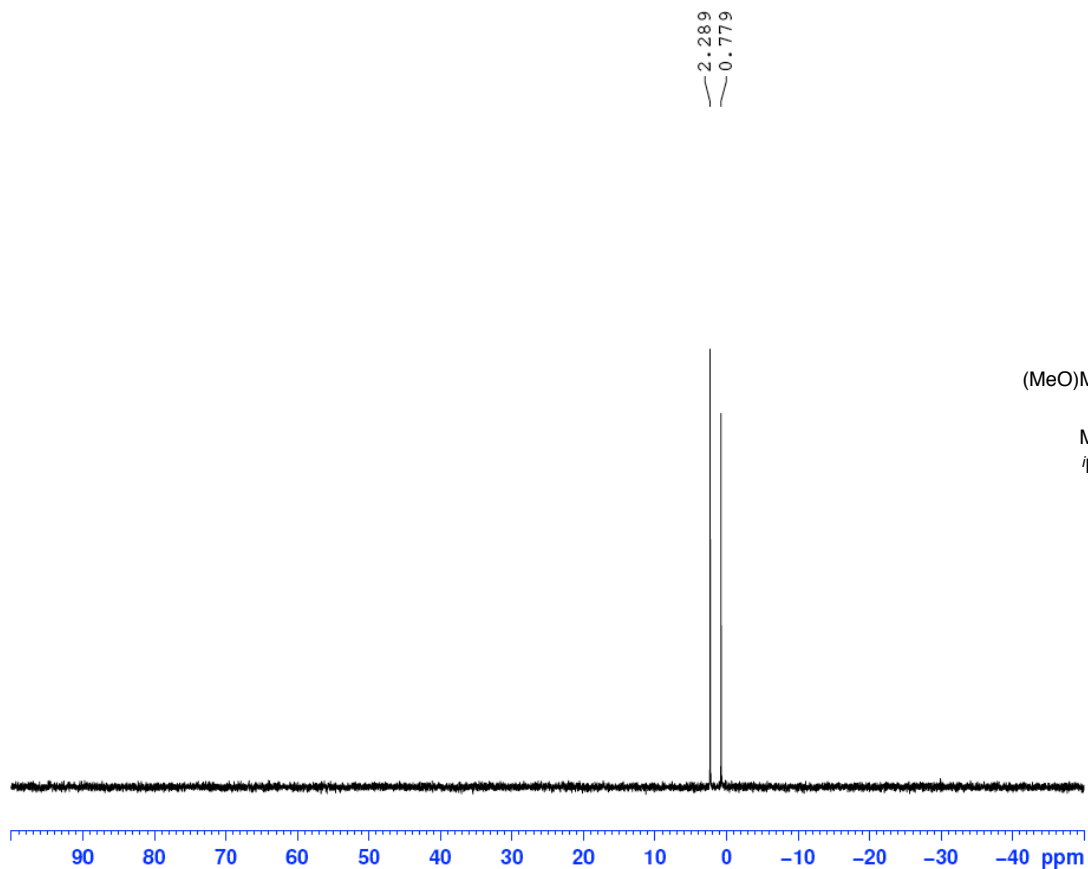

```

=====
Date_   20111123
Time    2.11
INSTRUM spect
PROBHD1 C M0 5mm QNP
PULPROG zgpg30
D0      0.0500
F2      125.13
NUC1    31P
NUC2    1H
SFO      400.146363 MHz
FIDRES  0.1176223 MHz
AQ      0.11118881 sec
RG      655
SI      32768
SF      400.146363 MHz
WDW     EM
SSB     0
LB      1.0000000 MHz
GB      0
PC      1.48
=====
=====
NAME_   C1
PROC_   14.00000000 MHz
P1      13.15
P2      14.00000000 MHz
=====
NAME_   C2
PROC_   100.62610000 MHz
P1      10
P2      100.62610000 MHz
P3      10.00000000 MHz
P4      0.21825000 MHz
P5      0.21825000 MHz
=====
F2 - acquisition parameters
F1      400.146363 MHz
F2      125.13 MHz
SFO      400.146363 MHz
FIDRES  0.1176223 MHz
AQ      0.11118881 sec
RG      655
SI      32768
SF      400.146363 MHz
WDW     EM
SSB     0
LB      1.0000000 MHz
GB      0
PC      1.48
=====

```

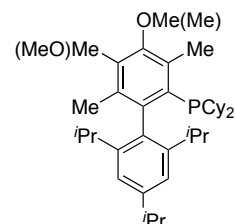

<sup>1</sup>H and <sup>13</sup>C NMR of diphenyl(2',4',6'-triisopropyl-4-methoxy-3,5,6-trimethyl-[1,1'-biphenyl]-2-yl)phosphine and diphenyl(2',4',6'-triisopropyl-5-methoxy-3,4,6-trimethyl-[1,1'-biphenyl]-2-yl)phosphine (L7)

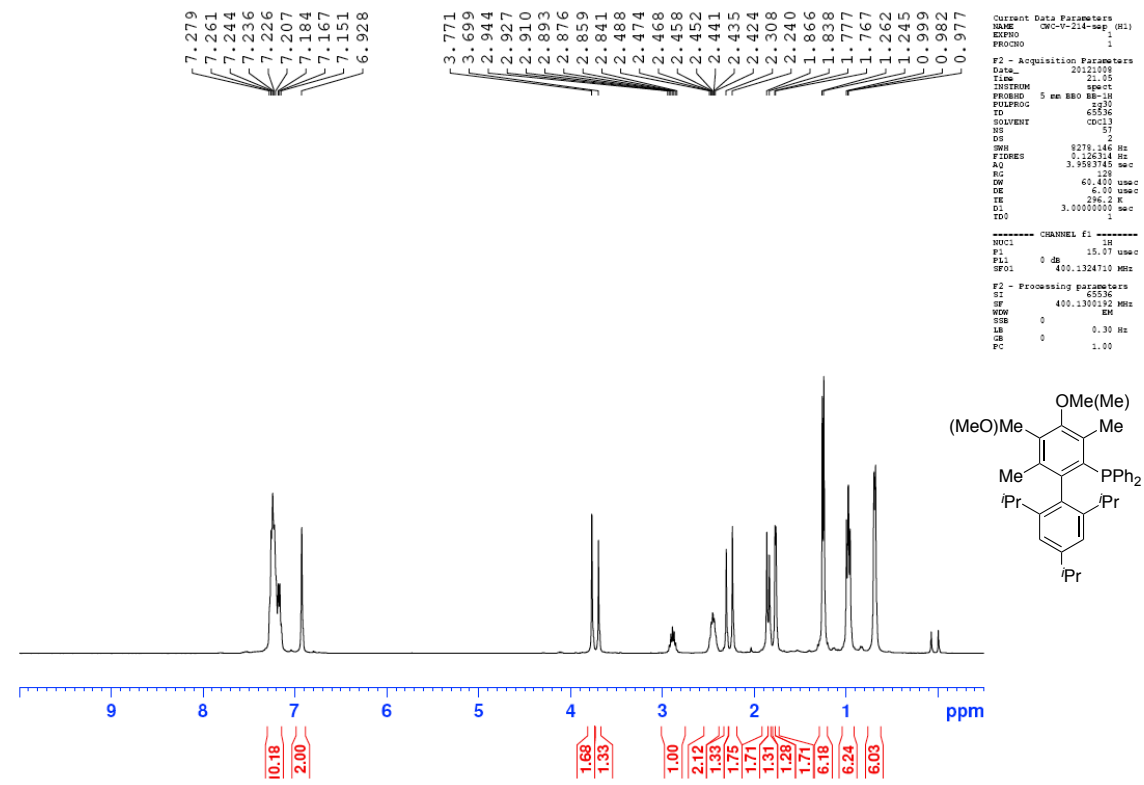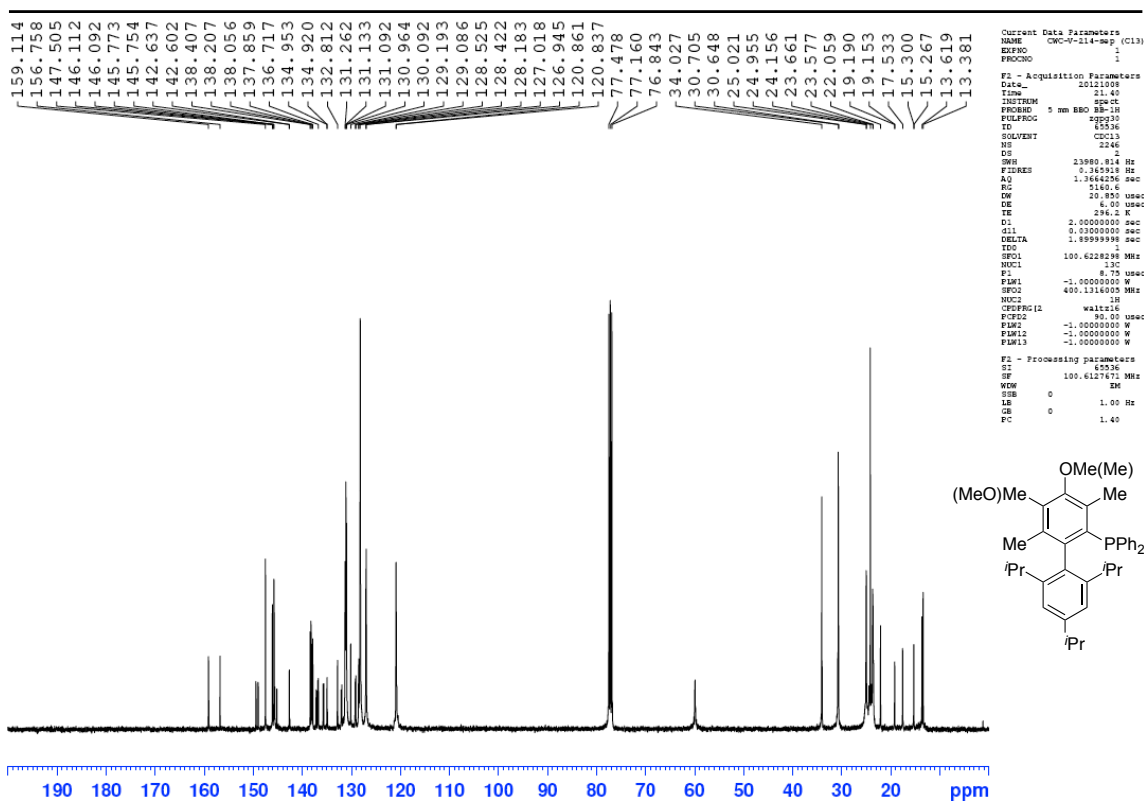

<sup>31</sup>P NMR of diphenyl(2',4',6'-triisopropyl-4-methoxy-3,5,6-trimethyl-[1,1'-biphenyl]-2-yl)phosphine and diphenyl(2',4',6'-triisopropyl-5-methoxy-3,4,6-trimethyl-[1,1'-biphenyl]-2-yl)phosphine (L7)

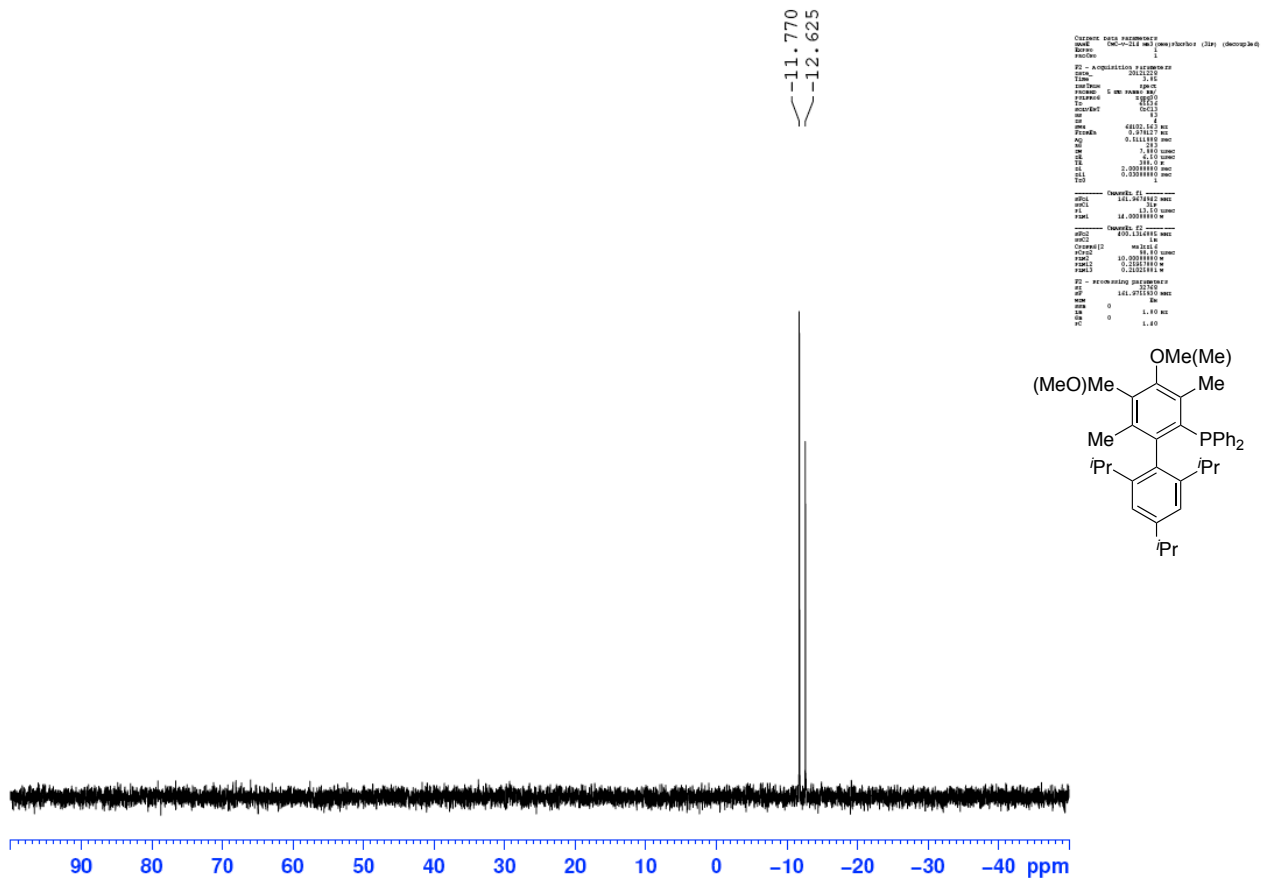

<sup>1</sup>H and <sup>13</sup>C NMR of Diisopropyl(2',4',6'-triisopropyl-4-methoxy-3,5,6-trimethyl-[1,1'-biphenyl]-2-yl)phosphine / Diisopropyl(2',4',6'-triisopropyl-5-methoxy-3,4,6-trimethyl-[1,1'-biphenyl]-2-yl)phosphine (L8)

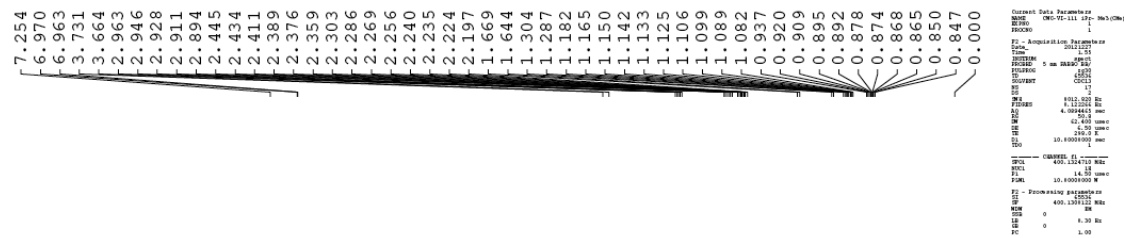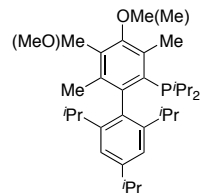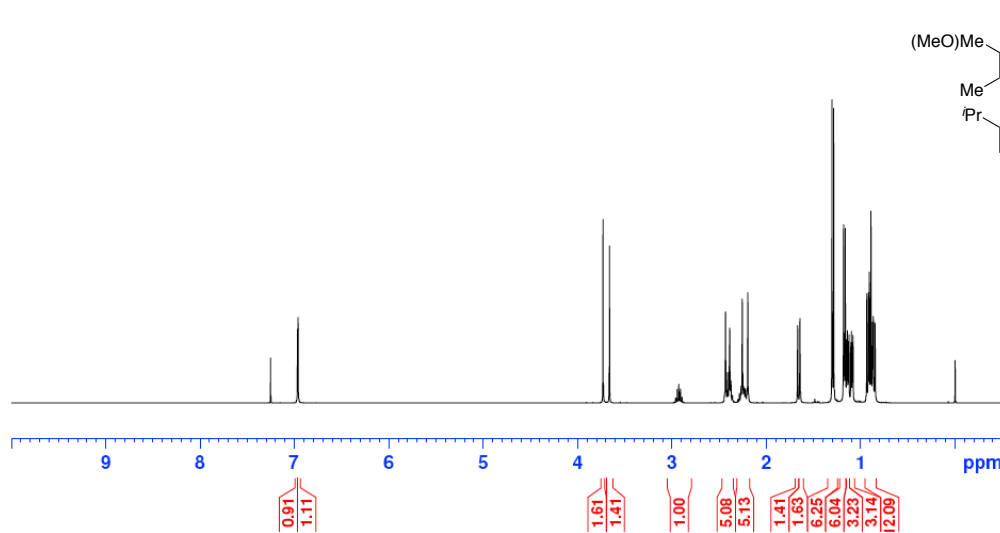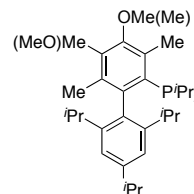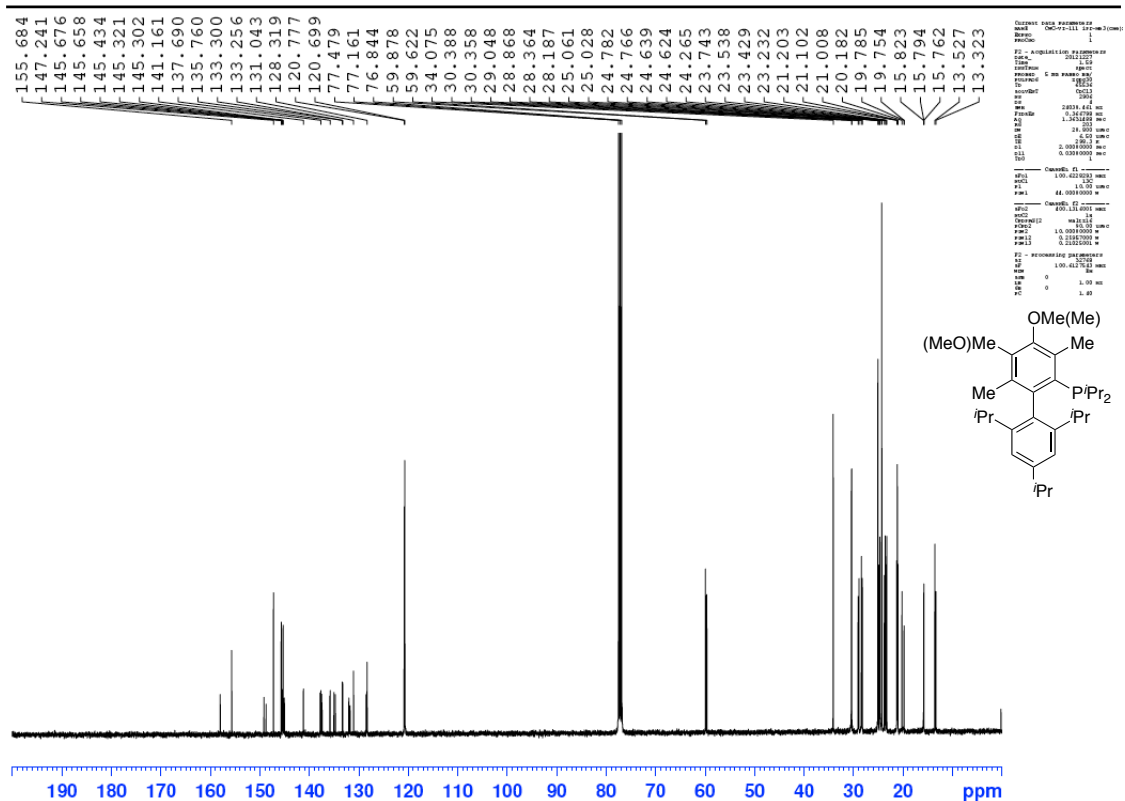

$^{31}\text{P}$  NMR of Diisopropyl(2',4',6'-triisopropyl-4-methoxy-3,5,6-trimethyl-[1,1'-biphenyl]-2-yl)phosphine / Diisopropyl(2',4',6'-triisopropyl-5-methoxy-3,4,6-trimethyl-[1,1'-biphenyl]-2-yl)phosphine (**L8**)

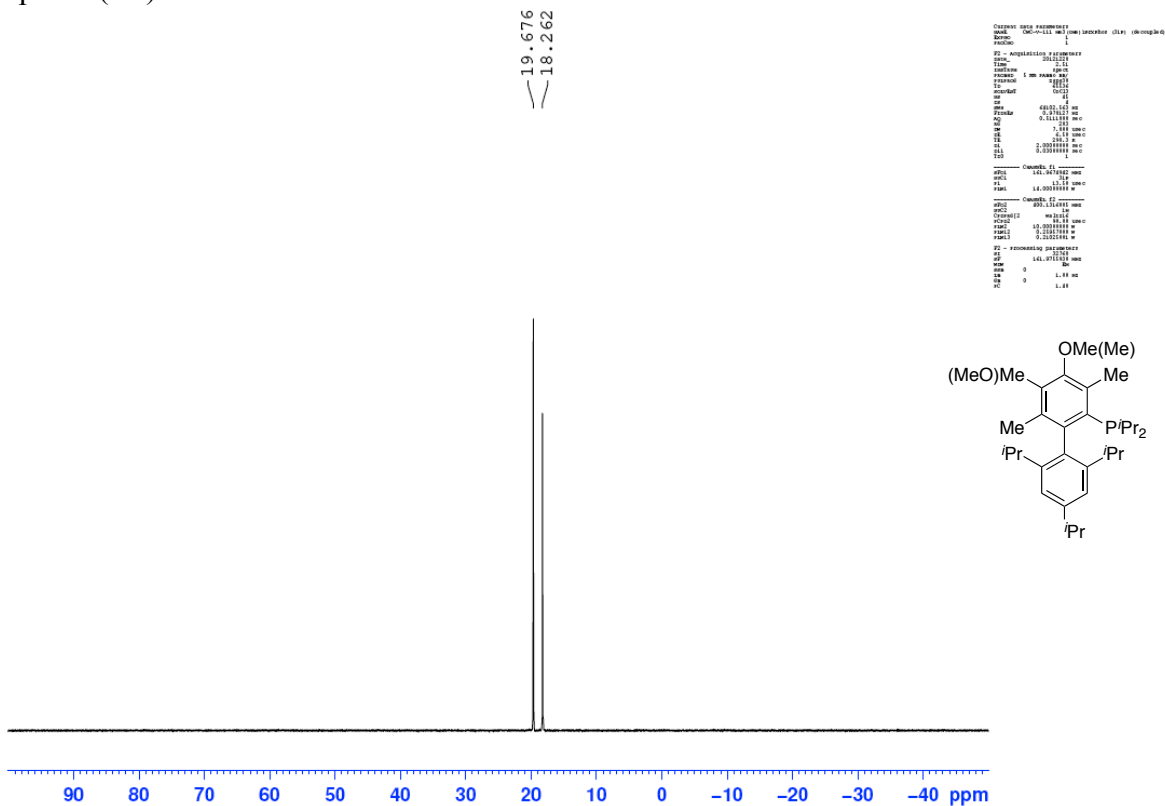

$^1\text{H}$  and  $^{13}\text{C}$  NMR of Dicyclohexyl(2',4',6'-tri-*tert*-butyl-4-methoxy-3,5,6-trimethyl-[1,1'-biphenyl]-2-yl)phosphine and Dicyclohexyl(2',4',6'-tri-*tert*-butyl-5-methoxy-3,4,6-trimethyl-[1,1'-biphenyl]-2-yl)phosphine (**L9**)

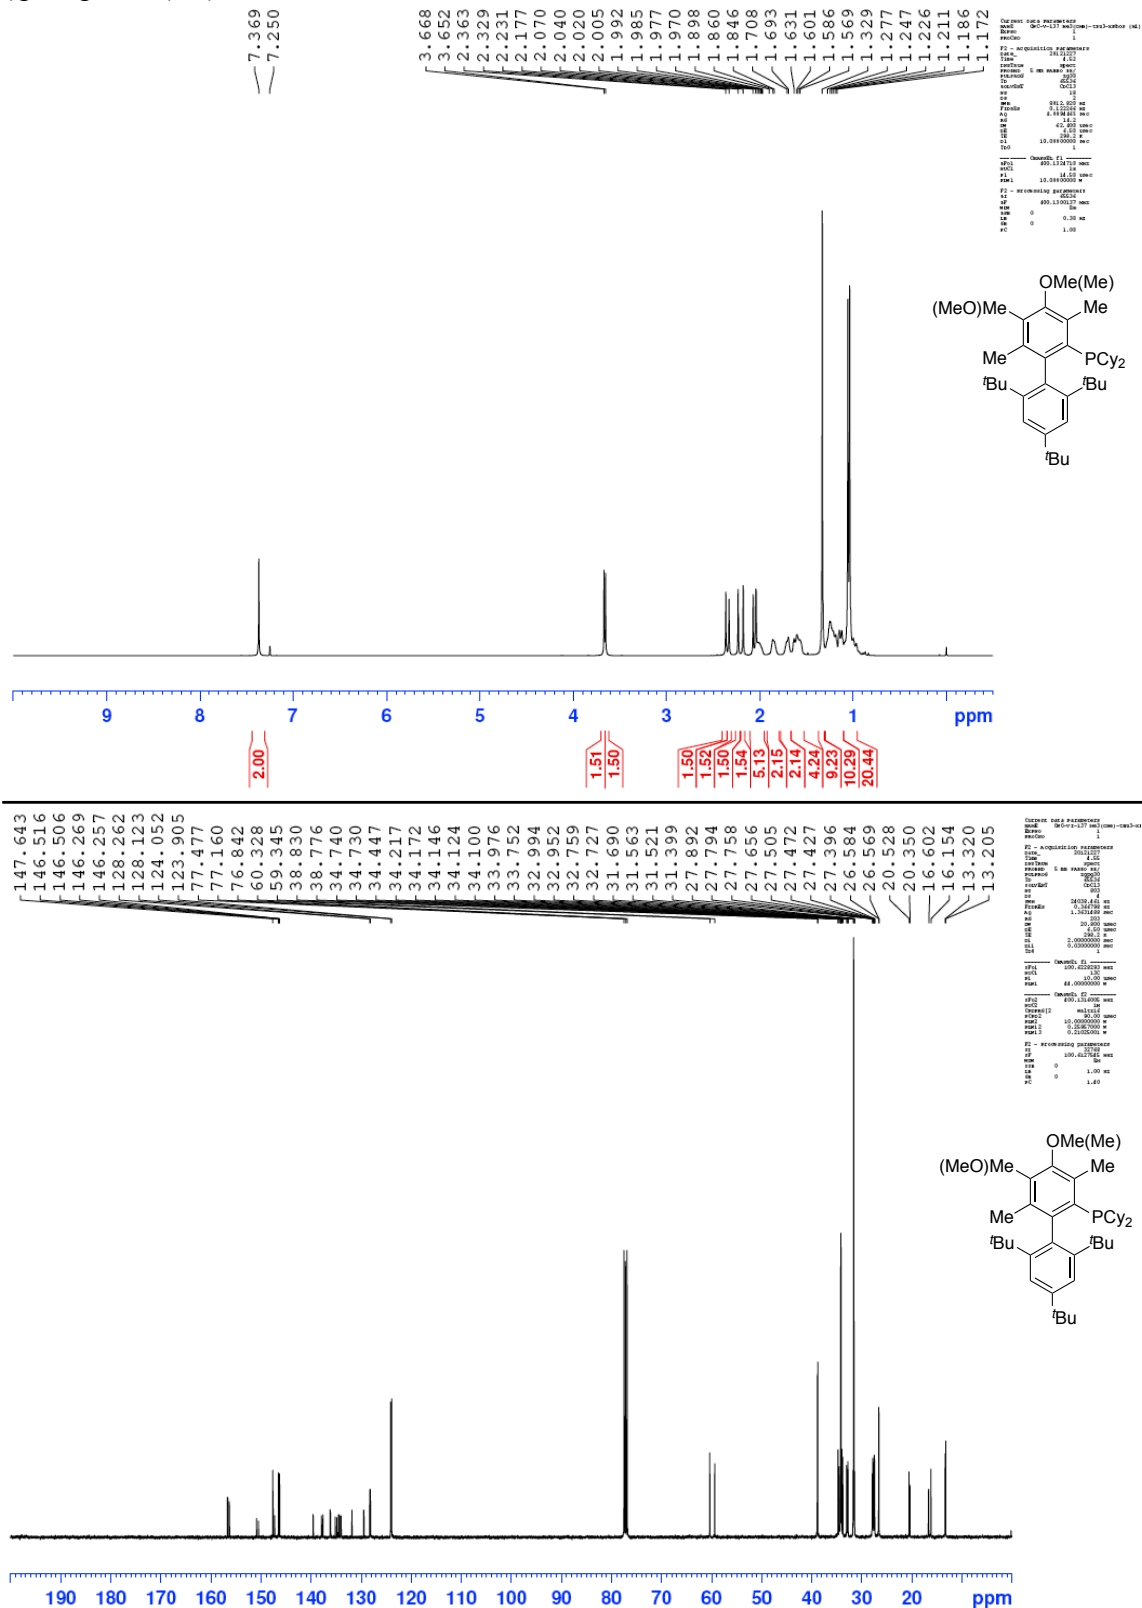

$^{31}\text{P}$  NMR of  
yl)phosphine and  
yl)phosphine (**L9**)

Dicyclohexyl(2',4',6'-tri-*tert*-butyl-4-methoxy-3,5,6-trimethyl-[1,1'-biphenyl]-2-yl)phosphine and  
Dicyclohexyl(2',4',6'-tri-*tert*-butyl-5-methoxy-3,4,6-trimethyl-[1,1'-biphenyl]-2-yl)phosphine (**L9**)

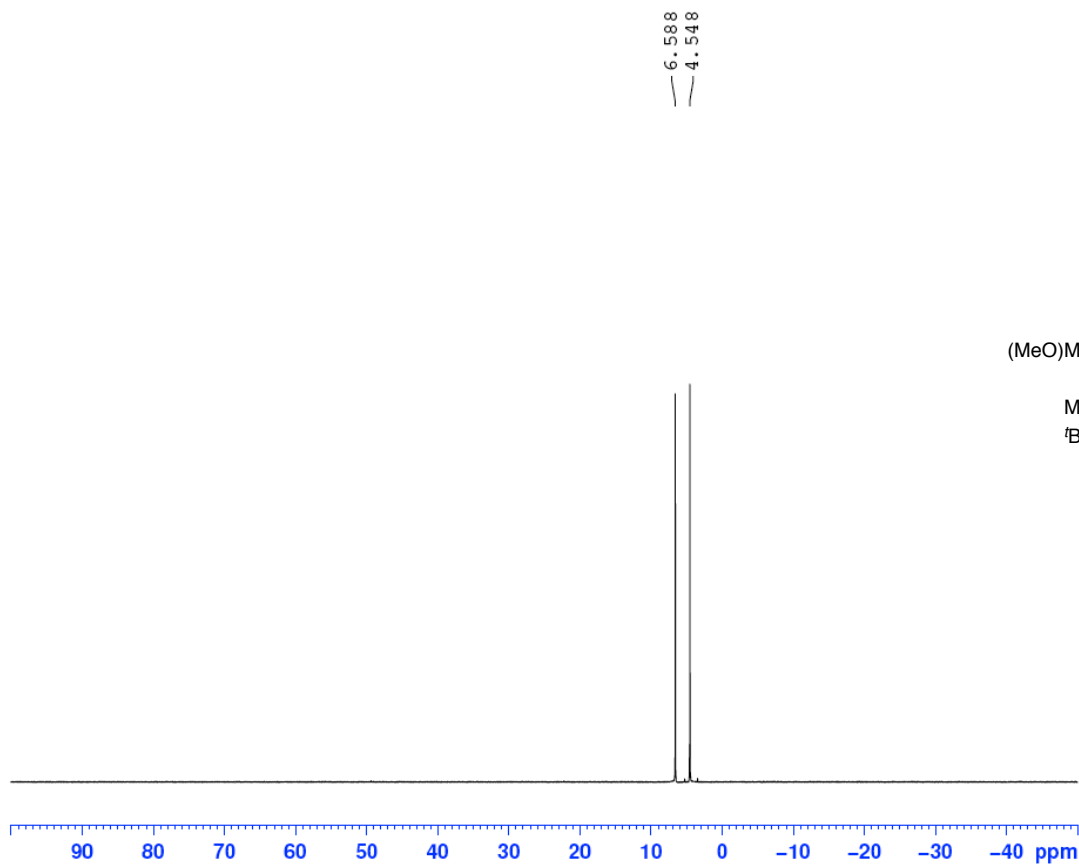

```

===== Data Parameters =====
NAME: 2-(2-(1,1'-biphenyl)-2-yl)-1,1'-biphenyl (19)
EXPNO: 1
PROCNO: 1
PROCPS: 1
SOLVENT: CDCl3
AQ: 0.10000000
RG: 32
SI: 65536
SF: 125.760363
WDW: EM
SSB: 0
LB: 0.30000000
GB: 0
PC: 1.00000000
SC: 0
RC: 0
DS: 3.00000000
LL: 0.00000000
RG1: 32
RG2: 32
RG3: 32
RG4: 32
RG5: 32
RG6: 32
RG7: 32
RG8: 32
RG9: 32
RG10: 32
RG11: 32
RG12: 32
RG13: 32
RG14: 32
RG15: 32
RG16: 32
RG17: 32
RG18: 32
RG19: 32
RG20: 32
RG21: 32
RG22: 32
RG23: 32
RG24: 32
RG25: 32
RG26: 32
RG27: 32
RG28: 32
RG29: 32
RG30: 32
RG31: 32
RG32: 32
===== Processing parameters =====
SI: 65536
SF: 125.760363
WDW: EM
SSB: 0
LB: 0.30000000
GB: 0
PC: 1.00000000
SC: 0
RC: 0
DS: 3.00000000
LL: 0.00000000
RG1: 32
RG2: 32
RG3: 32
RG4: 32
RG5: 32
RG6: 32
RG7: 32
RG8: 32
RG9: 32
RG10: 32
RG11: 32
RG12: 32
RG13: 32
RG14: 32
RG15: 32
RG16: 32
RG17: 32
RG18: 32
RG19: 32
RG20: 32
RG21: 32
RG22: 32
RG23: 32
RG24: 32
RG25: 32
RG26: 32
RG27: 32
RG28: 32
RG29: 32
RG30: 32
RG31: 32
RG32: 32
===== Channel f1 parameters =====
NUC1: 31P
P1: 181.000000
PC1: 1.000000
===== Channel f2 parameters =====
NUC2: 13C
P2: 101.325121
PC2: 1.000000
===== Acquisition parameters =====
SI: 65536
SF: 125.760363
WDW: EM
SSB: 0
LB: 0.30000000
GB: 0
PC: 1.00000000
SC: 0
RC: 0
DS: 3.00000000
LL: 0.00000000
RG1: 32
RG2: 32
RG3: 32
RG4: 32
RG5: 32
RG6: 32
RG7: 32
RG8: 32
RG9: 32
RG10: 32
RG11: 32
RG12: 32
RG13: 32
RG14: 32
RG15: 32
RG16: 32
RG17: 32
RG18: 32
RG19: 32
RG20: 32
RG21: 32
RG22: 32
RG23: 32
RG24: 32
RG25: 32
RG26: 32
RG27: 32
RG28: 32
RG29: 32
RG30: 32
RG31: 32
RG32: 32

```

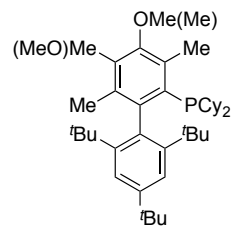



# <sup>1</sup>H and <sup>13</sup>C NMR of Aminobiphenyl Palladacycle Precatalyst (3a)

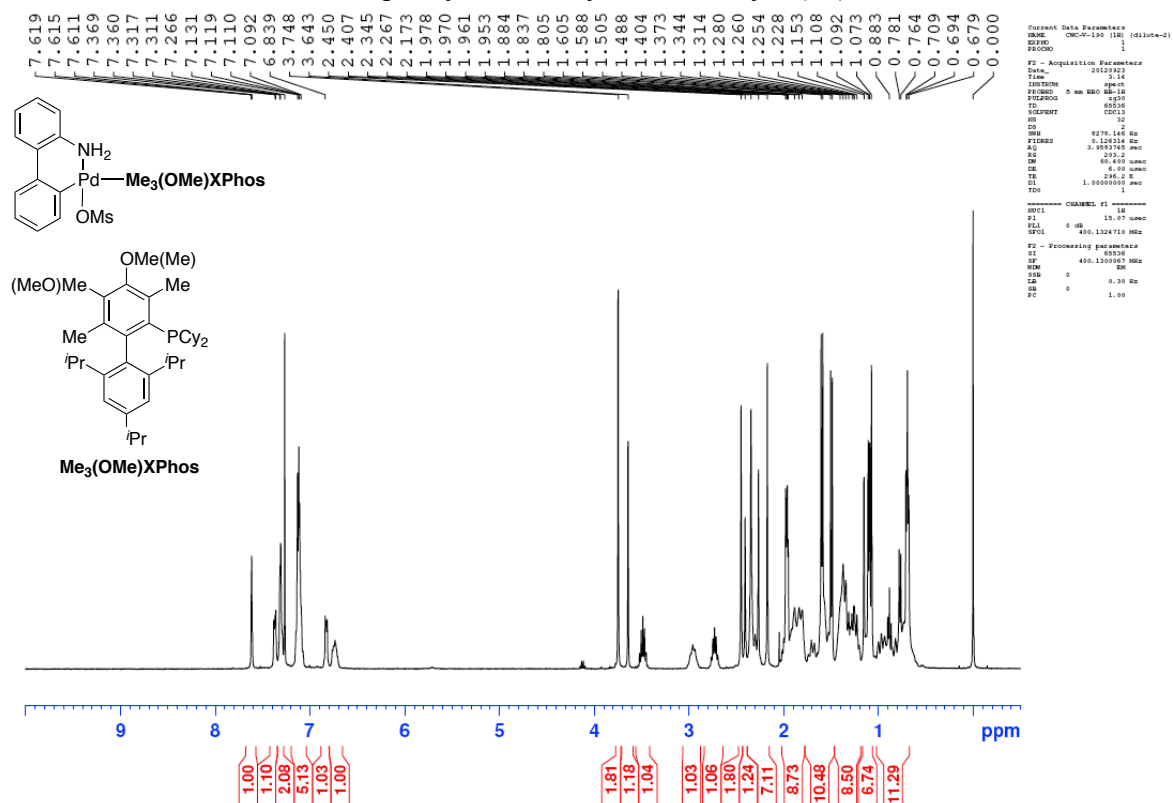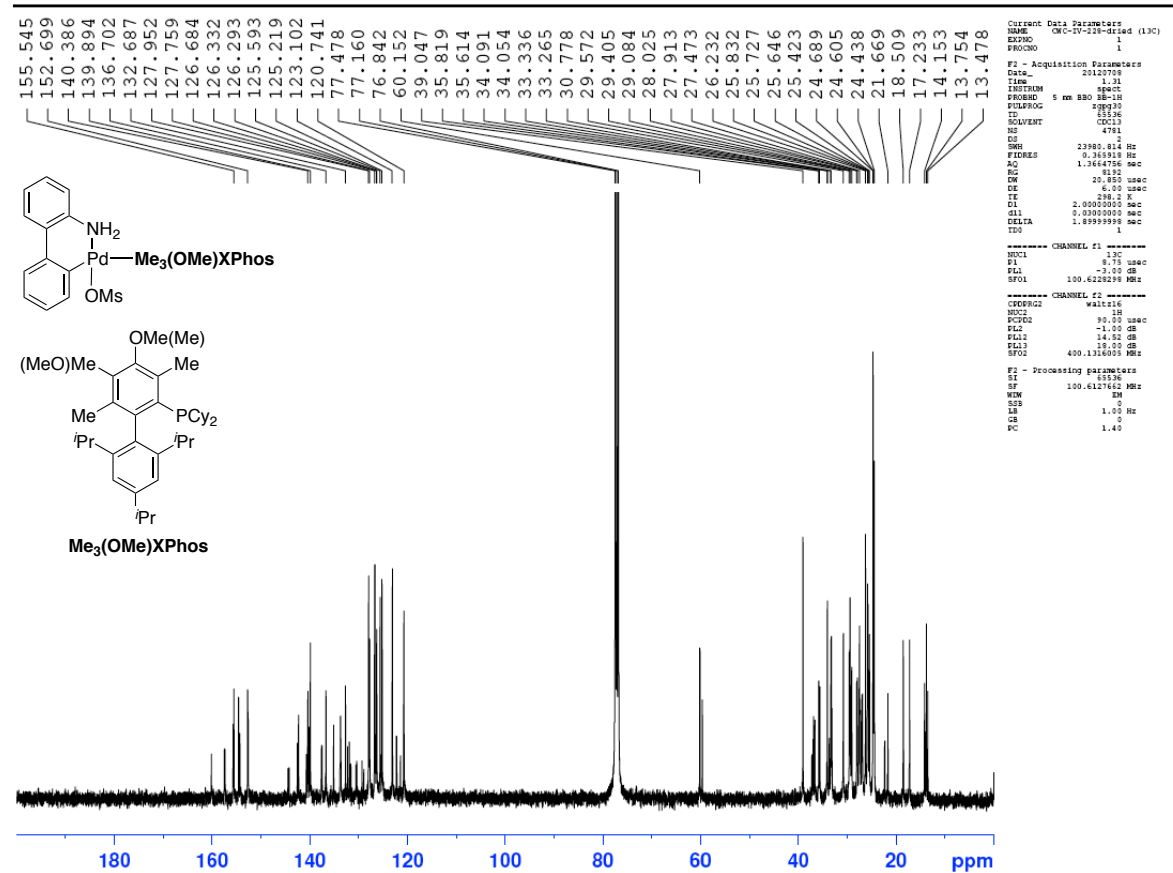



# <sup>1</sup>H and <sup>13</sup>C NMR of Aminobiphenyl Palladacycle Precatalyst (**3b**)

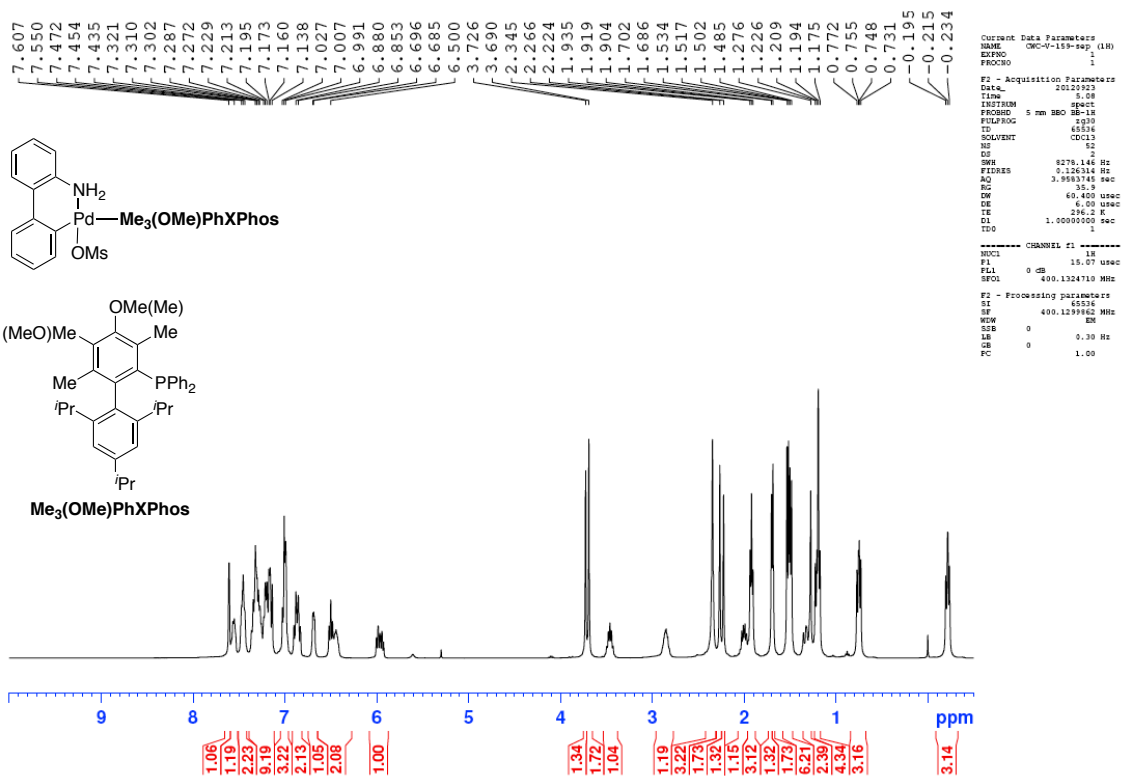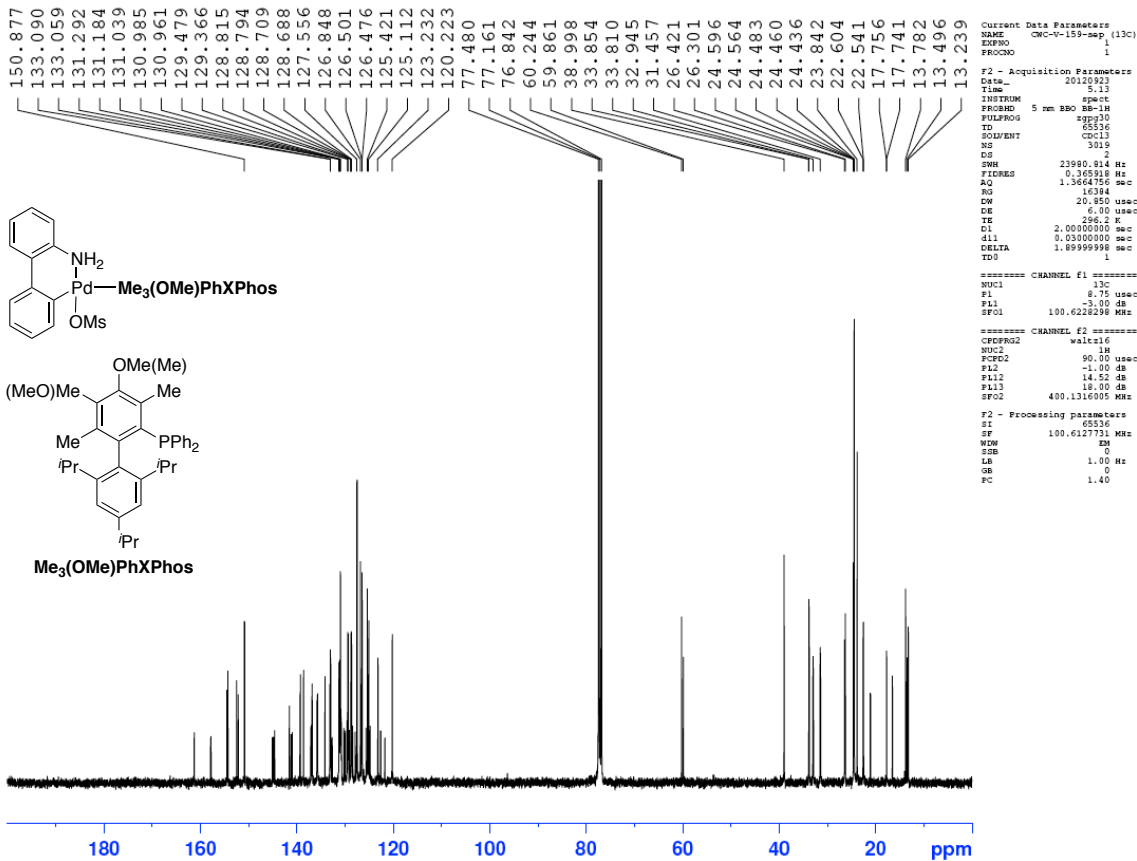

# <sup>31</sup>P NMR of Aminobiphenyl Palladacycle Precatalyst (**3b**)

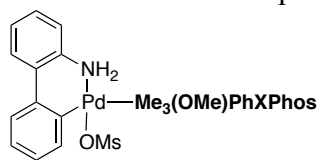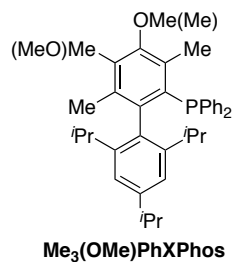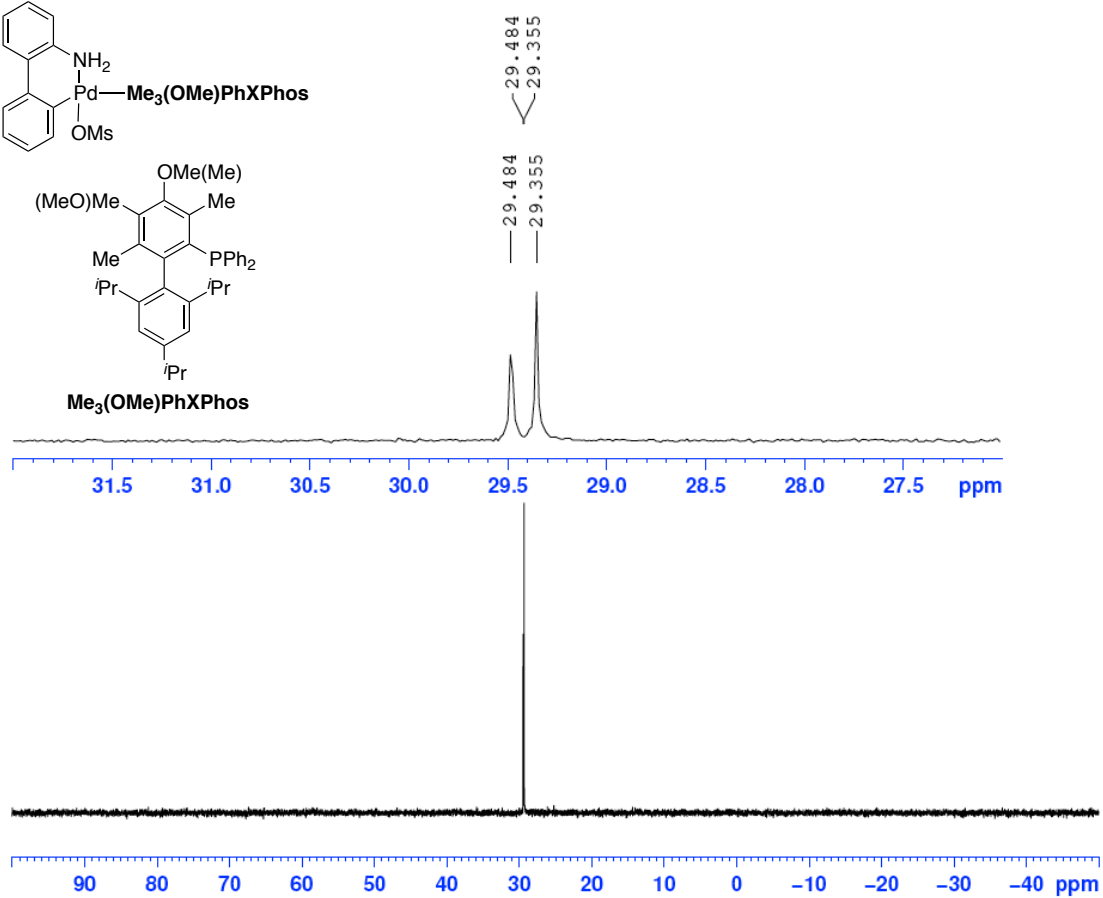

| Parameter | Value          |
|-----------|----------------|
| NAME      | 1              |
| PROC      | 1              |
| DATE      | 20111111       |
| TIME      | 10:00:00       |
| INSTRUM   | CPDQ           |
| PROBHD    | 5mm QNP 1H/31P |
| PULPROG   | zgpg30         |
| TD        | 65536          |
| SI        | 16             |
| SF        | 125.760000 MHz |
| F2        | 125.760000 MHz |
| NUC1      | 31P            |
| NUC2      | 1H             |
| PC        | 1.50           |
| PD        | 0.00           |
| PL1       | 0.00           |
| PL2       | 0.00           |
| PL3       | 0.00           |
| PL4       | 0.00           |
| PL5       | 0.00           |
| PL6       | 0.00           |
| PL7       | 0.00           |
| PL8       | 0.00           |
| PL9       | 0.00           |
| PL10      | 0.00           |
| PL11      | 0.00           |
| PL12      | 0.00           |
| PL13      | 0.00           |
| PL14      | 0.00           |
| PL15      | 0.00           |
| PL16      | 0.00           |
| PL17      | 0.00           |
| PL18      | 0.00           |
| PL19      | 0.00           |
| PL20      | 0.00           |
| PL21      | 0.00           |
| PL22      | 0.00           |
| PL23      | 0.00           |
| PL24      | 0.00           |
| PL25      | 0.00           |
| PL26      | 0.00           |
| PL27      | 0.00           |
| PL28      | 0.00           |
| PL29      | 0.00           |
| PL30      | 0.00           |
| PL31      | 0.00           |
| PL32      | 0.00           |
| PL33      | 0.00           |
| PL34      | 0.00           |
| PL35      | 0.00           |
| PL36      | 0.00           |
| PL37      | 0.00           |
| PL38      | 0.00           |
| PL39      | 0.00           |
| PL40      | 0.00           |
| PL41      | 0.00           |
| PL42      | 0.00           |
| PL43      | 0.00           |
| PL44      | 0.00           |
| PL45      | 0.00           |
| PL46      | 0.00           |
| PL47      | 0.00           |
| PL48      | 0.00           |
| PL49      | 0.00           |
| PL50      | 0.00           |
| PL51      | 0.00           |
| PL52      | 0.00           |
| PL53      | 0.00           |
| PL54      | 0.00           |
| PL55      | 0.00           |
| PL56      | 0.00           |
| PL57      | 0.00           |
| PL58      | 0.00           |
| PL59      | 0.00           |
| PL60      | 0.00           |
| PL61      | 0.00           |
| PL62      | 0.00           |
| PL63      | 0.00           |
| PL64      | 0.00           |
| PL65      | 0.00           |
| PL66      | 0.00           |
| PL67      | 0.00           |
| PL68      | 0.00           |
| PL69      | 0.00           |
| PL70      | 0.00           |
| PL71      | 0.00           |
| PL72      | 0.00           |
| PL73      | 0.00           |
| PL74      | 0.00           |
| PL75      | 0.00           |
| PL76      | 0.00           |
| PL77      | 0.00           |
| PL78      | 0.00           |
| PL79      | 0.00           |
| PL80      | 0.00           |
| PL81      | 0.00           |
| PL82      | 0.00           |
| PL83      | 0.00           |
| PL84      | 0.00           |
| PL85      | 0.00           |
| PL86      | 0.00           |
| PL87      | 0.00           |
| PL88      | 0.00           |
| PL89      | 0.00           |
| PL90      | 0.00           |
| PL91      | 0.00           |
| PL92      | 0.00           |
| PL93      | 0.00           |
| PL94      | 0.00           |
| PL95      | 0.00           |
| PL96      | 0.00           |
| PL97      | 0.00           |
| PL98      | 0.00           |
| PL99      | 0.00           |
| PL100     | 0.00           |

# <sup>1</sup>H and <sup>13</sup>C NMR of 4-Morpholinoaniline (4a)

6.944  
6.922  
6.842  
6.818  
6.783  
6.762  
6.636  
6.614

3.824  
3.813  
3.459  
3.059  
3.047  
3.034  
2.990  
2.979

0.000

```
Current Data Parameters
NAME      CWC-V-174A-sep (1H)
EXPNO    1
PROCNO   1
F2 - Acquisition Parameters
Date_    20120921
Time     12.04
INSTRUM  spect
PROBHD   5 mm BBO BB-1H
PULPROG  zgpg30
TD        65536
SOLVENT  CDCl3
NS        2
DS        2
SWH       8278.146 Hz
FIDRES   0.126314 Hz
AQ        3.9592740 sec
RG        28.5
DW        60.400 usec
DE        6.00 usec
TE        297.2 K
D1        1.00000000 sec
TDO       1
----- CHANNEL f1 -----
NUC1      1H
P1        15.07 usec
PL1       0 dB
SFO1      400.1324710 MHz
F2 - Processing Parameters
SI        65536
SF        400.1300151 MHz
WDW       EM
SSB       0
LB        0.30 Hz
GB        0
PC        1.00
```

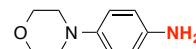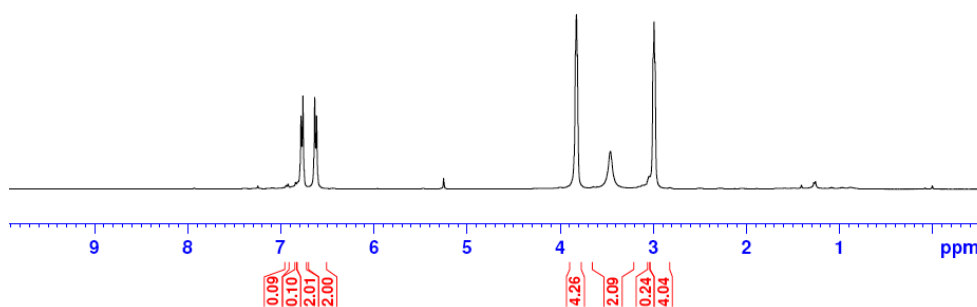

144.262  
140.389  
118.107  
116.113  
77.481  
77.162  
76.844  
67.005  
51.040

```
Current Data Parameters
NAME      CWC-V-176B-sep (13C)
EXPNO    1
PROCNO   1
F2 - Acquisition Parameters
Date_    20120921
Time     12.17
INSTRUM  spect
PROBHD   5 mm BBO BB-1H
PULPROG  zgpg30
TD        65536
SOLVENT  CDCl3
NS        117
DS        2
SWH       23980.814 Hz
FIDRES   0.365918 Hz
AQ        1.3664756 sec
RG        81.92
DW        20.850 usec
DE        6.00 usec
TE        297.2 K
D1        2.00000000 sec
d11       0.03000000 sec
SOLVENT  CDCl3
TDO       1
----- CHANNEL f1 -----
NUC1      13C
P1        8.75 usec
PL1       -3.00 dB
SFO1      100.6222228 MHz
----- CHANNEL f2 -----
CPDPRG2  waltz16
NUC2      1H
P2P2     90.00 usec
PL2       -1.00 dB
PL12     14.52 dB
PL13     18.00 dB
SFO2      400.1316000 MHz
F2 - Processing Parameters
SI        65536
SF        100.617788 MHz
WDW       EM
SSB       0
LB        1.00 Hz
GB        0
PC        1.40
```

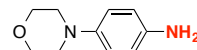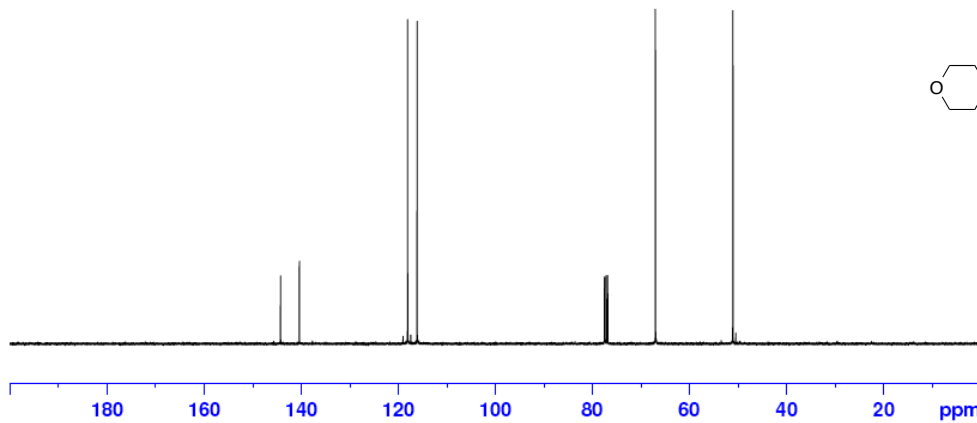

<sup>1</sup>H and <sup>13</sup>C NMR of 4-(Methylthio)aniline (**4b**)

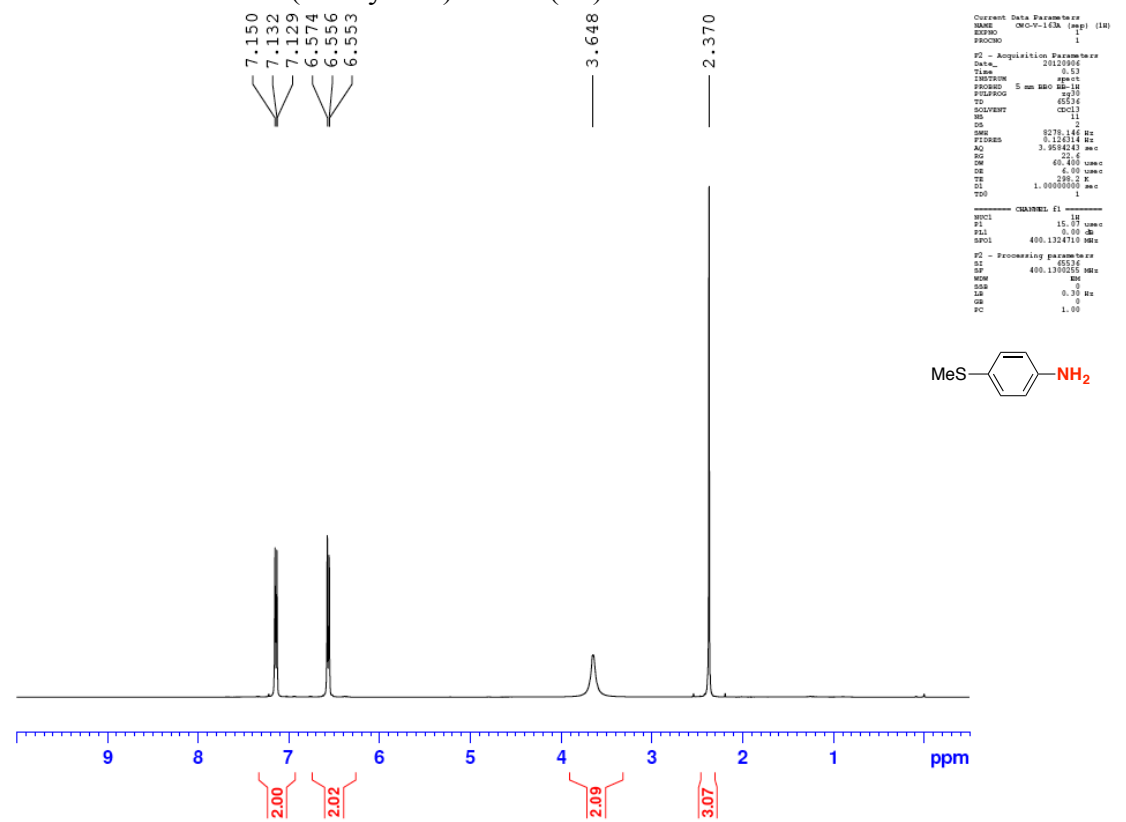

```

Current Data Parameters
NAME      06-C-13A (mp) (1H)
EXPNO    1
PROCNO   1
F2 - Acquisition Parameters
Date_    20120901
Time     0.53
INSTRUM  spect
PROBHD   5 mm BBO BB-1H
PULPROG  zgpg30
TD       65536
SOLVENT  CDCl3
NS       11
DS       2
SWH       9278.146 Hz
FIDRES   0.126314 Hz
AQ       3.9584243 sec
RG       384
SQ       49.400 usec
DE       6.00 usec
TE       300.2 K
SI       1.00000000 sec
TD0      1
----- CHANNEL f1 -----
NUC1      1H
P1        16.00 usec
PL1       0.00 dB
SFO1      400.134710 MHz
F2 - Processing parameters
SI       65536
SF       400.134710 MHz
WDW      EM
SSB      0
LB       0.30 Hz
GB       0
PC       1.00
  
```

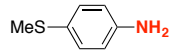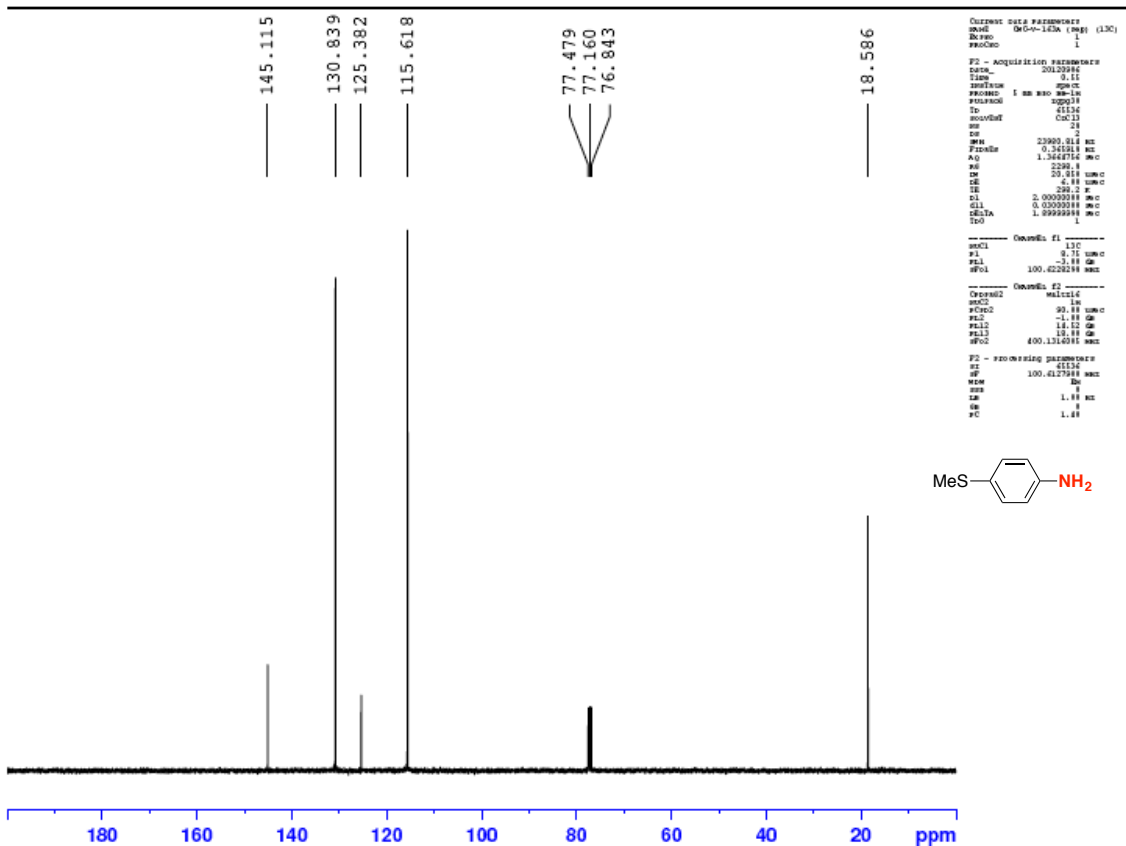

```

Current Data Parameters
NAME      06-C-13A (mp) (13C)
EXPNO    1
PROCNO   1
F2 - Acquisition Parameters
Date_    20120901
Time     2.11
INSTRUM  spect
PROBHD   5 mm BBO BB-1H
PULPROG  zgpg30
TD       65536
SOLVENT  CDCl3
NS       11
DS       2
SWH       23900.000 Hz
FIDRES   0.361911 Hz
AQ       1.3468700 sec
RG       384
SQ       2289.1
DE       20.813 usec
TE       300.2 K
SI       2.00000000 sec
TD0      1
----- CHANNEL f1 -----
NUC1      13C
P1        16.00 usec
PL1       -3.00 dB
SFO1      100.6222214 MHz
----- CHANNEL f2 -----
NAME      Multis14
NUC2      13C
P2        90.00 usec
PL2       -1.00 dB
SFO2      100.6222214 MHz
F2 - Processing parameters
SI       65536
SF       100.6222214 MHz
WDW      EM
SSB      0
LB       1.00 Hz
GB       0
PC       1.00
  
```

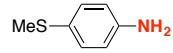

<sup>1</sup>H and <sup>13</sup>C NMR of 4-(*tert*-Butyl)aniline (**4c**)

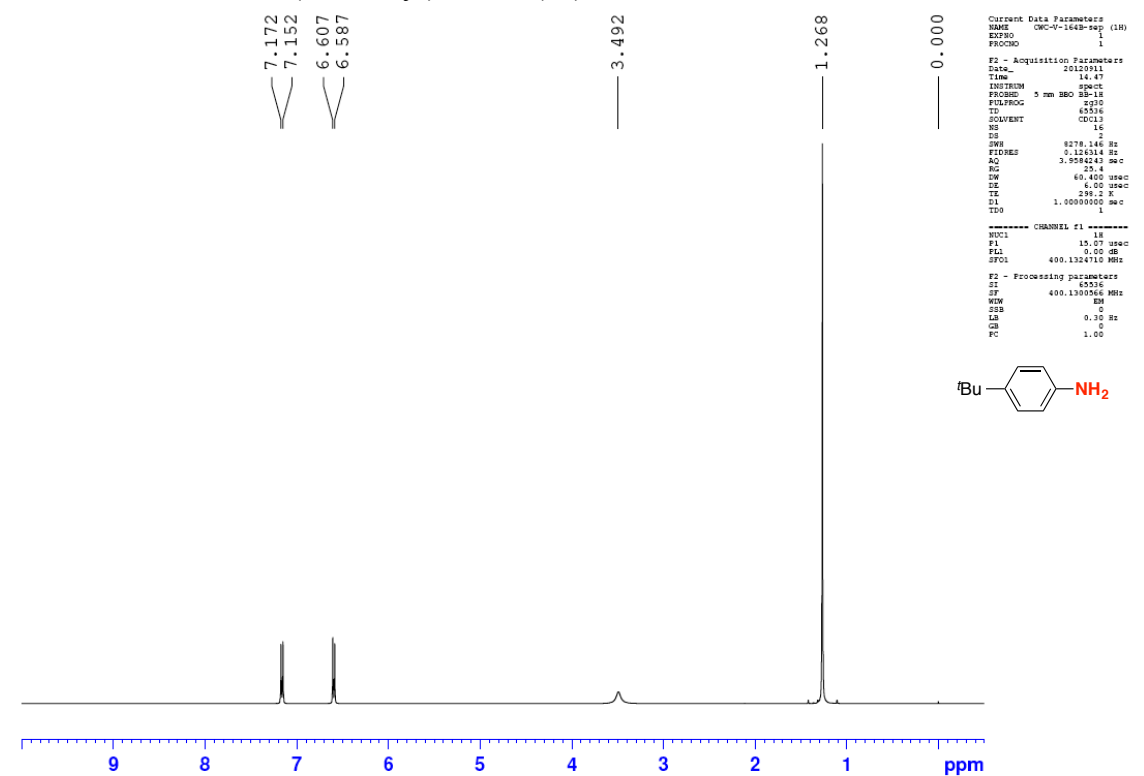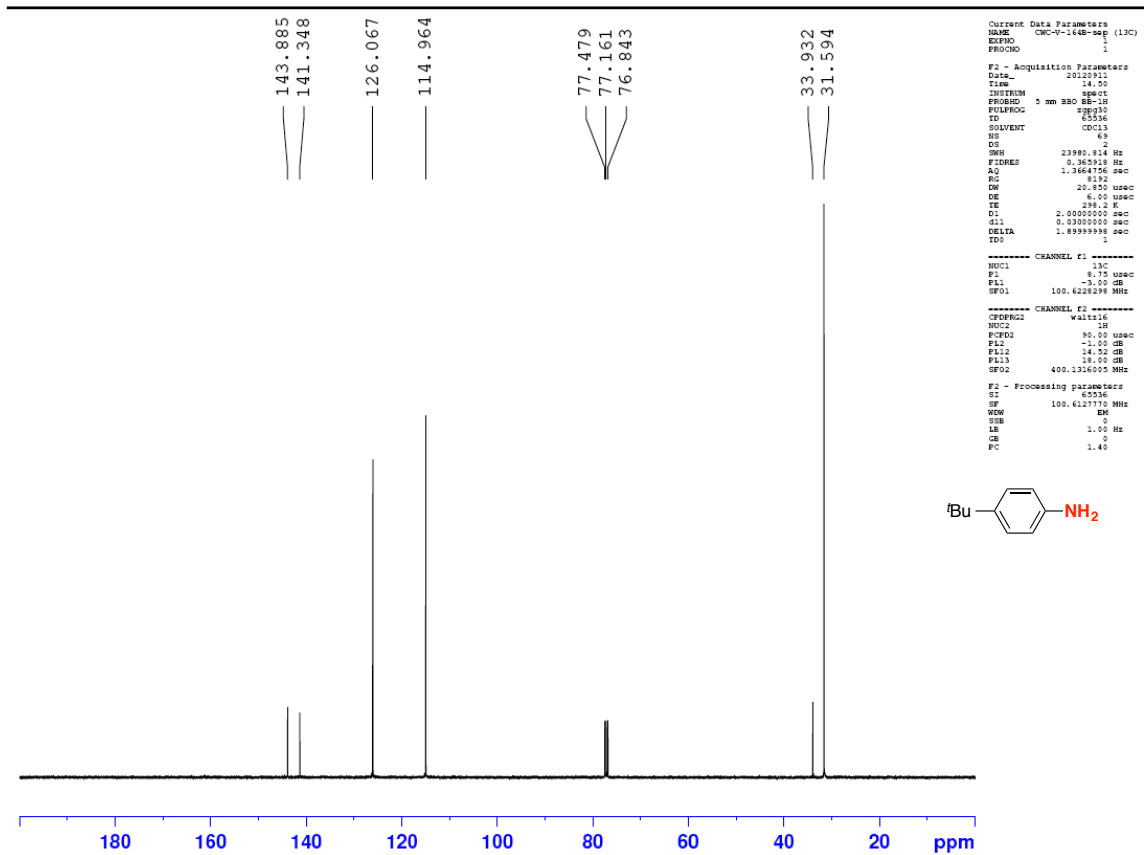

<sup>1</sup>H and <sup>13</sup>C NMR of 4-(Trimethylsilyl)aniline (**4d**)

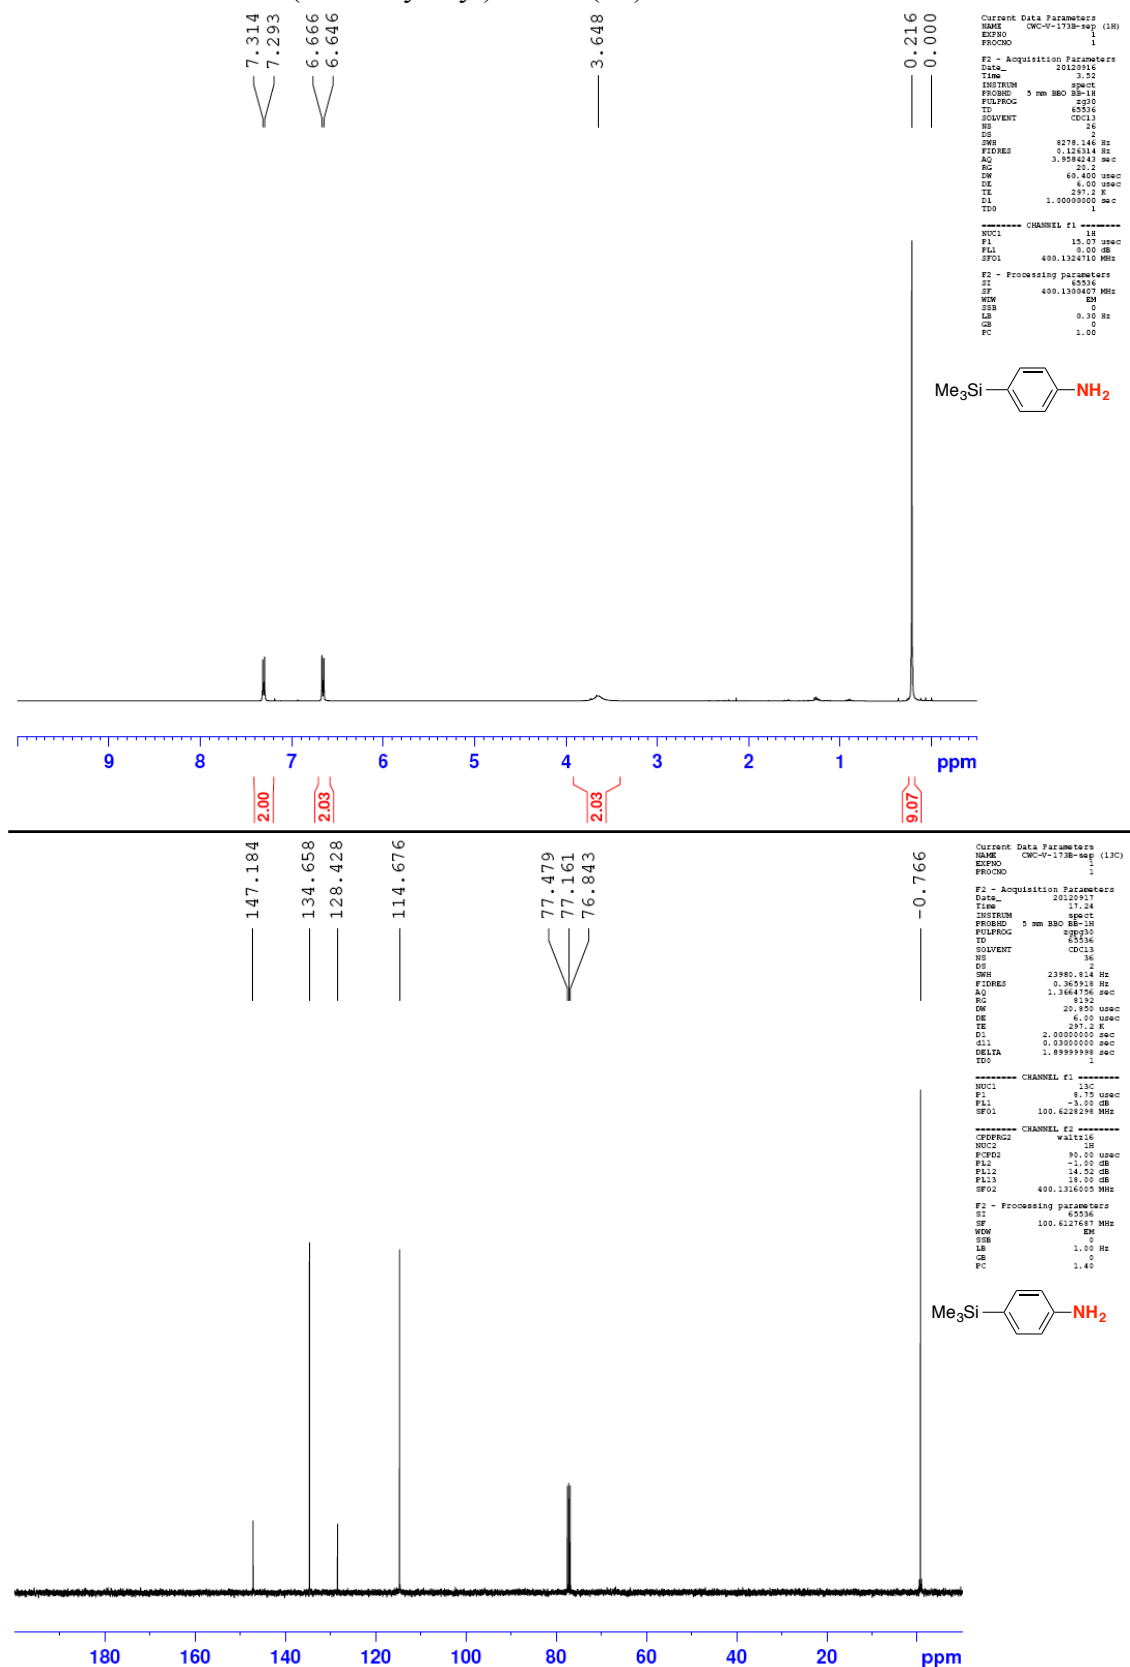



<sup>1</sup>H and <sup>13</sup>C NMR of 4-Aminobenzonitrile (4e)

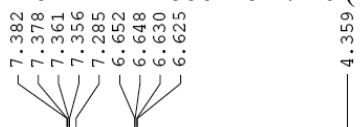

```

Current Data Parameters
NAME      CWC-V-168A-sep (1H)
EXPNO    1
PROCNO   1

F2 - Acquisition Parameters
Date_    20120911
Time     23.41
INSTRUM  spect
PROBHD   5 mm BBO BB-1H
PULPROG  zgpg30
TD       65536
SOLVENT  CDCl3
NS       17
DS       2
SFO1     400.132410 MHz
FIDRES   0.126314 Hz
AQ       3.358243 sec
RG       35.9
DF       60.400 usec
DE       6.00 usec
TE       298.2 K
D1       1.0000000 sec
TD0      1

----- CHANNEL f1 -----
NUC1     1H
P1       13.07 usec
PL1      0.00 dB
SFO1     400.132410 MHz

F2 - Processing parameters
SI       65536
SF       400.130001 MHz
WDW      EM
SSB      0
LB       0.30 Hz
GB       0
PC       1.00
    
```

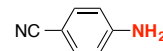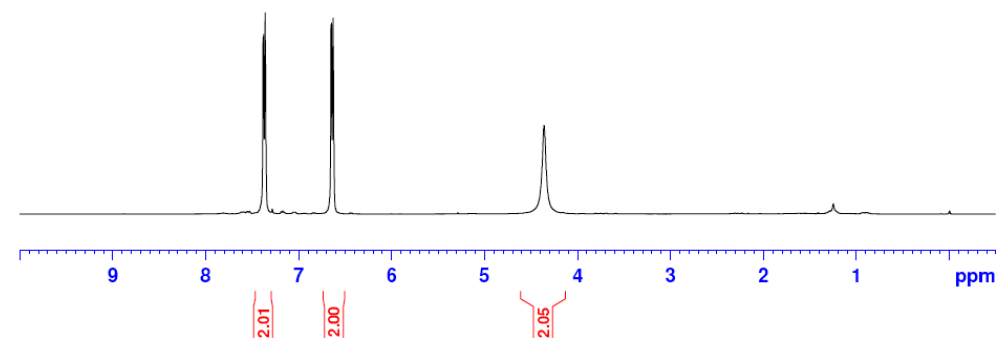

```

Current Data Parameters
NAME      CWC-V-168A-sep (13C)
EXPNO    1
PROCNO   1

F2 - Acquisition Parameters
Date_    20120911
Time     23.46
INSTRUM  spect
PROBHD   5 mm BBO BB-1H
PULPROG  zgpg30
TD       65536
SOLVENT  CDCl3
NS       58
DS       2
SFO1     100.6281298 MHz
FIDRES   0.365058 Hz
AQ       1.3664756 sec
RG       35.9
DF       20.850 usec
DE       6.00 usec
TE       298.2 K
D1       2.0000000 sec
D11      0.0300000 sec
DELTA    1.8999999 sec
TD0      1

----- CHANNEL f1 -----
NUC1     13C
P1       8.75 usec
PL1      -3.00 dB
SFO1     100.6281298 MHz

----- CHANNEL f2 -----
CPDPRG2  waltz16
NUC2     1H
PCPD2    90.00 usec
PL2      1.00 dB
PL12     14.00 dB
PL13     14.00 dB
PL14     14.00 dB
SFO2     400.1336000 MHz

F2 - Processing parameters
SI       65536
SF       100.627739 MHz
WDW      EM
SSB      0
LB       1.00 Hz
GB       0
PC       1.40
    
```

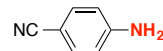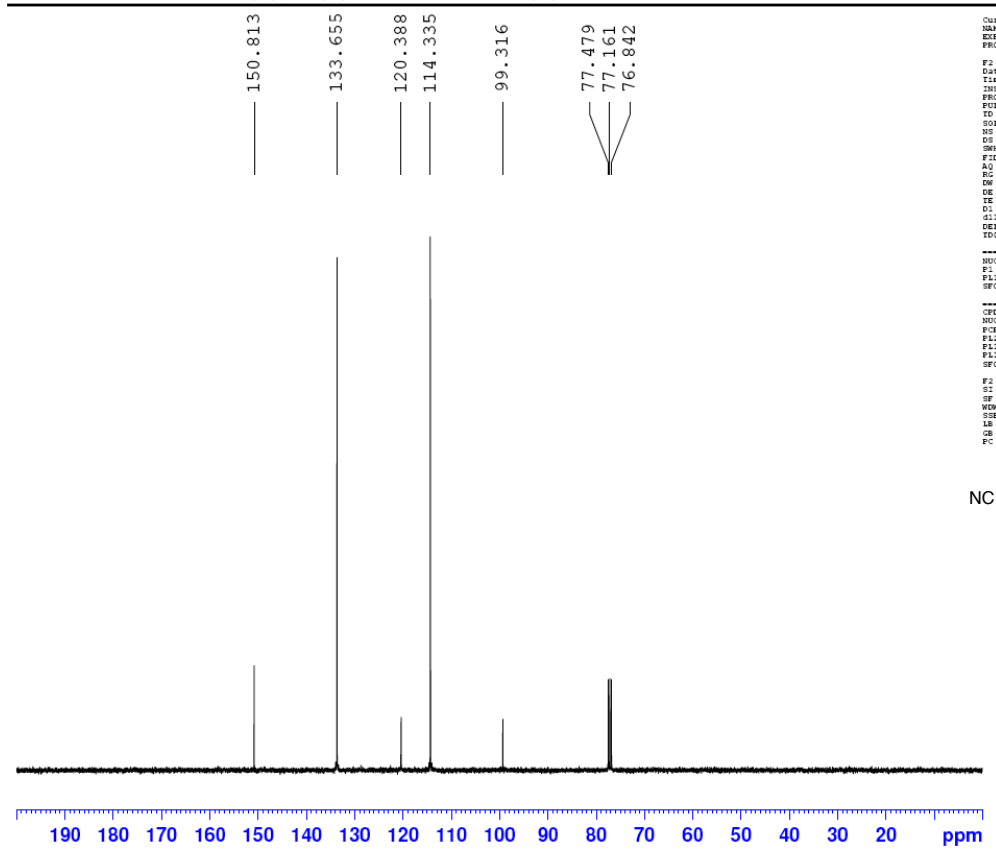

# $^1\text{H}$ and $^{13}\text{C}$ NMR of 4-(Benzyloxy)aniline (**4f**)

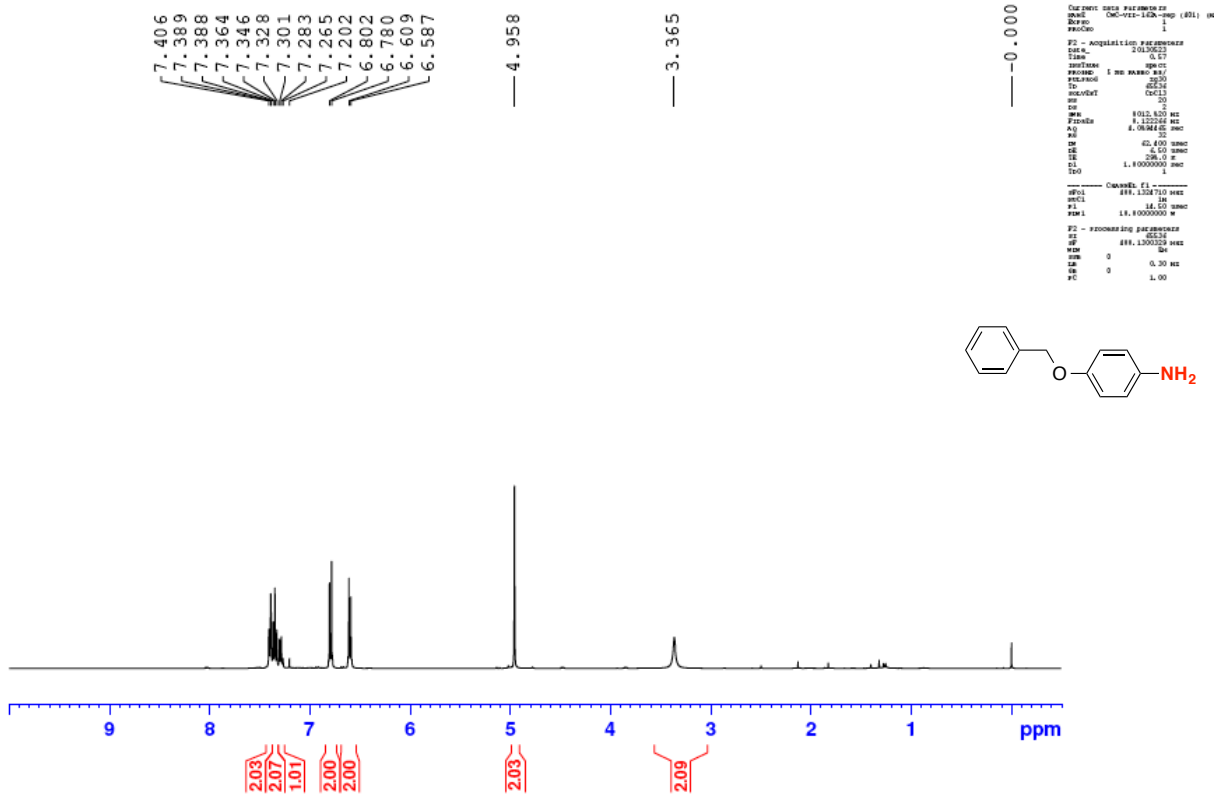

**Output Data Parameters**

```

NAME: 06c-162-162-162 (4f) 1H
EXPNO: 1
PROCNO: 1
F2 - Acquisition Parameters
Date_: 20130523
Time: 09:07
INSTRUM: spect
PROBHD: 1 mm BBO-5
PULPROG: zgpg30
TD: 65536
SOLVENT: CDCl3
NS: 2048
DS: 4
SWH: 8012.830 MHz
FIDRES: 0.122546 MHz
AQ: 0.089416 sec
RG: 32
INTEGR: 45.430 UMNO
DE: 0.50 UMNO
TE: 298.2 K
NUC1: 13C
NUC2: 1H
===== CHANNEL f1 =====
NUC1: 13C
PULPROG: zgpg30
PCPDPRG2: 13C
PCPDPRG1: 13C
===== CHANNEL f2 =====
F2 - Processing parameters
SI: 32768
SF: 125.760 MHz
WDW: EM
SSB: 0
GB: 0
PC: 1.00
  
```

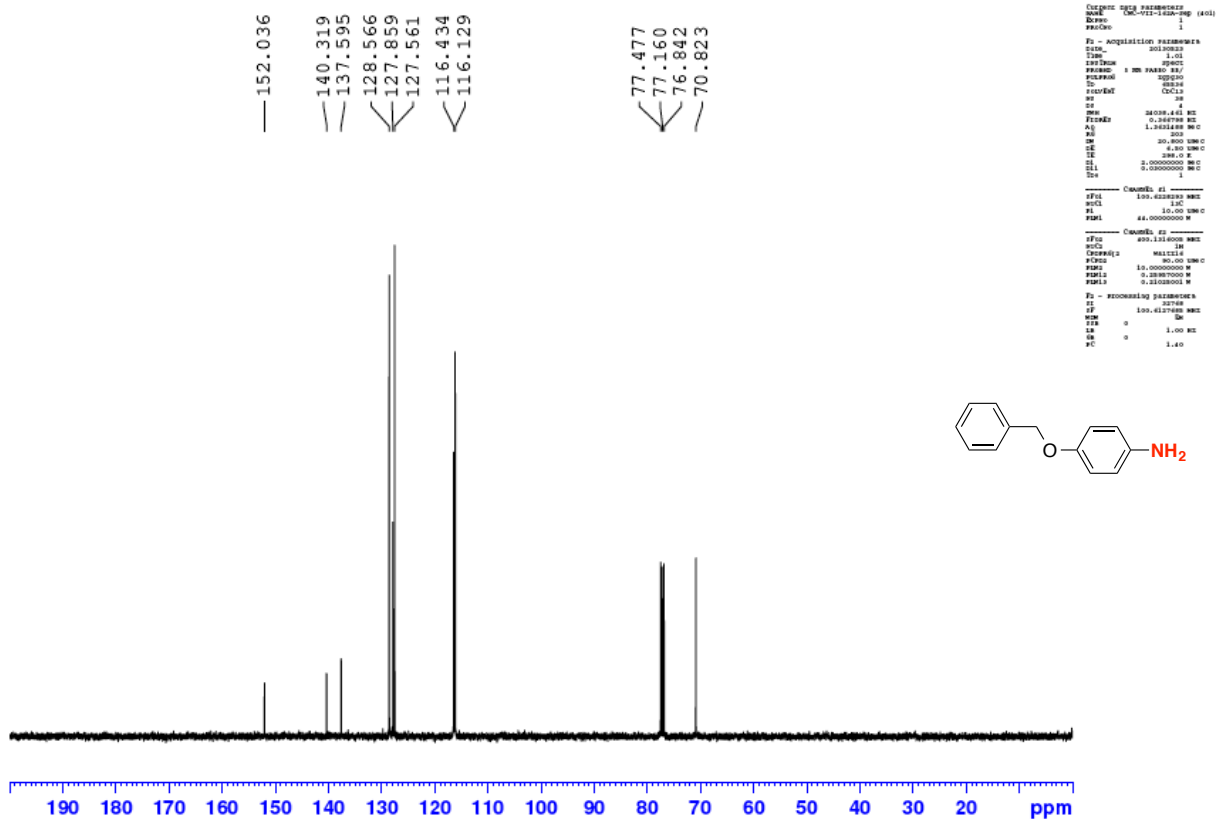

**Output Data Parameters**

```

NAME: 06c-162-162-162 (4f) 13C
EXPNO: 1
PROCNO: 1
F2 - Acquisition Parameters
Date_: 20130523
Time: 09:07
INSTRUM: spect
PROBHD: 1 mm BBO-5
PULPROG: zgpg30
TD: 65536
SOLVENT: CDCl3
NS: 2048
DS: 4
SWH: 8012.830 MHz
FIDRES: 0.122546 MHz
AQ: 0.089416 sec
RG: 32
INTEGR: 45.430 UMNO
DE: 0.50 UMNO
TE: 298.2 K
NUC1: 13C
NUC2: 1H
===== CHANNEL f1 =====
NUC1: 13C
PULPROG: zgpg30
PCPDPRG2: 13C
PCPDPRG1: 13C
===== CHANNEL f2 =====
F2 - Processing parameters
SI: 32768
SF: 125.760 MHz
WDW: EM
SSB: 0
GB: 0
PC: 1.00
  
```

# <sup>1</sup>H and <sup>13</sup>C NMR of Methyl 4-Aminobenzoate (4g)

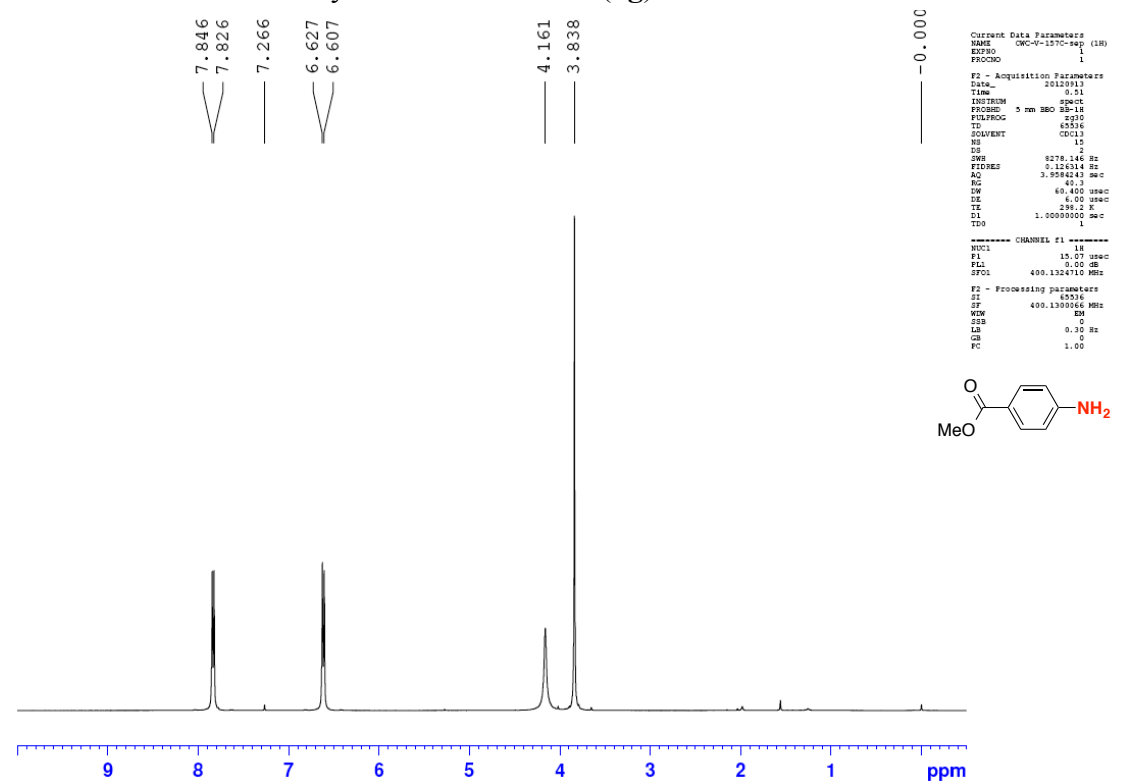

```

Current Data Parameters
NAME      CWC-4-157C-Rep (1H)
EXPNO    1
PROCNO   1

F2 - Acquisition Parameters
Date_    20120913
Time     0.11
INSTRUM  spect
PROBHD   5 mm BBO BB-1H
PULPROG  zg30
TD        65536
SOLVENT  CDCl3
NS        2
DS        2
SWH       8278.146 Hz
FIDRES   0.124334 Hz
AQ        3.958423 sec
RG        48.3
SQ        49.400 usec
DE        6.00 usec
TE        300.2 K
D1        1.00000000 sec
TD0       1

----- CHANNEL f1 -----
NUC1      1H
P1        13.07 usec
PL1       0.00 dB
SFO1      400.1324710 MHz

F2 - Processing parameters
SI        65536
SF        400.1300000 MHz
WDW       EM
SSB       0
LB        0.30 Hz
GB        0
PC        1.00
    
```

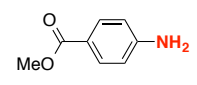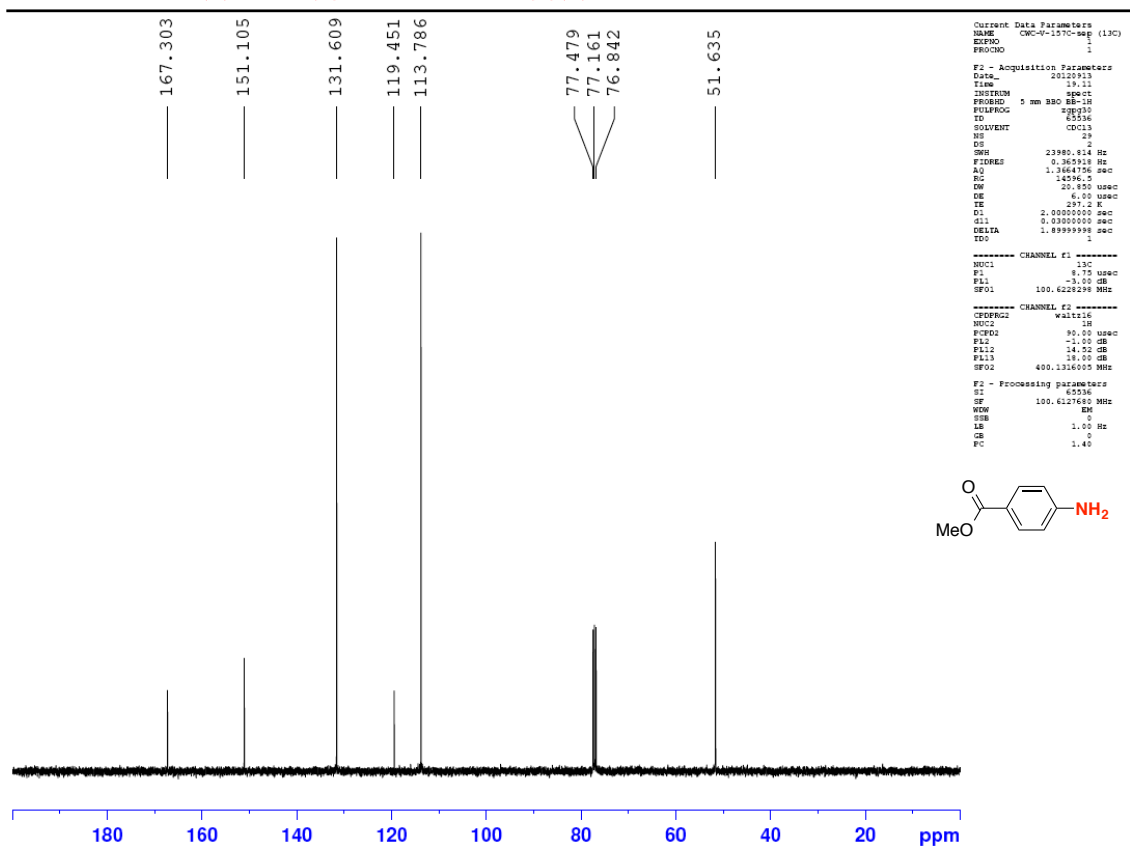

```

Current Data Parameters
NAME      CWC-4-157C-Rep (13C)
EXPNO    1
PROCNO   1

F2 - Acquisition Parameters
Date_    20120913
Time     19.11
INSTRUM  spect
PROBHD   5 mm BBO BB-1H
PULPROG  zgpg30
TD        65536
SOLVENT  CDCl3
NS        2
DS        2
SWH       23980.814 Hz
FIDRES   0.262318 Hz
AQ        1.1264756 sec
RG        12096.5
SQ        20.150 usec
DE        6.00 usec
TE        297.2 K
D1        2.00000000 sec
SOL1     0.03000000 sec
DELTA    1.89999999 sec
TD0       1

----- CHANNEL f1 -----
NUC1      13C
P1        8.75 usec
PL1       -3.00 dB
SFO1      100.6224299 MHz

----- CHANNEL f2 -----
CPDPRG2  waltz16
NUC2      1H
P2        90.00 usec
PL2       -1.00 dB
PL12     -14.52 dB
PL13     -18.00 dB
SFO2      400.1316000 MHz

F2 - Processing parameters
SI        65536
SF        100.6127680 MHz
WDW       EM
SSB       0
LB        1.00 Hz
GB        0
PC        1.00
    
```

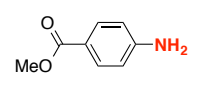

<sup>1</sup>H and <sup>13</sup>C NMR of 4'-Aminoacetophenone (**4h**)

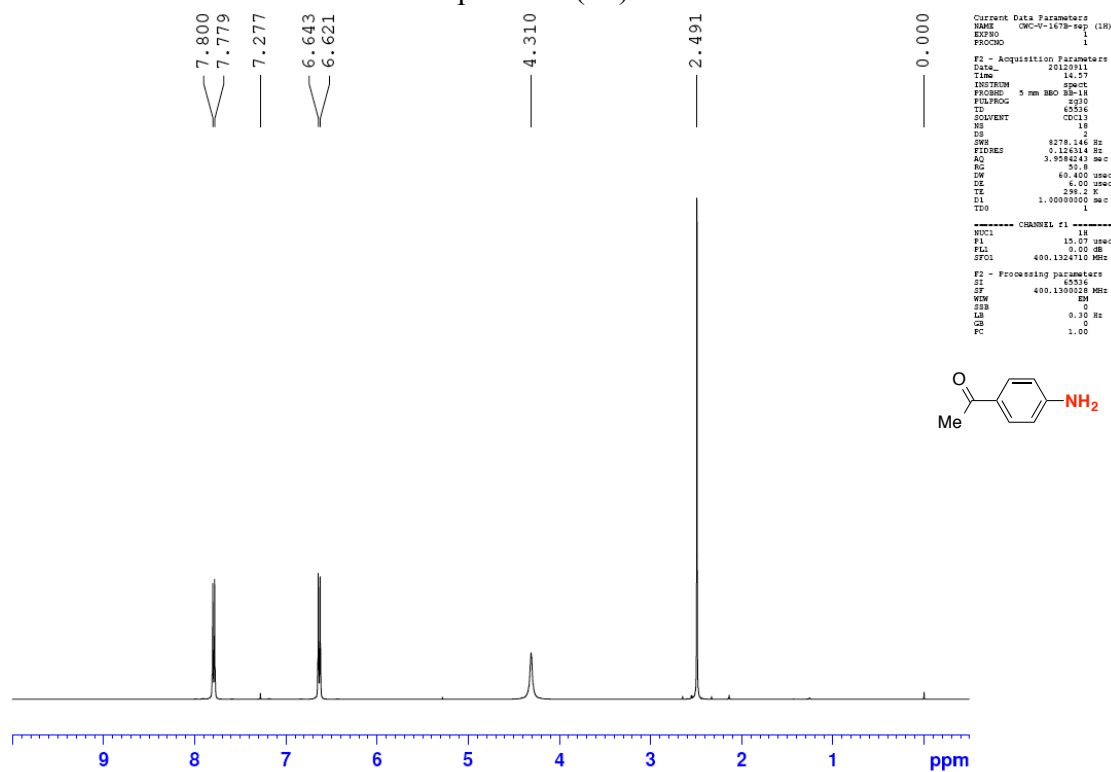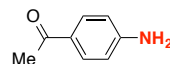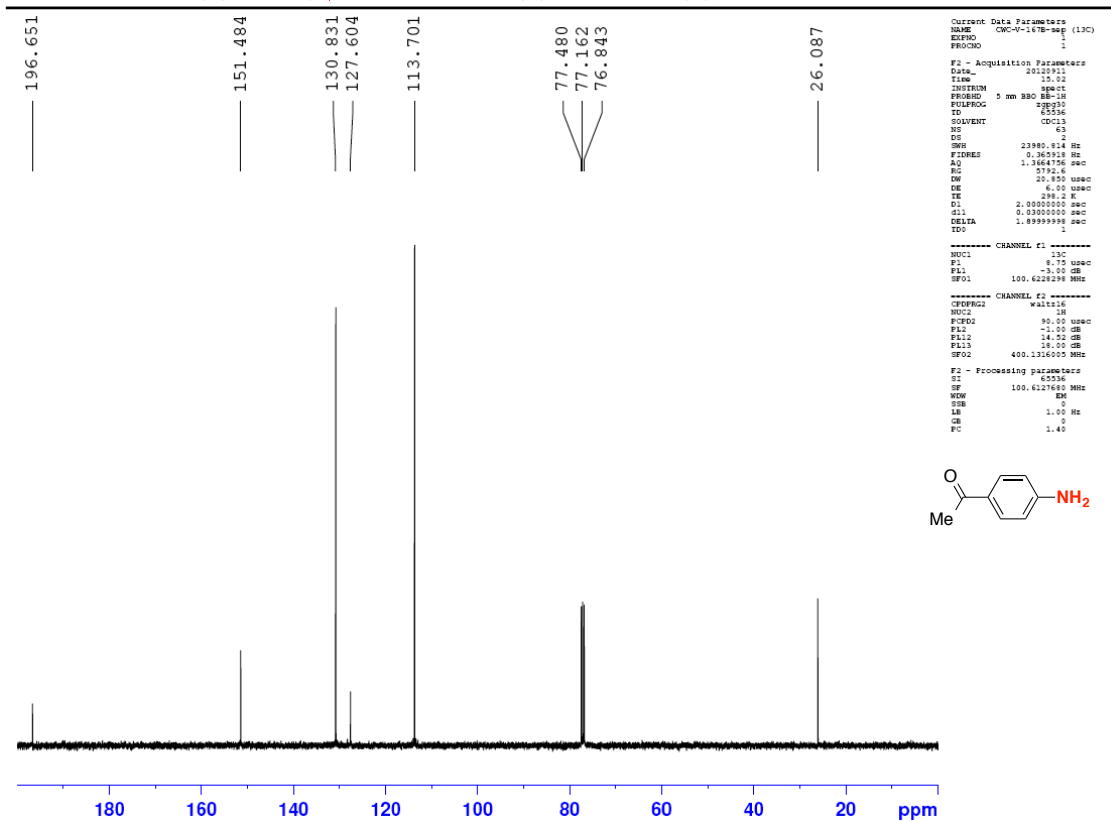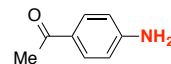

# <sup>1</sup>H and <sup>13</sup>C NMR of 4-Aminobenzophenone (4i)

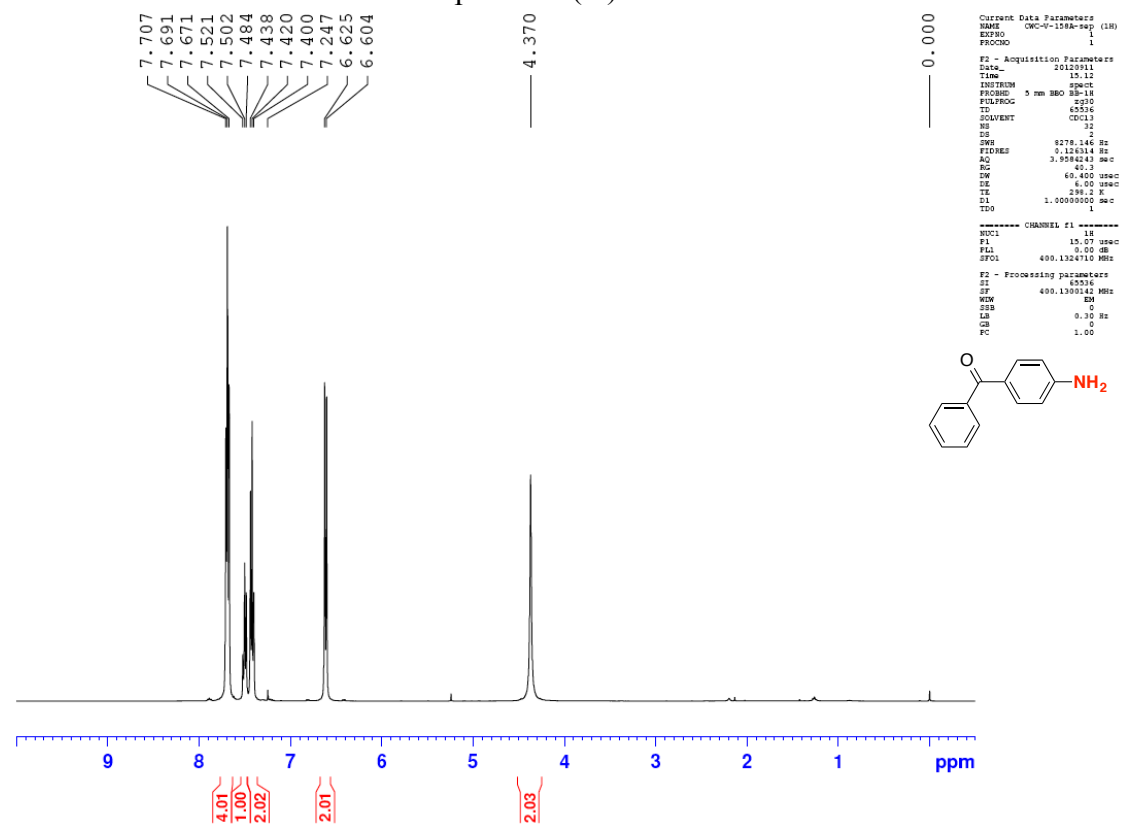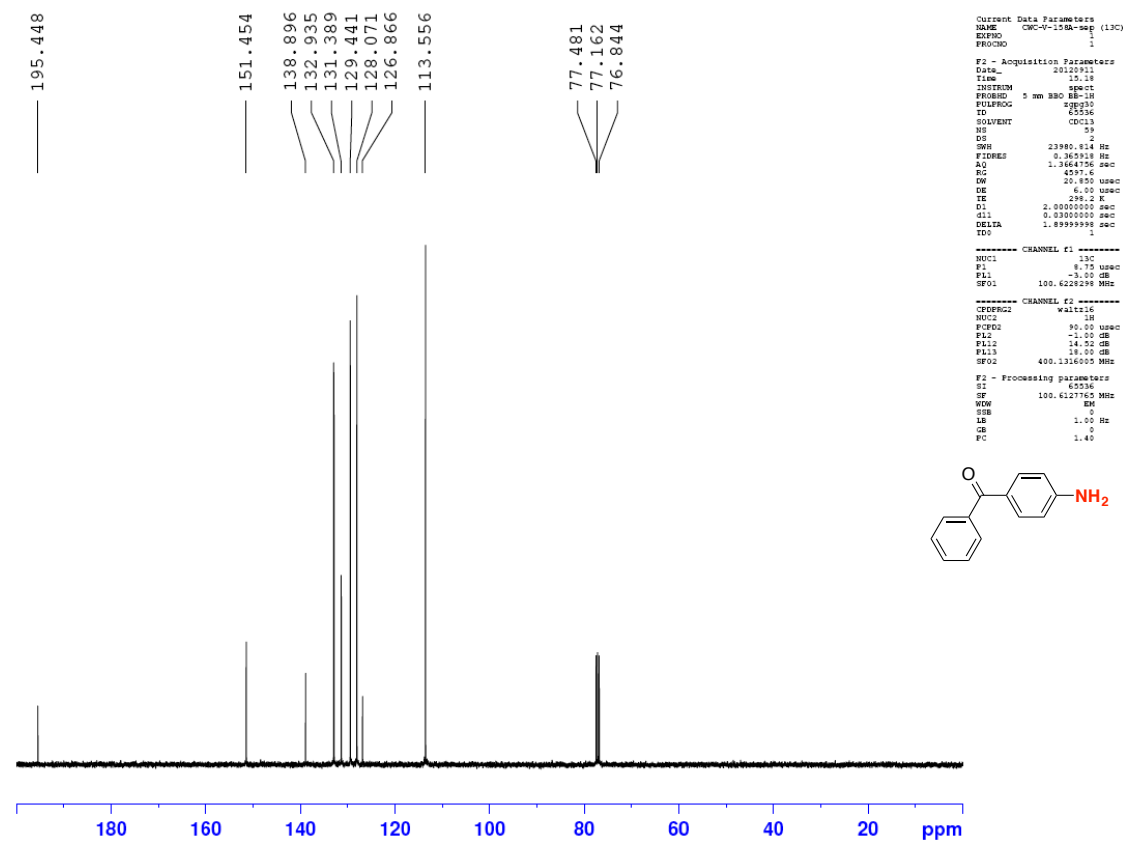

<sup>1</sup>H and <sup>13</sup>C NMR of (4-Aminophenyl)(piperidin-1-yl)methanone (**4j**)

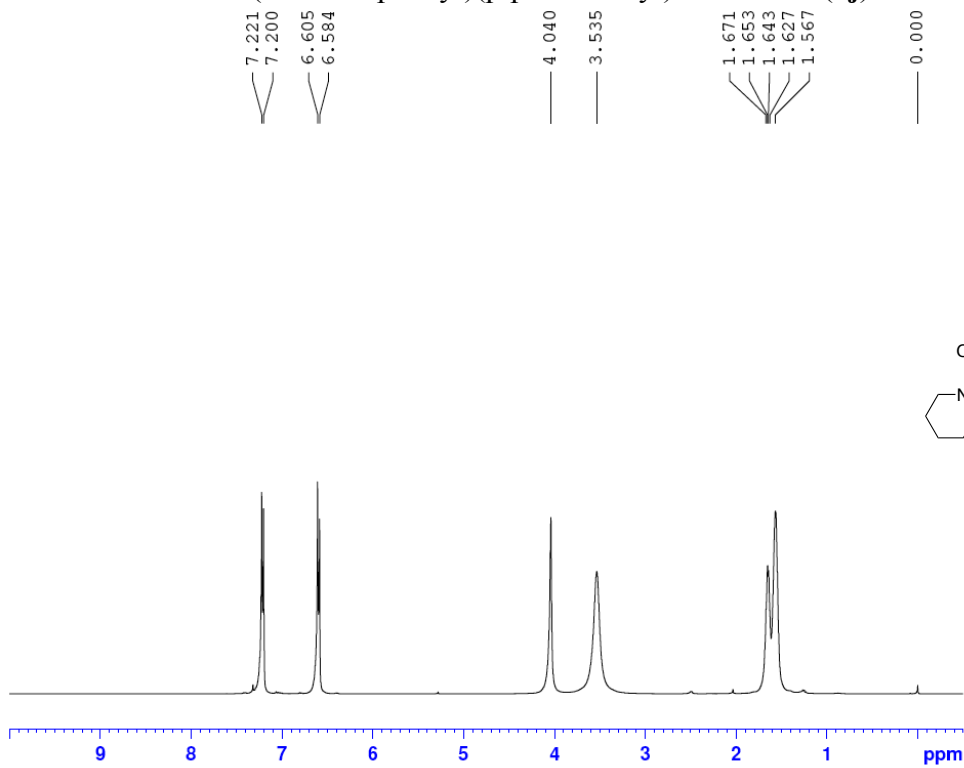

```
Current Data Parameters
NAME      CWC-V-162A-sep (1H)
EXPNO    1
PROCNO   1
F2 - Acquisition Parameters
Date_    20120908
Time     17.17
INSTRUM spect
PROBHD   5 mm BBO BB-1H
PULPROG zgpg30
TD        65536
SOLVENT  CDCl3
NS        2
DS        2
SWH       8278.146 Hz
FIDRES   0.124314 Hz
AQ        3.558443 sec
RG        65.400 usec
RW        65.400 usec
DE        6.00 usec
TE        298.2 K
D1        1.0000000 sec
TD0
----- CHANNEL f1 -----
NUC1      1H
P1        15.00 usec
PL1       0.00 dB
SFO1     400.132410 MHz
F2 - Processing parameters
SI        65536
SF        400.133962 MHz
WDW       EM
SSB       0
LB        0.30 Hz
GB        0
CB        1.00
```

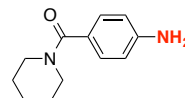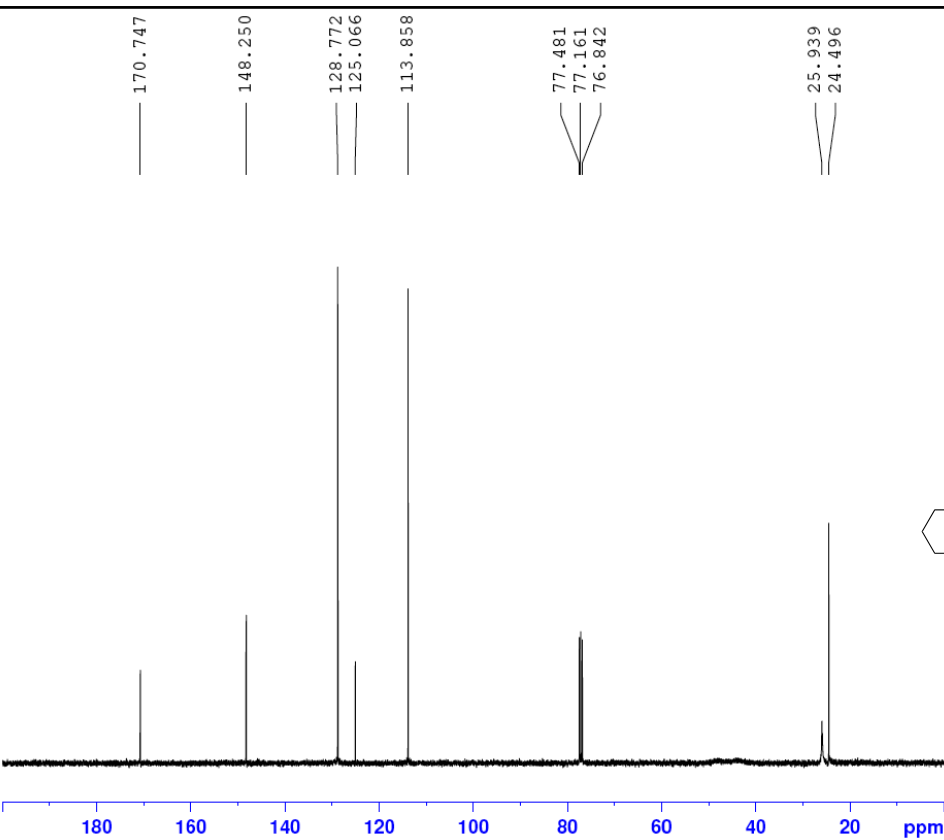

```
Current Data Parameters
NAME      CWC-V-162A-sep (13C)
EXPNO    1
PROCNO   1
F2 - Acquisition Parameters
Date_    20120917
Time     17.12
INSTRUM spect
PROBHD   5 mm BBO BB-1H
PULPROG zgpg30
TD        65536
SOLVENT  CDCl3
NS        2
DS        2
SWH       23980.814 Hz
FIDRES   0.363918 Hz
AQ        1.3684706 sec
RG        14596.5
RW        20.800 usec
DE        6.00 usec
TE        297.2 K
D1        2.0000000 sec
d11      0.0000000 sec
DELTA    1.8999999 sec
TD0
----- CHANNEL f1 -----
NUC1      13C
P1        8.70 usec
PL1       -3.50 dB
SFO1     100.6228298 MHz
----- CHANNEL f2 -----
CPDPRG2 waltz16
NUC2      1H
P2        90.00 usec
PL2       -1.00 dB
PL12      14.00 dB
PL13      18.00 dB
SFO2     400.1316000 MHz
F2 - Processing parameters
SI        65536
SF        100.6127846 MHz
WDW       EM
SSB       0
LB        1.00 Hz
GB        0
CB        1.40
```

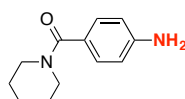

<sup>1</sup>H and <sup>13</sup>C NMR of 4-Amino-*N,N*-diethylbenzamide (**4k**)

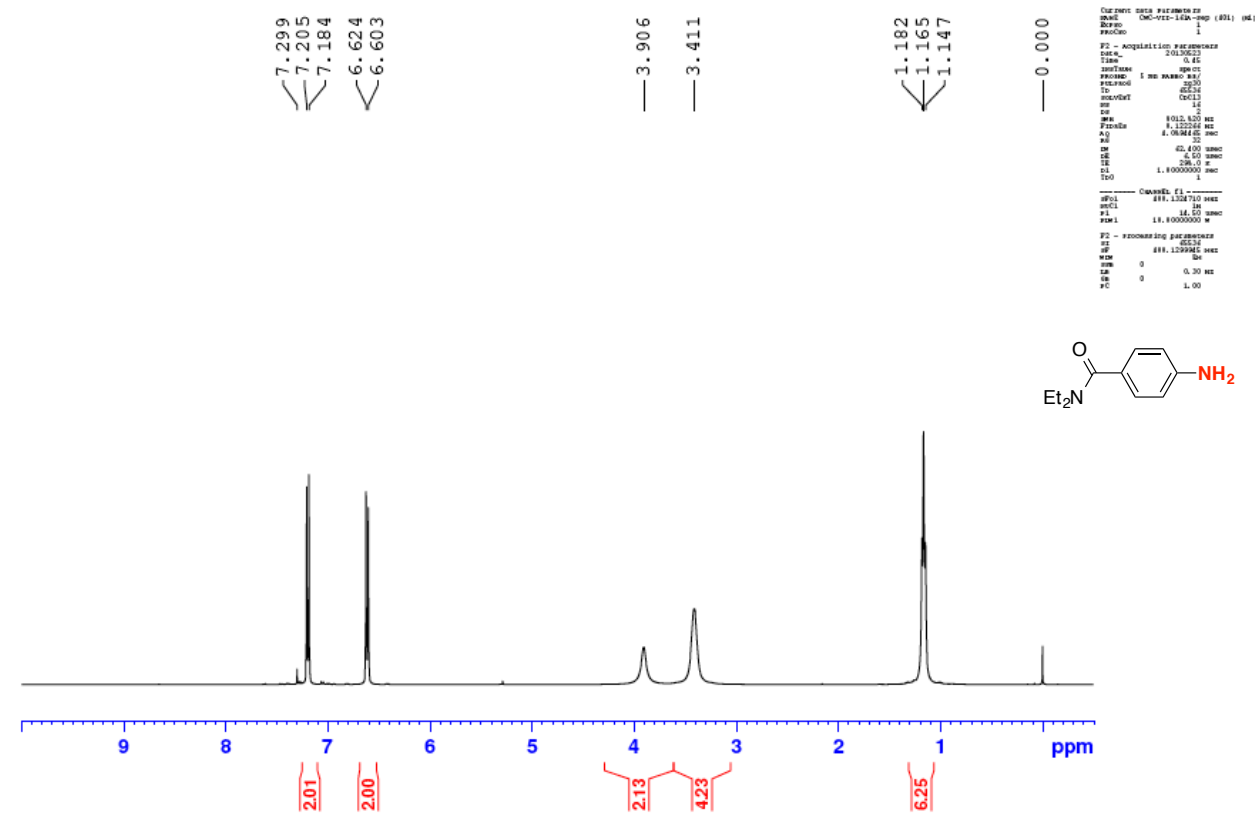

```

===== CHANNEL f1 =====
NAME          CMC-VII-16A-exp (01) (04)
EXPNO         1
PROCNO        1
F2 - Acquisition Parameters
Date_         20120520
Time          15.32
INSTRUM       spect
PROBHD        5 mm BBOBO-90
PULPROG       zgpg30
TD            65536
SOLVENT       CDCl3
NS            25
DS            4
SWH           24039.444 Hz
FIDRES       0.366790 Hz
AQ           1.3624490 sec
RG            303
WDW           20.900 usec
SS            20.000 usec
LB            0.300 Hz
GB            0
PC            1.0000000 sec
D1            0.03000000 sec
D11           1
TD0           1

===== CHANNEL f2 =====
NAME          CMC-VII-16A-exp (01) (04)
EXPNO         1
PROCNO        1
F2 - Acquisition Parameters
Date_         20120520
Time          15.32
INSTRUM       spect
PROBHD        5 mm BBOBO-90
PULPROG       zgpg30
TD            65536
SOLVENT       CDCl3
NS            25
DS            4
SWH           24039.444 Hz
FIDRES       0.366790 Hz
AQ           1.3624490 sec
RG            303
WDW           20.900 usec
SS            20.000 usec
LB            0.300 Hz
GB            0
PC            1.0000000 sec
D1            0.03000000 sec
D11           1
TD0           1
    
```

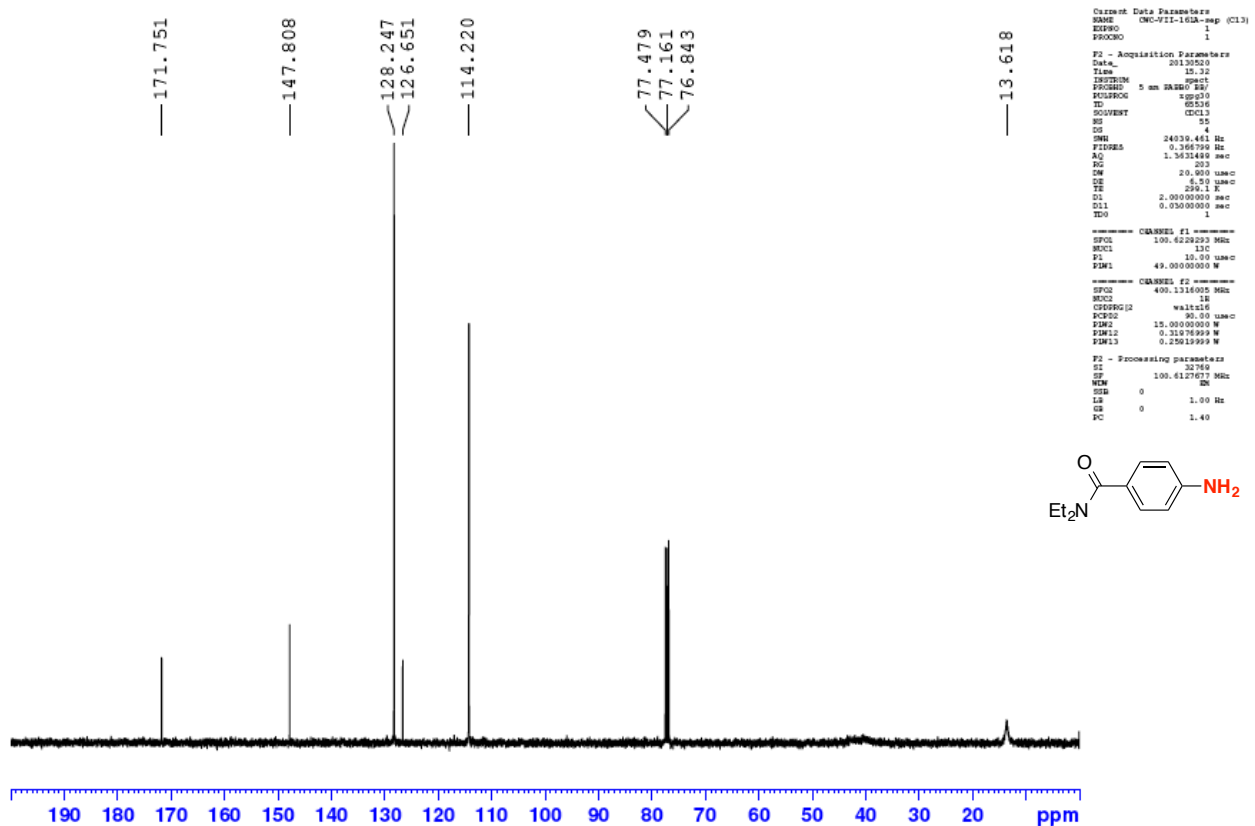

```

===== CHANNEL f1 =====
NAME          CMC-VII-16A-exp (01) (04)
EXPNO         1
PROCNO        1
F2 - Acquisition Parameters
Date_         20120520
Time          15.32
INSTRUM       spect
PROBHD        5 mm BBOBO-90
PULPROG       zgpg30
TD            65536
SOLVENT       CDCl3
NS            25
DS            4
SWH           24039.444 Hz
FIDRES       0.366790 Hz
AQ           1.3624490 sec
RG            303
WDW           20.900 usec
SS            20.000 usec
LB            0.300 Hz
GB            0
PC            1.0000000 sec
D1            0.03000000 sec
D11           1
TD0           1

===== CHANNEL f2 =====
NAME          CMC-VII-16A-exp (01) (04)
EXPNO         1
PROCNO        1
F2 - Acquisition Parameters
Date_         20120520
Time          15.32
INSTRUM       spect
PROBHD        5 mm BBOBO-90
PULPROG       zgpg30
TD            65536
SOLVENT       CDCl3
NS            25
DS            4
SWH           24039.444 Hz
FIDRES       0.366790 Hz
AQ           1.3624490 sec
RG            303
WDW           20.900 usec
SS            20.000 usec
LB            0.300 Hz
GB            0
PC            1.0000000 sec
D1            0.03000000 sec
D11           1
TD0           1
    
```

# <sup>1</sup>H and <sup>13</sup>C NMR of 4-Vinylaniline (4I)

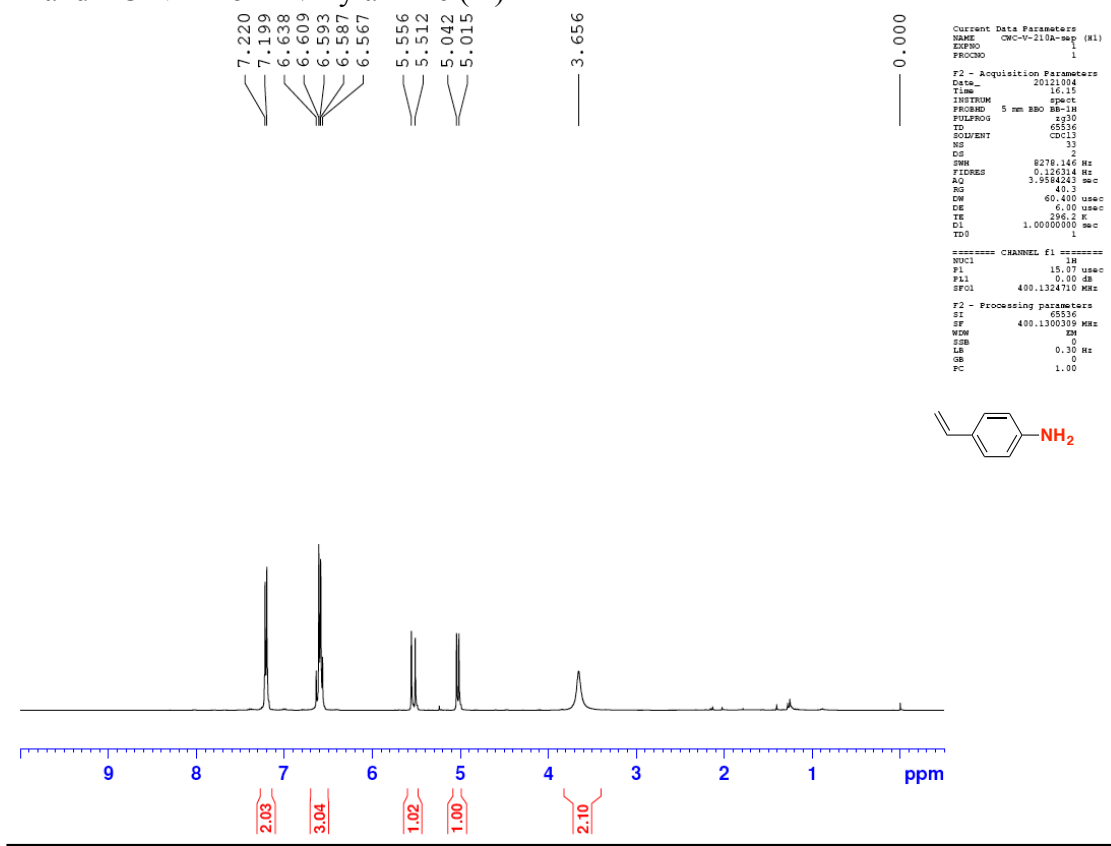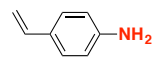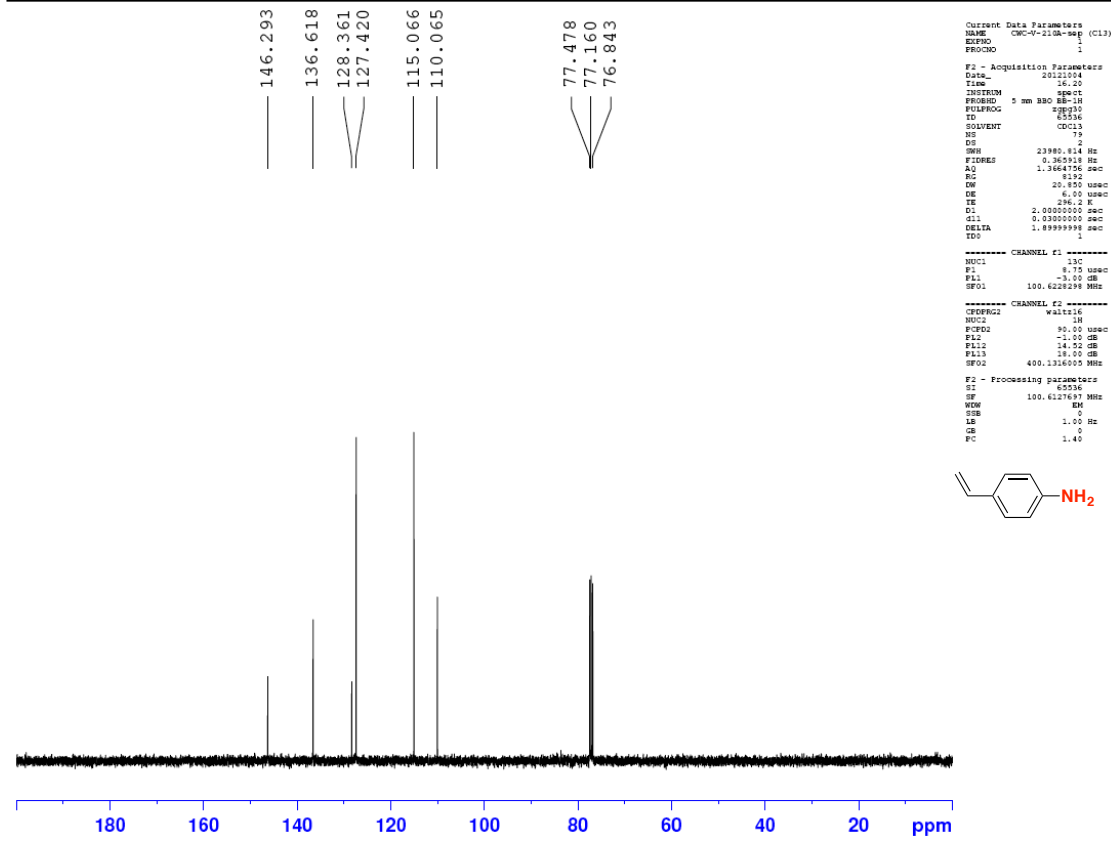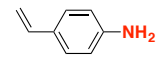



<sup>1</sup>H and <sup>13</sup>C NMR of 4-(1H-Pyrrol-1-yl)aniline (**4m**)

7.133  
7.112  
6.946  
6.941  
6.936  
6.631  
6.609  
6.291  
6.285  
6.280

3.580

0.000

```
Current Data Parameters
NAME      CWC-VI-648-sep (H1)
EXPNO    1
PROCNO   1

F2 - Acquisition Parameters
Date_    20121203
Time     9.27
INSTRUM  spect
PROBHD   5 mm PABBO BB
PULPROG  zgpg30
TD       65536
SOLVENT  CDCl3
NS       37
DS       2
SWH      9012.920 Hz
FIDRES   0.122286 Hz
AQ       4.0894465 sec
RG       32
OW       62.400 usec
DE       6.50 usec
TE       298.2 K
D1       1.00000000 sec
TD0      1

----- CHANNEL f1 -----
SFO1     400.1324710 MHz
NUC1     1H
P1       14.50 usec
PL1      0.00000000 M

F2 - Processing Parameters
SI       65536
SF       400.1300554 MHz
WDW      EM
SSB      0
LB       0.30 Hz
GB       0
PC       1.00
```

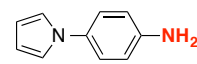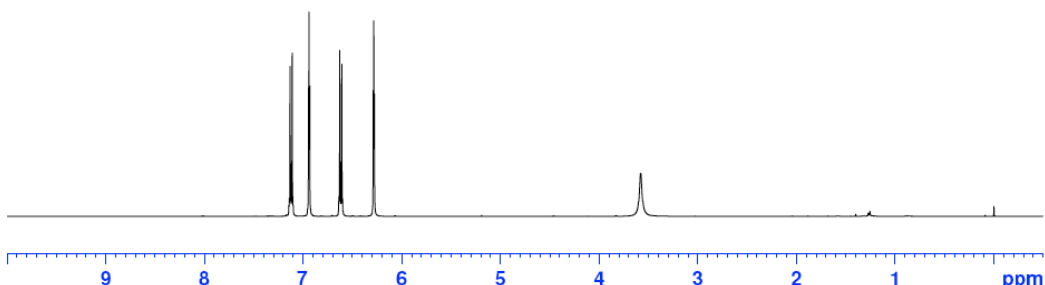

144.614  
132.787  
122.300  
119.684  
115.638  
109.497

77.478  
77.160  
76.841

```
Current Data Parameters
NAME      CWC-VI-648-sep (C13)
EXPNO    1
PROCNO   1

F2 - Acquisition Parameters
Date_    20121203
Time     9.30
INSTRUM  spect
PROBHD   5 mm PABBO BB
PULPROG  zgpg30
TD       65536
SOLVENT  CDCl3
NS       44
DS       4
SWH      24038.461 Hz
FIDRES   0.348758 Hz
AQ       1.3631488 sec
RG       200
OW       20.900 usec
DE       6.50 usec
TE       298.2 K
D1       1.00000000 sec
D11      0.00000000 sec
TD0      1

----- CHANNEL f1 -----
SFO1     100.6261797 MHz
NUC1     13C
P1       10.00 usec
PL1      44.00000000 M

----- CHANNEL f2 -----
SFO2     400.1316005 MHz
NUC2     1H
PCPD2    waltz16
PCPD2    50.00 usec
PLM2     10.00000000 M
PLM2     0.28877000 M
PLM2     0.21025001 M

F2 - Processing Parameters
SI       26754
SF       100.6127803 MHz
WDW      EM
SSB      0
LB       1.00 Hz
GB       0
PC       1.40
```

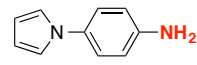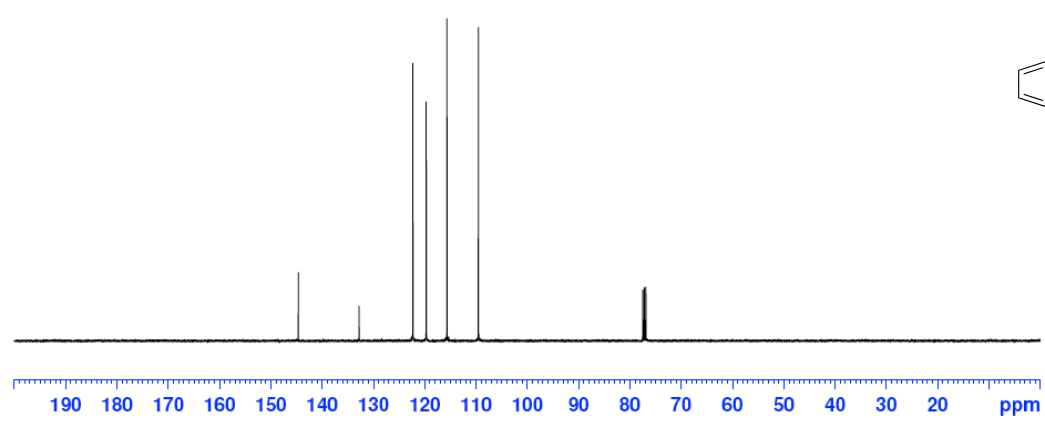



# <sup>1</sup>H and <sup>13</sup>C NMR of 4-(Benzothiazol-2-yl)aniline (4o)

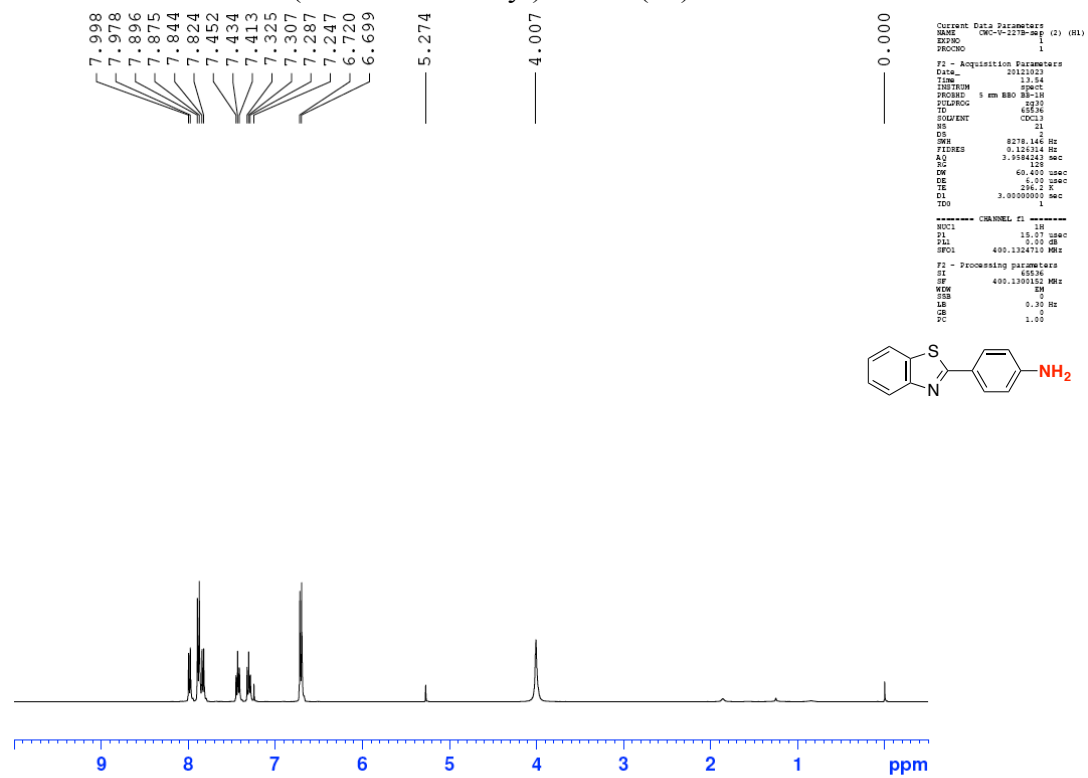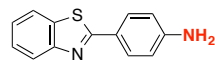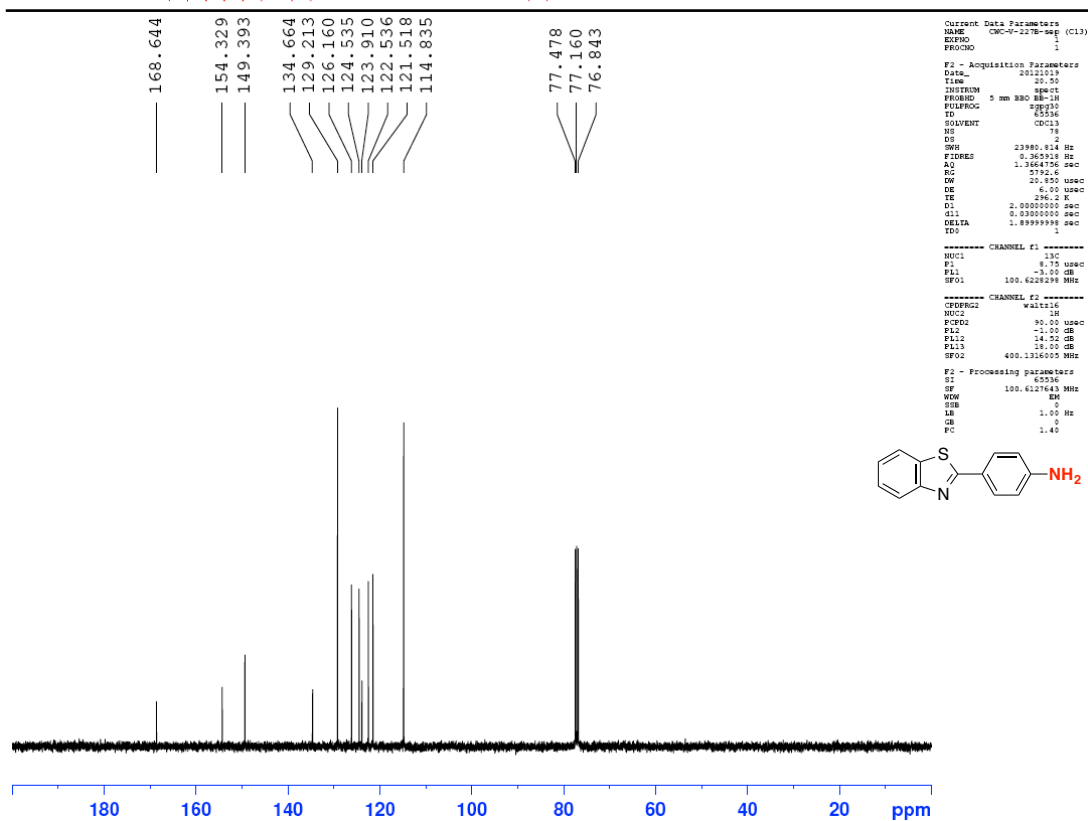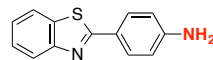

<sup>1</sup>H and <sup>13</sup>C NMR of 5-Aminobenzo[1,3]dioxole (**4p**)

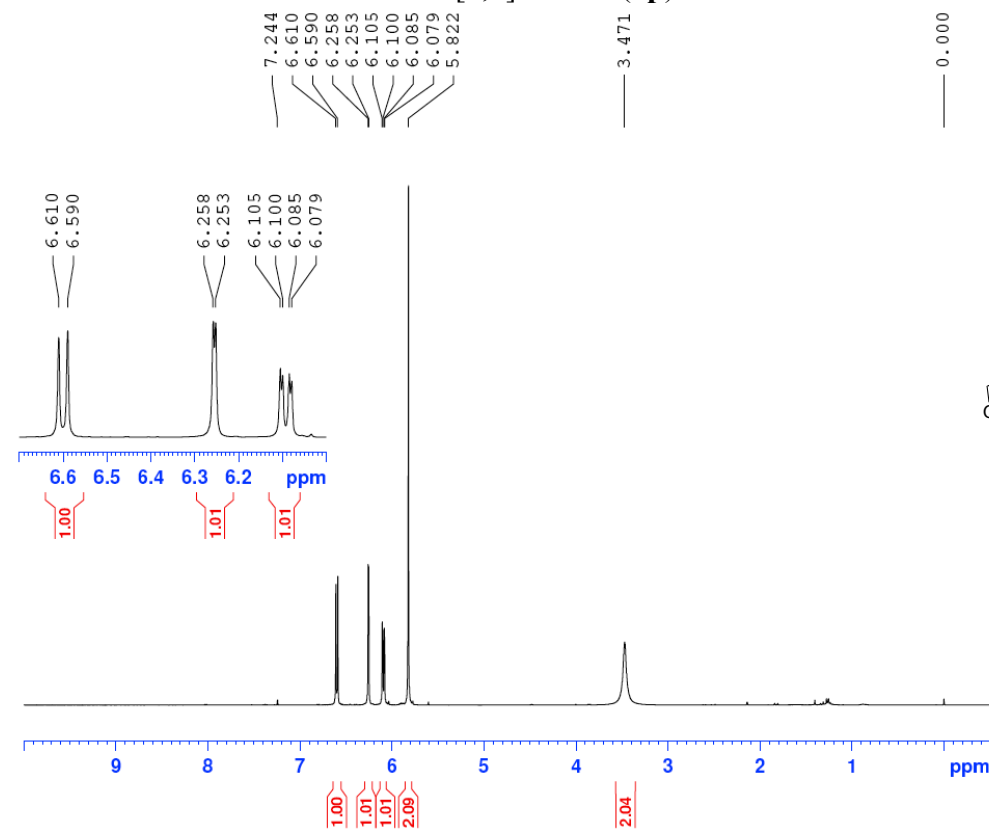

```
Current Data Parameters
NAME CWC-V-174A-sep (1H)
EXPNO 1
PROCNO 1
F2 - Acquisition Parameters
Date_ 20120914
Time 4.01
INSTRUM spect
PROBHD 5 mm BBO BB-1H
PULPROG zgpg
TD 65536
SOLVENT CDCl3
NS 32
DS 2
SWH 8278.144 Hz
FIDRES 0.120314 Hz
AQ 3.259423 sec
RG 50.5
SM 60.400 usec
DE 1.00 usec
TE 297.2 K
D1 1.00000000 sec
TD0 1
----- CHANNEL f1 -----
NUC1 1H
P1 15.07 usec
PL1 0.00 dB
SFO1 400.1324710 MHz
F2 - Processing parameters
SI 65536
SF 400.1300159 MHz
WDW EM
SSB 0
LB 0.10 Hz
GB 0
PC 1.00
```

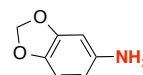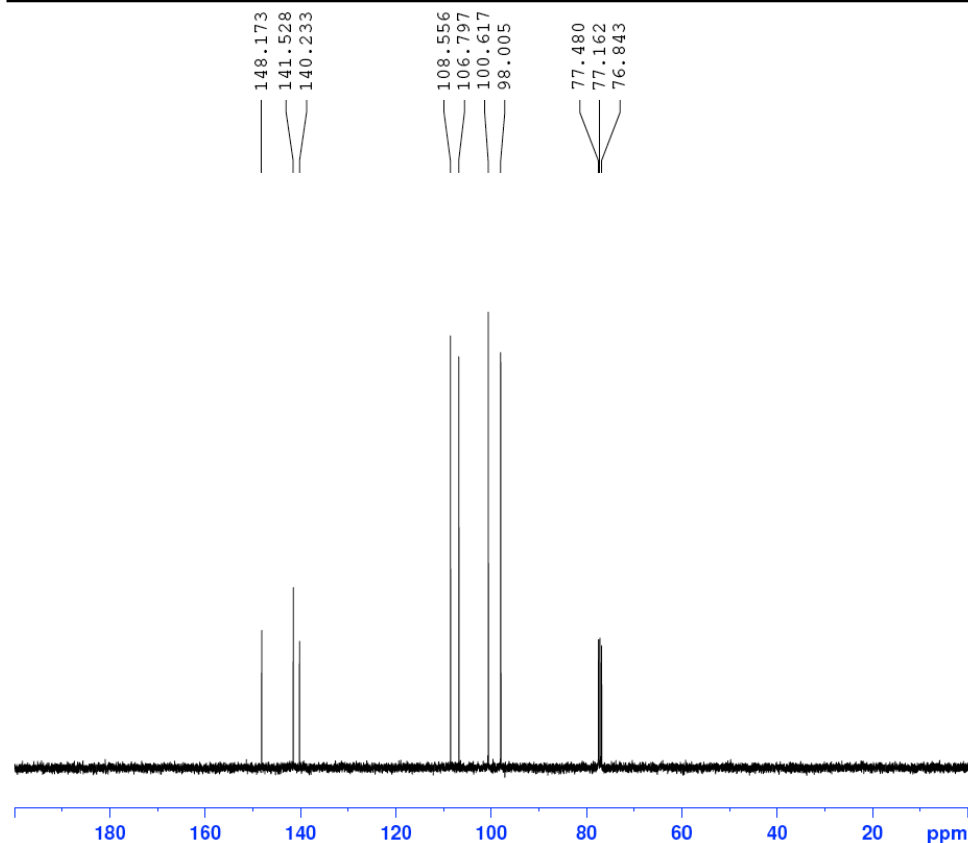

```
Current Data Parameters
NAME CWC-V-174A-sep (13C)
EXPNO 1
PROCNO 1
F2 - Acquisition Parameters
Date_ 20120917
Time 17.52
INSTRUM spect
PROBHD 5 mm BBO BB-1H
PULPROG zgpg
TD 65536
SOLVENT CDCl3
NS 27
DS 2
SWH 23980.814 Hz
FIDRES 0.263058 Hz
AQ 1.164976 sec
RG 832
SM 20.850 usec
DE 6.50 usec
TE 297.2 K
D1 2.00000000 sec
d11 0.33000000 sec
DELTA 1.89999998 sec
TD0 1
----- CHANNEL f1 -----
NUC1 13C
P1 8.75 usec
PL1 -3.00 dB
SFO1 100.6228298 MHz
----- CHANNEL f2 -----
CPDPRG2 waltz16
NUC2 1H
PCPD2 90.00 usec
PL2 -1.00 dB
PL12 14.00 dB
PL13 18.00 dB
SFO2 400.1316000 MHz
F2 - Processing parameters
SI 65536
SF 100.6127738 MHz
WDW EM
SSB 0
LB 1.00 Hz
GB 0
PC 1.40
```

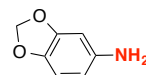

<sup>1</sup>H and <sup>13</sup>C NMR of 2-Amino-9H-thioxanthen-9-one (4q)

8.448  
8.428  
7.736  
7.716  
7.685  
7.678  
7.671  
7.653  
7.651  
7.510  
7.492  
7.471  
7.112  
7.106  
7.091  
7.085  
5.689  
3.381  
2.500

```
Current Data Parameters
NAME CMC-V-218-sep (d1e4) (M1)
EXPNO 1
PROCNO 1
F2 - Acquisition Parameters
Date_ 201203
Time 16.34
INSTRUM spect
PROBHD 5 mm BBO BB-1H
PULPROG zgpg30
TD 65536
SOLVENT DMSO
NS 32
DS 2
SWH 8278.142 Hz
FIDRES 0.126334 Hz
AQ 1.2664796 sec
RG 18390.4
SM 20.000 usec
DE 6.00 usec
TE 296.2 K
D1 2.00000000 sec
d11 0.03000000 sec
DELTA 2.89999998 sec
TD0 1
```

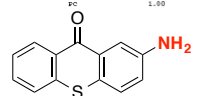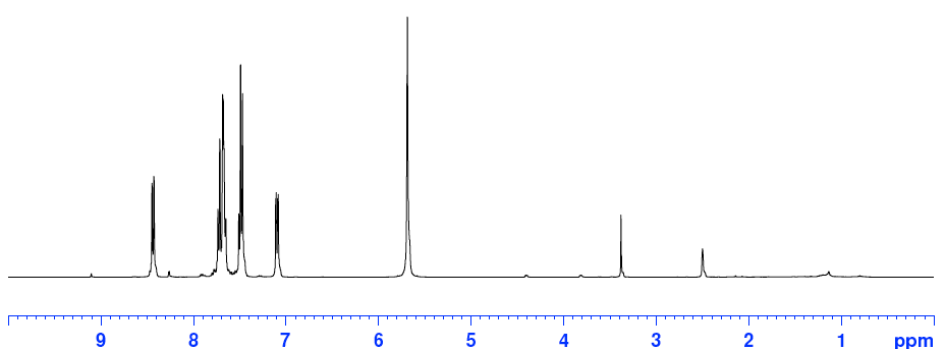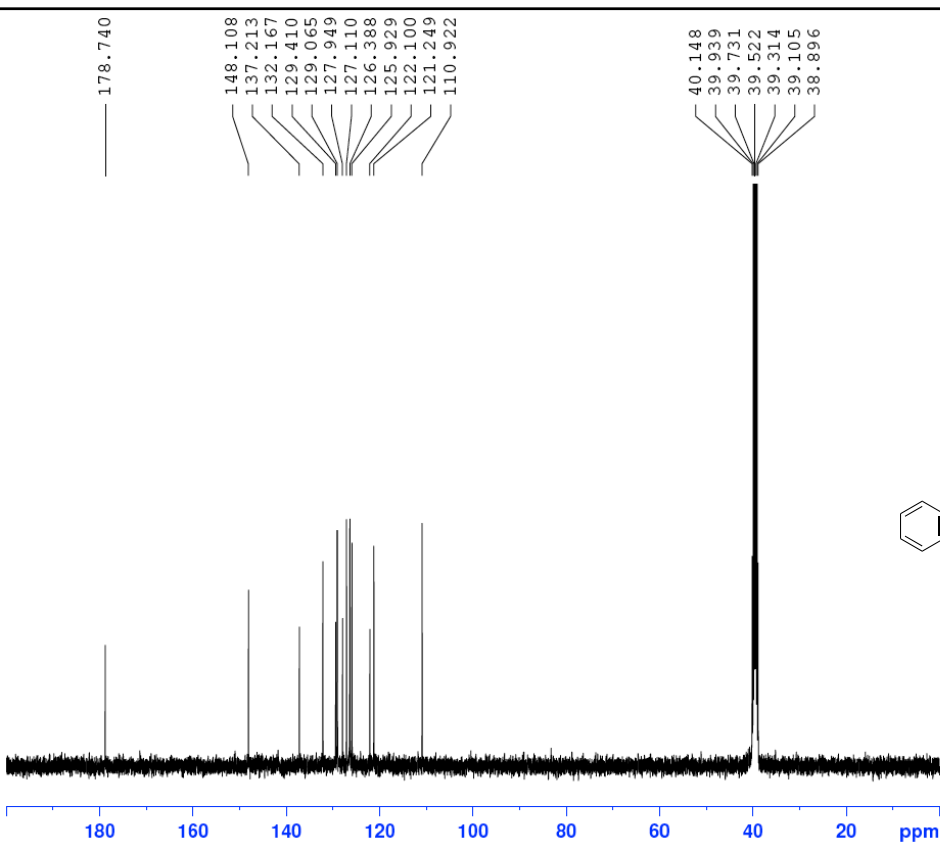

```
Current Data Parameters
NAME CMC-V-218-sep (C13)
EXPNO 1
PROCNO 1
F2 - Acquisition Parameters
Date_ 201203
Time 14.59
INSTRUM spect
PROBHD 5 mm BBO BB-1H
PULPROG zgpg30
TD 65536
SOLVENT DMSO
NS 32
DS 2
SWH 23980.814 Hz
FIDRES 0.365918 Hz
AQ 1.2664796 sec
RG 18390.4
SM 20.000 usec
DE 6.00 usec
TE 296.2 K
D1 2.00000000 sec
d11 0.03000000 sec
DELTA 2.89999998 sec
TD0 1
----- CHANNEL f1 -----
NUC1 13C
P1 8.75 usec
PL1 -2.00 dB
SFO1 100.628298 MHz
----- CHANNEL f2 -----
CPDPRG2 waltz16
NUC2 1H
P2 90.00 usec
PL2 -1.00 dB
PL12 14.32 dB
PL13 18.00 dB
SFO2 400.1316000 MHz
F2 - Processing parameters
SI 65536
SF 100.6128139 MHz
WDW EM
SSB 0
LB 1.00 Hz
GB 0
PC 1.40
```

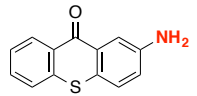

<sup>1</sup>H and <sup>13</sup>C NMR of 3-Fluoro-5-methoxyaniline (4r)

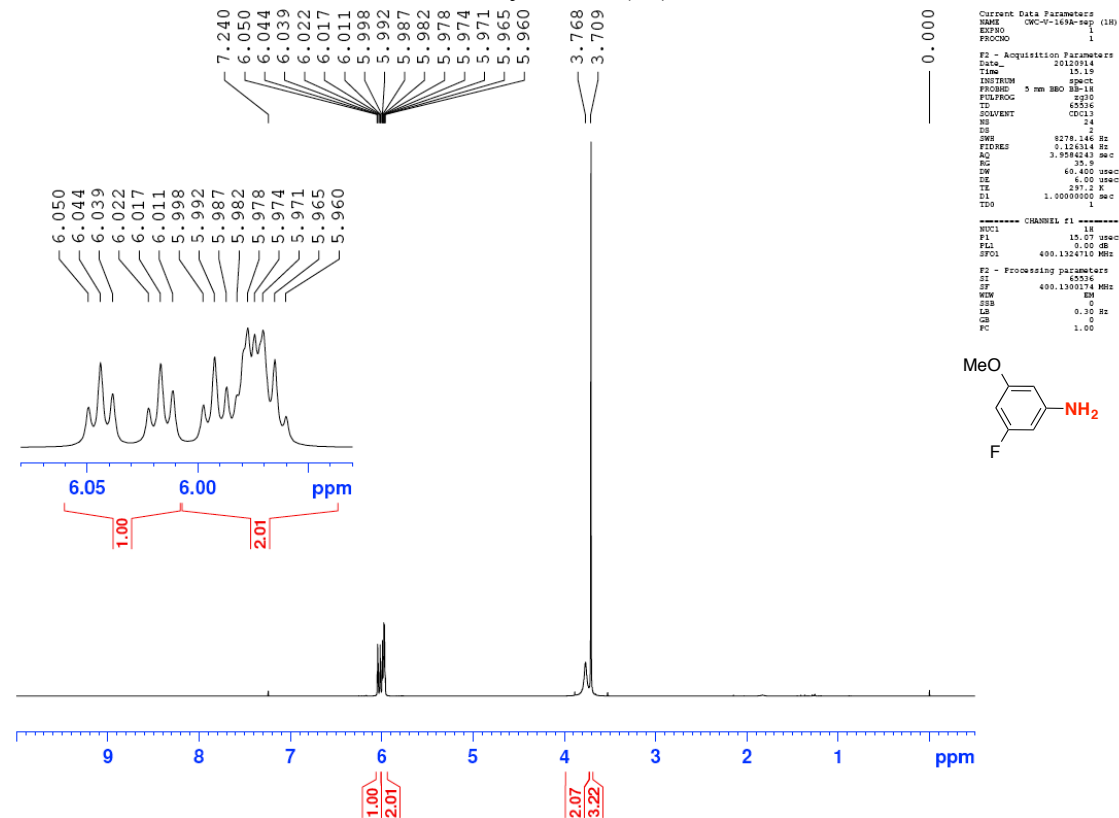

```

Current Data Parameters
NAME CWC-169A-sep (1H)
EXPNO 1
PROCNO 1
F2 - Acquisition Parameters
Data_ 20120914
Time 15.19
INSTRUM spect
PROBHD 5 mm BBO BB-1H
PULPROG zgpg30
TD 65536
SOLVENT CDCl3
NS 24
DS 2
SFE 8278.146 Hz
FIDRES 0.126314 Hz
AQ 3.5086243 sec
RG 50.8
SQ 60.400 usec
DE 6.00 usec
TE 298.2 K
D1 1.00000000 sec
TD0
----- CHANNEL f1 -----
NUC1 1H
P1 15.07 usec
PL1 0.00 dB
SFO1 400.1324710 MHz
F2 - Processing parameters
SI 65536
SF 400.1300174 MHz
WDW EM
SSB 0
LB 0.30 Hz
GB 0
PC 1.00
    
```

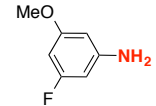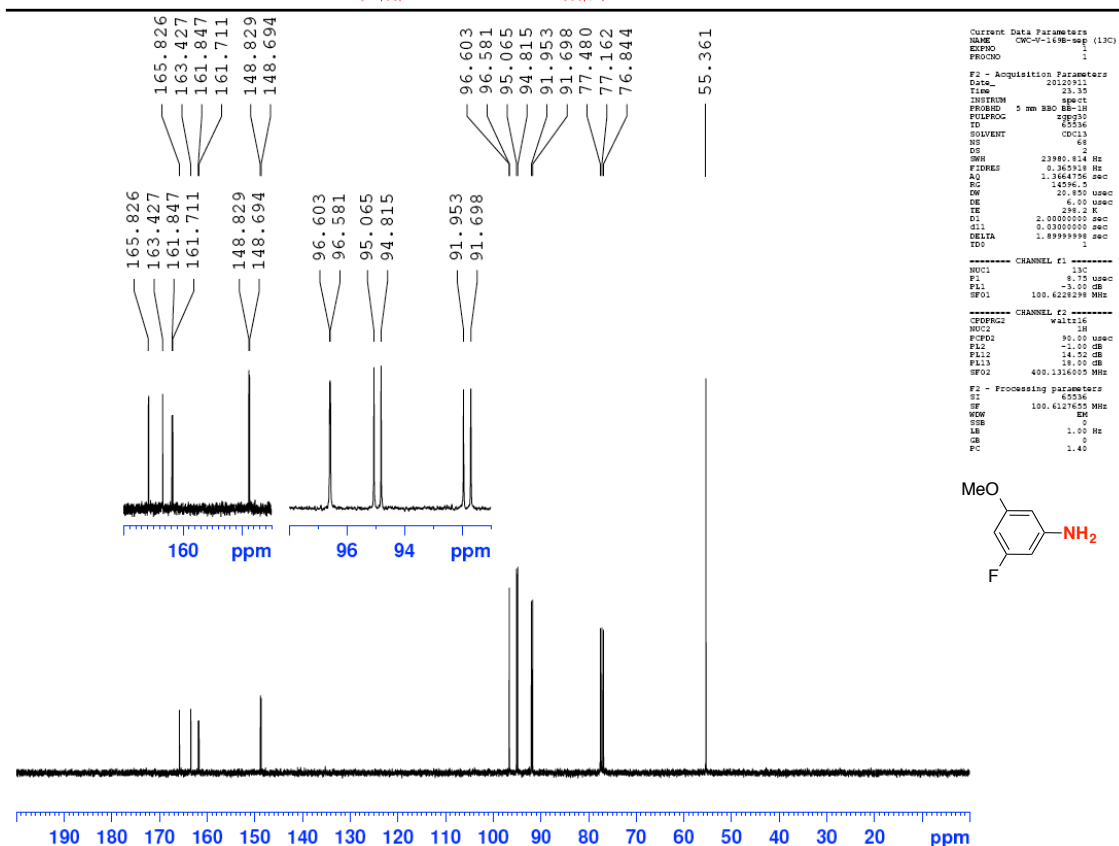

```

Current Data Parameters
NAME CWC-169A-sep (13C)
EXPNO 1
PROCNO 1
F2 - Acquisition Parameters
Data_ 20120911
Time 23.10
INSTRUM spect
PROBHD 5 mm BBO BB-1H
PULPROG zgpg30
TD 65536
SOLVENT CDCl3
NS 68
DS 8
SFE 23990.814 Hz
FIDRES 0.262918 Hz
AQ 1.1664756 sec
RG 14296.0
SQ 20.850 usec
DE 6.00 usec
TE 298.2 K
D1 2.00000000 sec
d11 0.03000000 sec
DELTA 1.89999999 sec
TD0
----- CHANNEL f1 -----
NUC1 13C
P1 8.75 usec
PL1 -3.00 dB
SFO1 100.6228289 MHz
----- CHANNEL f2 -----
CPROG2 waltz16
NUC2 1H
P2F01 90.00 usec
PL2 -1.00 dB
P2F02 14.00 usec
PL2 14.00 dB
P2F03 18.00 usec
PL2 18.00 dB
SFO2 400.1316005 MHz
F2 - Processing parameters
SI 65536
SF 100.6127655 MHz
WDW EM
SSB 0
LB 1.00 Hz
GB 0
PC 1.40
    
```

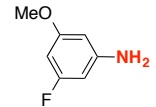

<sup>1</sup>H and <sup>13</sup>C NMR of 3-Chloro-5-fluoroaniline (4s)

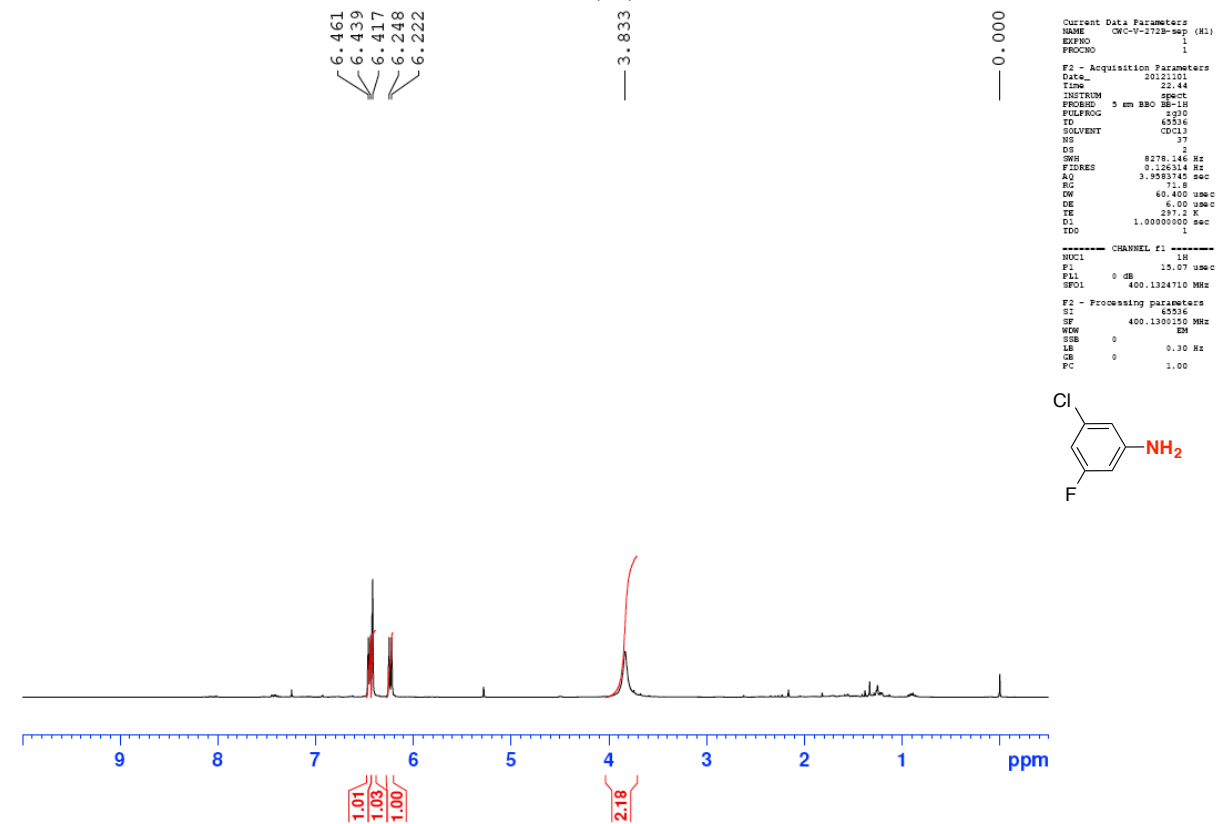

```

Current Data Parameters
NAME      CWC-V-2728-map (K1)
EXPNO    1
PROCNO   1

F2 - Acquisition Parameters
Date_    20121101
Time     22.44
INSTRUM  spect
PROBHD   5 mm BBO BB-1H
PULPROG  zg30
TD        65536
SOLVENT  CDCl3
NS        37
DS        2
SWH       8276.146 Hz
FIDRES   0.126314 Hz
AQ        3.9583740 sec
RG        71.8
DW        60.400 usec
DE        6.00 usec
TE        297.2 K
D1        1.00000000 sec
TD0       1

----- CHANNEL f1 -----
NUC1      1H
P1        15.07 usec
PL1       0 dB
SFO1      400.1324710 MHz

F2 - Processing parameters
SI         65536
SF         400.1300120 MHz
WDW        EM
SSB        0
LB         0.30 Hz
GB         0
PC         1.00
    
```

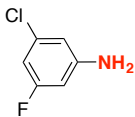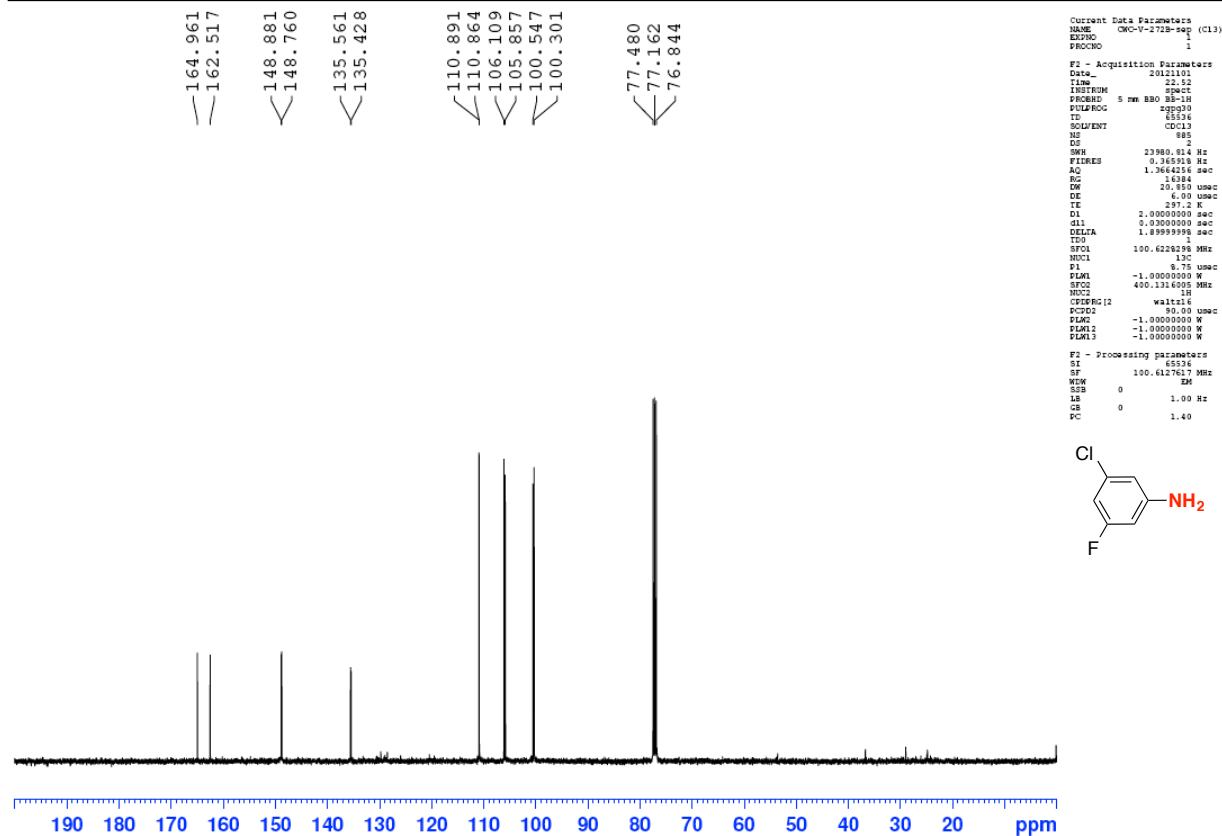

```

Current Data Parameters
NAME      CWC-V-2728-map (C13)
EXPNO    1
PROCNO   1

F2 - Acquisition Parameters
Date_    20121101
Time     22.52
INSTRUM  spect
PROBHD   5 mm BBO BB-1H
PULPROG  zgpg30
TD        65536
SOLVENT  CDCl3
NS        885
DS        2
SWH       23980.614 Hz
FIDRES   0.365916 Hz
AQ        1.3664256 sec
RG        14384
DW        19.800 usec
DE        6.00 usec
TE        297.2 K
D1        2.00000000 sec
d11       0.00000000 sec
DELTA    1.89999999 sec
TD0       1
SFO1      100.6282298 MHz
NUC1      13C
P1        9.75 usec
PL1       -1.00000000 W
SFO2      400.1314505 MHz
NUC2      1H
PCPRG12  waltz16
PCPD2    90.00 usec
PLM1     -1.00000000 W
PLM2     -1.00000000 W
PLM3     -1.00000000 W

F2 - Processing parameters
SI         65536
SF         100.6127617 MHz
WDW        EM
SSB        0
LB         1.00 Hz
GB         0
PC         1.40
    
```

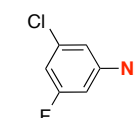

<sup>1</sup>H and <sup>13</sup>C NMR of 2-Fluorobenzene-1,4-diamine (4t)

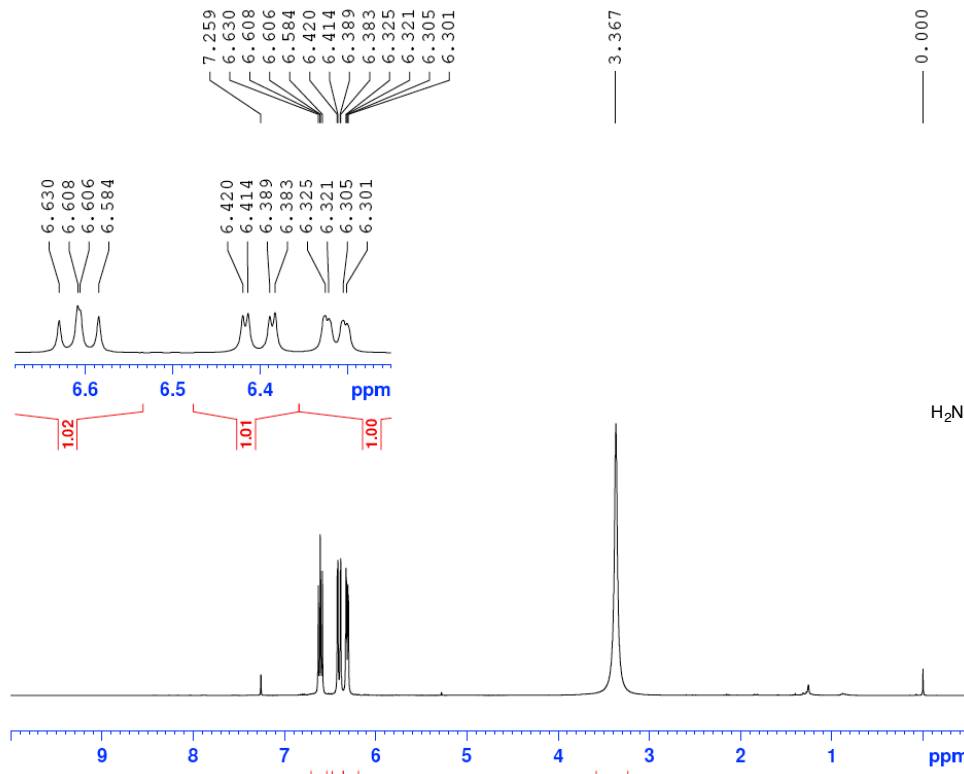

```

Current Data Parameters
NAME  CQCW-178a-seg (1H)
EXPNO  1
PROCNO  1
F2 - Acquisition Parameters
Date_  20120918
Time  15.21
INSTRUM  spect
PROBHD  5 mm BBO BB-1H
PULPROG  zg30
TD  65536
SOLVENT  CDCl3
NS  51
DS  2
SWH  8278.146 Hz
FIDRES  0.126314 Hz
AQ  3.9284243 sec
RG  37
SFO  400.136050 MHz
DE  60.460 usec
TE  297.2 K
D1  3.00000000 sec
TD0  1
----- CHANNEL f1 -----
NUC1  1H
P1  15.07 usec
PL1  0.00 dB
SFO1  400.136050 MHz
F2 - Processing parameters
SI  65536
SF  400.136050 MHz
WDW  EM
SSB  0
LB  0.10 Hz
GB  0
PC  1.00
    
```

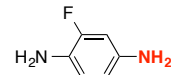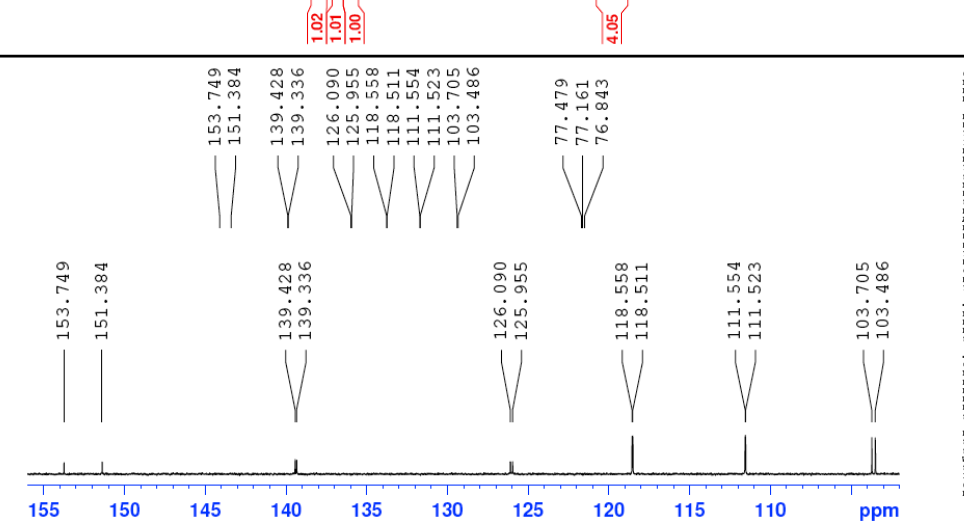

```

Current Data Parameters
NAME  CQCW-178a-seg (13C)
EXPNO  2
PROCNO  1
F2 - Acquisition Parameters
Date_  20120918
Time  19.37
INSTRUM  spect
PROBHD  5 mm BBO BB-1H
PULPROG  zgpg30
TD  65536
SOLVENT  CDCl3
NS  83
DS  2
SWH  23980.614 Hz
FIDRES  0.362918 Hz
AQ  1.3864756 sec
RG  12505.0
SFO  100.626129 MHz
DE  20.850 usec
TE  297.2 K
D1  2.00000000 sec
d11  0.03000000 sec
DELTA  1.89999999 sec
TD0  1
----- CHANNEL f1 -----
NUC1  13C
P1  8.75 usec
PL1  -0.00 dB
SFO1  100.626129 MHz
----- CHANNEL f2 -----
CPDPRG2  Waltz16
NUC2  1H
PCPD2  90.00 usec
PL2  -1.00 dB
PL12  14.50 dB
PL13  14.00 dB
SFO2  400.136050 MHz
F2 - Processing parameters
SI  65536
SF  100.626129 MHz
WDW  EM
SSB  0
LB  1.00 Hz
GB  0
PC  1.40
    
```

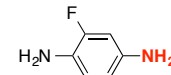



<sup>1</sup>H and <sup>13</sup>C NMR of 4-Chloro-3-(trifluoromethyl)aniline (**4u**)

7.250  
7.215  
7.194  
6.940  
6.934  
6.715  
6.709  
6.694  
6.688

3.841

0.000

```
Current Data Parameters
NAME CWC-V-238B-sap (M1)
EXPNO 1
PROCNO 1
F2 - Acquisition Parameters
Date_ 20121026
Time 22.45
INSTRUM spect
PROBHD 5 mm BBO BB-1H
PULPROG zg30
TD 65536
SOLVENT CDCl3
NS 2
DS 2
SWH 8278.146 Hz
FIDRES 0.282314 Hz
AQ 3.9584243 sec
RG 45.3
DM 60.400 usec
DE 6.00 usec
TE 297.2 K
D1 1.00000000 sec
TD0 1
===== CHANNEL f1 =====
NUC1 1H
P1 15.07 usec
PL1 0.00 dB
SFO1 400.1324710 MHz
F2 - Processing parameters
SI 65536
SF 400.1300139 MHz
WDW EM
SSB 0
LB 0.30 Hz
GB 0
PC 1.00
```

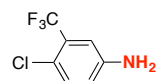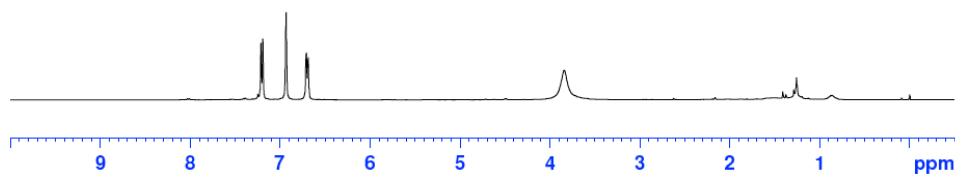

145.324  
132.165  
129.205  
128.898  
128.590  
128.283  
127.073  
124.357  
121.642  
120.253  
120.236  
120.219  
120.202  
118.927  
118.783  
113.792  
113.738  
113.684  
113.629  
113.629  
77.480  
77.162  
76.844

129.205  
128.898  
128.590  
128.283  
127.073  
124.357  
121.642  
120.253  
120.236  
120.219  
120.202  
118.927  
118.783  
113.792  
113.738  
113.684  
113.629

```
Current Data Parameters
NAME CWC-V-238B-sap (C13)
EXPNO 1
PROCNO 1
F2 - Acquisition Parameters
Date_ 20121026
Time 22.52
INSTRUM spect
PROBHD 5 mm BBO BB-1H
PULPROG zgpg30
TD 65536
SOLVENT CDCl3
NS 2
DS 2
SWH 23980.814 Hz
FIDRES 0.262918 Hz
AQ 1.3664706 sec
RG 18390.4
DM 20.800 usec
DE 6.00 usec
TE 297.2 K
D1 2.00000000 sec
d11 0.03000000 sec
DELTA 1.89999998 sec
TD0 1
===== CHANNEL F1 =====
NUC1 13C
P1 8.75 usec
PL1 -3.00 dB
SFO1 100.6228298 MHz
===== CHANNEL F2 =====
CPDPRG2 waltz16
NUC2 1H
PCPD2 90.00 usec
PL2 -1.00 dB
PL12 14.02 dB
PL13 18.00 dB
SFO2 400.1316005 MHz
F2 - Processing parameters
SI 65536
SF 100.6127596 MHz
WDW EM
SSB 0
LB 1.00 Hz
GB 0
PC 1.40
```

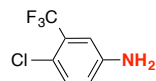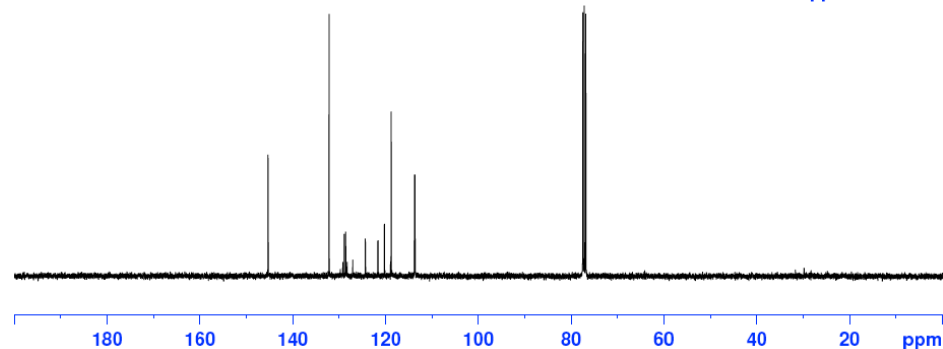

<sup>1</sup>H and <sup>13</sup>C NMR of 2-Chlorobenzene-1,4-diamine (4v)

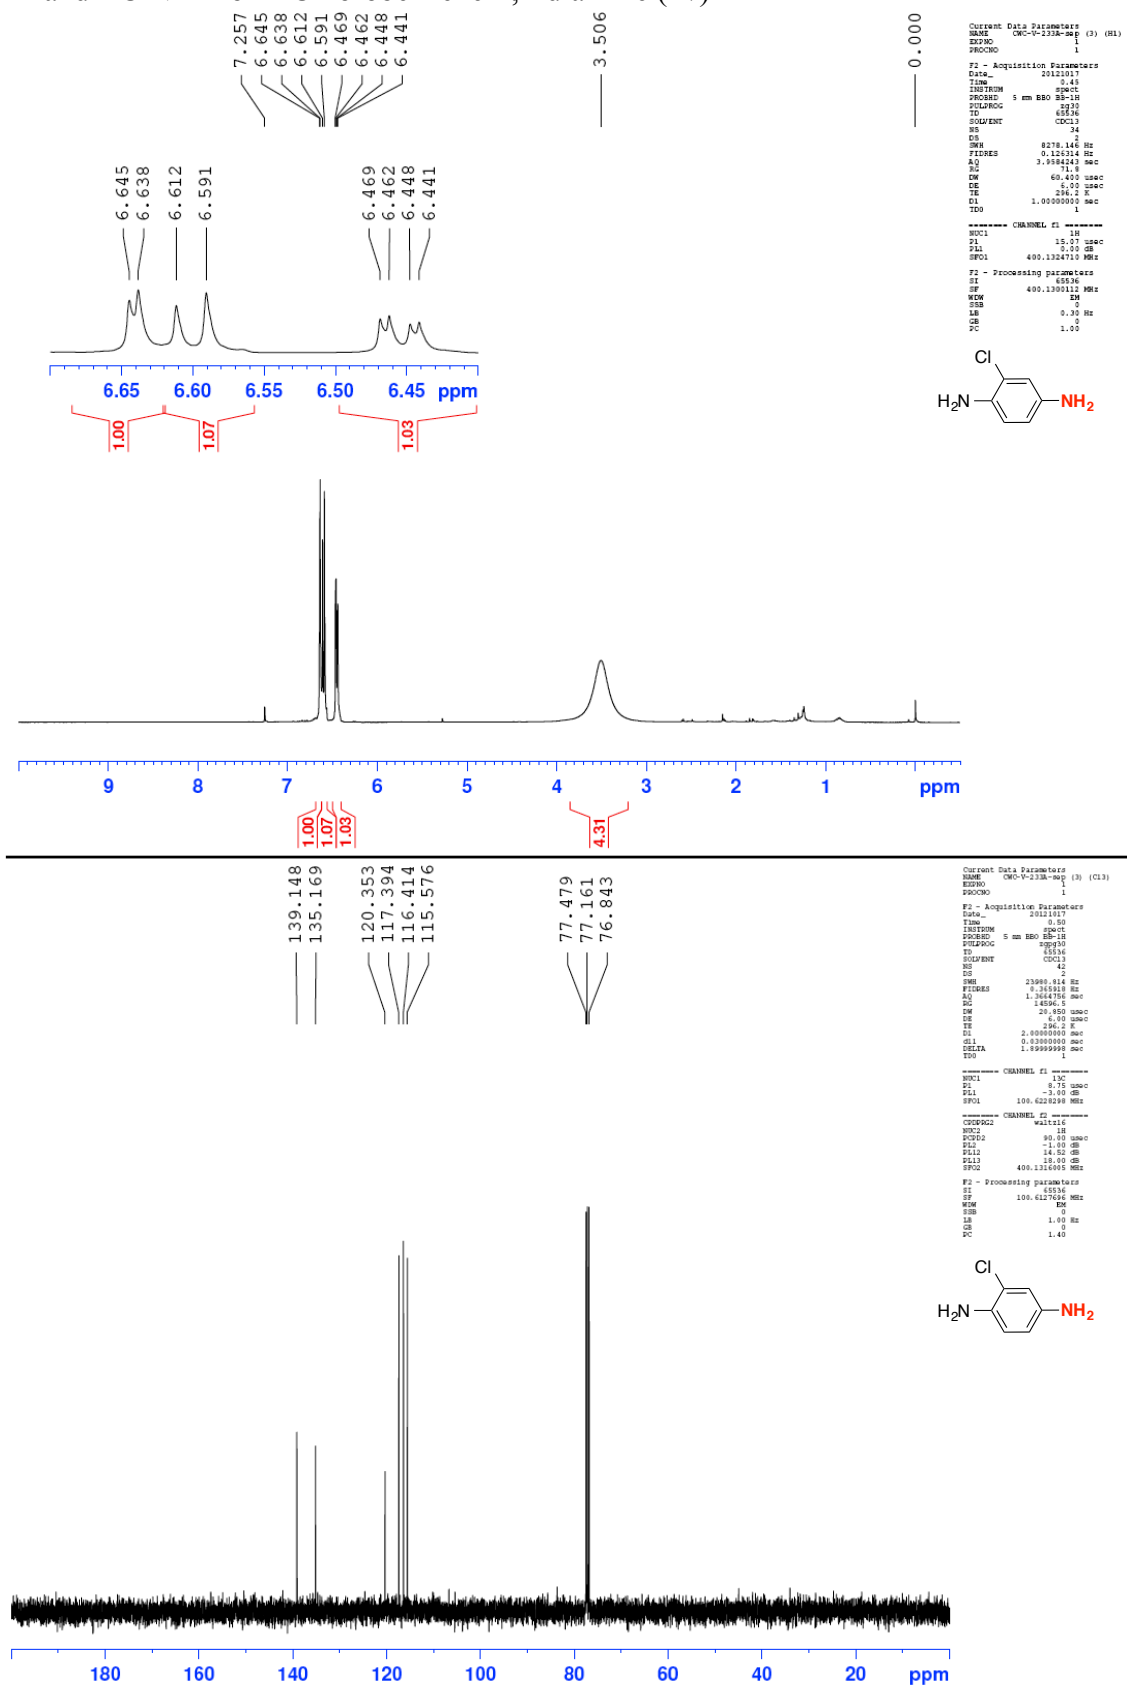

<sup>1</sup>H and <sup>13</sup>C NMR of 5-Methoxybenzene-1,3-diamine (4w)

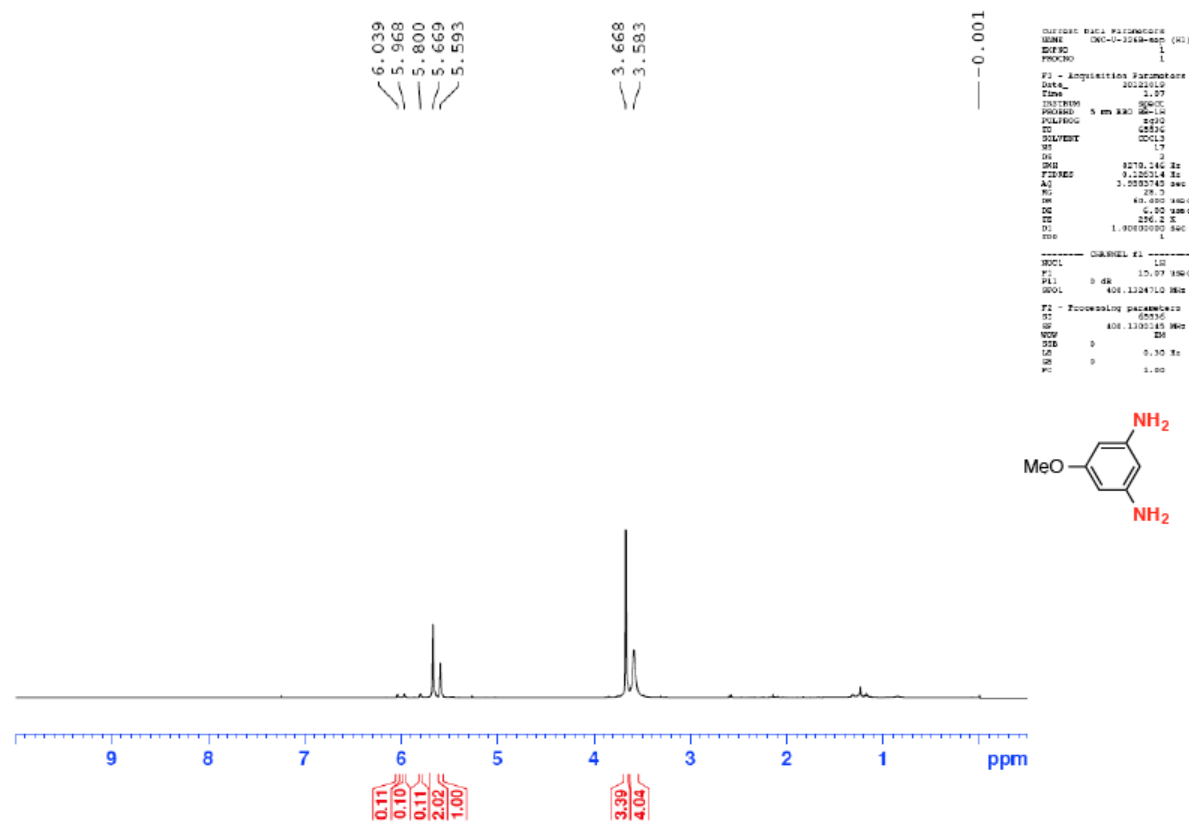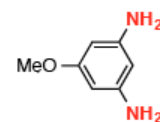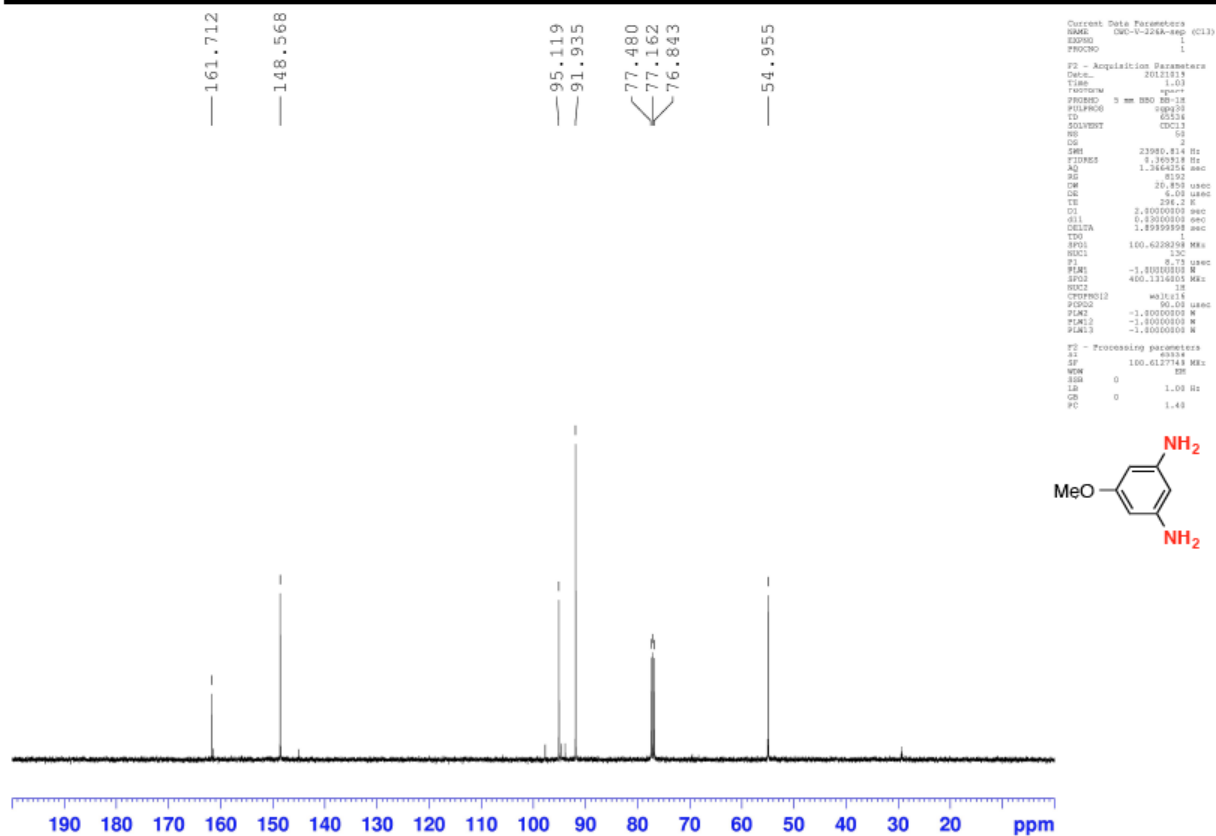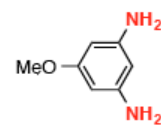

<sup>1</sup>H and <sup>13</sup>C NMR of 3-Amino-5-methoxypyridine (**5a**)

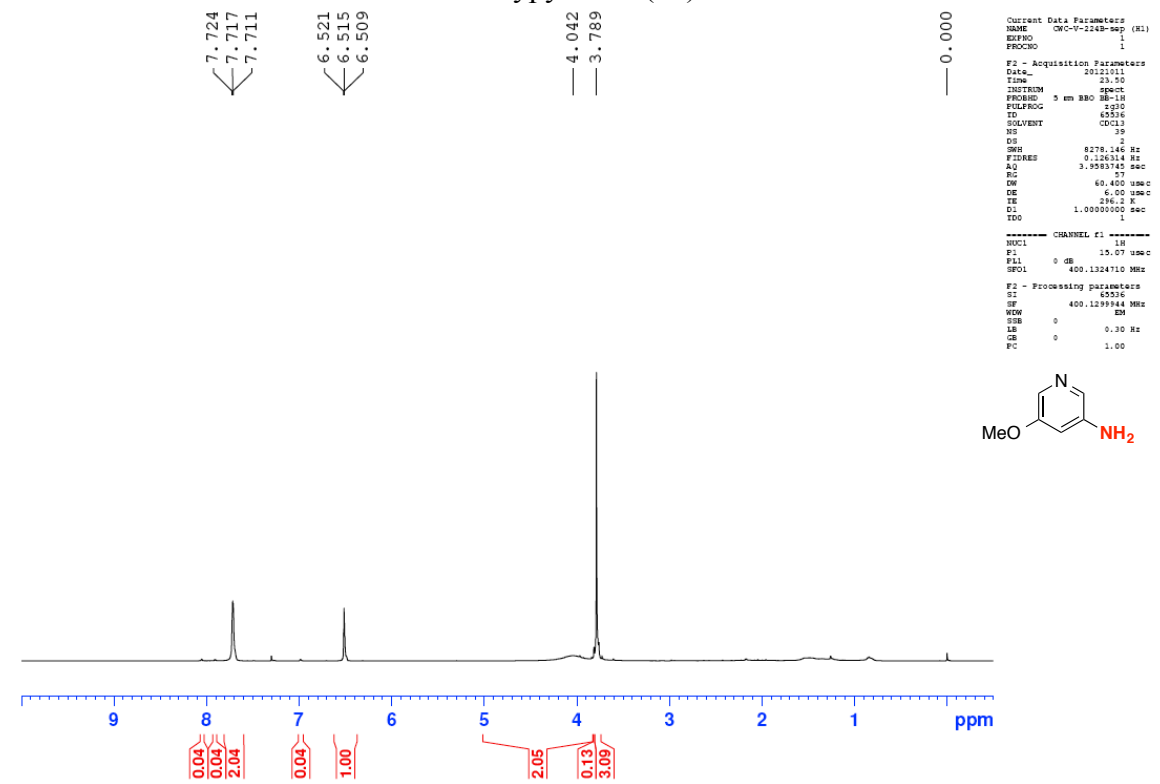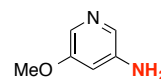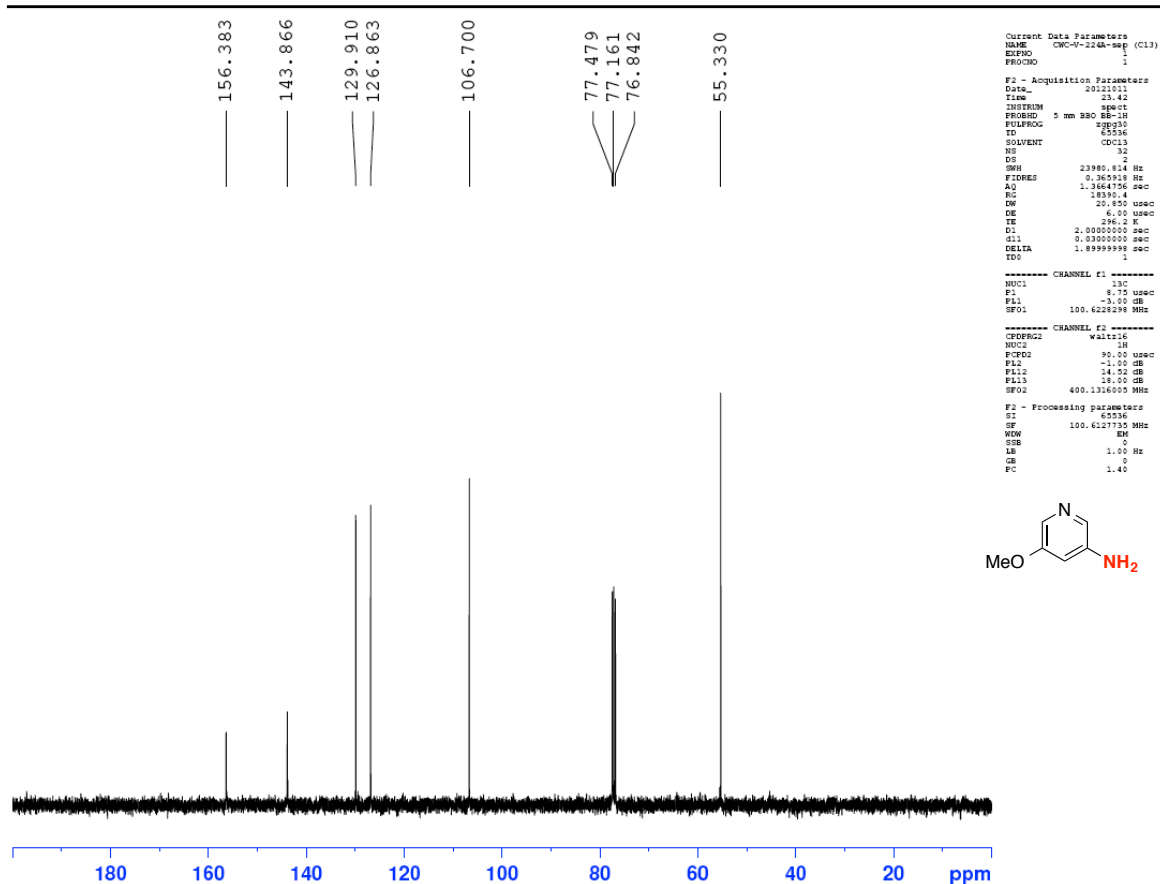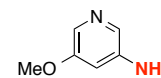

<sup>1</sup>H and <sup>13</sup>C NMR of 3-Amino-5-(trifluoromethyl)pyridine (**5b**)

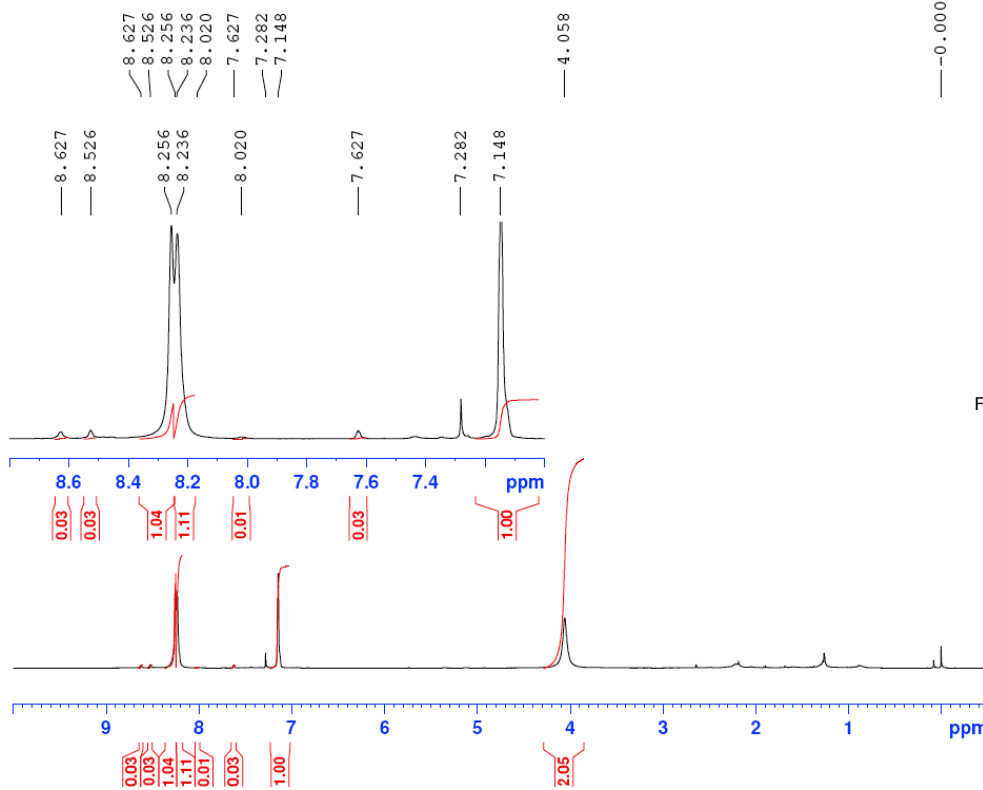

```

Current Data Parameters
NAME      CMC-9-2188-sep (2) (R1)
EXPNO    1
PROCNO   1
F2 - Acquisition Parameters
Date_    20121015
Time     17.05
INSTRUM spect
PROBHD   5 mm BBO BB-1H
PULPROG zgpg30
TD        65536
SOLVENT  CDCl3
NS        32
DS        2
SWH       8376.144 Hz
FIDRES   0.120264 Hz
AQ        3.9592745 sec
RG         184
WDW       EM
SSB       0
LB        0.80 usec
TE        298.2 K
D1        1.0000000 sec
DELTA    1
===== CHANNEL f1 =====
NUC1      1H
P1        15.07 usec
PL1       0 dB
SFO1     400.1324710 MHz
F2 - Processing parameters
SI        65536
SF        400.1300111 MHz
WDW       EM
SSB       0
LB        0.30 Hz
GB        0
CE        0
PC        1.00
    
```

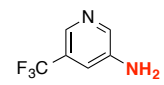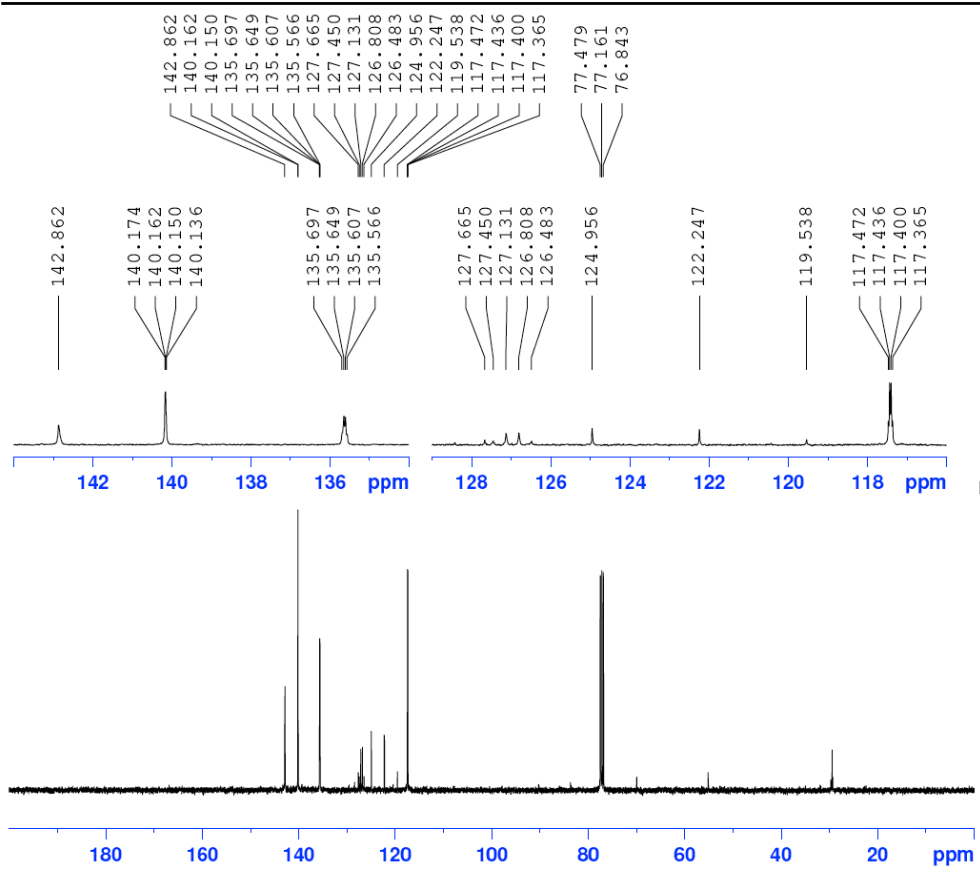

```

Current Data Parameters
NAME      CMC-9-2188-sep (2) (C13)
EXPNO    1
PROCNO   1
F2 - Acquisition Parameters
Date_    20121015
Time     17.34
INSTRUM spect
PROBHD   5 mm BBO BB-1H
PULPROG zgpg30
TD        65536
SOLVENT  CDCl3
NS        320
DS        2
SWH       13980.812 Hz
FIDRES   0.345918 Hz
AQ        1.3648756 sec
RG         8192
WDW       EM
SSB       0
LB        20.850 usec
TE        298.2 K
D1        2.0000000 sec
DELTA    0.3300000 sec
===== CHANNEL f1 =====
NUC1      13C
P1        8.75 usec
PL1       -3.00 dB
SFO1     100.6228198 MHz
===== CHANNEL f2 =====
NAME      waltz16
NUC2      1H
PCPRG2   waltz16
PL2      90.00 usec
PL3      -1.00 dB
PL4      14.00 dB
PL5      18.00 dB
SFO2     400.1316000 MHz
F2 - Processing parameters
SI        65536
SF        100.6187620 MHz
WDW       EM
SSB       0
LB        1.00 Hz
GB        0
CE        0
PC        1.40
    
```

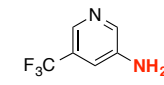

<sup>1</sup>H and <sup>13</sup>C NMR of 2-Amino-6-methoxypyridine (5c)

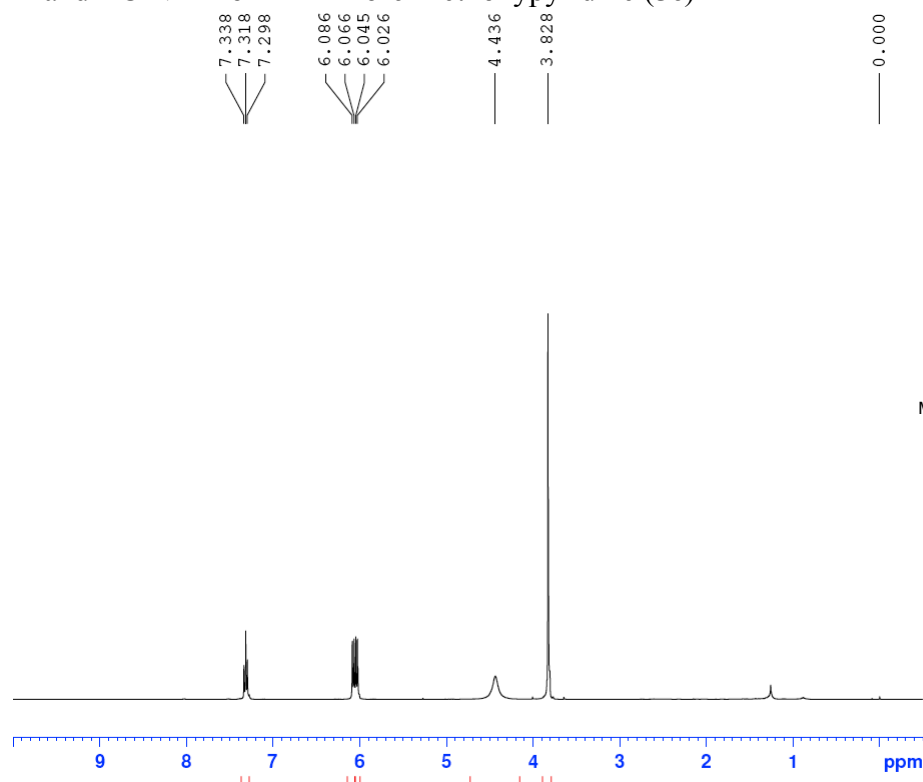

```

Current Data Parameters
NAME  CMC-V-216A-sep (H1)
EXPNO  1
PROCNO  1

F2 - Acquisition Parameters
Date_   20121007
Time    20.56
INSTRUM spect
PROBHD  5 mm BBO BB-1H
PULPROG zgpg30
TD       65536
SOLVENT CDCl3
NS       32
DS       2
SWE      8278.140 Hz
FIDRES  0.126314 Hz
AQ       3.9384243 sec
RG       351.9
DM       60.400 usec
DE       6.00 usec
TE       296.2 K
DELTA   1.00000000 sec
TD0      1

===== CHANNEL f1 =====
NUC1     1H
P1       15.07 usec
PL1      0.00 dB
SFO1     400.1324710 MHz

F2 - Processing parameters
SI       65536
SF       400.1300415 MHz
WDW      EM
SSB      0
LB       0.30 Hz
GB       0
PC       1.00
    
```

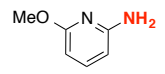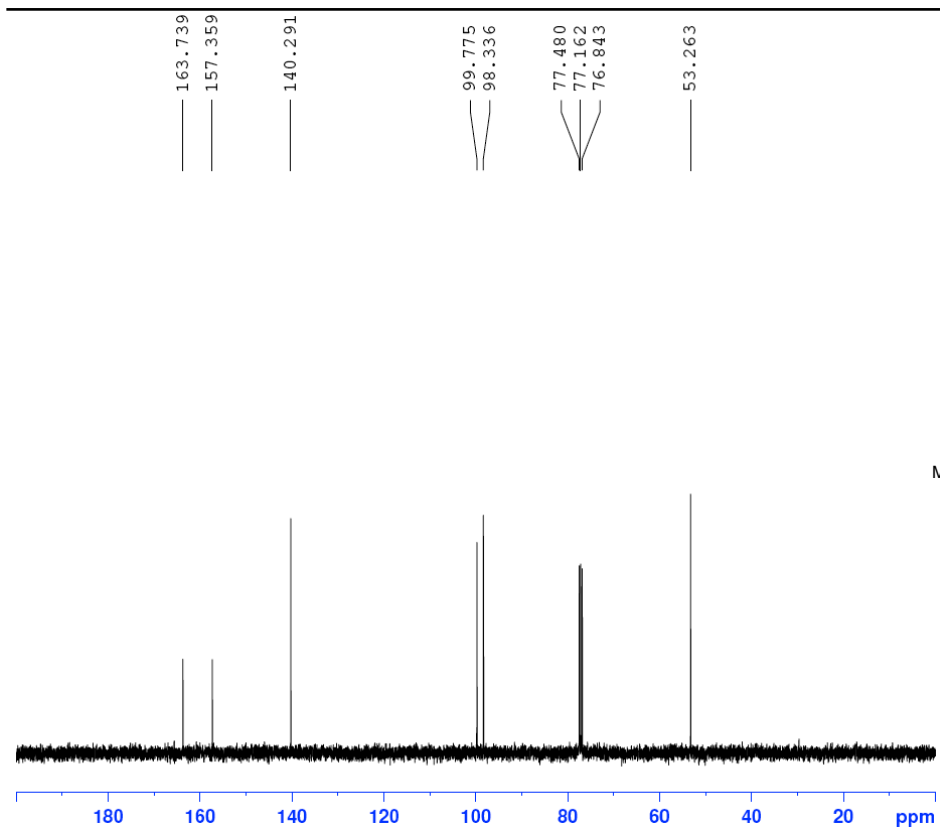

```

Current Data Parameters
NAME  CMC-V-216A-sep (C13)
EXPNO  1
PROCNO  1

F2 - Acquisition Parameters
Date_   20121007
Time    21.03
INSTRUM spect
PROBHD  5 mm BBO BB-1H
PULPROG zgpg30
TD       65536
SOLVENT CDCl3
NS       32
DS       2
SWE      23980.814 Hz
FIDRES  0.365918 Hz
AQ       1.3664706 sec
RG       2152
DM       20.500 usec
DE       6.00 usec
TE       296.2 K
DELTA   2.00000000 sec
S1       2.00000000 sec
S11      0.00000000 sec
DELTA   1.89999999 sec
TD0      1

===== CHANNEL f1 =====
NUC1     13C
P1       6.75 usec
PL1      -3.00 dB
SFO1     100.6228299 MHz

===== CHANNEL f2 =====
NUC2     1H
P2       90.00 usec
PL2      -1.00 dB
PL12     14.00 dB
PL13     18.00 dB
SFO2     400.1316058 MHz

F2 - Processing parameters
SI       65536
SF       100.6227702 MHz
WDW      EM
SSB      0
LB       1.00 Hz
GB       0
PC       1.40
    
```

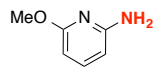

# <sup>1</sup>H and <sup>13</sup>C NMR of 2-Amino-5-methylpyridine (5d)

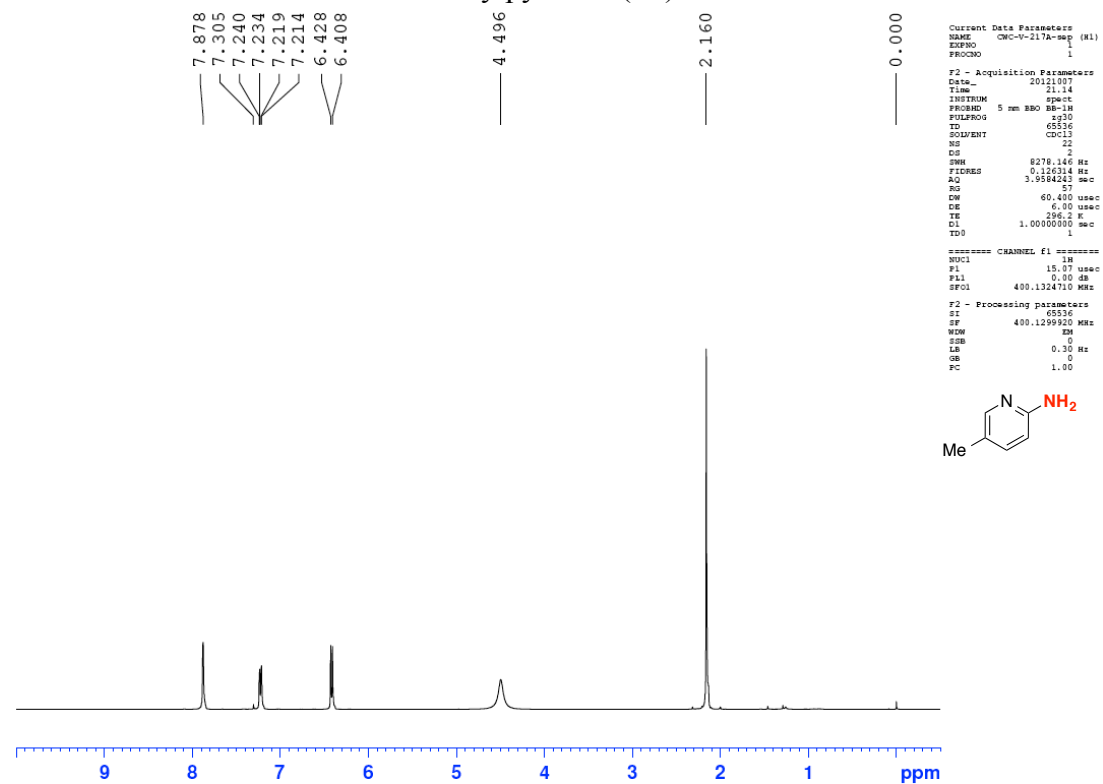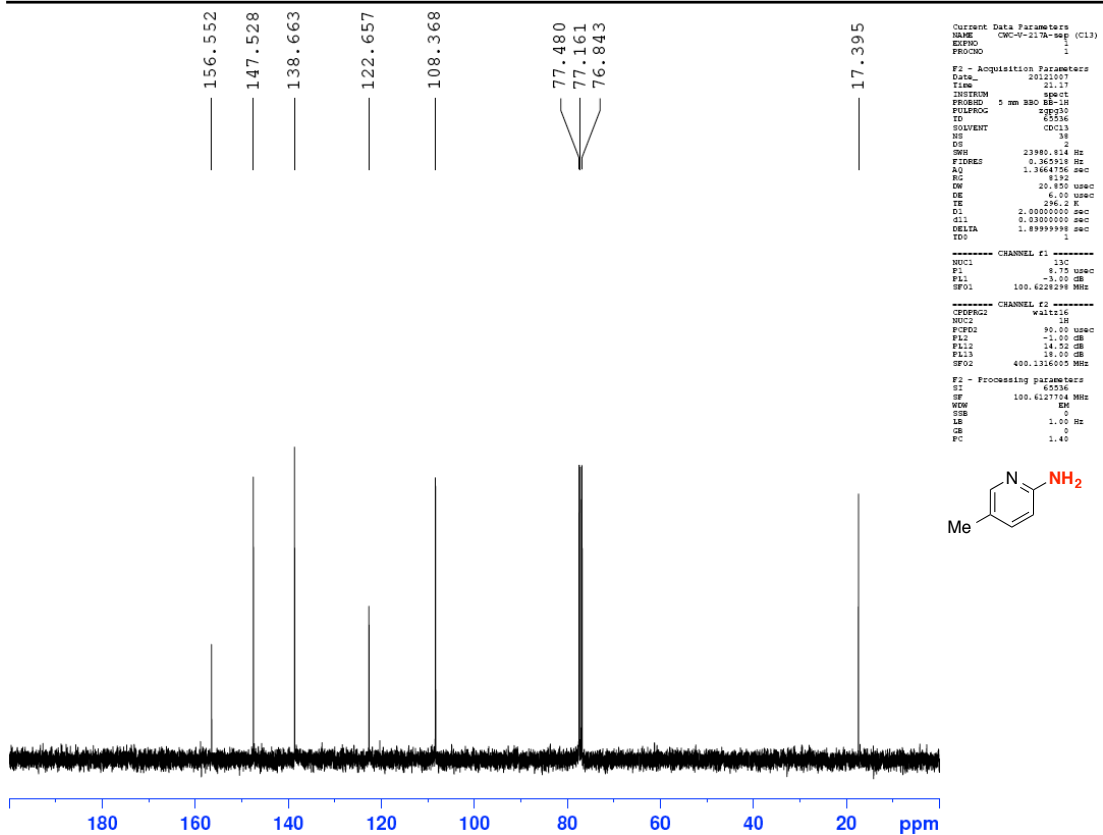

<sup>1</sup>H and <sup>13</sup>C NMR of *tert*-Butyl 6-aminonicotinate (**5e**)

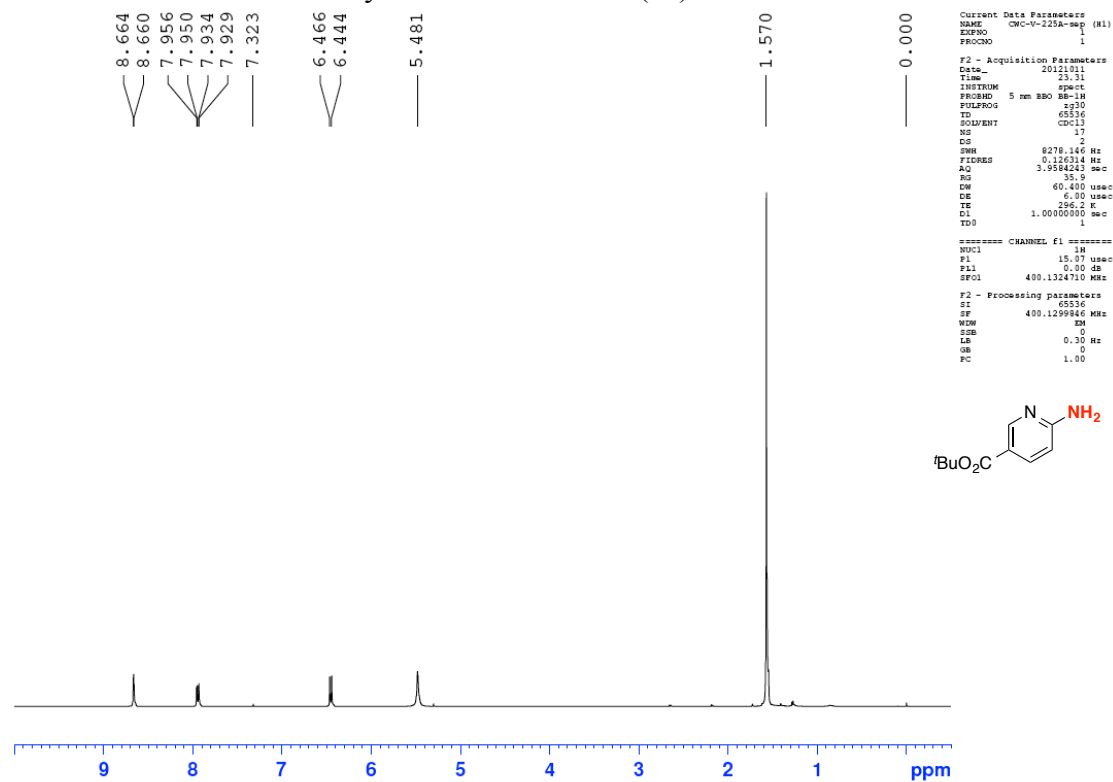

```

Current Data Parameters (M1)
NAME      CWC-V-225A-sep
EXPNO     1
PROCNO    1

F2 - Acquisition Parameters
Date_     20121011
Time      23.31
INSTRUM   spect
PROBHD    5 mm BBO BB-H
PULPROG   zg30
TD         65536
SOLVENT   CDCl3
NS         17
DS         2
SWH        8278.146 Hz
FIDRES     0.126314 Hz
AQ         3.9584243 sec
RG         38.9
CW         60.400 usec
DE         6.00 usec
TE         296.2 K
D1         1.00000000 sec
D11        1
TD0        1

===== CHANNEL f1 =====
NUC1       1H
P1         15.07 usec
PL1        0.30 dB
SFO1       400.1324710 MHz

F2 - Processing parameters
SI         65536
SF         400.1299846 MHz
WDW        EM
SSB        0
LB         0.30 Hz
GB         0
PC         1.00
    
```

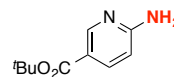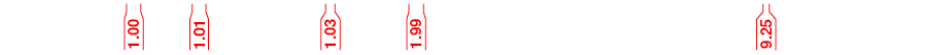

```

Current Data Parameters (C13)
NAME      CWC-V-225A-sep (C13)
EXPNO     1
PROCNO    1

F2 - Acquisition Parameters
Date_     20121011
Time      23.34
INSTRUM   spect
PROBHD    5 mm BBO BB-H
PULPROG   zgpg30
TD         65536
SOLVENT   CDCl3
NS         36
DS         2
SWH        23980.814 Hz
FIDRES     0.362918 Hz
AQ         1.3684756 sec
RG         13904
CW         20.800 usec
DE         6.00 usec
TE         296.2 K
D1         2.00000000 sec
D11        0.03000000 sec
DELTA     1.89999998 sec
TD0        1

===== CHANNEL f1 =====
NUC1       13C
P1         8.75 usec
PL1        -1.00 dB
SFO1       100.6228298 MHz

===== CHANNEL f2 =====
CPDPRG2   waltz16
NUC2       1H
P2         90.00 usec
PL2        -1.00 dB
PL12       18.00 dB
PL13       18.00 dB
SFO2       400.1316000 MHz

F2 - Processing parameters
SI         65536
SF         100.6127670 MHz
WDW        EM
SSB        0
LB         1.00 Hz
GB         0
PC         1.40
    
```

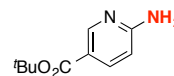



<sup>1</sup>H and <sup>13</sup>C NMR of 6-Methylpyridine-2,3-diamine (**5f**)

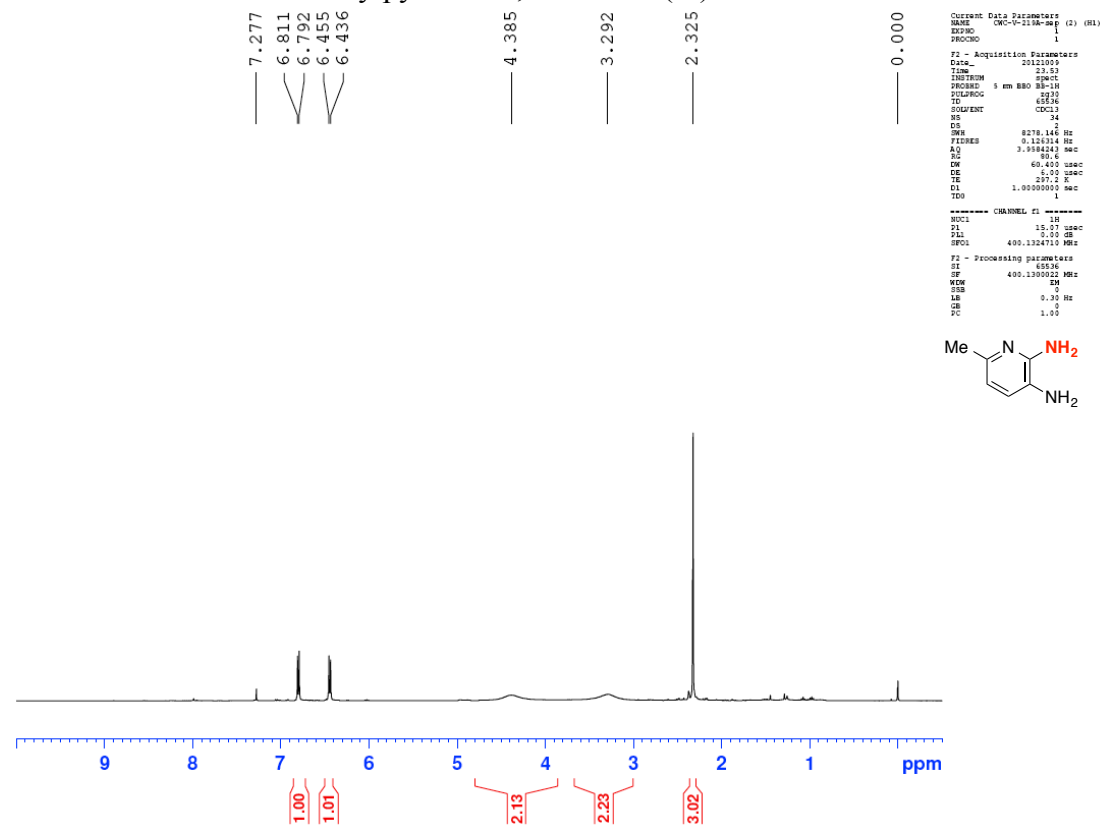

```

Current Data Parameters
NAME CMC-V-218A-seg (2) (H1)
EXPNO 1
PROCNO 1
F2 - Acquisition Parameters
Date_ 20121019
Time 23.53
INSTRUM spect
PROBHD 5 mm BBO BB-1H
PULPROG zgpg30
TD 65536
SOLVENT CDCl3
SOLVENT CDCl3
DS 34
SWH 8278.146 Hz
FIDRES 0.120314 Hz
AQ 3.9584243 sec
RG 80.6
DM 60.400 usec
DE 1.500 usec
TE 300.2 K
EL 1.00000000 sec
TD0 1
----- CHANNEL f1 -----
NUC1 1H
P1 15.01 usec
PL1 0.00 dB
SFO1 400.1324710 MHz
F2 - Processing parameters
SI 65536
SF 400.1330022 MHz
WDW EM
SSB 0
LB 0.30 Hz
GB 0
CB 1.00
  
```

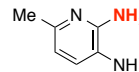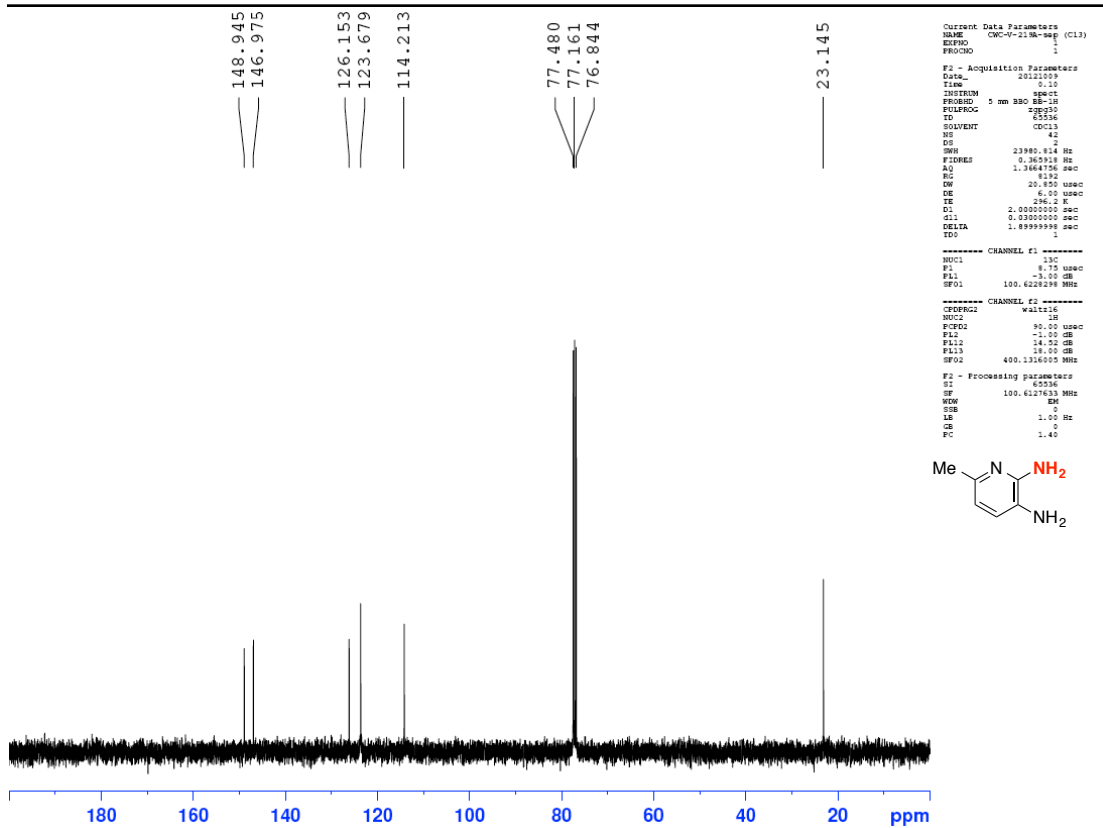

```

Current Data Parameters
NAME CMC-V-218A-seg (13)
EXPNO 1
PROCNO 1
F2 - Acquisition Parameters
Date_ 20121019
Time 0.10
INSTRUM spect
PROBHD 5 mm BBO BB-1H
PULPROG zgpg30
TD 65536
SOLVENT CDCl3
SOLVENT CDCl3
DS 42
SWH 23980.814 Hz
FIDRES 0.360518 Hz
AQ 1.3464756 sec
RG 81.92
DM 20.800 usec
DE 6.00 usec
TE 300.2 K
EL 1.00000000 sec
G11 0.03000000 sec
DELTA 1.89999998 sec
TD0 1
----- CHANNEL f1 -----
NUC1 13C
P1 8.10 usec
PL1 -3.00 dB
SFO1 100.6218198 MHz
----- CHANNEL f2 -----
CPDPRG2 waltz16
NUC2 13C
P2 90.00 usec
PL2 -1.00 dB
PL12 14.52 dB
PL13 18.00 dB
SFO2 400.1316005 MHz
F2 - Processing parameters
SI 65536
SF 100.6127633 MHz
WDW EM
SSB 0
LB 1.00 Hz
GB 0
CB 1.40
  
```

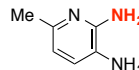

# <sup>1</sup>H and <sup>13</sup>C NMR of 2-Aminoquinoline (5g)

7.799  
7.777  
7.667  
7.646  
7.579  
7.559  
7.537  
7.519  
7.517  
7.499  
7.237  
7.217  
7.200  
6.661  
6.639  
— 5.298

— 0.000

```

Current Data Parameters
NAME      CWC-V-181A-sep (H1)
EXPNO    1
PROCNO   1

F2 - Acquisition Parameters
Date_    20120925
Time     16.07
INSTRUM  spect
PROBHD   5 mm BBO MM-1H
PULPROG  zg30
TD        65536
SOLVENT  CDCl3
NS        32
DS        2
SWH       8278.146 Hz
FIDRES   0.120316 Hz
AQ        3.9583743 sec
RG        65.5
DW        60.400 usec
DE        6.00 usec
TE        296.2 K
D1        1.00000000 sec
TD0       1

===== CHANNEL f1 =====
NUC1      1H
P1        15.07 usec
PL1       0 dB
SFO1      400.1324710 MHz

F2 - Processing parameters
SI        65536
SF        400.1330122 MHz
WDW       EM
SSB       0
LB        0.30 Hz
GB        0
PC        1.00
    
```

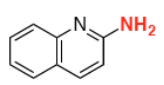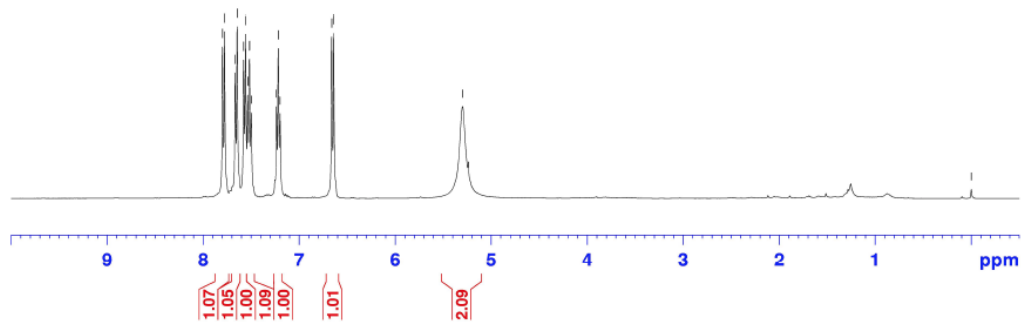

157.328  
147.560  
138.048  
129.733  
127.542  
125.677  
123.521  
122.540  
111.908

77.478  
77.160  
76.841

```

Current Data Parameters
NAME      CWC-V-181A-sep (13C)
EXPNO    1
PROCNO   1

F2 - Acquisition Parameters
Date_    20120925
Time     16.42
INSTRUM  spect
PROBHD   5 mm BBO MM-1H
PULPROG  zgpg30
TD        65536
SOLVENT  CDCl3
NS        60
DS        2
SWH       23080.814 Hz
FIDRES   0.365918 Hz
AQ        1.3664208 sec
RG        18386.4
DW        20.850 usec
DE        6.00 usec
TE        296.2 K
D1        2.00000000 sec
D11       0.03000000 sec
DELTA    1.89999998 sec
TDO       100.6228298 MHz
SFO1      100.6228298 MHz
NUC1      13C
P1        8.75 usec
PL1       -1.00000000 dB
SFO2      400.1318065 MHz
MUC3     walfr14
CPOPC12  walfr14
PCPD2    90.00 usec
PLA2     -1.00000000 dB
PLM1     -1.00000000 dB
PLM3     -1.00000000 dB

F2 - Processing parameters
SI        65536
SF        100.6127720 MHz
WDW       EM
SSB       0
LB        1.00 Hz
GB        0
PC        1.40
    
```

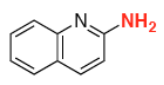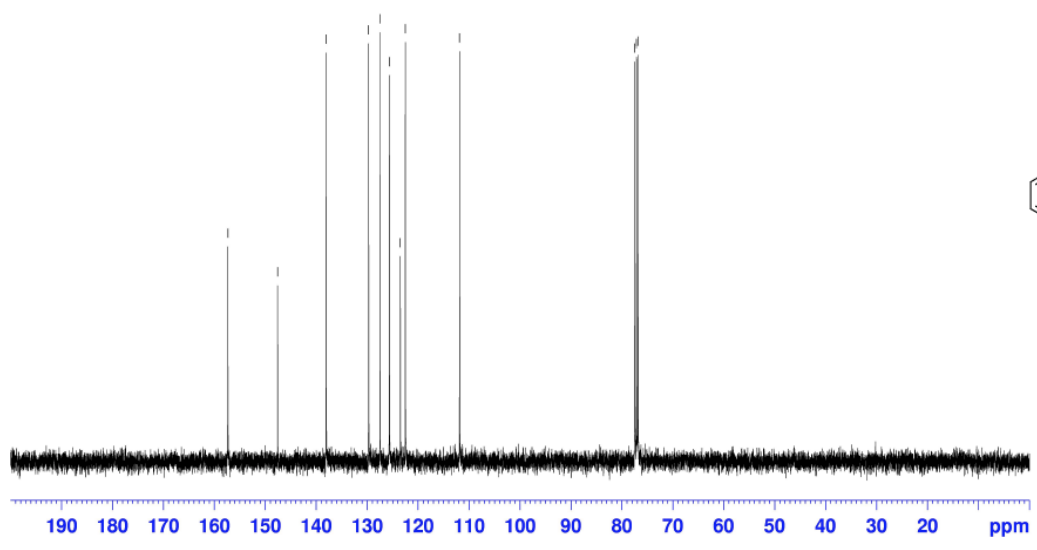

# <sup>1</sup>H and <sup>13</sup>C NMR of 3-Aminoquinoline (5h)

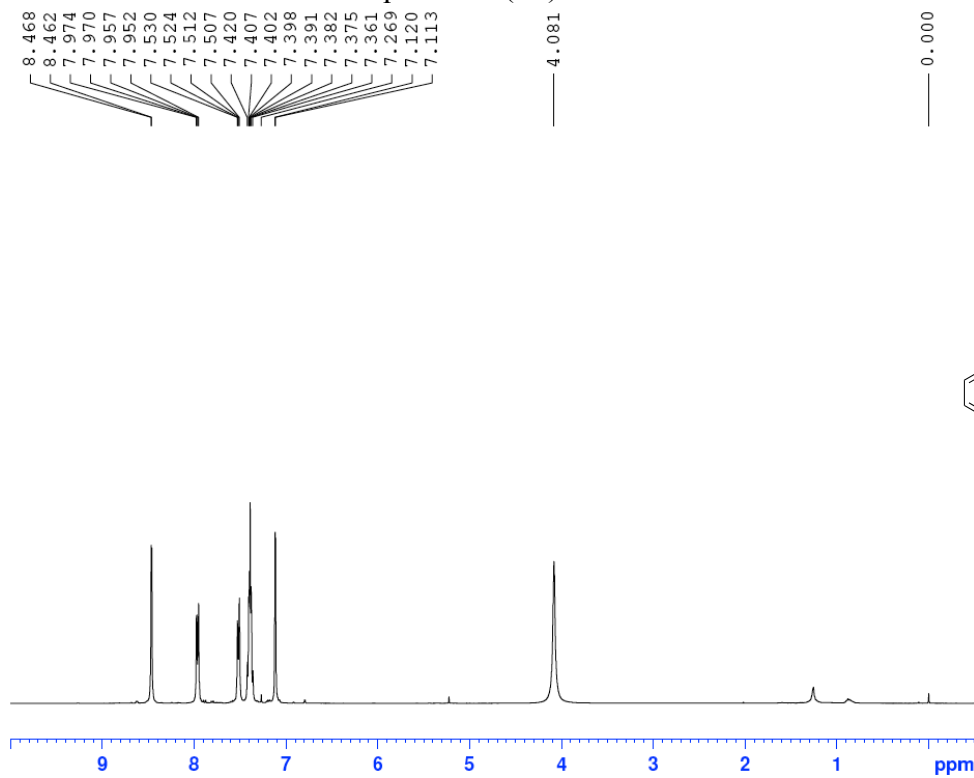

```

Current Data Parameters
NAME CWC-V-1804-sep (1H)
EXPNO 1
PROCNO 1
F2 - Acquisition Parameters
Date_ 20120919
Time 0.26
INSTRUM spect
PROBHD 5 mm BBO BB-1H
PULPROG zgpg30
TE 300.2
SOLVENT CDCl3
NS 16
DS 4
SWH 8278.142 Hz
FIDRES 0.126314 Hz
AQ 3.9084243 sec
RG 32.9
SF 400.1300000 MHz
DE 6.00 usec
TE 297.2 K
D1 1.90000000 sec
TD0 1
----- CHANNEL f1 -----
NUC1 1H
P1 13.00 usec
PL1 0.00 dB
SFO1 400.1324710 MHz
F2 - Processing parameters
SI 65536
SF 400.1300000 MHz
WDW EM
SSB 0
LB 0.30 Hz
GB 0
PC 1.00
  
```

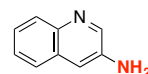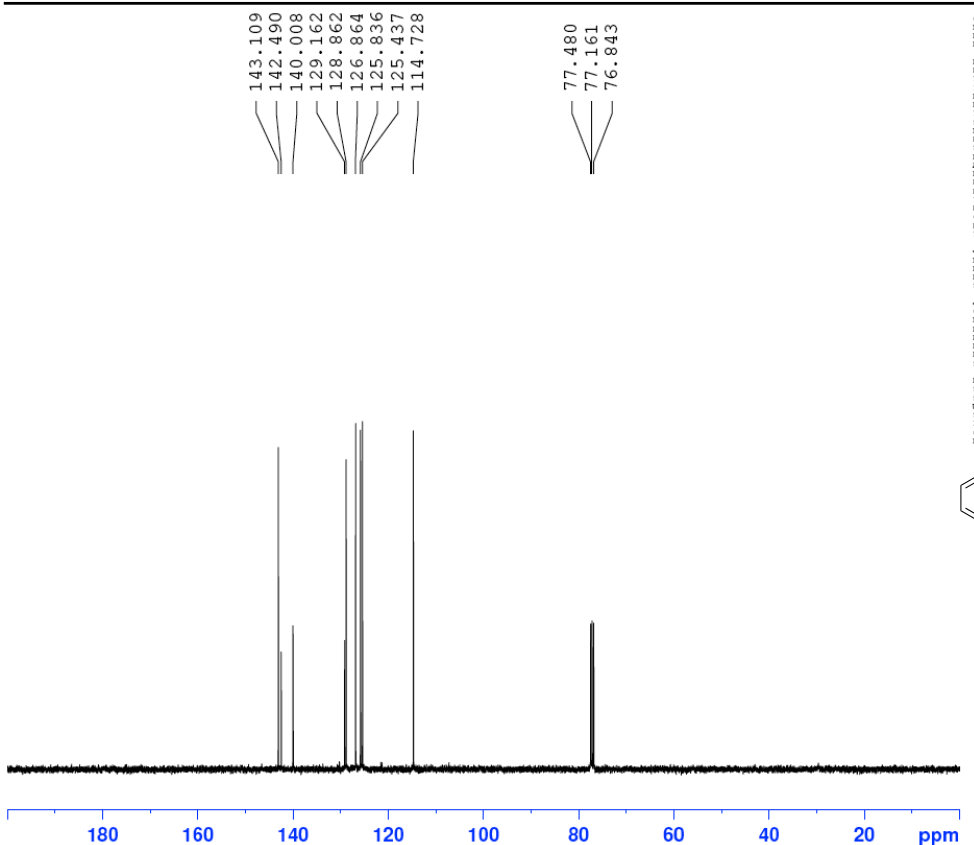

```

Current Data Parameters
NAME CWC-V-1804-sep (13C)
EXPNO 1
PROCNO 1
F2 - Acquisition Parameters
Date_ 20120919
Time 1.00
INSTRUM spect
PROBHD 5 mm BBO BB-1H
PULPROG zgpg30
TE 300.2
SOLVENT CDCl3
NS 64
DS 4
SWH 23980.614 Hz
FIDRES 0.365918 Hz
AQ 1.3664756 sec
RG 5752.6
SF 100.6261250 MHz
DE 6.00 usec
TE 297.2 K
D1 2.03000000 sec
G11 0.03000000 sec
DELTA 1.89999999 sec
TD0 1
----- CHANNEL f1 -----
NUC1 13C
P1 8.75 usec
PL1 -3.00 dB
SFO1 100.6261250 MHz
----- CHANNEL f2 -----
CPDPRG2 Waltz16
NUC2 1H
PCPD2 90.00 usec
PL2 -1.00 dB
PL12 14.00 dB
PL13 15.00 dB
SFO2 400.1316000 MHz
F2 - Processing parameters
SI 65536
SF 100.6261250 MHz
WDW EM
SSB 0
LB 1.00 Hz
GB 0
PC 1.40
  
```

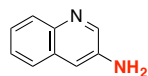

# <sup>1</sup>H and <sup>13</sup>C NMR of 6-Aminoquinoline (5i)

8.630  
8.622  
7.902  
7.880  
7.822  
7.802  
7.218  
7.208  
7.198  
7.188  
7.113  
7.109  
7.091  
7.087  
6.809

4.125

0.000

```
Current Data Parameters
NAME CWC-V-194B-sep (d1a)d (H1)
EXPNO 1
PROCNO 1
F2 - Acquisition Parameters
Date_ 20121004
Time 15.50
INSTRUM spect
PROBHD 5 mm BBO BB-1H
PULPROG zgpg30
TD 65536
SOLVENT CDCl3
NS 2
DS 2
SWH 8238.144 Hz
FIDRES 0.122514 Hz
AQ 3.958823 sec
RG 655
DE 20.850 usec
TE 298.2 K
D1 2.0000000 sec
DELTA 1.8999998 sec
TD0 1
```

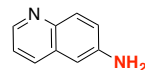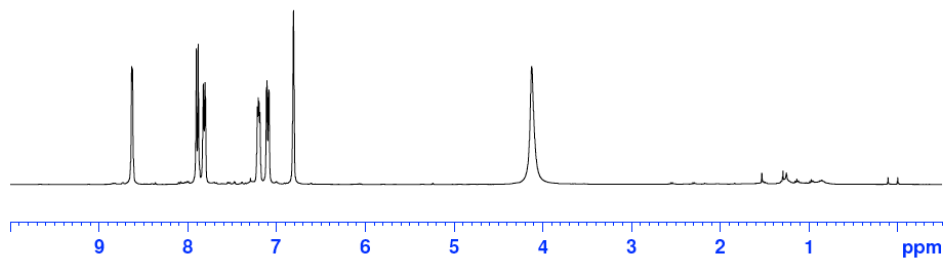

1.00  
1.06  
1.11  
1.10  
1.14  
1.12

2.30

146.532  
144.848  
143.187  
133.701  
130.242  
129.737  
121.581  
121.285

107.185

77.481  
77.162  
76.843

```
Current Data Parameters
NAME CWC-V-194B-sep (C13)
EXPNO 1
PROCNO 1
F2 - Acquisition Parameters
Date_ 20121003
Time 15.59
INSTRUM spect
PROBHD 5 mm BBO BB-1H
PULPROG zgpg30
TD 65536
SOLVENT CDCl3
NS 40
DS 2
SWH 23980.814 Hz
FIDRES 0.365918 Hz
AQ 1.3684756 sec
RG 16384
DE 20.850 usec
TE 298.2 K
D1 2.0000000 sec
DELTA 0.0300000 sec
TD0 1
```

```
----- CHANNEL f1 -----
NUC1 13C
P1 8.75 usec
PL1 -3.00 dB
SFO1 100.6228298 MHz
```

```
----- CHANNEL f2 -----
CPDPRG2 waltz16
NUC2 1H
P2 90.00 usec
PL2 -1.00 dB
PL12 14.00 dB
PL13 18.00 dB
SFO2 400.1316005 MHz
```

```
F2 - Processing parameters
SI 65536
SF 100.6127782 MHz
WDW EM
SSB 0
LB 1.00 Hz
GB 0
PC 1.40
```

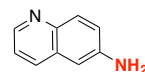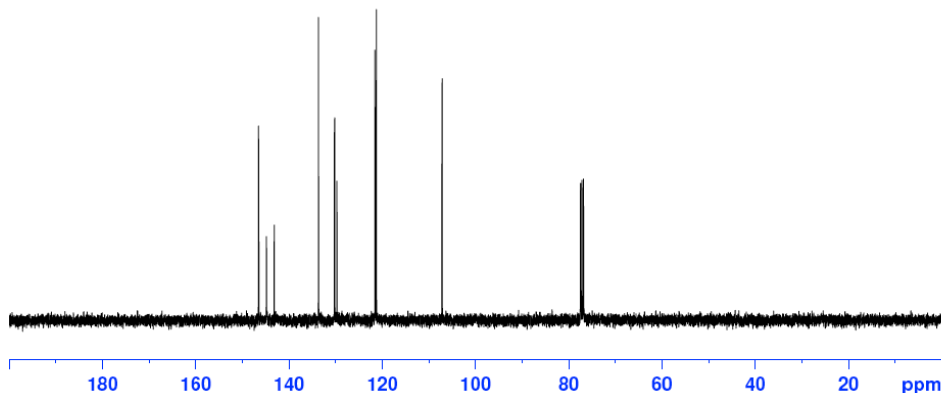

<sup>1</sup>H and <sup>13</sup>C NMR of 5-Aminobenzothiophene (5j)

7.594  
7.572  
7.333  
7.319  
7.176  
7.098  
7.084  
7.009  
7.004  
6.714  
6.709  
6.693  
6.688

3.619

0.000

```
Current Data Parameters
NAME      CWC-V-195A-sep (M1)
EXPNO    1
PROCNO   1

F2 - Acquisition Parameters
Date_    20120925
Time     10.39
INSTRUM  spect
PROBHD   5 mm BBO BB-1H
PULPROG  zg30
TD        65536
SOLVENT  CDCl3
DS        2
RG        409.2
SWH       8278.146 Hz
FIDRES   0.126314 Hz
AQ        3.9584243 sec
RG        409.2
DM        60.400 usec
DE        6.00 usec
TE        296.2 K
D1        1.00000000 sec
TD0

===== CHANNEL f1 =====
NUC1      1H
P1        15.07 usec
PL1       0.00 dB
SFO1      400.1324710 MHz

F2 - Processing parameters
SI        65536
SF        400.1300433 MHz
WDW       EM
SSB       0
LB        0.30 Hz
GB        0
PC        1.00
```

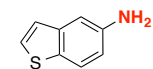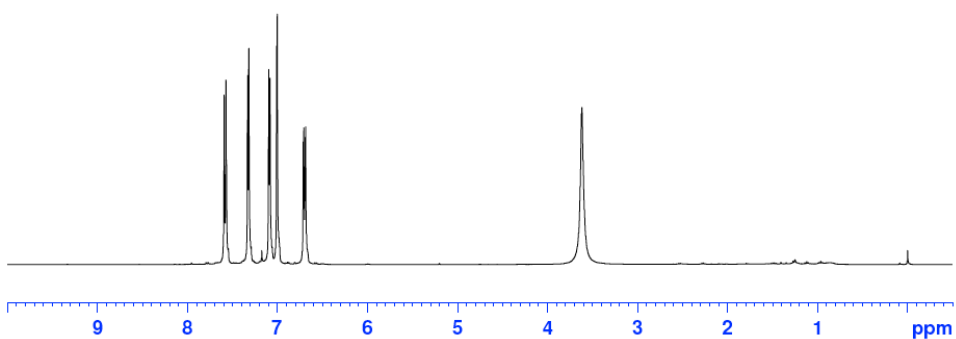

1.02  
1.03  
1.00  
1.02  
2.12

143.622  
140.887  
130.348  
127.112  
123.116  
122.965  
114.898  
108.298

77.479  
77.161  
76.843

```
Current Data Parameters
NAME      CWC-V-195A-sep (C13)
EXPNO    1
PROCNO   1

F2 - Acquisition Parameters
Date_    20120925
Time     14.42
INSTRUM  spect
PROBHD   5 mm BBO BB-1H
PULPROG  zgpg30
TD        65536
SOLVENT  CDCl3
DS        2
RG        409.2
SWH       23980.814 Hz
FIDRES   0.262018 Hz
AQ        1.3664796 sec
RG        7298.2
DM        20.850 usec
DE        6.00 usec
TE        296.2 K
D1        2.00000000 sec
d11      0.03000000 sec
DELTA    1.89999999 sec
TD0

===== CHANNEL f1 =====
NUC1      13C
P1        8.75 usec
PL1       -3.00 dB
SFO1      100.6228298 MHz

===== CHANNEL f2 =====
CPDPRG2  waltz16
NUC2      1H
PCPD2    90.00 usec
PL2      -1.00 dB
PL12     14.02 dB
PL13     14.02 dB
SFO2     400.1316005 MHz

F2 - Processing parameters
SI        65536
SF        100.6127771 MHz
WDW       EM
SSB       0
LB        1.00 Hz
GB        0
PC        1.40
```

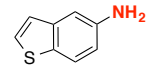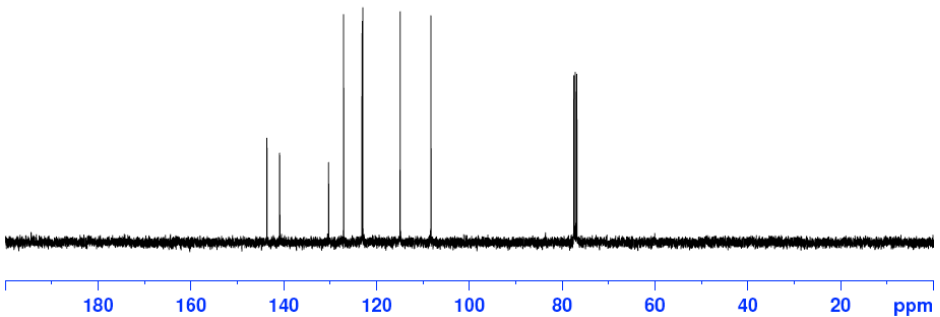

<sup>1</sup>H and <sup>13</sup>C NMR of 6-Amino-1-benzyl-1H-indole (5k)

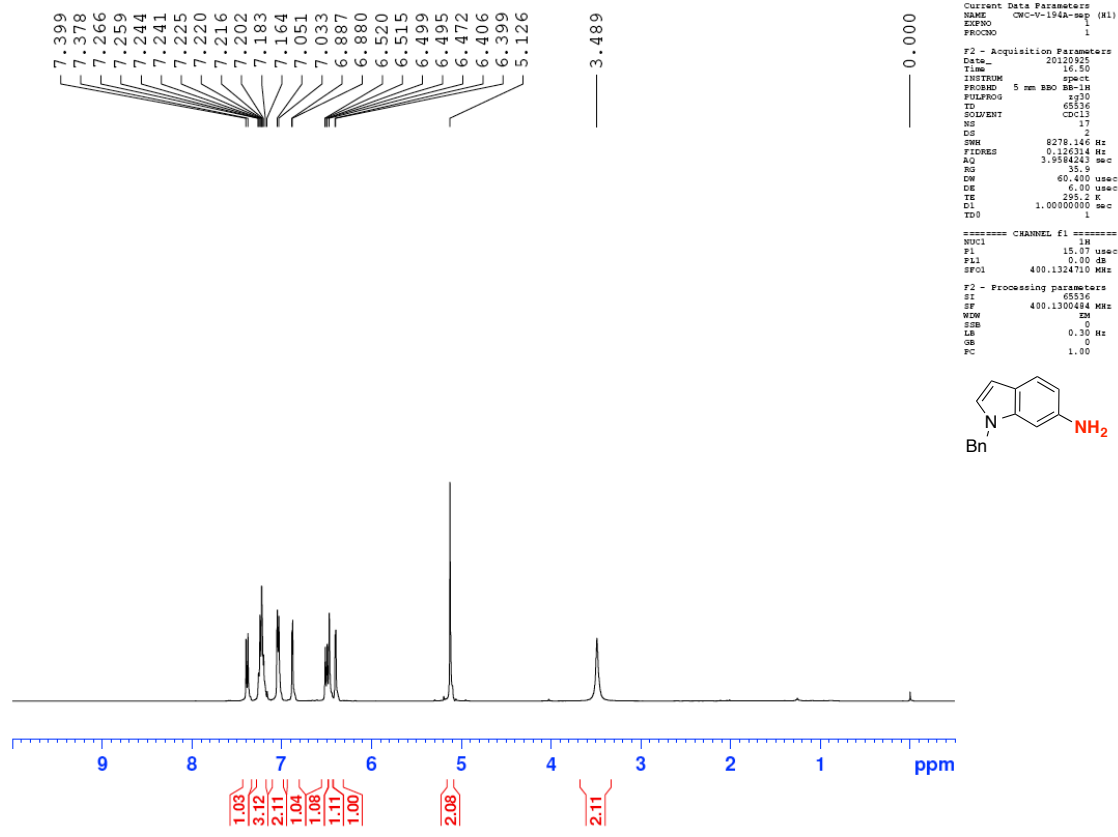

```
Current Data Parameters
NAME CWC-V-194A-nsp (K1)
EXPNO 1
PROCNO 1

F2 - Acquisition Parameters
Date_ 20120925
Time 16.50
INSTRUM spect
PROBHD 5 mm BBO BB-1H
PULPROG zgpg30
TD 65536
SOLVENT CDCl3
NS 17
DS 2
SWH 8278.146 Hz
FIDRES 0.32314 Hz
AQ 3.9584243 sec
RG 35.9
CW 60.000 usec
DE 6.00 usec
TE 295.2 K
D1 1.0000000 sec
TD0 1

===== CHANNEL f1 =====
NUC1 1H
P1 15.07 usec
PL1 0.00 dB
SFO1 400.1324710 MHz

F2 - Processing parameters
SI 65536
SF 400.130484 MHz
WDW EM
SSB 0
LB 0.30 Hz
GB 0
FC 1.00
```

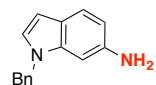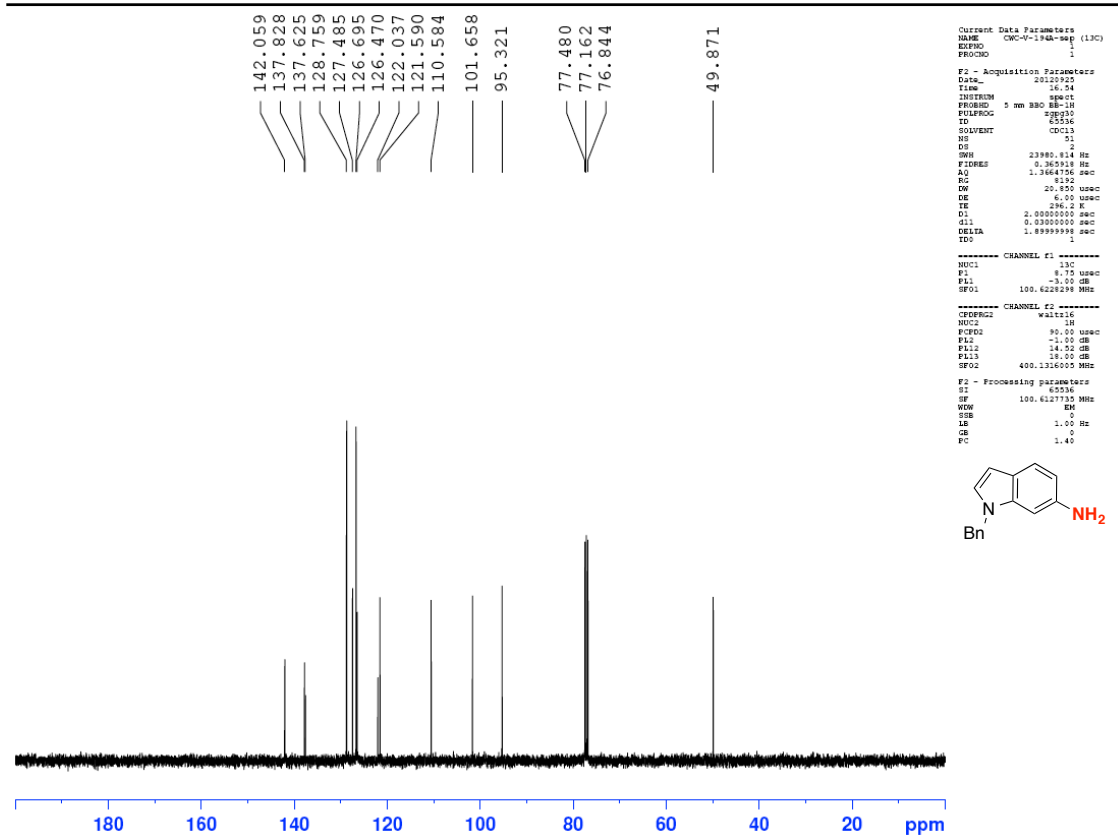

```
Current Data Parameters
NAME CWC-V-194A-nsp (13C)
EXPNO 1
PROCNO 1

F2 - Acquisition Parameters
Date_ 20120925
Time 16.54
INSTRUM spect
PROBHD 5 mm BBO BB-1H
PULPROG zgpg30
TD 65536
SOLVENT CDCl3
NS 01
DS 1
SWH 23980.814 Hz
FIDRES 0.36098 Hz
AQ 1.3364756 sec
RG 81.2
CW 20.550 usec
DE 6.00 usec
TE 295.2 K
D1 2.0000000 sec
d11 0.0200000 sec
DELTA 1.8999998 sec
TD0 1

===== CHANNEL f1 =====
NUC1 13C
P1 8.75 usec
PL1 -3.00 dB
SFO1 100.628389 MHz

===== CHANNEL f2 =====
CPDPRG2 waltz16
NUC2 1H
PCPD2 90.00 usec
PL12 -1.00 dB
PL13 14.52 dB
PL14 28.00 dB
SFO2 400.1316000 MHz

F2 - Processing parameters
SI 65536
SF 100.627130 MHz
WDW EM
SSB 0
LB 1.00 Hz
GB 0
FC 1.40
```

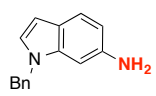

<sup>1</sup>H and <sup>13</sup>C NMR of 5-Amino-2-methylbenzothiazole (**5I**)

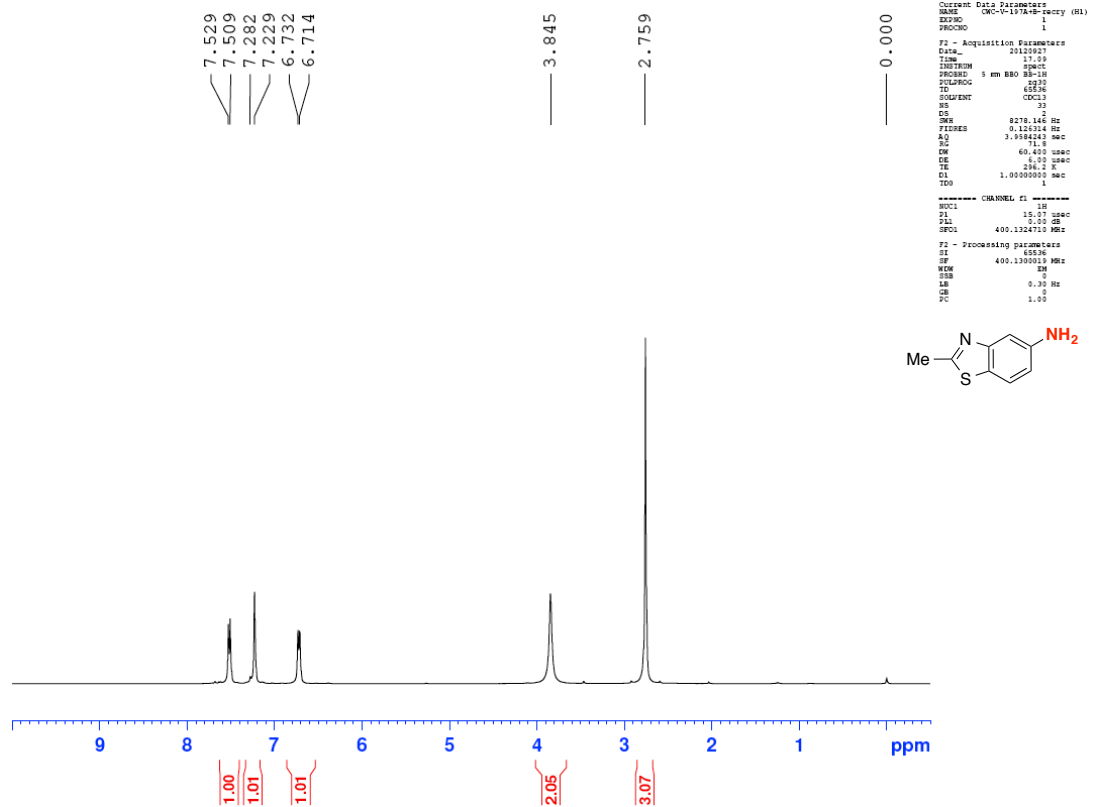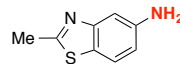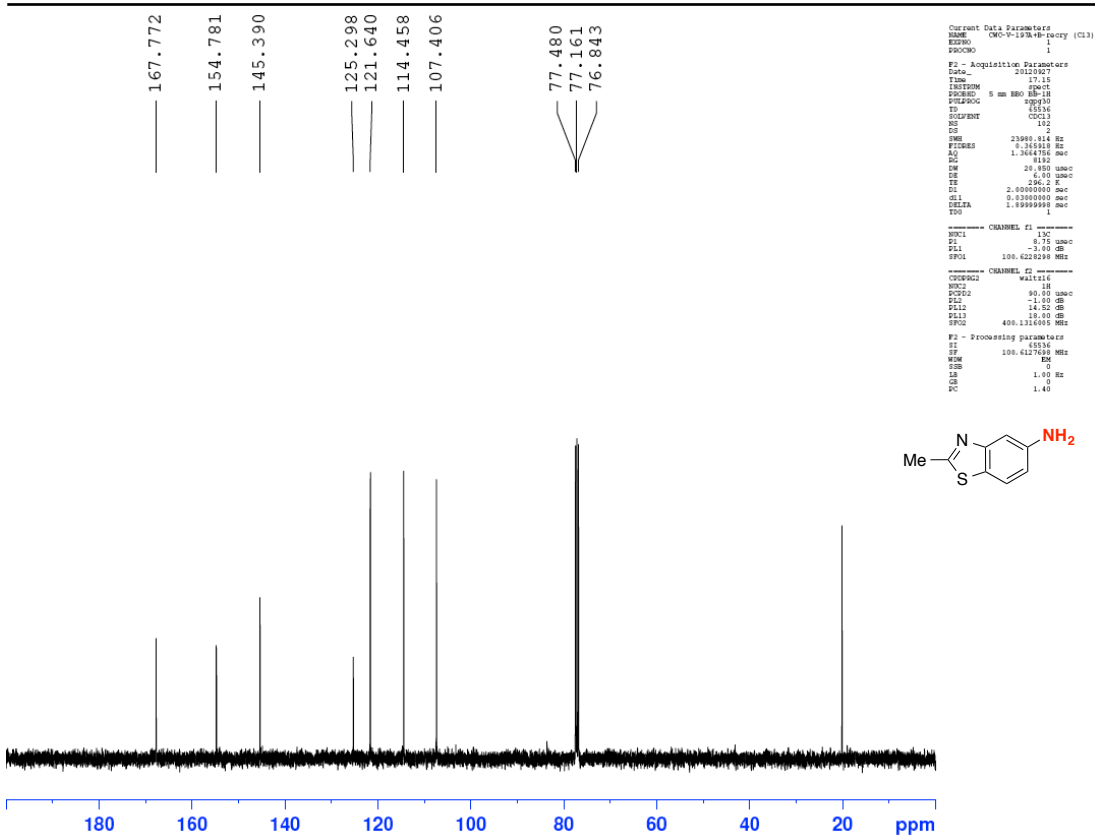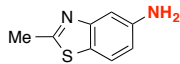

# <sup>1</sup>H and <sup>13</sup>C NMR of 5-Amino-2-methylbenzoxazole (5m)

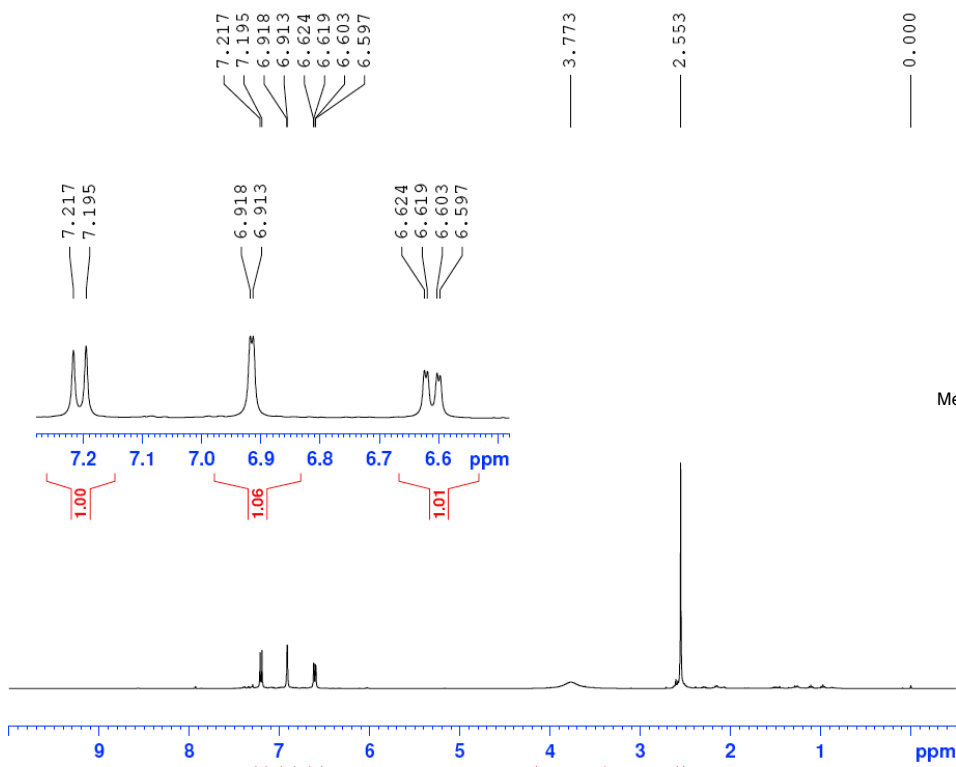

```

Current Data Parameters
NAME      CWC-V-18A-sep-2 (1H)
EXPNO    1
PROCNO   1

F2 - Acquisition Parameters
Date_    20120922
Time     3.39
INSTRUM  spect
PROBHD   5 mm BBO BB-1H
PULPROG  zgpg30
TD        65536
SOLVENT  CDCl3
NS        47
DS        2
SWH       8278.146 Hz
FIDRES    0.126314 Hz
AQ        3.9584243 sec
RG        40.3
SFO1      400.132410 MHz
F2 - Processing parameters
SI        65536
SF        400.129939 MHz
WDW       EM
SSB       0
LB        0.30 Hz
GB        0
PC        1.00
    
```

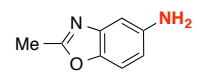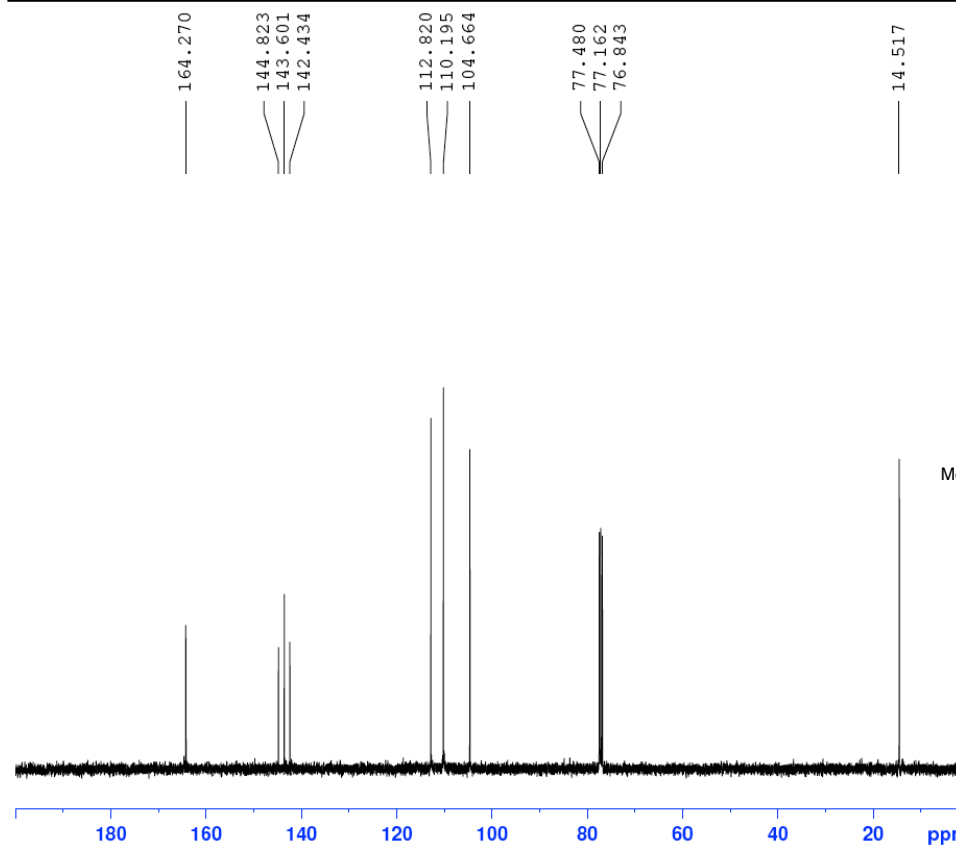

```

Current Data Parameters
NAME      CWC-V-18A-sep-2 (13C)
EXPNO    1
PROCNO   1

F2 - Acquisition Parameters
Date_    20120922
Time     3.41
INSTRUM  spect
PROBHD   5 mm BBO BB-1H
PULPROG  zgpg30
TD        65536
SOLVENT  CDCl3
NS        70
DS        2
SWH       23985.814 Hz
FIDRES    0.355338 Hz
AQ        1.3664756 sec
RG        20.850
SFO1      100.6225299 MHz
F2 - Processing parameters
SI        65536
SF        100.6131659 MHz
WDW       EM
SSB       0
LB        1.00 Hz
GB        0
PC        1.40
    
```

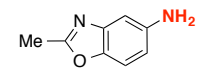



<sup>1</sup>H and <sup>13</sup>C NMR of 2-Amino-6-dimethylamino)pyrazine (**5n**)

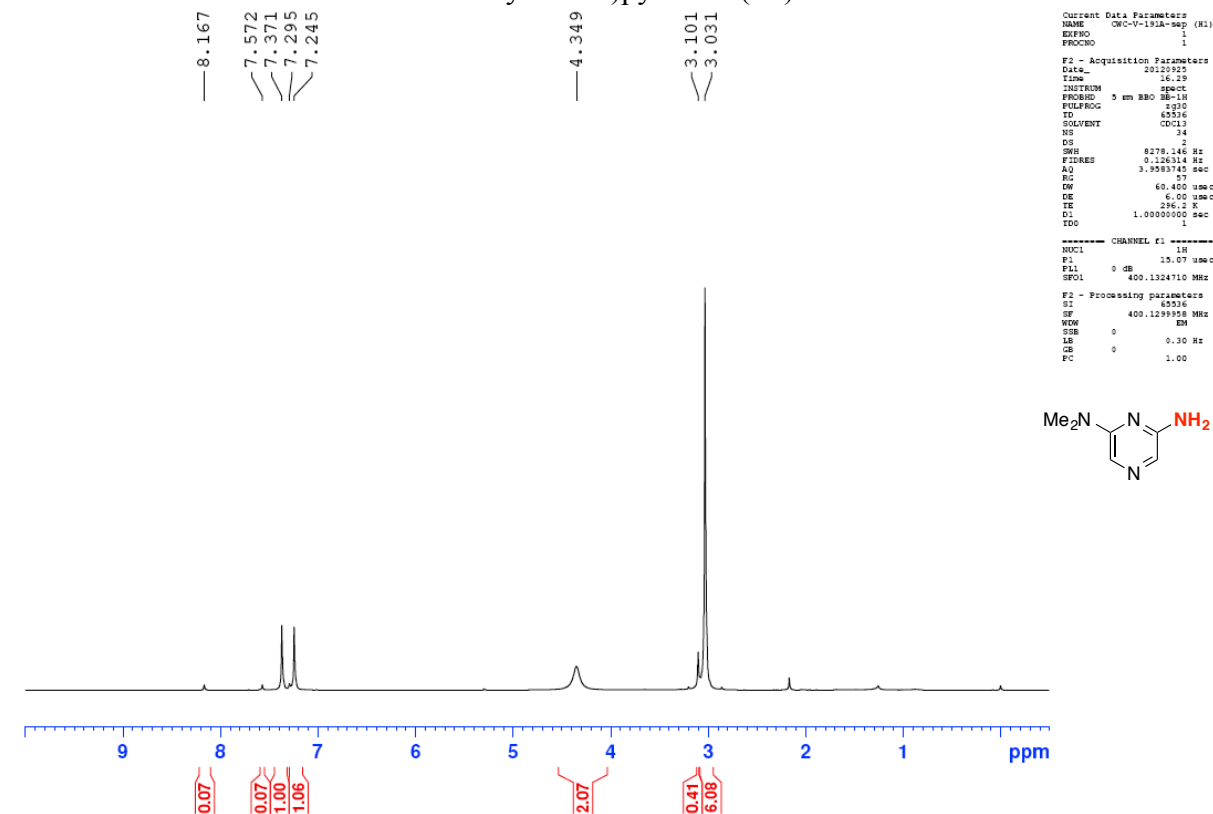

```

Current Data Parameters
NAME      CWC-V-191A-sap (K1)
EXPNO    1
PROCNO   1
----- F2 - Acquisition Parameters -----
Date_    20120925
Time     1.00
INSTRUM  spect
PROBHD   5 mm BBO
PULPROG  zgpg30
TD       65536
SOLVENT  CDCl3
NS       32
DS       2
SWH      8178.146 Hz
FIDRES   0.126314 Hz
AQ       3.9583745 sec
RG       57
DW       60.400 usec
DE       6.00 usec
TE       296.2 K
D1       1.00000000 sec
TD0      1
----- CHANNEL f1 -----
NUC1     1H
P1       15.07 usec
PL1      0 dB
SFO1     400.1324710 MHz
----- F2 - Processing parameters -----
SI       65536
SF       400.1299958 MHz
WDW      EM
SSB      0
LB       0.30 Hz
GB       0
PC       1.00
    
```

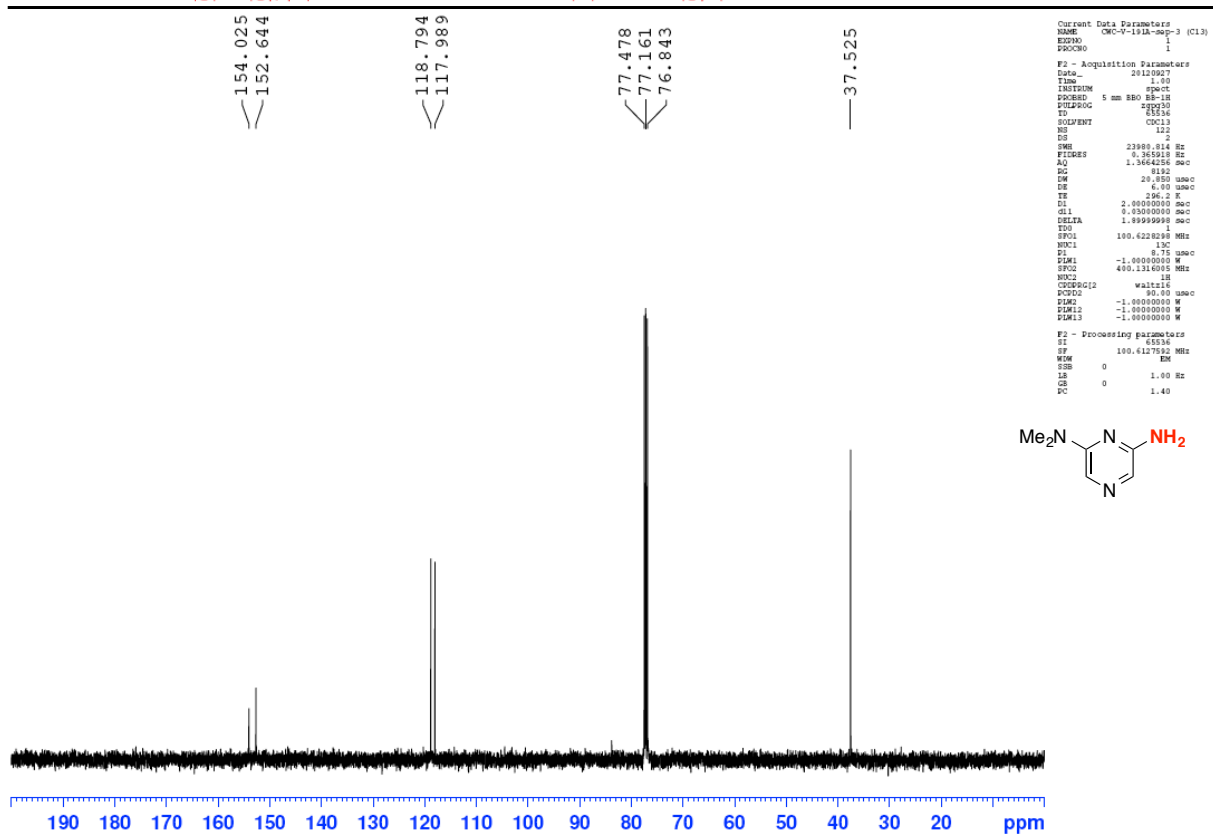

```

Current Data Parameters
NAME      CWC-V-191A-sap-3 (K13)
EXPNO    1
PROCNO   1
----- F2 - Acquisition Parameters -----
Date_    20120927
Time     1.00
INSTRUM  spect
PROBHD   5 mm BBO
PULPROG  zgpg30
TD       65536
SOLVENT  CDCl3
NS       32
DS       2
SWH      23980.814 Hz
FIDRES   0.385918 Hz
AQ       1.3064556 sec
RG       8192
DW       20.8500 usec
DE       6.00 usec
TE       296.2 K
D1       2.00000000 sec
d11      0.20000000 sec
DELTA    1.89999998 sec
IS0      1
SFO1     100.6228288 MHz
NUC1     13C
P1       8.75 usec
PL1      -1.00000000 W
SFO2     400.1316095 MHz
NUC2     1H
PCPDG12  waltz16
PCPDG2   90.00 usec
PLM2     -1.00000000 W
PLM3     -1.00000000 W
PLM13    -1.00000000 W
----- F2 - Processing parameters -----
SI       65536
SF       100.6177932 MHz
WDW      EM
SSB      0
LB       1.00 Hz
GB       0
PC       1.40
    
```

# <sup>1</sup>H and <sup>13</sup>C NMR of 2-Aminoquinoxaline (50)

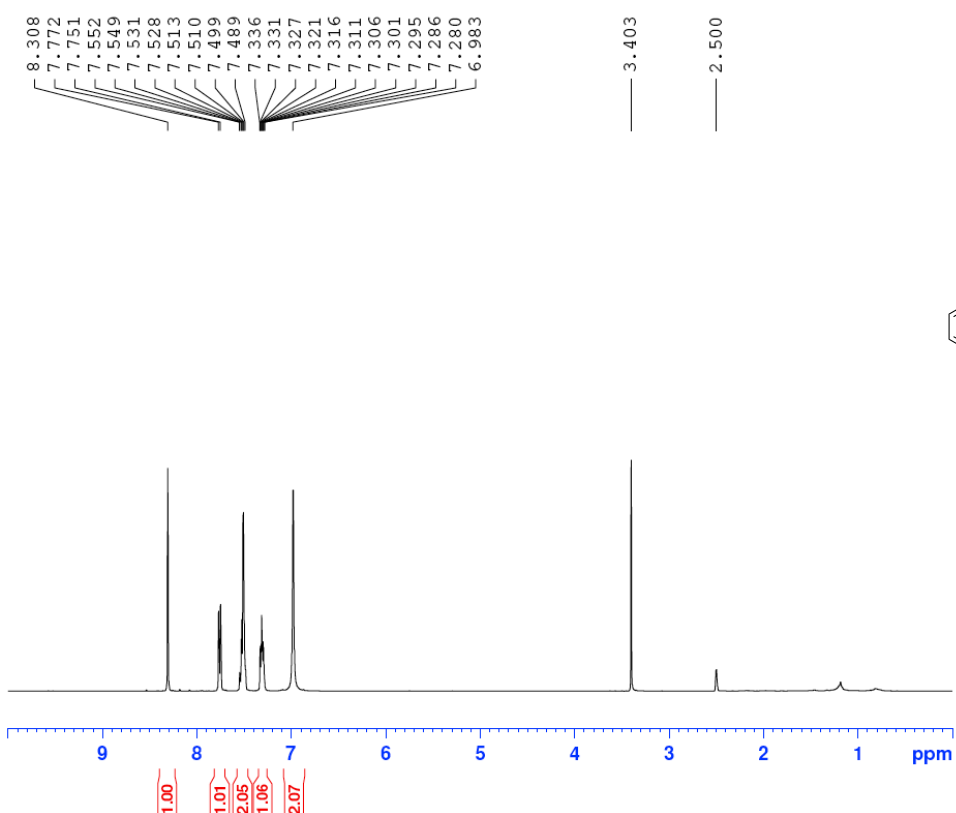

```

Current Data Parameters
NAME: 0609-170b-seg-3 (DMSO) (118)
EXPNO: 1
PROCNO: 1
F2 - Acquisition Parameters
Date_: 20120921
Time: 3:24
INSTRUM: spect
PROBHD: 5 mm BBO BB-1H
PULPROG: zgpg30
TD: 65536
SFO1: 400.1324710 MHz
NUC1: 15N
NUC2: 13C
D1: 0.05000000 sec
DELTA: 1.00000000 sec
===== CHANNEL f1 =====
NUC1: 15N
P1: 16.00 usec
PL1: 0.00 dB
SFO1: 400.1324710 MHz
F2 - Processing parameters
SI: 32768
SF: 400.1310022 MHz
WDW: EM
SSB: 0
LB: 0.30 Hz
GB: 0
PC: 1.00
  
```

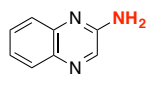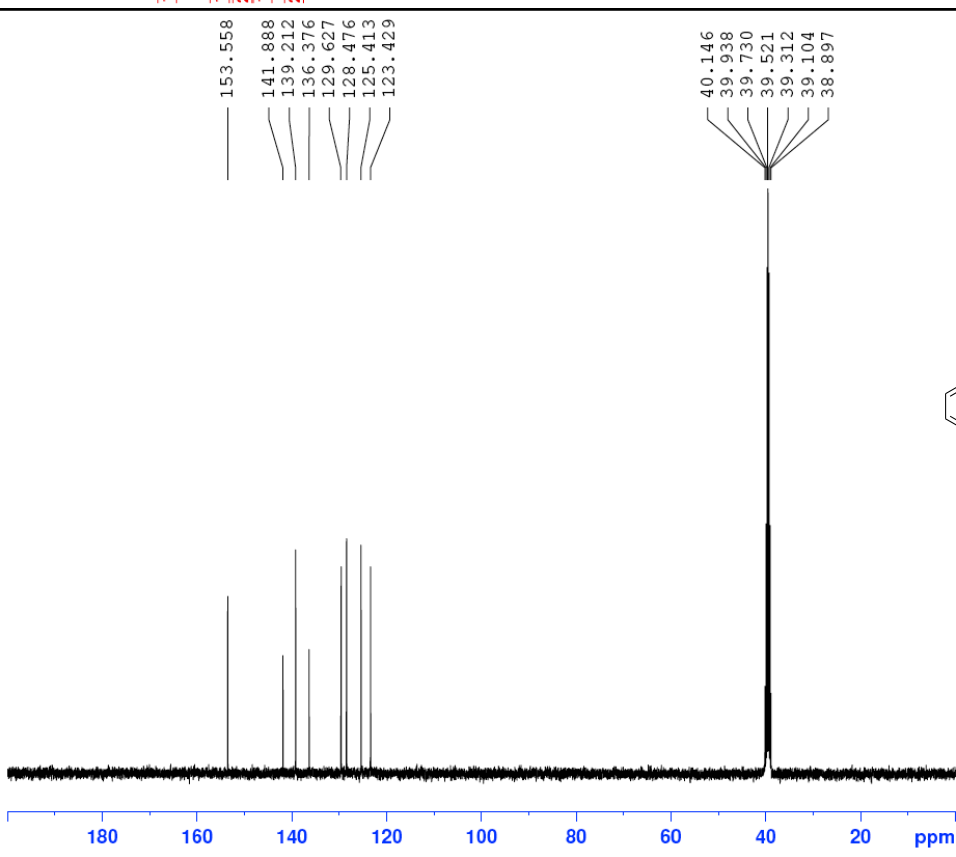

```

Current Data Parameters
NAME: 0609-170b-seg-3 (DMSO) (120)
EXPNO: 1
PROCNO: 1
F2 - Acquisition Parameters
Date_: 20120921
Time: 3:25
INSTRUM: spect
PROBHD: 5 mm BBO BB-1H
PULPROG: zgpg30
TD: 65536
SFO1: 100.6228270 MHz
NUC1: 15N
NUC2: 13C
D1: 0.05000000 sec
DELTA: 1.00000000 sec
===== CHANNEL f1 =====
NUC1: 15N
P1: 4.75 usec
PL1: -2.00 dB
SFO1: 100.6228270 MHz
===== CHANNEL f2 =====
NAME: waltz16
SI: 32768
SF: 100.6181210 MHz
WDW: EM
SSB: 0
LB: 0.30 Hz
GB: 0
PC: 1.40
  
```

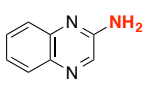

# <sup>1</sup>H and <sup>13</sup>C NMR of 6-Aminoquinoxaline (5p)

8.599  
8.595  
8.444  
8.439  
7.746  
7.723  
7.263  
7.257  
7.240  
7.234  
6.936  
6.930  
— 6.077

— 3.393

— 2.500

```
Current Data Parameters (H1)
NAME CWC-V-247A-esp
EXPNO 1
PROCNO 1

F2 - Acquisition Parameters
Date_ 20121104
Time 0.58
INSTRUM spect
PROBHD 5 mm BBO BB-1H
PULPROG zgpg30
TD 65536
SOLVENT DMSO
NS 16
DS 2
SWH 8278.146 Hz
FIDRES 0.126314 Hz
AQ 3.9583745 sec
RG 35.9
DW 60.400 usec
DE 6.00 usec
TE 298.2 K
D1 1.00000000 sec
TDO 1
```

```
----- CHANNEL f1 -----
NUC1 1H
P1 15.07 usec
PL1 0 dB
SFO1 400.1324110 MHz

F2 - Processing Parameters
SI 65536
SF 400.130027 MHz
WDW EM
SSB 0
LB 0.30 Hz
GB 0
PC 1.00
```

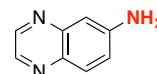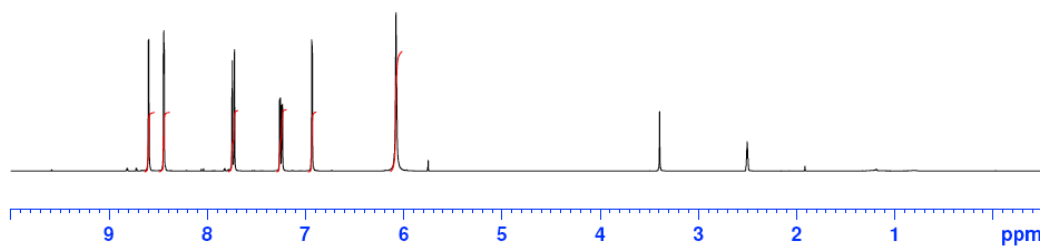

1.00  
1.00  
1.03  
1.05  
1.01  
2.03

150.529  
144.980  
144.892  
139.687  
136.519  
129.667  
122.391

— 104.996

40.147  
39.939  
39.730  
39.522  
39.312  
39.103  
38.894

```
Current Data Parameters (C13)
NAME CWC-V-247A-esp
EXPNO 1
PROCNO 1

F2 - Acquisition Parameters
Date_ 20121104
Time 1.03
INSTRUM spect
PROBHD 5 mm BBO BB-1H
PULPROG zgpg30
TD 65536
SOLVENT DMSO
NS 55
DS 2
SWH 23989.814 Hz
FIDRES 0.365818 Hz
AQ 1.3842256 sec
RG 18399.4
DW 28.850 usec
DE 6.00 usec
TE 298.2 K
D1 2.00000000 sec
d11 0.00000000 sec
DELTA 1.99999999 sec
TDO 0
SFO1 100.6282290 MHz
NUC1 13C
P1 8.75 usec
PL1 -1.00000000 W
SFO2 400.1316095 MHz
NUC2 1H
CPDPRG2 waltz16
PCPD2 80.00 usec
PLM2 -1.00000000 W
PLM12 -1.00000000 W
PLM13 -1.00000000 W

F2 - Processing parameters
SI 65536
SF 100.6120155 MHz
WDW EM
SSB 0
LB 1.00 Hz
GB 0
PC 1.40
```

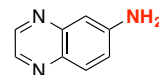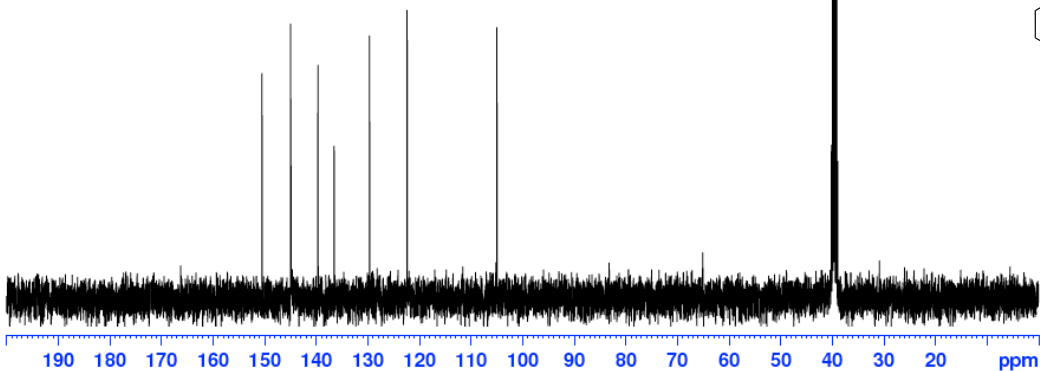

190 180 170 160 150 140 130 120 110 100 90 80 70 60 50 40 30 20 ppm

<sup>1</sup>H and <sup>13</sup>C NMR of 2-Amino-4,6-dimethoxypyrimidine (**5q**)

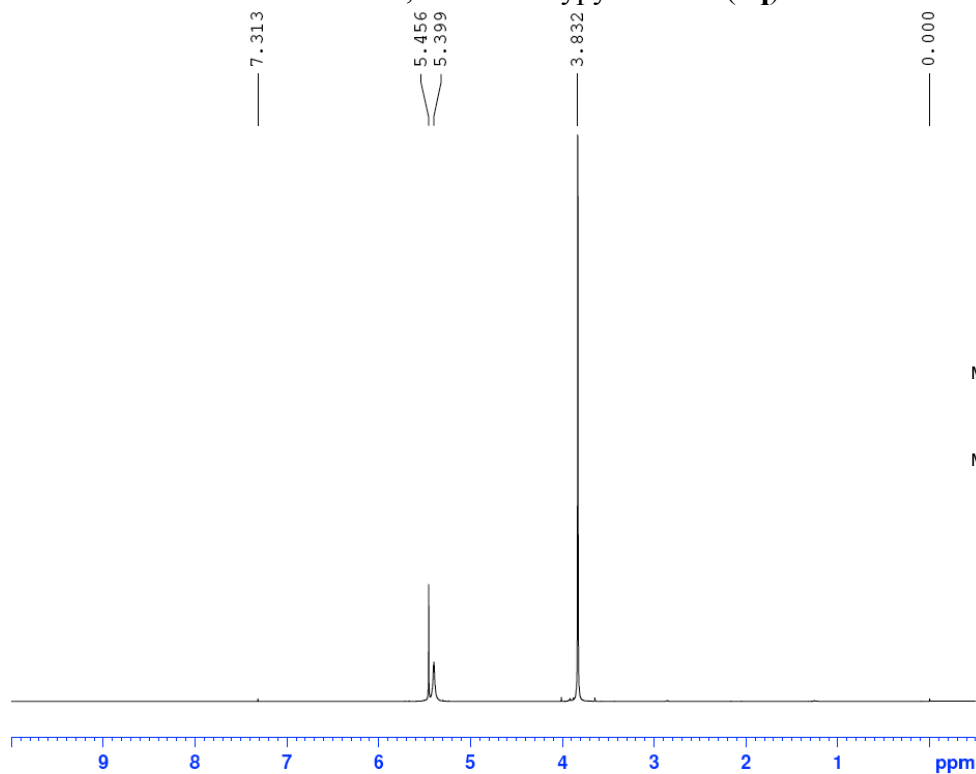

```

Current Data Parameters
NAME  CMC-N-171a-sep (1H)
EXPNO  1
PROCNO  1
F2 - Acquisition Parameters
Date_  20120913
Time  19.16
INSTRUM  spect
PROBHD  5 mm BBO BB-1H
PULPROG  zgpg30
TD  65536
SOLVENT  CDCl3
NS  32
DS  2
SWH  8278.146 Hz
FIDRES  0.126314 Hz
AQ  3.258642 sec
RG  385
RW  40.400 usec
RE  6.00 usec
TE  297.2 K
D1  1.0000000 sec
TD0
----- CHANNEL f1 -----
NUC1  1H
P1  12.00 usec
PL1  0.00 dB
SFO1  400.1324710 MHz
F2 - Processing parameters
SI  65536
SF  400.1324710 MHz
WDW  EM
SSB  0
LB  0.30 Hz
GB  0
PC  1.00
    
```

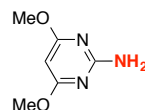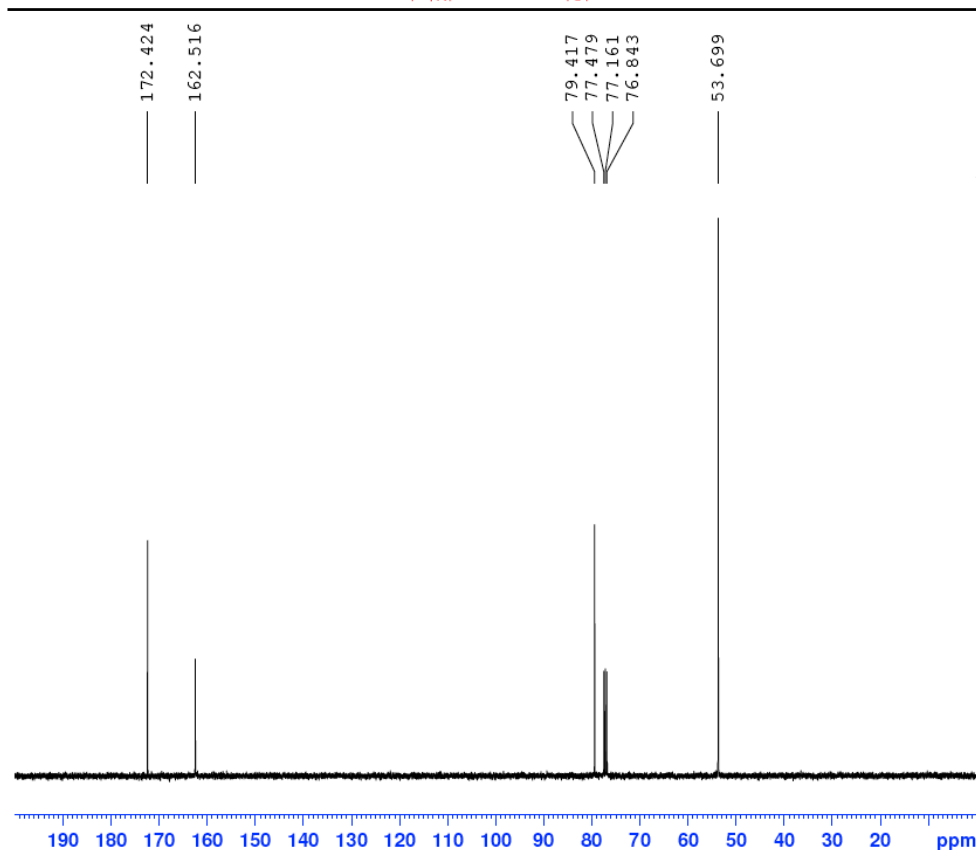

```

Current Data Parameters
NAME  CMC-N-171a-sep (13C)
EXPNO  1
PROCNO  1
F2 - Acquisition Parameters
Date_  20120913
Time  19.16
INSTRUM  spect
PROBHD  5 mm BBO BB-1H
PULPROG  zgpg30
TD  65536
SOLVENT  CDCl3
NS  32
DS  2
SWH  23980.814 Hz
FIDRES  0.353018 Hz
AQ  1.3664756 sec
RG  14384
RW  20.850 usec
RE  6.00 usec
TE  297.2 K
D1  2.0000000 sec
d11  0.0100000 sec
DELTA  1.9999999 sec
TD0
----- CHANNEL f1 -----
NUC1  13C
P1  8.75 usec
PL1  -3.00 dB
SFO1  100.6223298 MHz
----- CHANNEL f2 -----
CPDPRG2  waltz16
NUC2  1H
PCPD2  90.00 usec
PL2  -1.00 dB
PL12  14.52 dB
PL13  18.00 dB
SFO2  400.1314095 MHz
F2 - Processing parameters
SI  65536
SF  100.6121624 MHz
WDW  EM
SSB  0
LB  1.00 Hz
GB  0
PC  1.40
    
```

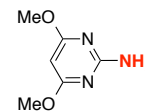

<sup>1</sup>H and <sup>13</sup>C NMR of 2-Amino-5-(2-methoxyethoxy)pyrimidine (**5r**)

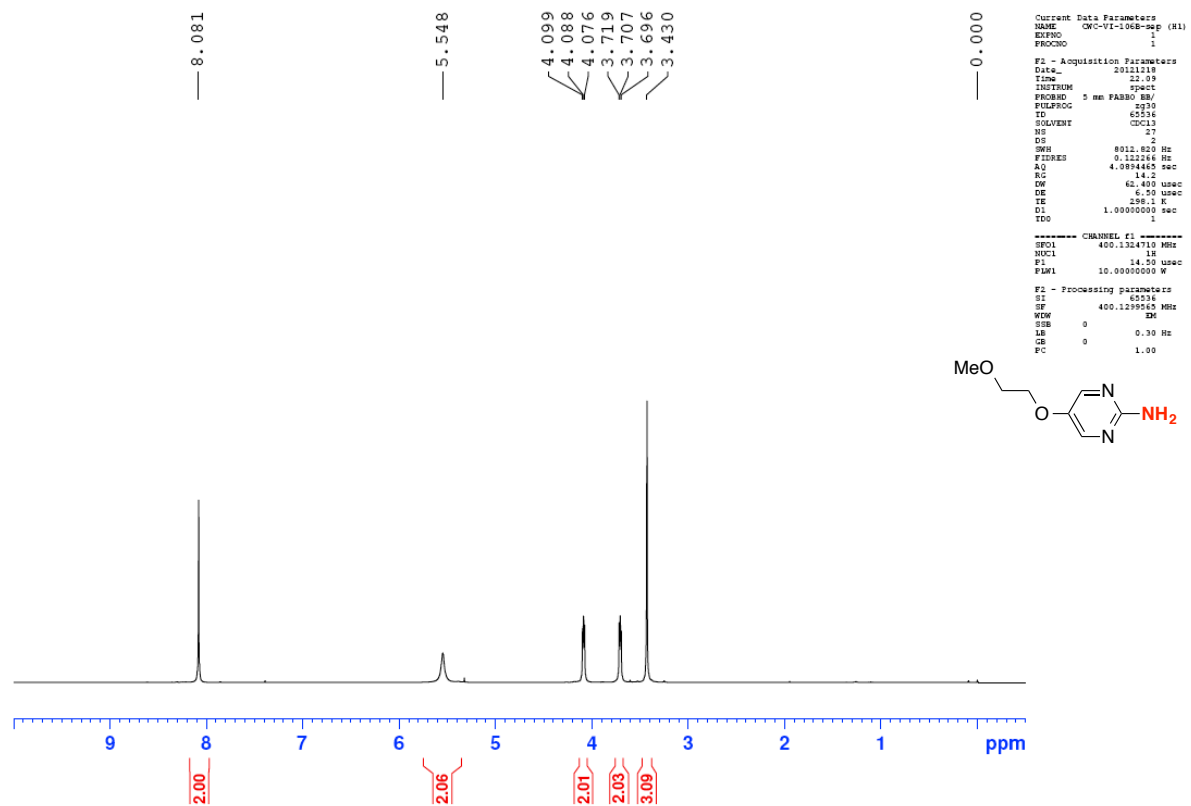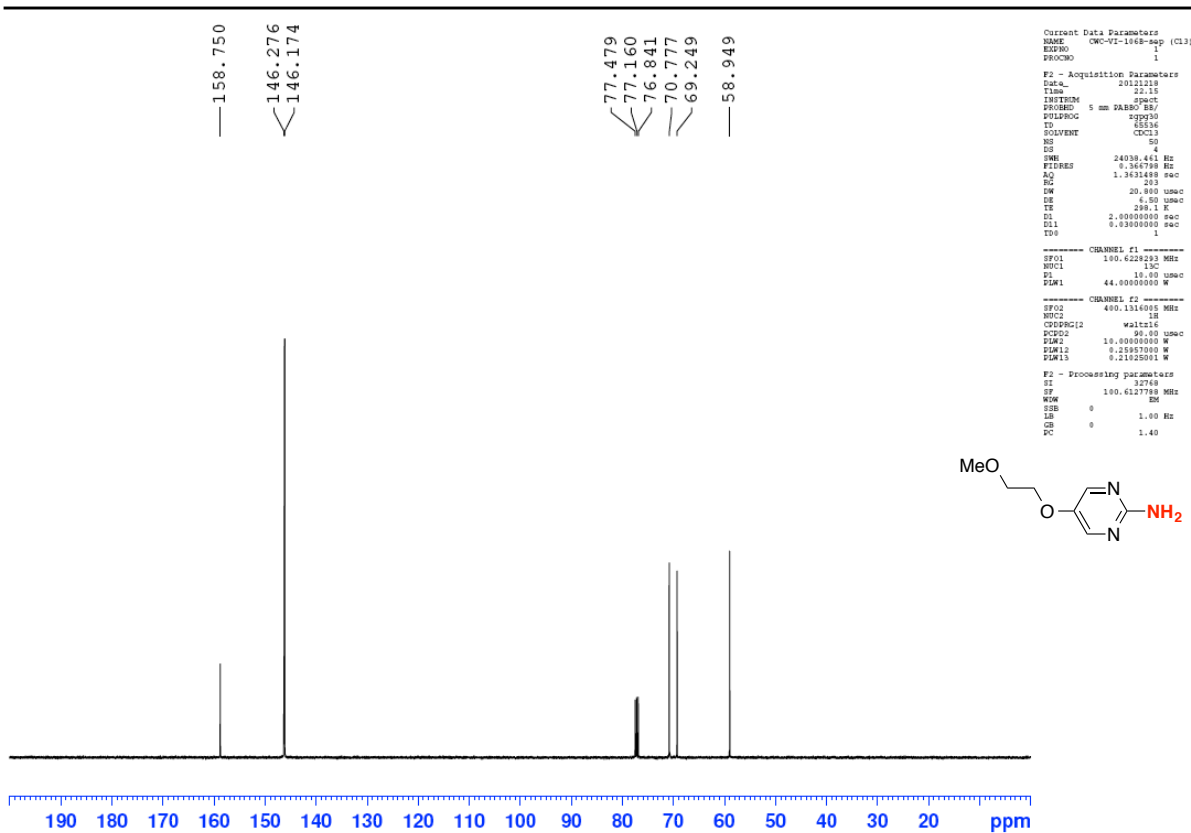

<sup>1</sup>H and <sup>13</sup>C NMR of 3-Amino-6-(3,5-dimethyl-1H-pyrazol-1-yl)pyridazine (5s)

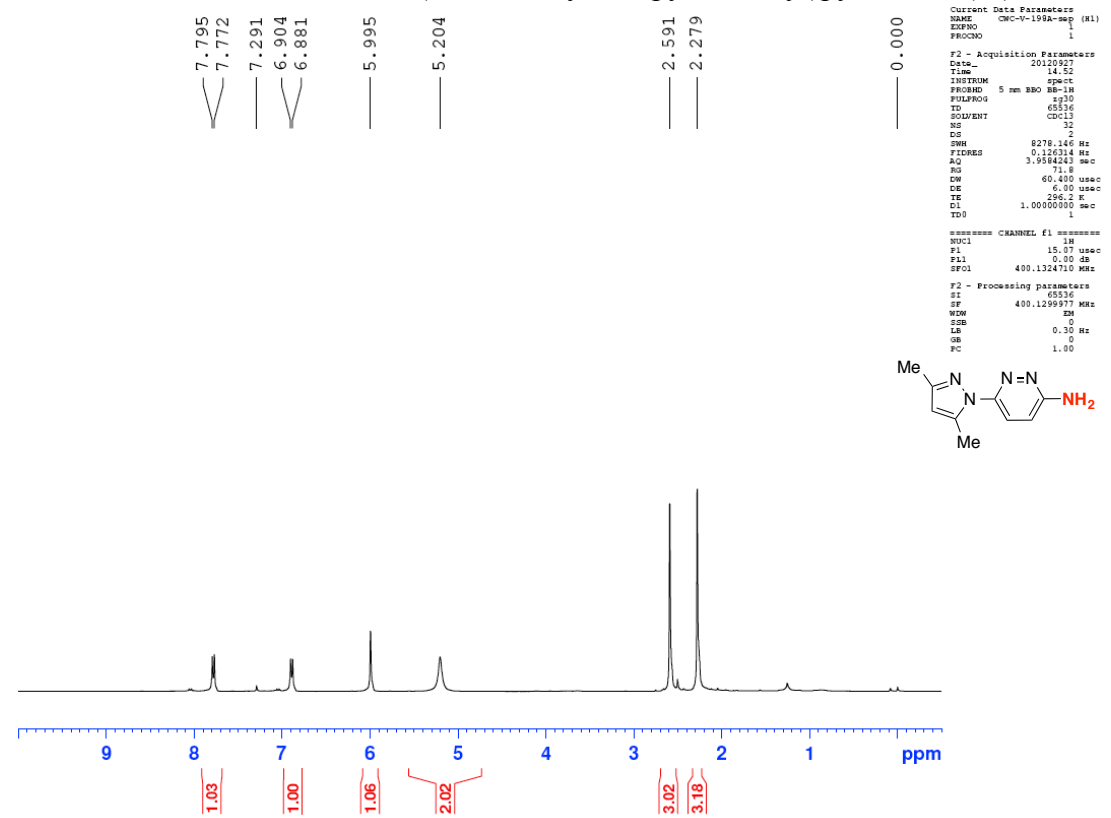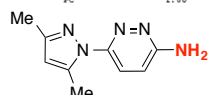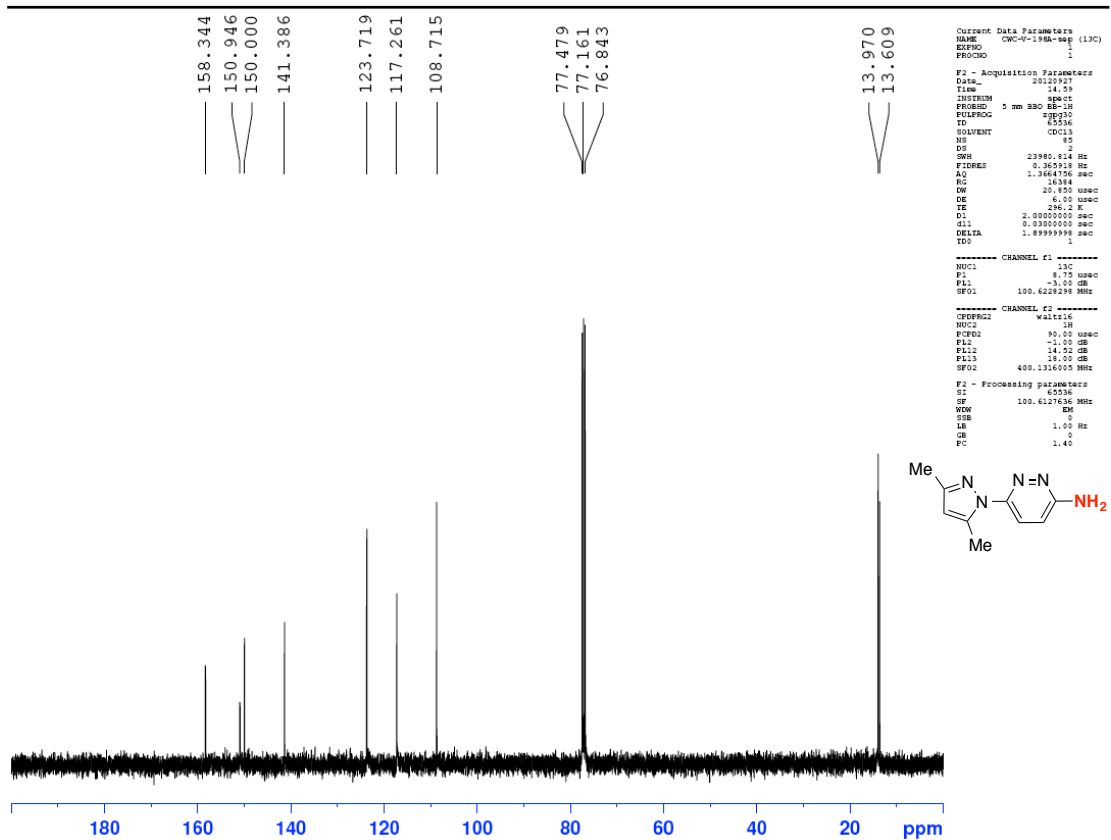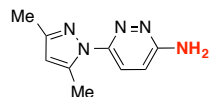

<sup>1</sup>H and <sup>13</sup>C NMR of 3-Amino-9-ethyl-9H-carbazole (5t)

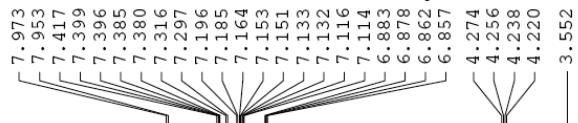

```

Current Data Parameters
NAME 2MO-9-222A-18 (acryl)-mg
EXPNO 1
PROCNO 1
F2 - Acquisition Parameters
Date_ 20121009
Time 20:49
INSTRUM spect
PROBHD 5 mm BBO BB-1H
PULPROG zgpg30
TD 65536
SOLVENT CDCl3
NS 2
DS 4
SWH 5278.146 Hz
FIDRES 0.181818 Hz
AQ 3.391821 sec
RG 252.2
CW 40.000 usec
DE 236.2 K
TE 300.2 K
D1 1.0000000 sec
DELTA 1
===== CHANNEL f1 =====
NUC1 1H
P1 15.07 usec
PL1 0.00 dB
SFO1 400.1224710 MHz
F2 - Processing parameters
SI 65536
SF 400.1224710 MHz
WDW EM
SSB 0
LB 0.30 Hz
GB 0
PC 1.00
  
```

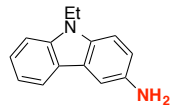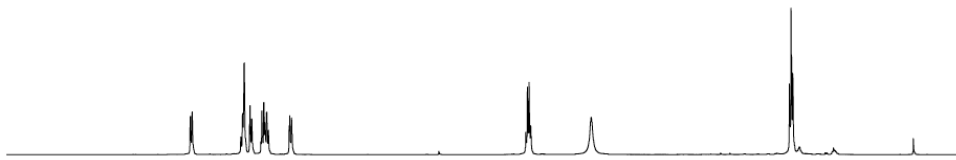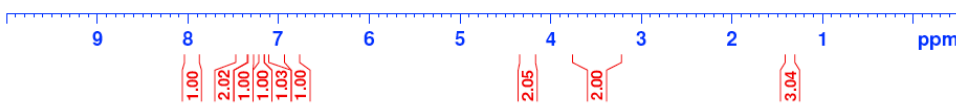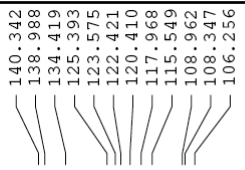

```

Current Data Parameters
NAME 2MO-9-222A-18 (c13)
EXPNO 1
PROCNO 1
F2 - Acquisition Parameters
Date_ 20121009
Time 20:49
INSTRUM spect
PROBHD 5 mm BBO BB-1H
PULPROG zgpg30
TD 65536
SOLVENT CDCl3
NS 2
DS 4
SWH 23980.814 Hz
FIDRES 0.365316 Hz
AQ 1.3664756 sec
RG 252.2
CW 20.850 usec
DE 236.2 K
TE 300.2 K
D1 2.0000000 sec
D11 0.0000000 sec
DELTA 1.8999999 sec
ID 1
===== CHANNEL f1 =====
NUC1 13C
P1 8.75 usec
PL1 -3.00 dB
SFO1 100.6282398 MHz
===== CHANNEL f2 =====
NAME2 waltz16
NUC2 1H
PCPD2 90.00 usec
PL2 -1.00 dB
PL12 14.00 dB
PL13 14.00 dB
SFO2 400.1360000 MHz
F2 - Processing parameters
SI 65536
SF 100.6127876 MHz
WDW EM
SSB 0
LB 1.00 Hz
GB 0
PC 1.40
  
```

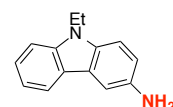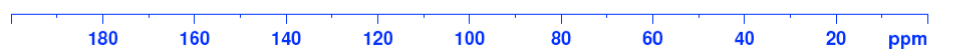

<sup>1</sup>H and <sup>13</sup>C NMR of 2,6-Dimethylaniline (6a)

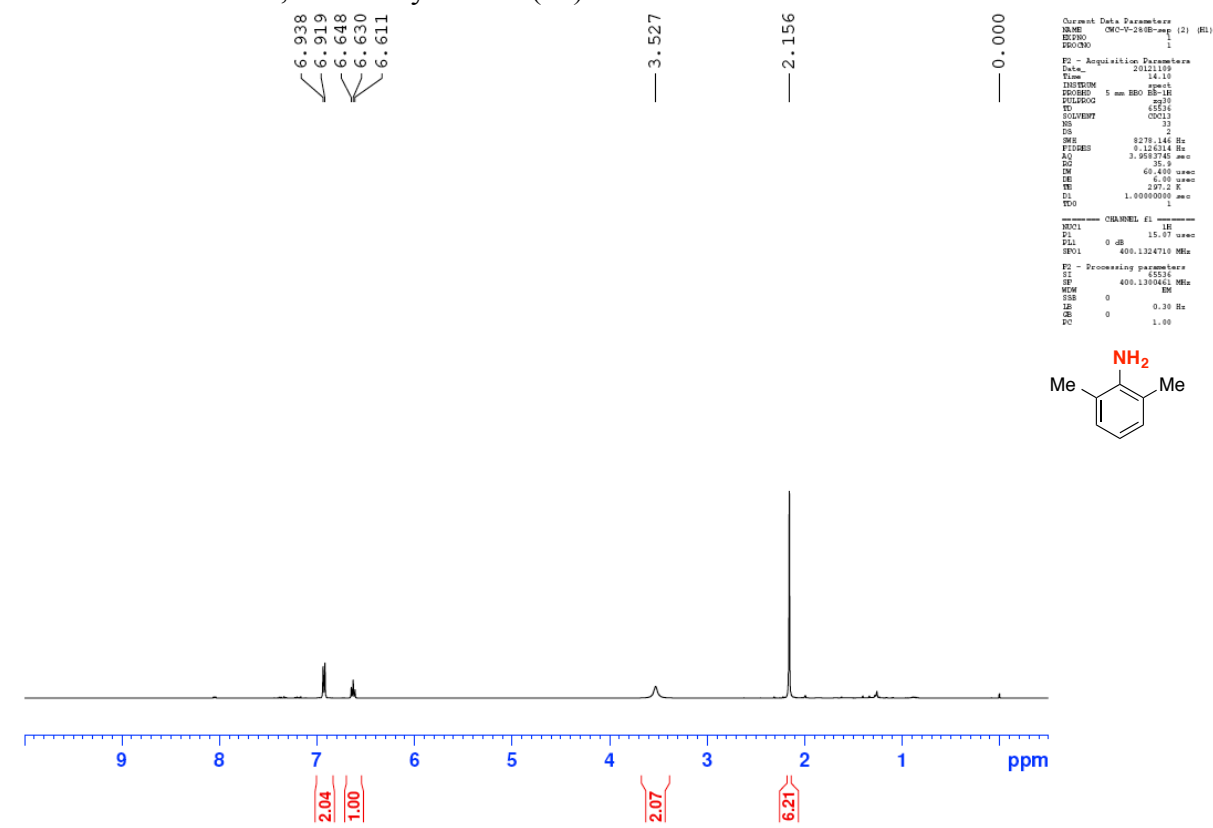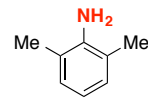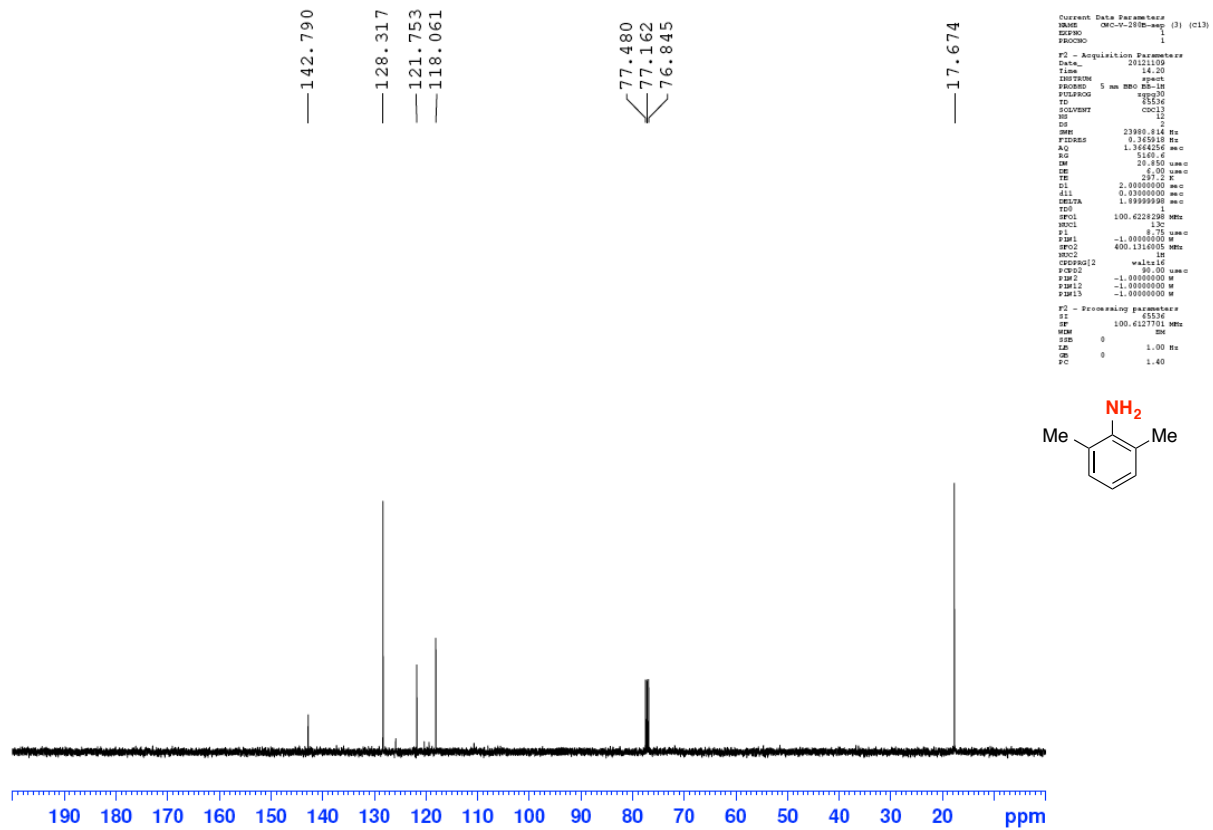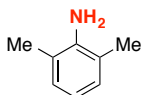



<sup>1</sup>H and <sup>13</sup>C NMR of 5-Amino-8-methoxyquinoline (6b)

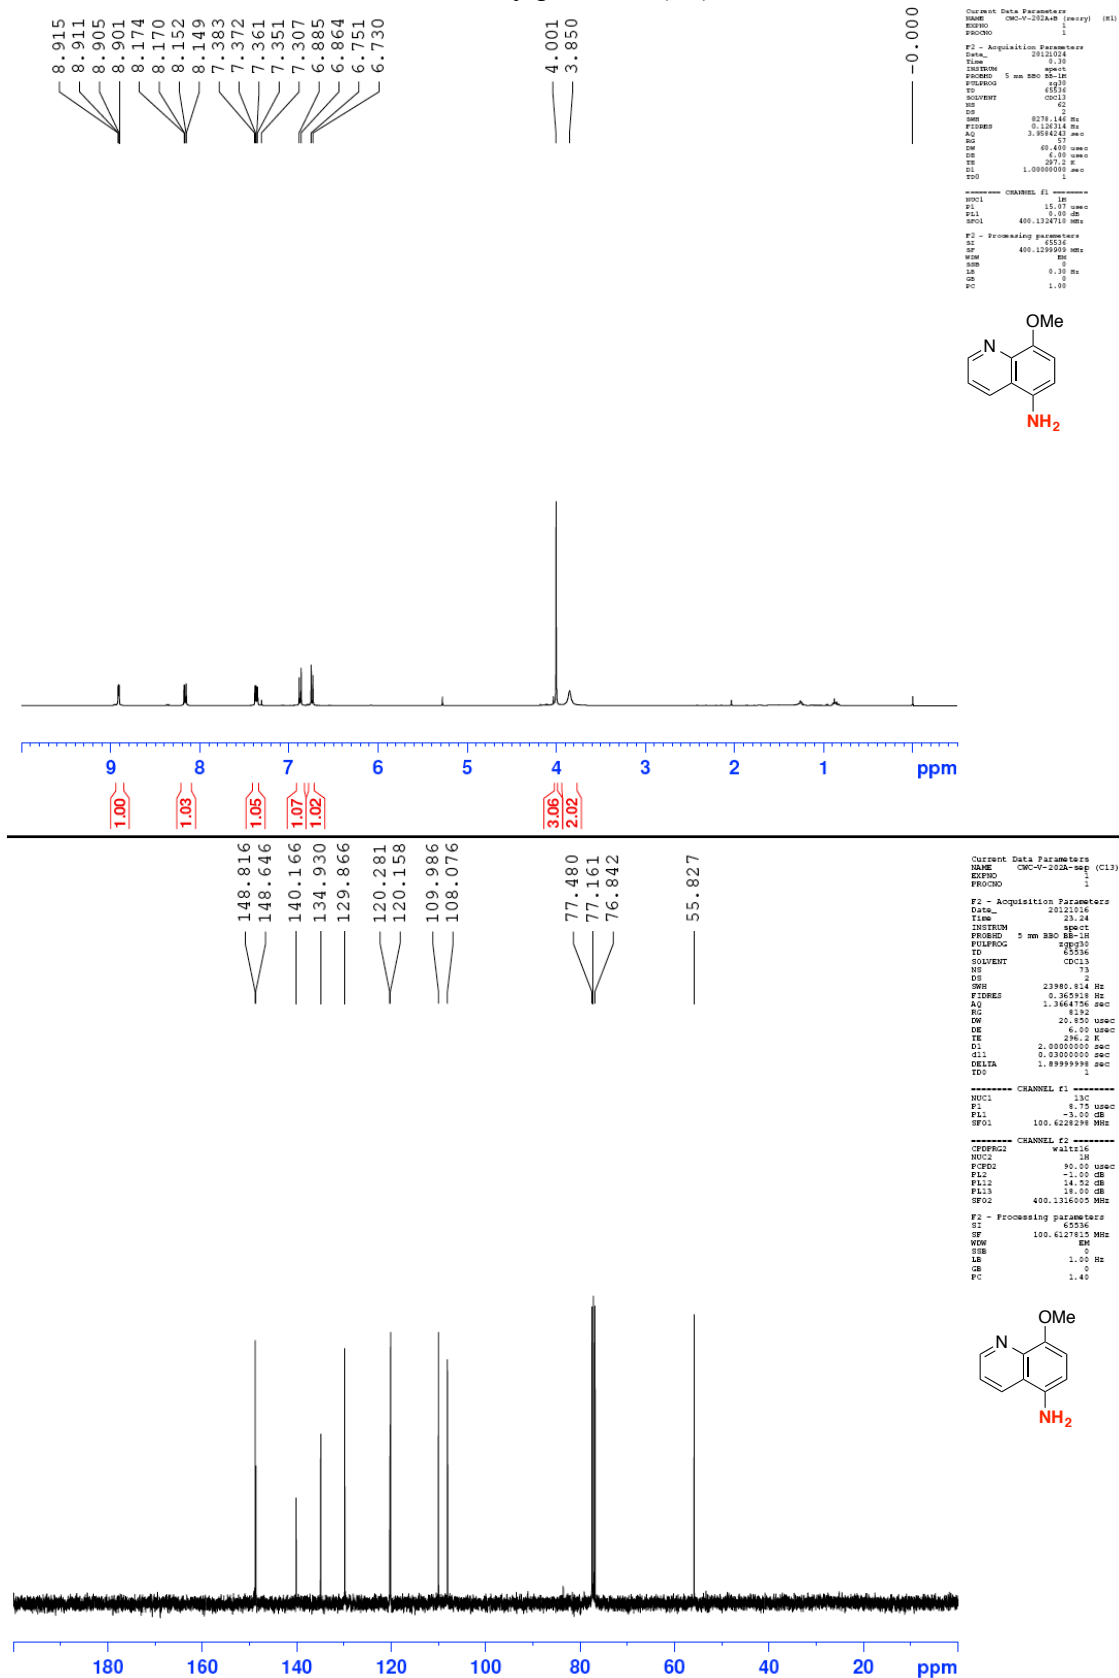

<sup>1</sup>H and <sup>13</sup>C NMR of 9-Aminophenanthrene (6c)

8.746  
8.727  
8.575  
8.555  
8.237  
8.218  
7.673  
7.659  
7.656  
7.641  
7.638  
7.620  
7.604  
7.584  
7.584  
7.450  
7.432  
7.413  
7.311  
7.293  
7.274  
6.908  
5.796

— 3.401

— 2.500

```

Current Data Parameters
NAME 060-9-270A-np (DMSO)
EXPNO 1
PROCNO 1
F2 - Acquisition Parameters
Date_ 20121101
Time 23:29
INSTRUM spect
PROBHD 5 mm BBO BB-1H
PULPROG zgpg30
TD 65536
SOLVENT DMSO
NS 2
DS 2
SWH 8270.142 Hz
FIDRES 0.122514 Hz
AQ 3.9957145 sec
RG 49.3
DE 60.450 umsec
TE 300.2 K
DE 6.00 umsec
DI 1.00000000 sec
SI 1
===== CHANNEL f1 =====
NUC1 13C
P1 15.07 umsec
PL1 0 dB
SFO1 400.1264710 MHz
F2 - Processing parameters
SI 32768
SF 400.1264710 MHz
WDW EM
SSB 0
LB 0.30 Hz
GB 0
PC 1.00
    
```

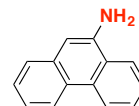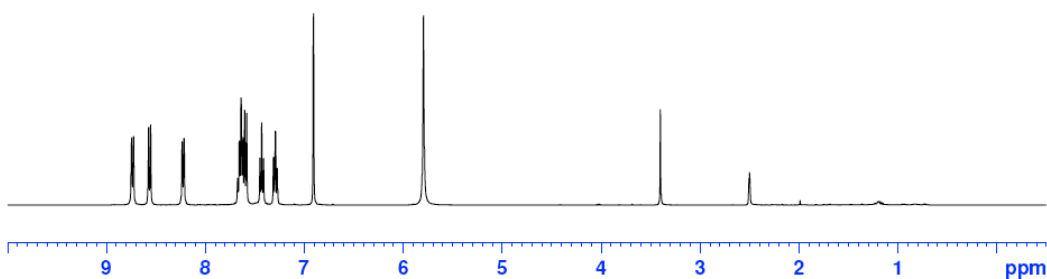

142.454  
133.773  
130.638  
126.759  
126.510  
125.880  
125.395  
125.043  
124.263  
123.112  
122.675  
122.548  
121.923  
103.774

40.147  
39.940  
39.731  
39.523  
39.314  
39.105  
38.897

```

Current Data Parameters
NAME 060-9-270A-np (DMSO)
EXPNO 1
PROCNO 1
F2 - Acquisition Parameters
Date_ 20121101
Time 23:34
INSTRUM spect
PROBHD 5 mm BBO BB-1H
PULPROG zgpg30
TD 65536
SOLVENT DMSO
NS 2
DS 2
SWH 22900.112 Hz
FIDRES 0.166518 Hz
AQ 13.968201 sec
RG 149.4
DE 24.850 umsec
TE 300.2 K
DE 6.00 umsec
DI 1.00000000 sec
SI 32768
WDW EM
SSB 0
LB 0.30 Hz
GB 0
PC 1.00
===== CHANNEL f1 =====
NUC1 13C
P1 15.07 umsec
PL1 0 dB
SFO1 400.1264710 MHz
F2 - Processing parameters
SI 32768
SF 400.1264710 MHz
WDW EM
SSB 0
LB 0.30 Hz
GB 0
PC 1.00
    
```

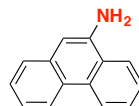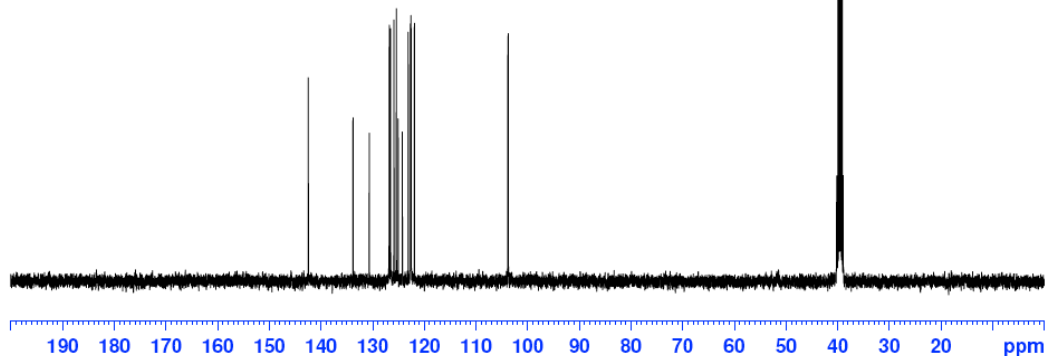

<sup>1</sup>H and <sup>13</sup>C NMR of 2-Amino-3-methylpyridine (6d)

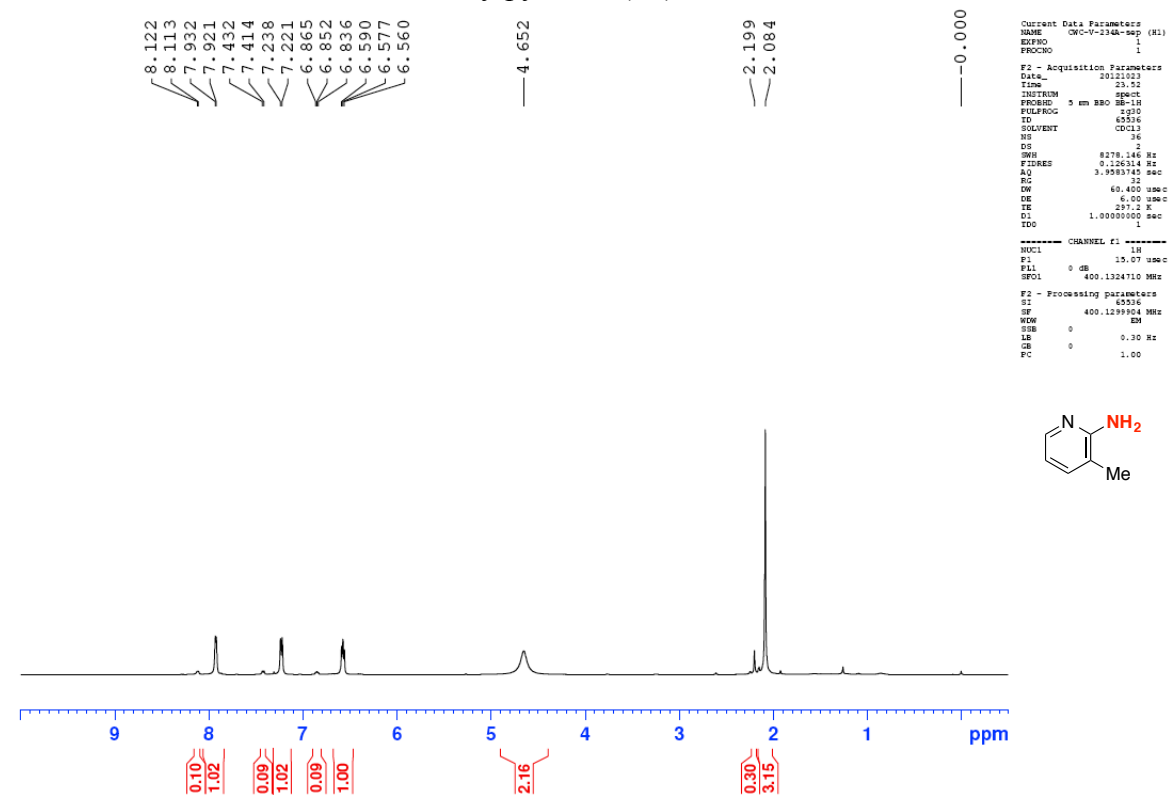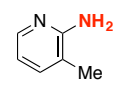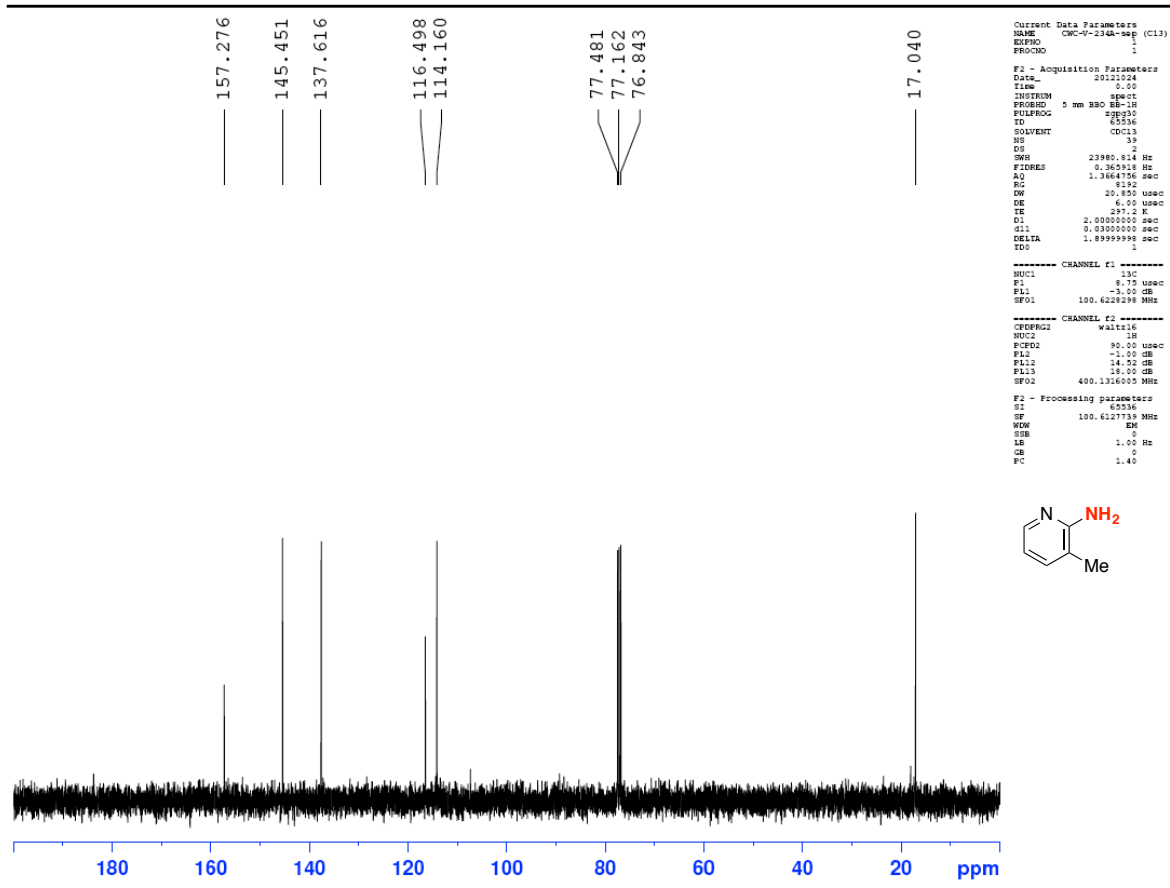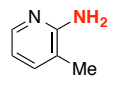

# <sup>1</sup>H and <sup>13</sup>C NMR of 1-Aminoisoquinoline (6e)

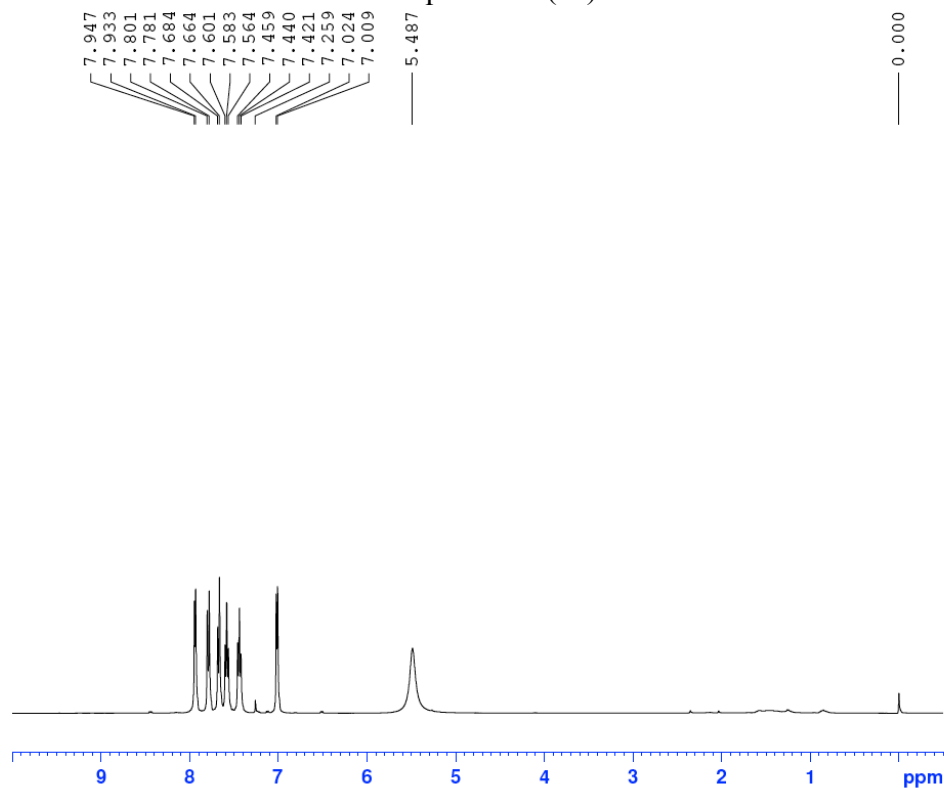

```

Current Data Parameters
NAME  OMO-V-231Aa (expt) (H1)
EXPNO  1
PROCNO  1

F2 - Acquisition Parameters
Date_  20121023
Time  13.30
INSTRUM  spect
PROBHD  5 mm BBO BB-1H
PULPROG  zgpg30
TD  65536
SOLVENT  CDCl3
DS  2
SWH  8278.146 Hz
FIDRES  0.182814 Hz
AQ  3.9584243 sec
RG  71.9
DM  60.400 usec
DE  6.00 usec
TE  296.2 K
D1  1.0000000 sec
D2  1.0000000 sec
D3  1.0000000 sec
TD0  1

===== CHANNEL f1 =====
NUC1  1H
P1  12.00 usec
PL1  0.00 dB
SFO1  400.131410 MHz

F2 - Processing parameters
SI  65536
SF  400.131410 MHz
WDW  EM
SSB  0
GB  0.30 Hz
PC  1.00
    
```

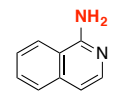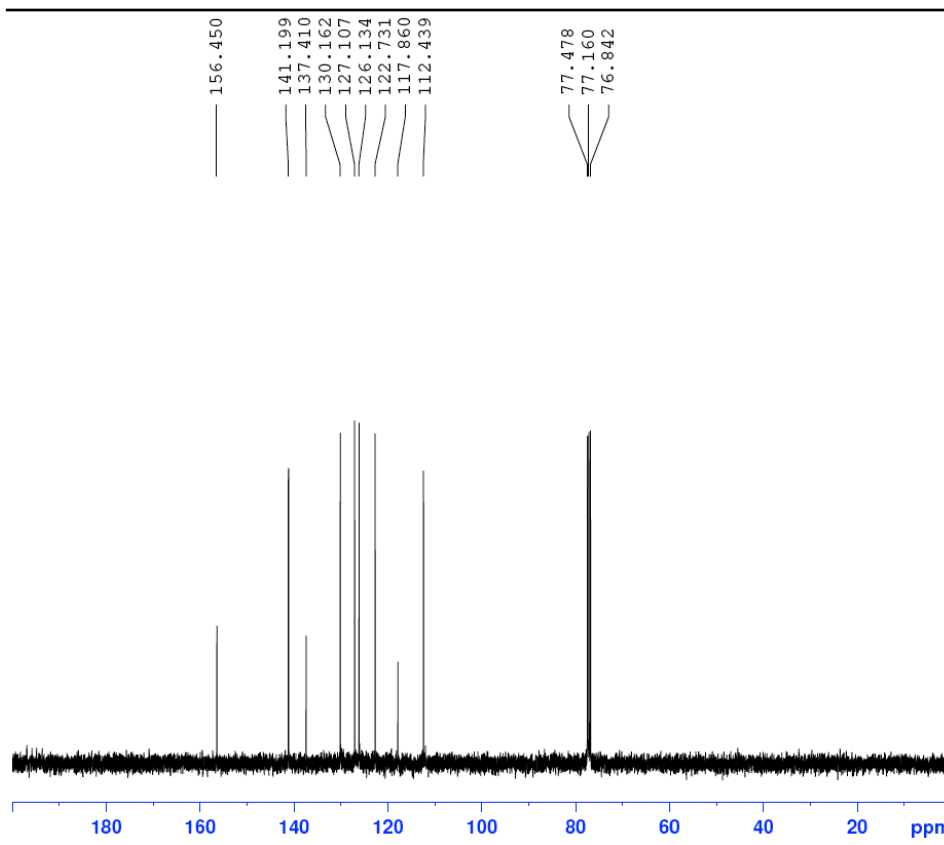

```

Current Data Parameters
NAME  OMO-V-231Aa (expt) (C13)
EXPNO  1
PROCNO  1

F2 - Acquisition Parameters
Date_  20121023
Time  13.40
INSTRUM  spect
PROBHD  5 mm BBO BB-1H
PULPROG  zgpg30
TD  65536
SOLVENT  CDCl3
DS  2
SWH  2380.814 Hz
FIDRES  0.190325 Hz
AQ  1.3687764 sec
RG  2068.5
DM  20.850 usec
DE  6.00 usec
TE  296.2 K
D1  2.0000000 sec
D2  2.0000000 sec
D3  1.9999999 sec
DELTA  1.9999999 sec
TD0  1

===== CHANNEL f1 =====
NUC1  13C
P1  12.00 usec
PL1  -1.00 dB
SFO1  100.6262099 MHz

===== CHANNEL f2 =====
NAME  MARIAS
NUC2  1H
P2P2  90.00 usec
PL2  -1.00 dB
PL12  19.00 dB
PL13  01.00 dB
SFO2  400.1314095 MHz

F2 - Processing parameters
SI  65536
SF  100.6127653 MHz
WDW  EM
SSB  0
GB  1.00 Hz
PC  1.40
    
```

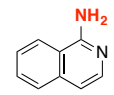

<sup>1</sup>H and <sup>13</sup>C NMR of 4-Amino-6,7-dimethoxyquinazoline (**6f**)

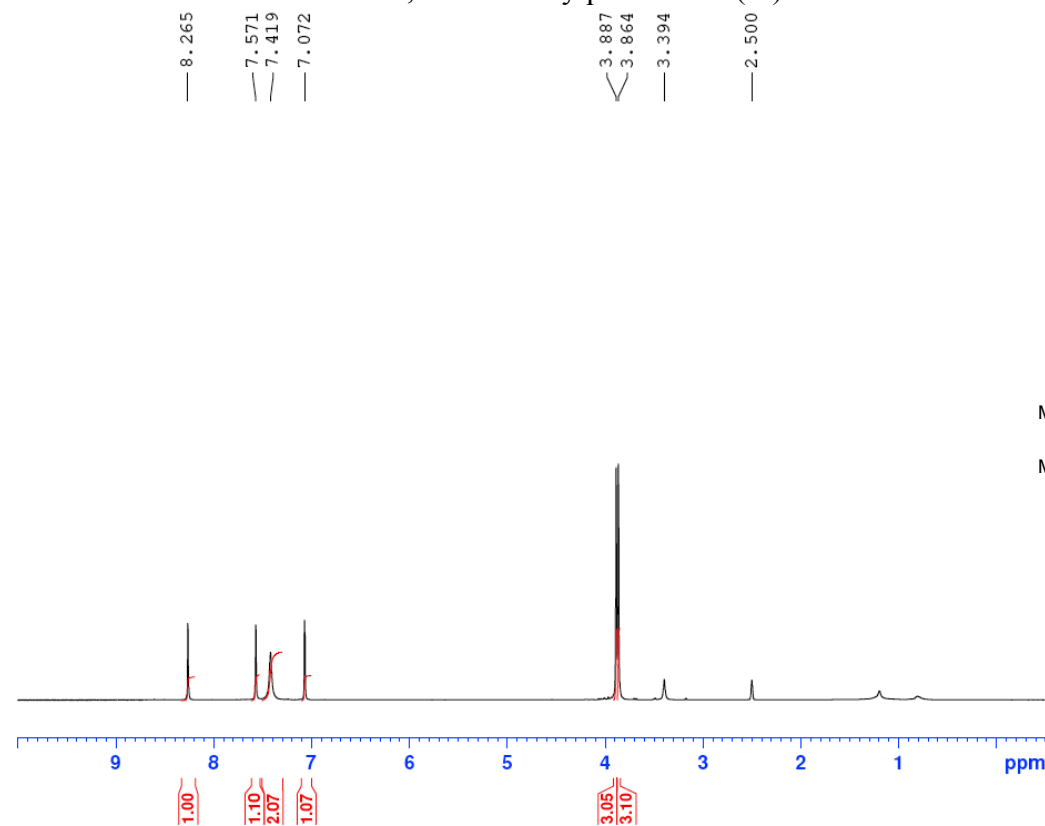

```

Current Data Parameters (R1)
NAME      CMC-V-270A-sep (R1)
EXPNO     1
PROCNO    1

F2 - Acquisition Parameters
Date_     20121031
Time      15.38
INSTRUM   spect
PROBHD    5 mm BBO BB-LH
PULPROG   zg30
TD        65536
SOLVENT   DMSO
NS         1
DS         2
SWH        8278.146 Hz
FIDRES     0.126314 Hz
AQ         3.9583745 sec
RG         90.2
DW         60.400 usec
DE         6.00 usec
TE         297.2 K
D1         1.00000000 sec
TDC        1

----- CHANNEL f1 -----
NUC1       1H
P1         15.67 usec
PL1        0 dB
SFO1       400.1324110 MHz

F2 - Processing parameters
SI         65536
SF         400.1300037 MHz
WDW        EM
SSB        0
LB         0.30 Hz
GB         0
PC         1.00
    
```

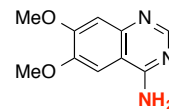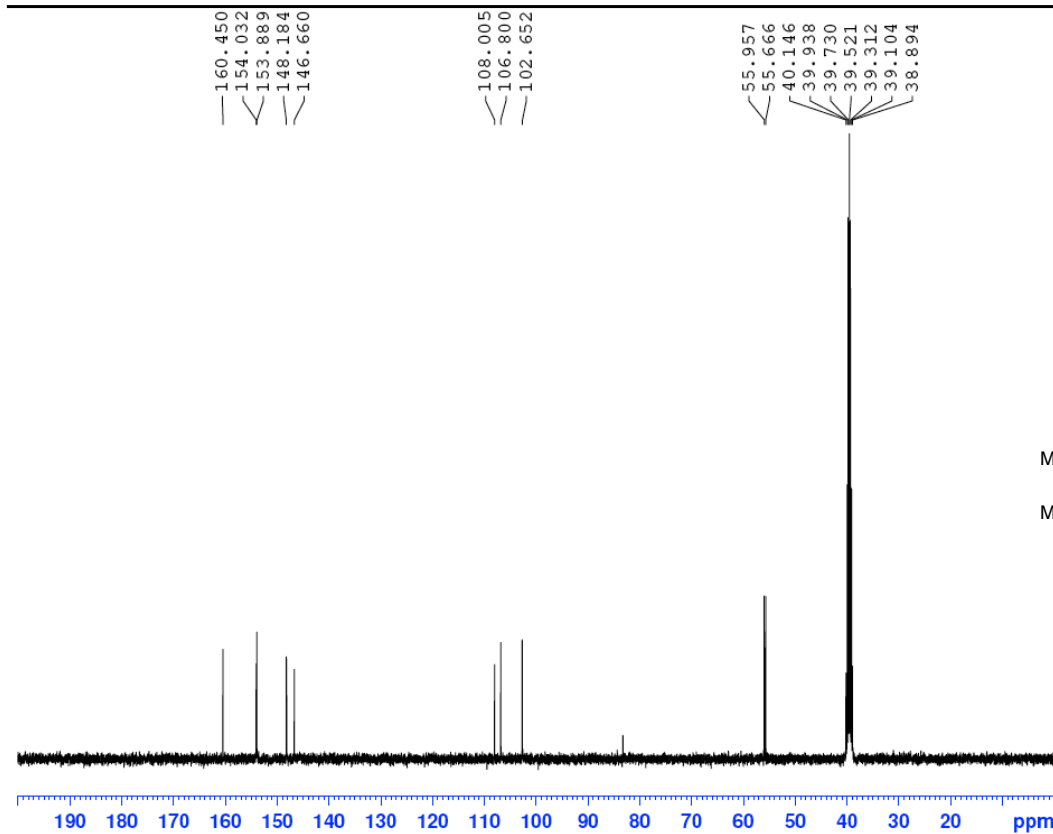

```

Current Data Parameters (C13)
NAME      CMC-V-270A-sep (C13)
EXPNO     1
PROCNO    1

F2 - Acquisition Parameters
Date_     20121031
Time      15.31
INSTRUM   spect
PROBHD    5 mm BBO BB-LH
PULPROG   zgpg30
TD        65536
SOLVENT   DMSO
NS         1
DS         2
SWH        23980.814 Hz
FIDRES     0.365208 Hz
AQ         1.3664256 sec
RG         16384
WDW        EM
SSB        0
LB         6.00 usec
TE         297.2 K
D1         2.00000000 sec
d11        0.00000000 sec
DELTA     1.89999998 sec
TDC        1
SFO1       100.6228196 MHz
NUC1       13C
P1         8.75 usec
PL1        -1.00000000 W
SFO2       400.1316005 MHz
NUC2       1H
PCPRG2(I)  waltz16
PCPD2     90.00 usec
PLAC     -1.00000000 W
PLM12     -1.00000000 W
PLM13     -1.00000000 W

F2 - Processing parameters
SI         65536
SF         100.6126130 MHz
WDW        EM
SSB        0
LB         1.00 Hz
GB         0
PC         1.40
    
```

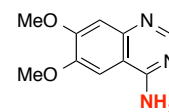

<sup>1</sup>H and <sup>13</sup>C NMR of 4-Amino-1-(4-fluorophenyl)-1H-pyrazole (7a)

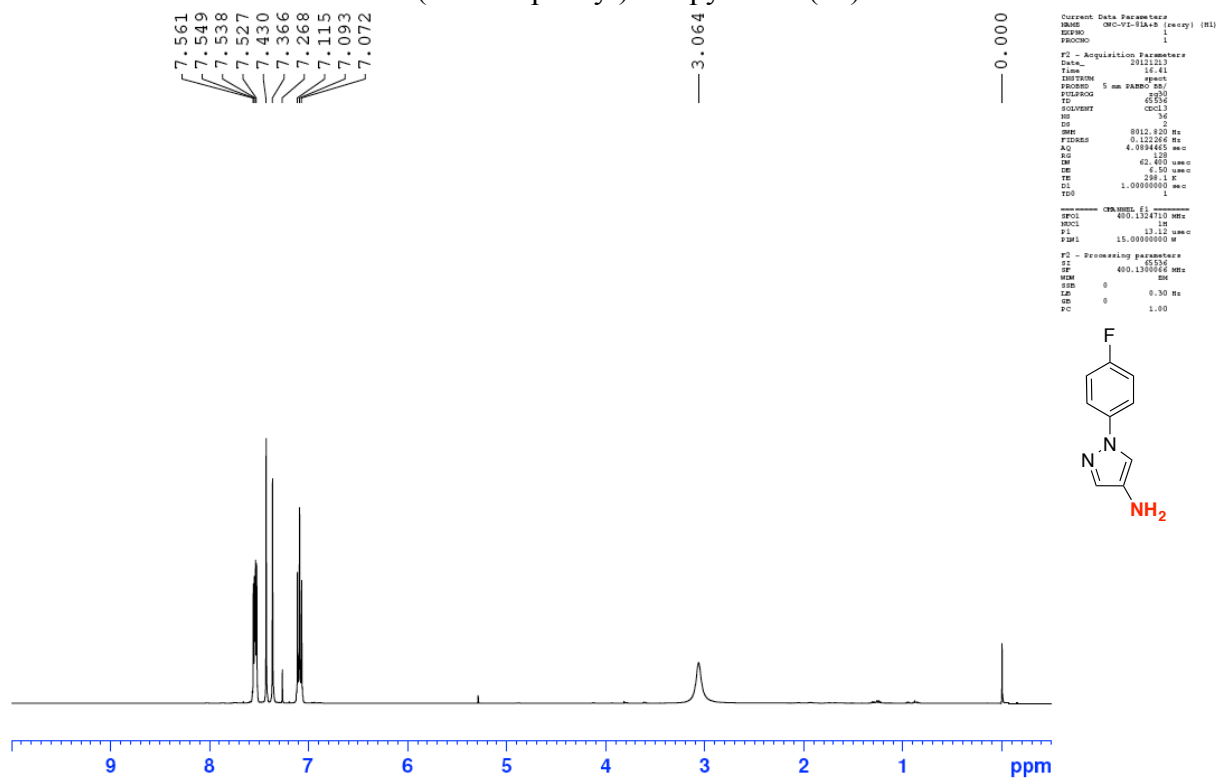

```

Current Data Parameters
NAME 0M-VI-11A18 (copy) (H1)
EXPNO 1
PROCNO 1
F2 - Acquisition Parameters
Date_ 20121213
Time 16:41
INSTRUM spect
PROBHD 5 mm PABBO BBI/
PULPROG zgpg30
TD 65536
SOLVENT CDCl3
NS 2
DS 4
SWH 8912.820 Hz
FIDRES 0.122856 Hz
AQ 4.989465 sec
RG 67.500
DF 67.500
DE 6.50 uMm c
TE 298.15
D1 1.00000000 sec
TD0 1
----- CHANNEL f1 -----
SFO1 400.1524710 MHz
NUC1 1H
P1 13.12 uMm c
SFO1 15.00000000 W
F2 - Processing parameters
SI 400.155326 MHz
SF 400.155326 MHz
WDW EM
SSB 0
LB 0.30 Hz
GB 0
PC 1.00
    
```

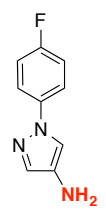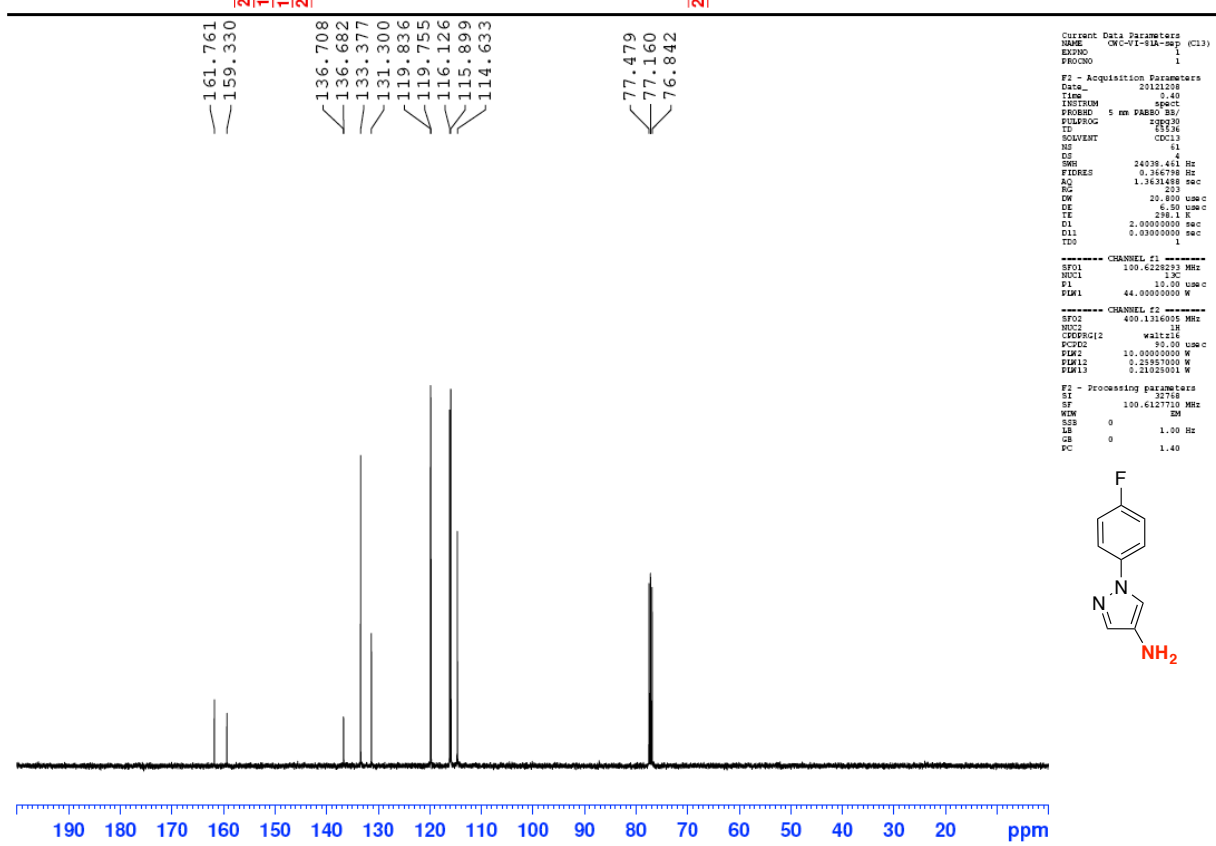

```

Current Data Parameters
NAME 0M-VI-11A-18 (C13)
EXPNO 1
PROCNO 1
F2 - Acquisition Parameters
Date_ 20121208
Time 0:40
INSTRUM spect
PROBHD 5 mm PABBO BBI/
PULPROG zgpg30
TD 65536
SOLVENT CDCl3
NS 4
DS 4
SWH 24038.481 Hz
FIDRES 0.366798 Hz
AQ 1.3631498 sec
RG 253
DF 20.800 uMm c
DE 6.50 uMm c
TE 298.15
D1 2.00000000 sec
D11 0.03000000 sec
TD0 1
----- CHANNEL f1 -----
SFO1 100.6218213 MHz
NUC1 13C
P1 41.00 uMm c
SFO1 44.00000000 W
----- CHANNEL f2 -----
SFO2 400.1316015 MHz
NUC2 13C
CPRPRG12 waltz16
PCPRG2 50.00 uMm c
P1M2 10.00000000 W
P1M12 0.20000000 W
P1M13 0.21021901 W
F2 - Processing parameters
SI 400.1316015 MHz
SF 100.6127710 MHz
WDW EM
SSB 0
LB 1.00 Hz
GB 0
PC 1.40
    
```

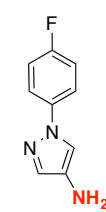

<sup>1</sup>H and <sup>13</sup>C NMR of 2-Aminobenzothiazole (7b)

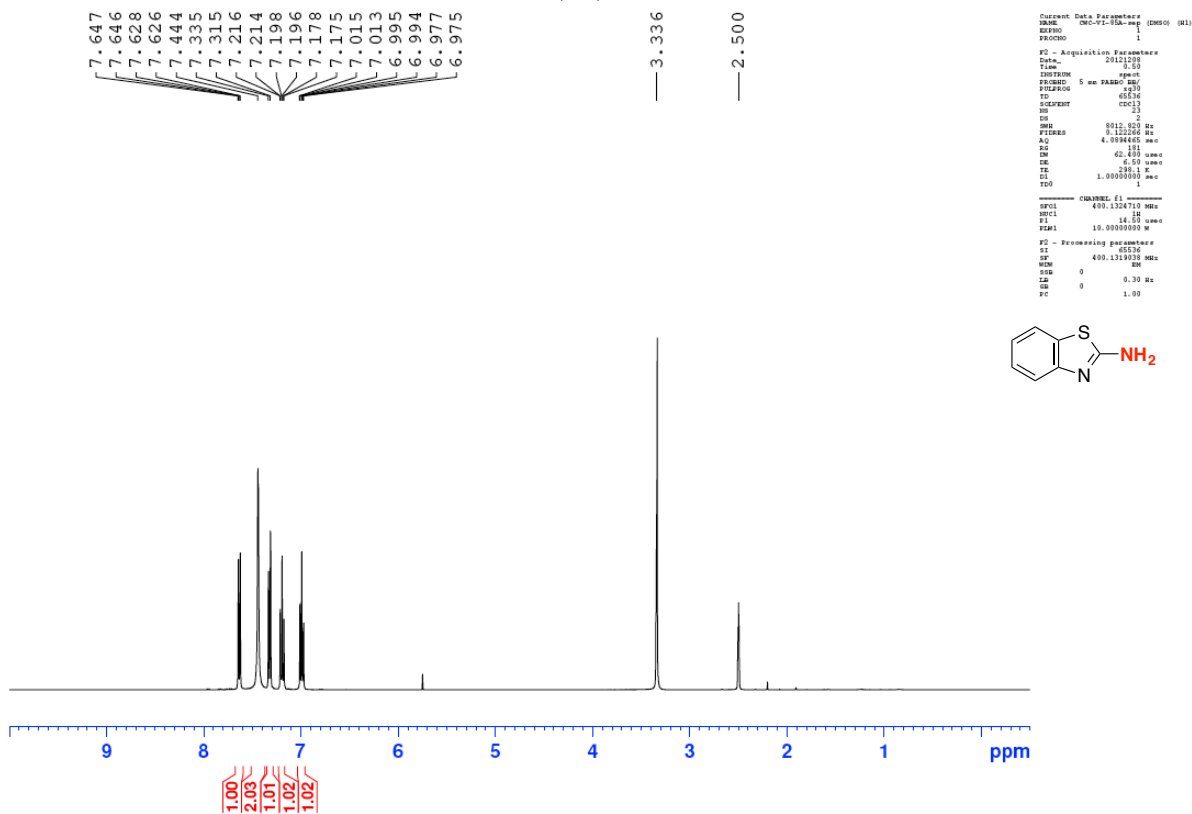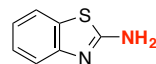

```

Current Data Parameters
NAME  CMC-7-1-20a-agg (DMSO) (H1)
EXPNO  1
PROCNO  1
F2 - Acquisition Parameters
Date_  20121208
Time  0.50
INSTRUM  spect
PROBHD  5 mm PABBO MM
PULPROG  zgpg30
TD  65536
SOLVENT  DMSO
NS  2
DS  2
SWH  8912.401 Hz
FIDRES  0.121206 Hz
AQ  4.5984601 sec
RG  42.131
DM  62.131
DE  6.50 umm
TE  298.1 K
D1  1.00000000 sec
TDO  1
===== CHANNEL f1 =====
NUC1  13C
P1  14.50 umm
PL1  10.00000000 W
F2 - Processing parameters
SI  65536
SF  400.131923 MHz
WDW  EM
SSB  0
LB  0.30 Hz
GB  0
PC  1.00
    
```

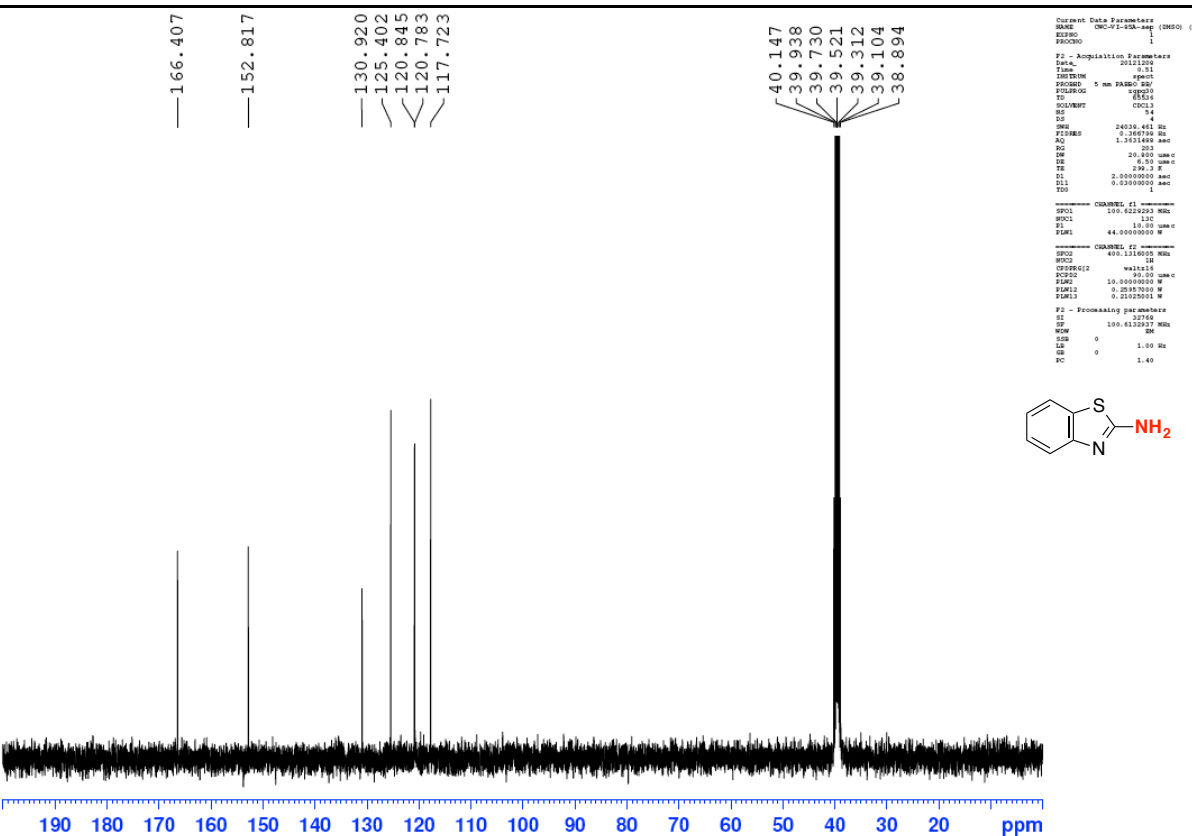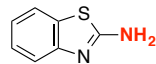

```

Current Data Parameters
NAME  CMC-7-1-20a-agg (DMSO) (C)
EXPNO  1
PROCNO  1
F2 - Acquisition Parameters
Date_  20121208
Time  0.51
INSTRUM  spect
PROBHD  5 mm PABBO MM
PULPROG  zgpg30
TD  65536
SOLVENT  DMSO
NS  14
DS  2
SWH  24026.481 Hz
FIDRES  1.3431693 Hz
AQ  1.3431693 sec
RG  42.131
DM  20.500 umm
DE  6.50 umm
TE  298.1 K
D1  2.00000000 sec
D11  0.20000000 sec
TDO  1
===== CHANNEL f1 =====
NUC1  13C
P1  13.20
PL1  10.00000000 W
F2 - Processing parameters
SI  65536
SF  400.131923 MHz
WDW  EM
SSB  0
LB  1.00 Hz
GB  0
PC  1.40
    
```

<sup>1</sup>H and <sup>13</sup>C NMR of 3-Amino-1-benzyl-1H-indazole (7c)

7.513  
7.511  
7.308  
7.305  
7.290  
7.287  
7.284  
7.276  
7.269  
7.267  
7.259  
7.255  
7.241  
7.231  
7.225  
7.219  
7.212  
7.203  
7.187  
7.173  
7.168  
7.152  
7.020  
7.018  
7.003  
7.000  
6.998  
6.983  
6.981  
5.343  
4.105

— 0.000

```
Current Data Parameters
NAME CWC-VI-91A-B-9ap (H1)
EXPNO 1
PROCNO 1

F2 - Acquisition Parameters
Date_ 20121111
Time 20.43
INSTRUM spect
PROBHD 5 mm PABBO BB/
PULPROG zgpg30
TD 65536
SOLVENT CDCl3
NS 47
DS 4
SWH 8012.810 Hz
FIDRES 0.112266 Hz
AQ 4.087465 sec
RG 80.6
RW 62.400 usec
DE 6.50 usec
TE 298.2 K
D1 1.0000000 sec
TD0 1

----- CHANNEL f1 -----
SFO1 400.1304710 MHz
NUC1 1H
P1 13.12 usec
PL1 15.0000000 W

F2 - Processing parameters
SI 65536
SF 400.1300211 MHz
WDW EM
SSB 0
LB 0.30 Hz
GB 0
PC 1.00
```

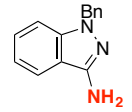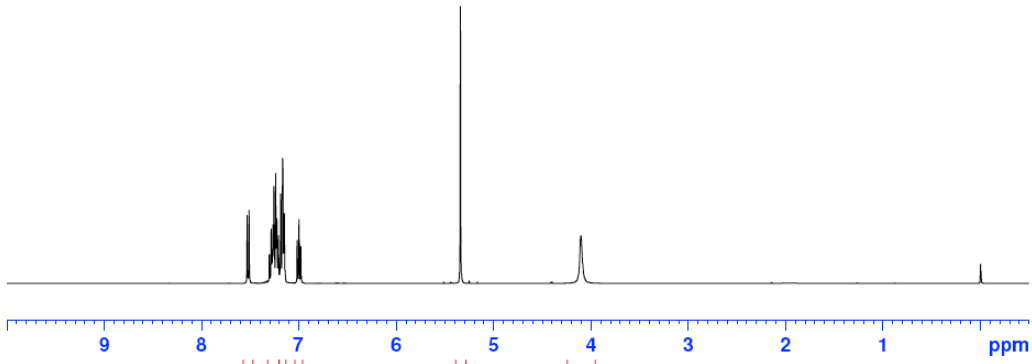

1.00  
4.03  
3.11  
1.02  
2.06  
2.02

147.525  
141.413  
137.633  
128.714  
127.584  
127.138  
127.126  
119.688  
118.780  
115.058  
109.020

77.478  
77.161  
76.843

— 52.171

```
Current Data Parameters
NAME CWC-VI-91A-B-9ap (C13)
EXPNO 1
PROCNO 1

F2 - Acquisition Parameters
Date_ 20121111
Time 20.45
INSTRUM spect
PROBHD 5 mm PABBO BB/
PULPROG zgpg30
TD 65536
SOLVENT CDCl3
NS 235
DS 4
SWH 24038.461 Hz
FIDRES 0.366799 Hz
AQ 1.3631489 sec
RG 203
RW 20.000 usec
DE 6.50 usec
TE 298.2 K
D1 2.0000000 sec
D11 0.0300000 sec
TD0 1

----- CHANNEL f1 -----
SFO1 100.6220293 MHz
NUC1 13C
P1 16.00 usec
PL1 49.0000000 W

----- CHANNEL f2 -----
SFO2 400.1310015 MHz
NUC2 1H
COPROG2 waltz16
PCPD2 90.00 usec
PLM2 15.0000000 W
PLM12 0.3187699 W
PLM13 0.2581699 W

F2 - Processing parameters
SI 32768
SF 100.6127676 MHz
WDW EM
SSB 0
LB 1.00 Hz
GB 0
PC 1.40
```

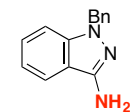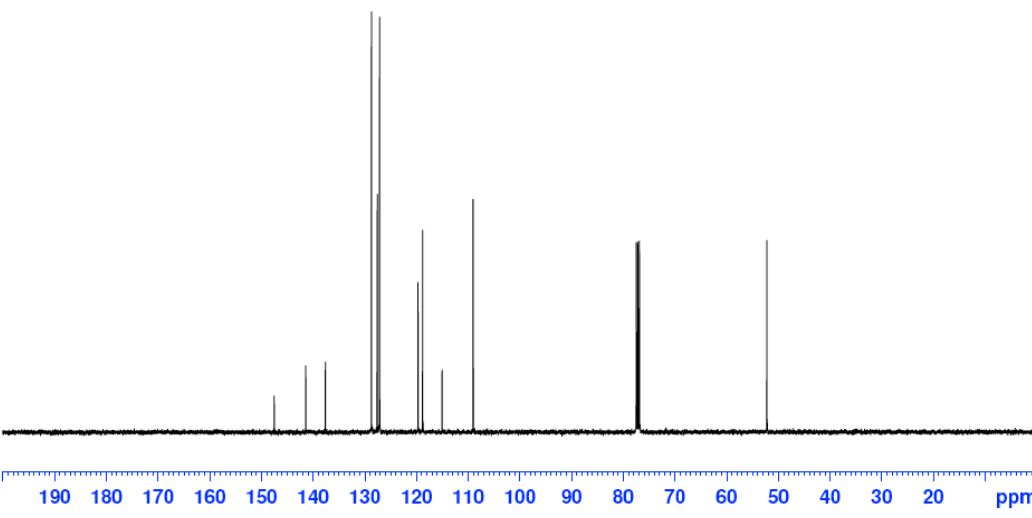



<sup>1</sup>H and <sup>13</sup>C NMR of 4-Amino-1-trityl-1H-imidazole (7d)

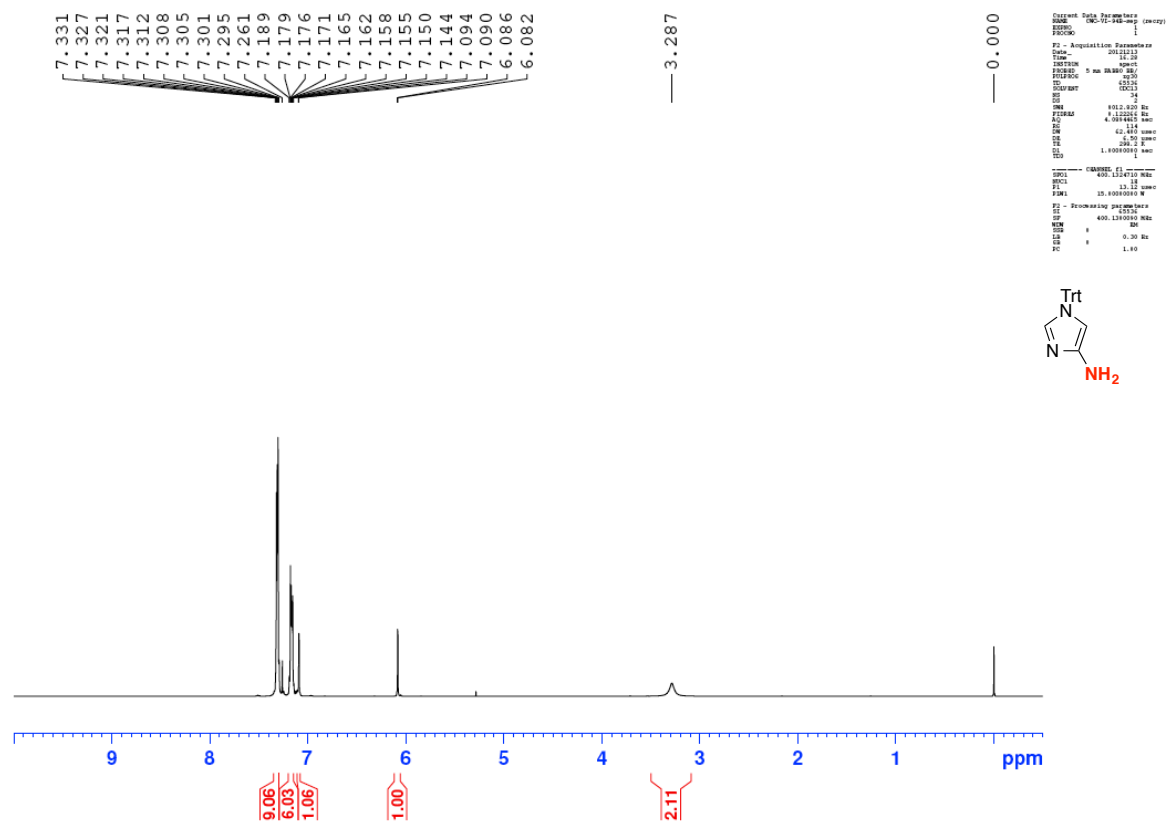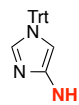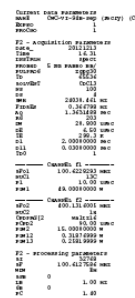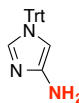

<sup>1</sup>H and <sup>13</sup>C NMR of 4-Amino-1-trityl-1H-pyrazole (7e)

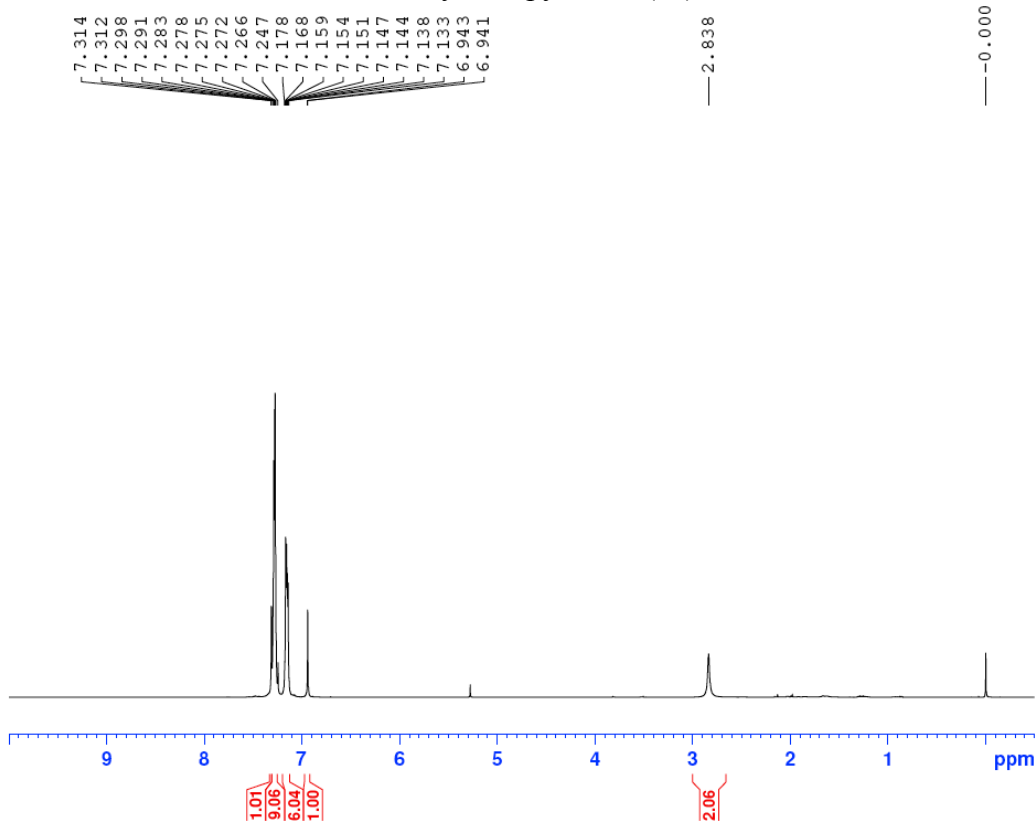

```

Current Data Parameters
NAME CWC-VI-82A-seq (H1)
EXPNO 1
PROCNO 1

F2 - Acquisition Parameters
Date_ 20121206
Time 17:49
INSTRUM spect
PROBHD 5 mm PABBO BB/
PULPROG zgpg30
TD 65536
SOLVENT cdcl3
NS 4
DS 2
SWH 9012.920 Hz
FIDRES 0.122266 Hz
AQ 4.0894465 sec
RG 64
DW 62.400 usec
DE 6.50 usec
TE 296.2 K
D1 1.0000000 sec
D11 1
D12 1

----- CHANNEL f1 -----
SFO1 400.1324710 MHz
NUC1 13C
P1 14.50 usec
PLW1 10.0000000 W

F2 - Processing parameters
SI 65536
SF 400.1300145 MHz
WDW EM
SSB 0
LB 0.30 Hz
GB 0
PC 1.00
    
```

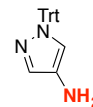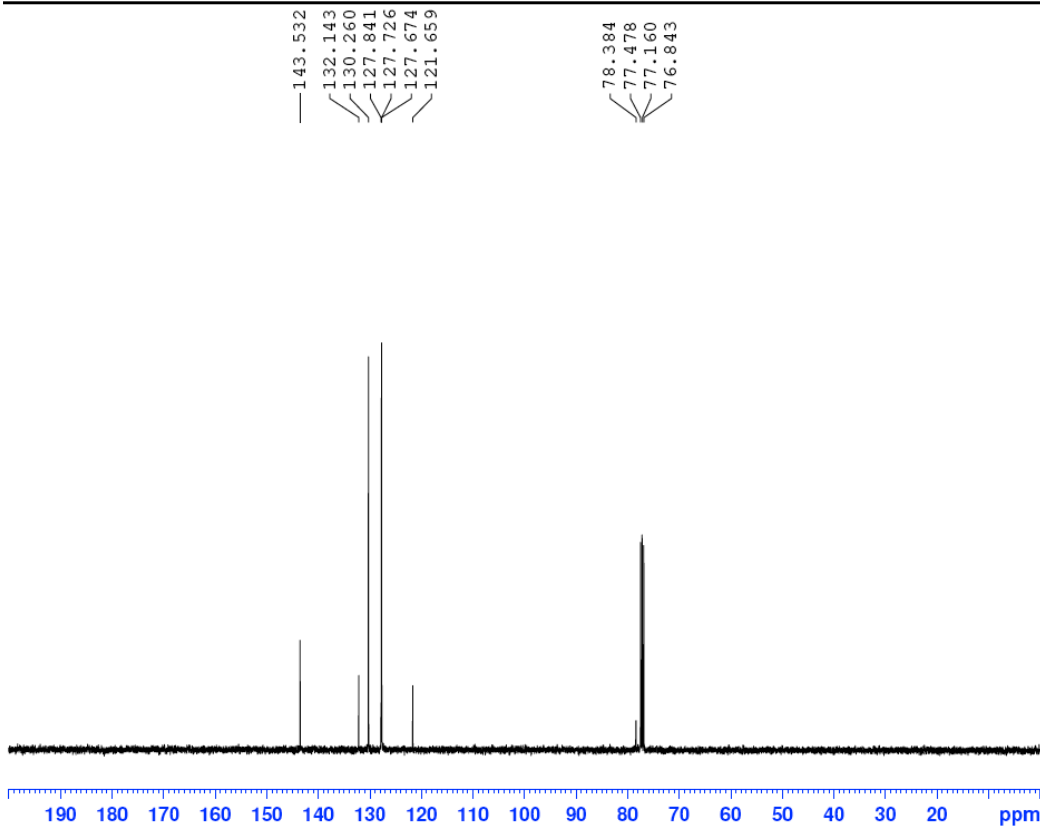

```

Current Data Parameters
NAME CWC-VI-82A-seq (C13)
EXPNO 1
PROCNO 1

F2 - Acquisition Parameters
Date_ 20121206
Time 17:53
INSTRUM spect
PROBHD 5 mm PABBO BB/
PULPROG zgpg30
TD 65536
SOLVENT cdcl3
NS 4
DS 2
SWH 24098.461 Hz
FIDRES 0.366796 Hz
AQ 1.3631488 sec
RG 203
DW 20.000 usec
DE 6.50 usec
TE 296.2 K
D1 2.0000000 sec
D11 0.0300000 sec
D12 1

----- CHANNEL f1 -----
SFO1 100.6282693 MHz
NUC1 13C
P1 10.00 usec
PLW1 44.0000000 W

----- CHANNEL f2 -----
SFO2 400.1316095 MHz
NUC2 1H
OPRG12 waltz16
PCPD2 90.00 usec
PLW2 10.0000000 W
PLW12 0.25957000 W
PLW13 0.21025001 W

F2 - Processing parameters
SI 32768
SF 100.6127914 MHz
WDW EM
SSB 0
LB 1.00 Hz
GB 0
PC 1.40
    
```

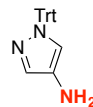

<sup>1</sup>H and <sup>13</sup>C NMR of 3-methyl-4-amino-1-trityl-1H-pyrazole (7f)

7.278  
7.269  
7.261  
7.253  
7.244  
7.237  
7.184  
7.175  
7.166  
7.162  
7.157  
7.151  
7.140  
6.833

2.668  
2.168

-0.000

```

=====
Name: 3-methyl-4-amino-1-trityl-1H-pyrazole (7f)
Date_ 20121117
Time_ 11:34
INSTRUM spect
PROBHD 5 mm BBO-51
PULPROG zgpg30
TD 65536
SOLVENT d
NS 2
DS 4
SWH 602.820 MHz
F2 - Acquisition Parameters
Date_ 20121117
Time_ 11:34
INSTRUM spect
PROBHD 5 mm BBO-51
PULPROG zgpg30
TD 65536
SOLVENT d
NS 2
DS 4
SWH 602.820 MHz
F2 - Processing parameters
Date_ 20121117
Time_ 11:34
INSTRUM spect
PROBHD 5 mm BBO-51
PULPROG zgpg30
TD 65536
SOLVENT d
NS 2
DS 4
SWH 602.820 MHz
=====

```

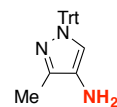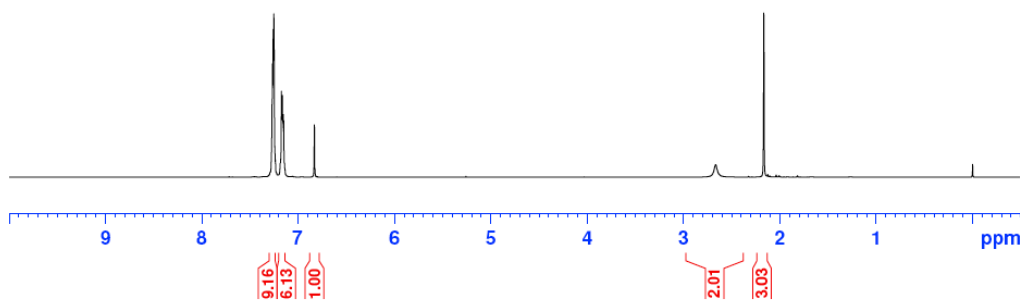

143.784  
140.102  
130.229  
127.669  
127.496  
125.260  
122.233

77.769  
77.479  
77.161  
76.843

11.106

```

=====
Name: 3-methyl-4-amino-1-trityl-1H-pyrazole (7f)
Date_ 20121117
Time_ 11:34
INSTRUM spect
PROBHD 5 mm BBO-51
PULPROG zgpg30
TD 65536
SOLVENT d
NS 2
DS 4
SWH 602.820 MHz
F2 - Acquisition Parameters
Date_ 20121117
Time_ 11:34
INSTRUM spect
PROBHD 5 mm BBO-51
PULPROG zgpg30
TD 65536
SOLVENT d
NS 2
DS 4
SWH 602.820 MHz
F2 - Processing parameters
Date_ 20121117
Time_ 11:34
INSTRUM spect
PROBHD 5 mm BBO-51
PULPROG zgpg30
TD 65536
SOLVENT d
NS 2
DS 4
SWH 602.820 MHz
=====

```

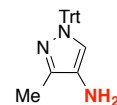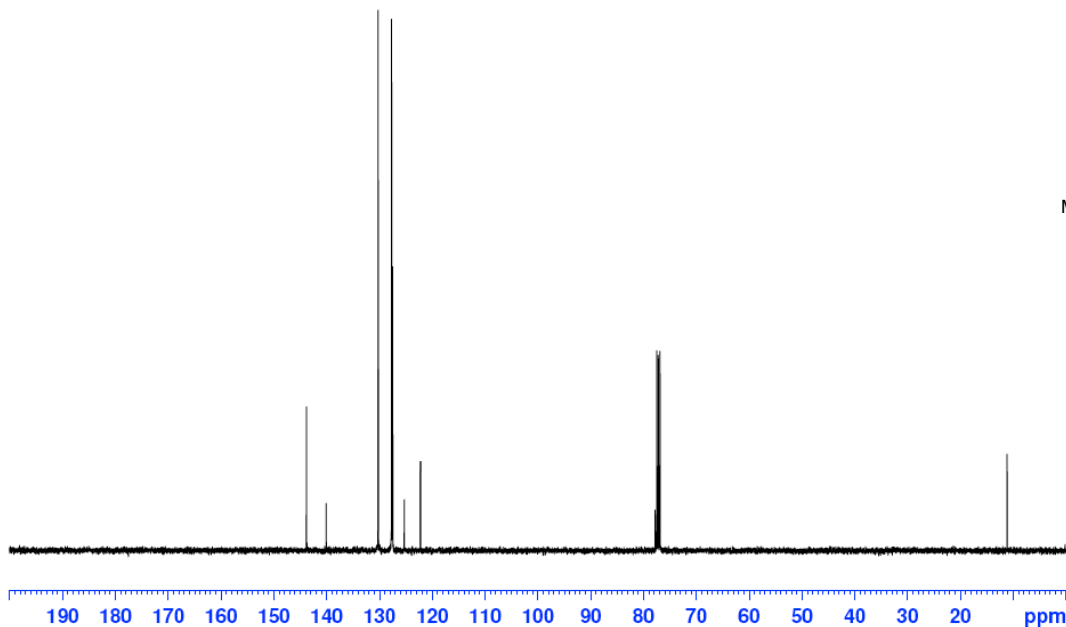

<sup>1</sup>H and <sup>13</sup>C NMR of 4-Amino-1,3,5-trimethyl-1*H*-pyrazole (**7g**)

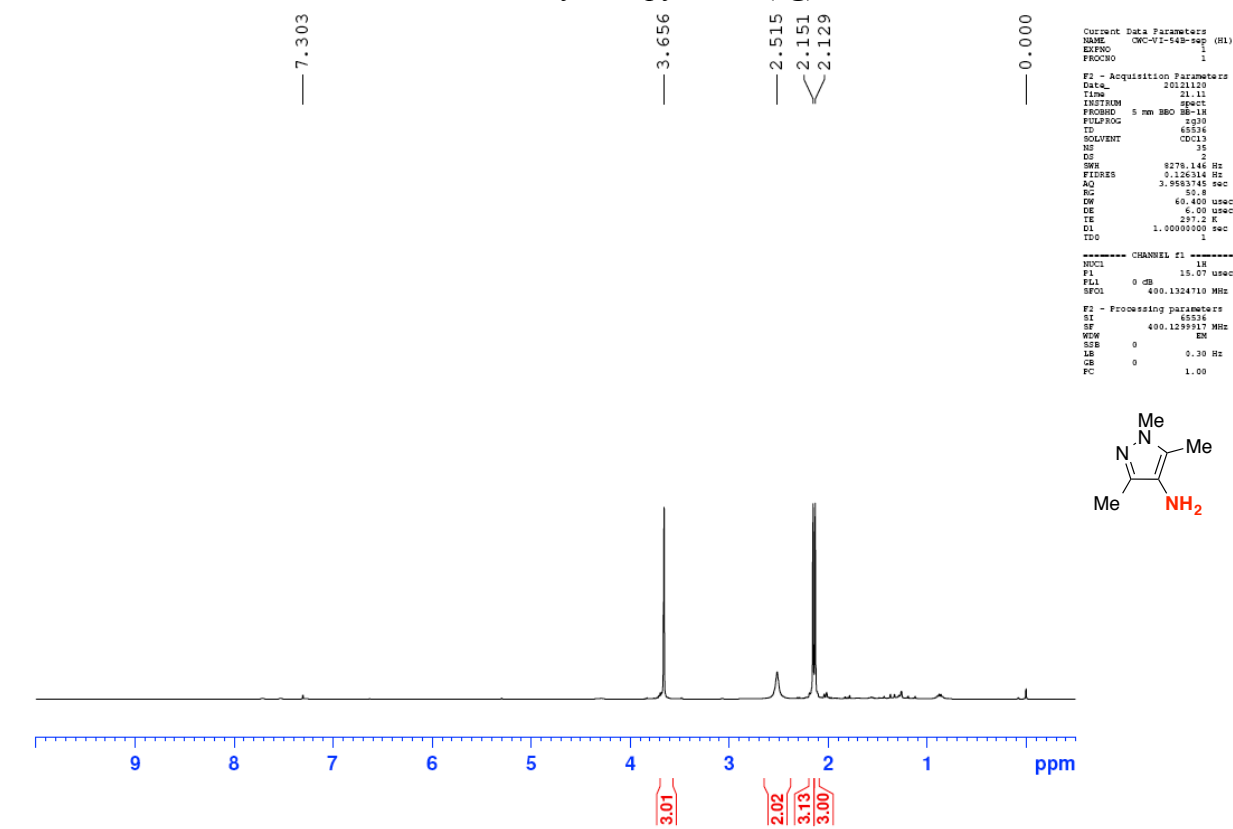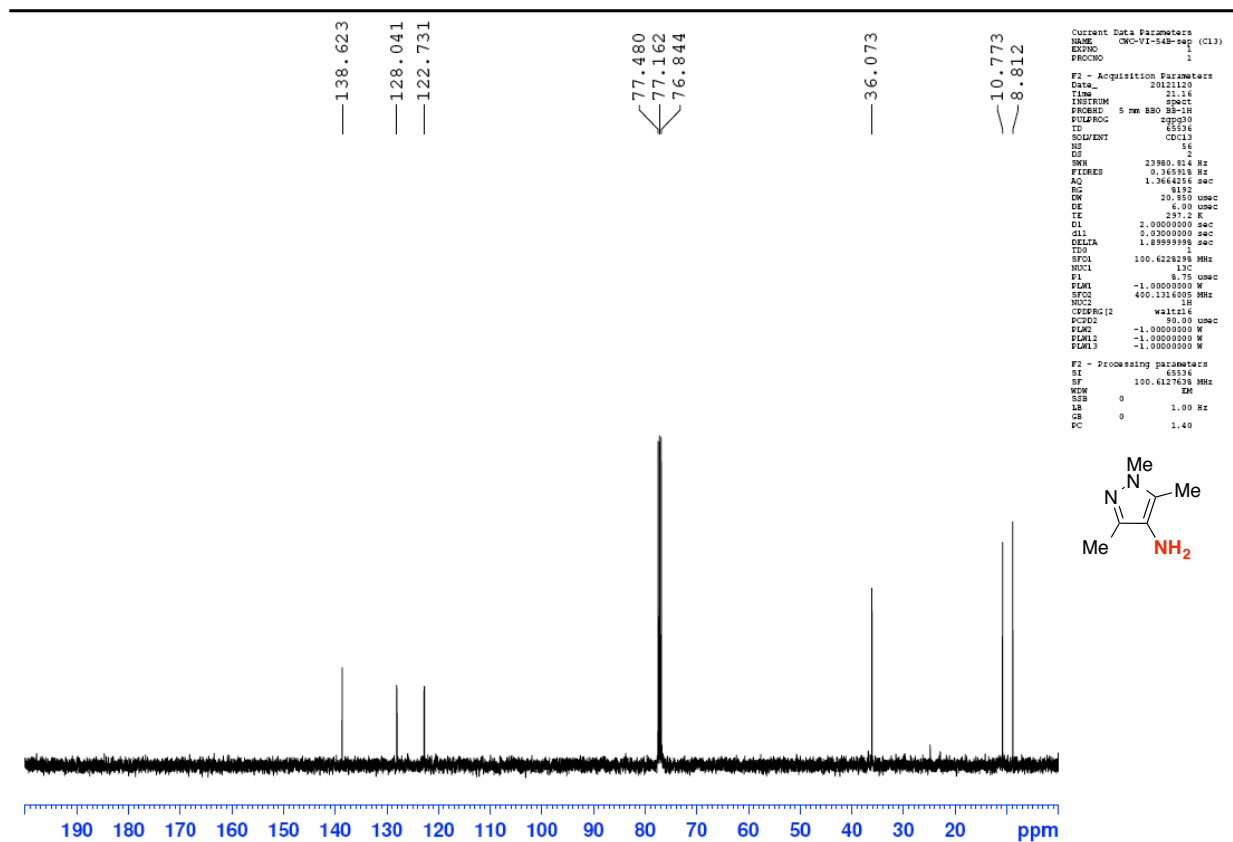

<sup>1</sup>H and <sup>13</sup>C NMR of 4-Amino-3,5-dimethyl-1-trityl-1H-pyrazole (7h)

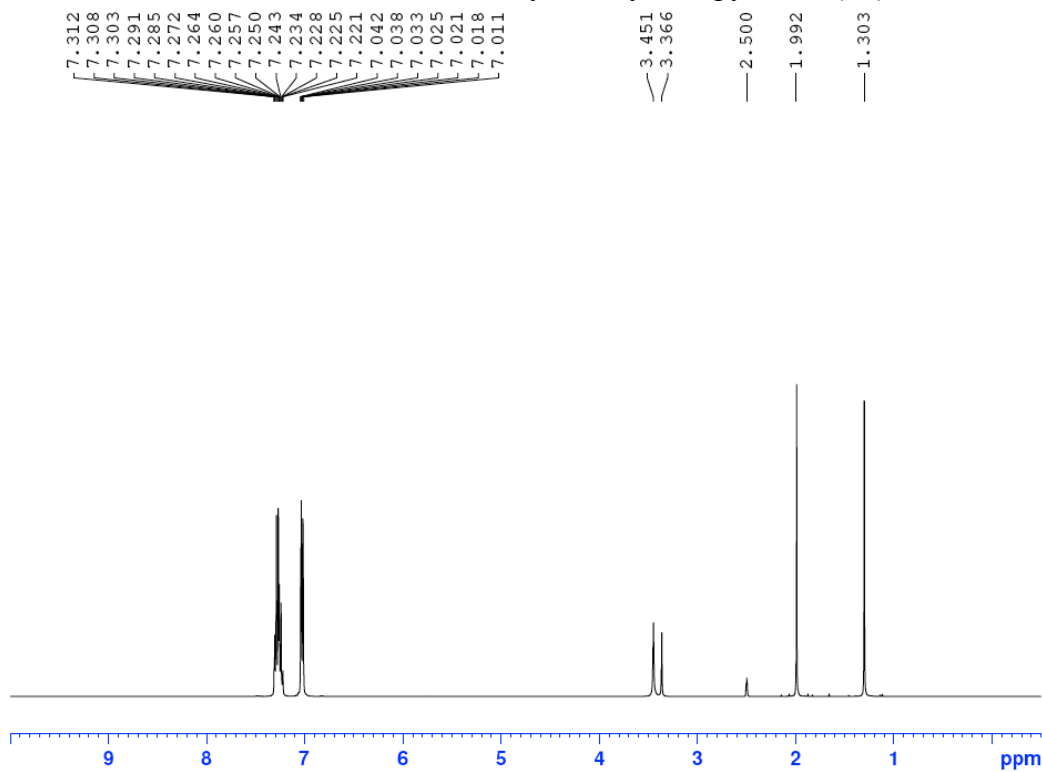

```

Current Data Parameters
NAME  CMC-VI-7A (exp) (3) (M1)
EXPNO  1
PROCNO  1
F2 - Acquisition Parameters
Date_  20121205
Time  22.54
INSTRUM  spect
PROBHD  5 mm PABBO BB/
PULPROG  zgpg30
TD  65536
SOLVENT  cdcl3
NS  23
DS  2
SWH  8012.820 Hz
FIDRES  0.122368 Hz
AQ  4.989465 sec
RG  37
DM  62.400 usec
DE  6.50 usec
TE  295.1 K
CL  1.00000000 sec
TD0  1
===== CHANNEL f1 =====
NUC1  1H
P1  18
PL1  14.50 usec
PLM1  10.0000000 W
F2 - Processing parameters
SI  400.1324710 MHz
SF  400.1318937
WDW  EM
SSB  0
LB  0.30 Hz
GB  0
PC  1.00
    
```

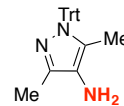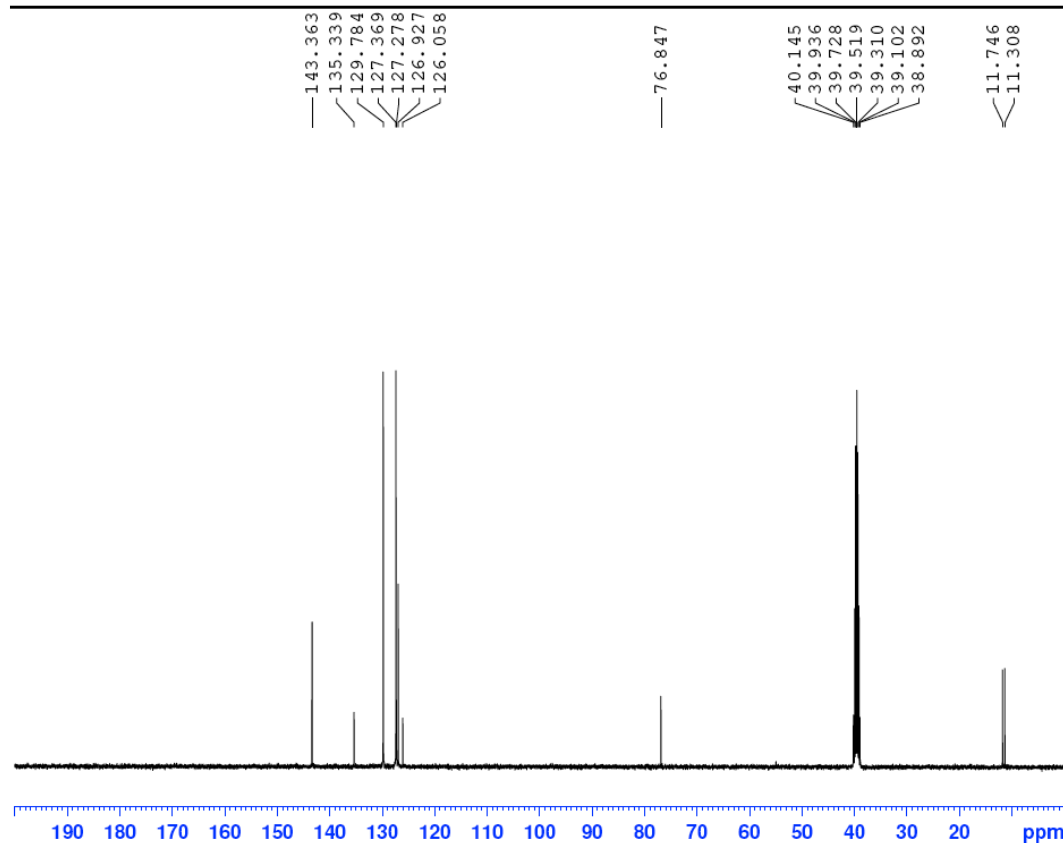

```

Current Data Parameters
NAME  CMC-VI-7A (exp) (C1)
EXPNO  1
PROCNO  1
F2 - Acquisition Parameters
Date_  20121205
Time  16.14
INSTRUM  spect
PROBHD  5 mm PABBO BB/
PULPROG  zgpg30
TD  65536
SOLVENT  cdcl3
NS  125
DS  4
SWH  24039.461 Hz
FIDRES  0.362798 Hz
AQ  1.3631489 sec
RG  203
DM  20.890 usec
DE  6.00 usec
TE  294.3 K
CL  2.00000000 sec
DIL1  0.03000000 sec
TD0  1
===== CHANNEL f1 =====
NUC1  13C
P1  12
PL1  10.00 usec
PLM1  44.00000000 W
===== CHANNEL f2 =====
NUC2  1H
P2PRG2  waltz16
PCPD2  80.00 usec
PLM2  10.00000000 W
PLM13  0.25957000 W
PLM14  0.21020000 W
F2 - Processing parameters
SI  400.1316095 MHz
SF  400.1324710 MHz
WDW  EM
SSB  0
LB  1.00 Hz
GB  0
PC  1.40
    
```

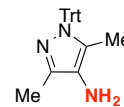

Supplement: NIHMS501213-supplement-1_si_001.pdf [file NIHMS501213-supplement-1_si_001.pdf]
